# Supplementary material for: Direct cell-to-cell transfer in stressed tumor microenvironment aggravates tumorigenic or metastatic potential in pancreatic cancer
Source: NPJ Genom Med. 2022 Oct 27;7:63. doi: 10.1038/s41525-022-00333-w (PMC9613679; doi:10.1038/s41525-022-00333-w)
Supplement: Supplementary file 1 — Supplementary Information [file 41525_2022_333_MOESM1_ESM.pdf]

## Supplementary Information for

### Direct cell-to-cell transfer in stressed tumor microenvironment aggravates tumorigenic or metastatic potential in pancreatic cancer

Giyong Jang, Jaeik Oh, Eunsung Jun, Jieun Lee, Jee Young Kwon, Jaesang Kim, Sang-Hyuk Lee, Song Cheol Kim, Sung-Yup Cho\*, Charles Lee\*

\* Correspondence: csybio@snu.ac.kr (S.-Y.C.); [Charles.Lee@jax.org](mailto:Charles.Lee@jax.org) (C.L.)

#### Supplementary appendix

##### Table of contents

|                                                                                                                                                              |            |
|--------------------------------------------------------------------------------------------------------------------------------------------------------------|------------|
| <b>Supplementary Figures .....</b>                                                                                                                           | <b>2</b>   |
| Supplementary Figure 1: Increased numbers of vacuoles or enlarged cytoplasm following DFCs isolation .....                                                   | 2          |
| Supplementary Figure 2: Genome characterization of pancreatic derivative cells from direct cell-to-cell transfer .....                                       | 5          |
| Supplementary Figure 3: Enhanced tumorsphere formation or invasive activity of pancreatic derivative cells from direct cell-to-cell transfer .....           | 7          |
| Supplementary Figure 4: Proteomic analysis of TME-derived exosomes .....                                                                                     | 8          |
| Supplementary Figure 5: Effect of CD24/CD44/MCT1 suppression on both tumorsphering and invasive activities of pancreatic derivative cancer cells .....       | 9          |
| Supplementary Figure 6: Analysis of CD24, CD44, and SLC16A1 expression in pancreatic cancer-patient tissue samples .....                                     | 11         |
| <b>Supplementary Tables .....</b>                                                                                                                            | <b>12</b>  |
| Supplementary Table 1: Transcriptomic data of pancreatic derivative cells generated via direct cell-to-cell transfer .....                                   | 12         |
| Supplementary Table 2: Proteomic analysis of the lysates of derivative cells (Panc0203, SP0926, SP1030) .....                                                | 172        |
| Supplementary Table 3: Proteomic analysis of TME-derived exosomes compared to normal TME exosomes (commonly found spots) .....                               | 173        |
| Supplementary Table 4: Proteomic analysis of TME-derived exosomes compared to normal TME exosomes (Unpaired spots) .....                                     | 174        |
| <b>Supplementary Videos .....</b>                                                                                                                            | <b>175</b> |
| Supplementary Video 1: Spontaneous TNTs formation from a derivative cell line. Bright-field light microscopy images of SP0926.....                           | 175        |
| Supplementary Video 2: Densely embedded spots of green fluorescent dye acquired from MØ-U937 <sup>CMFDA</sup> in CMTMR-positive pancreatic cancer cells..... | 175        |

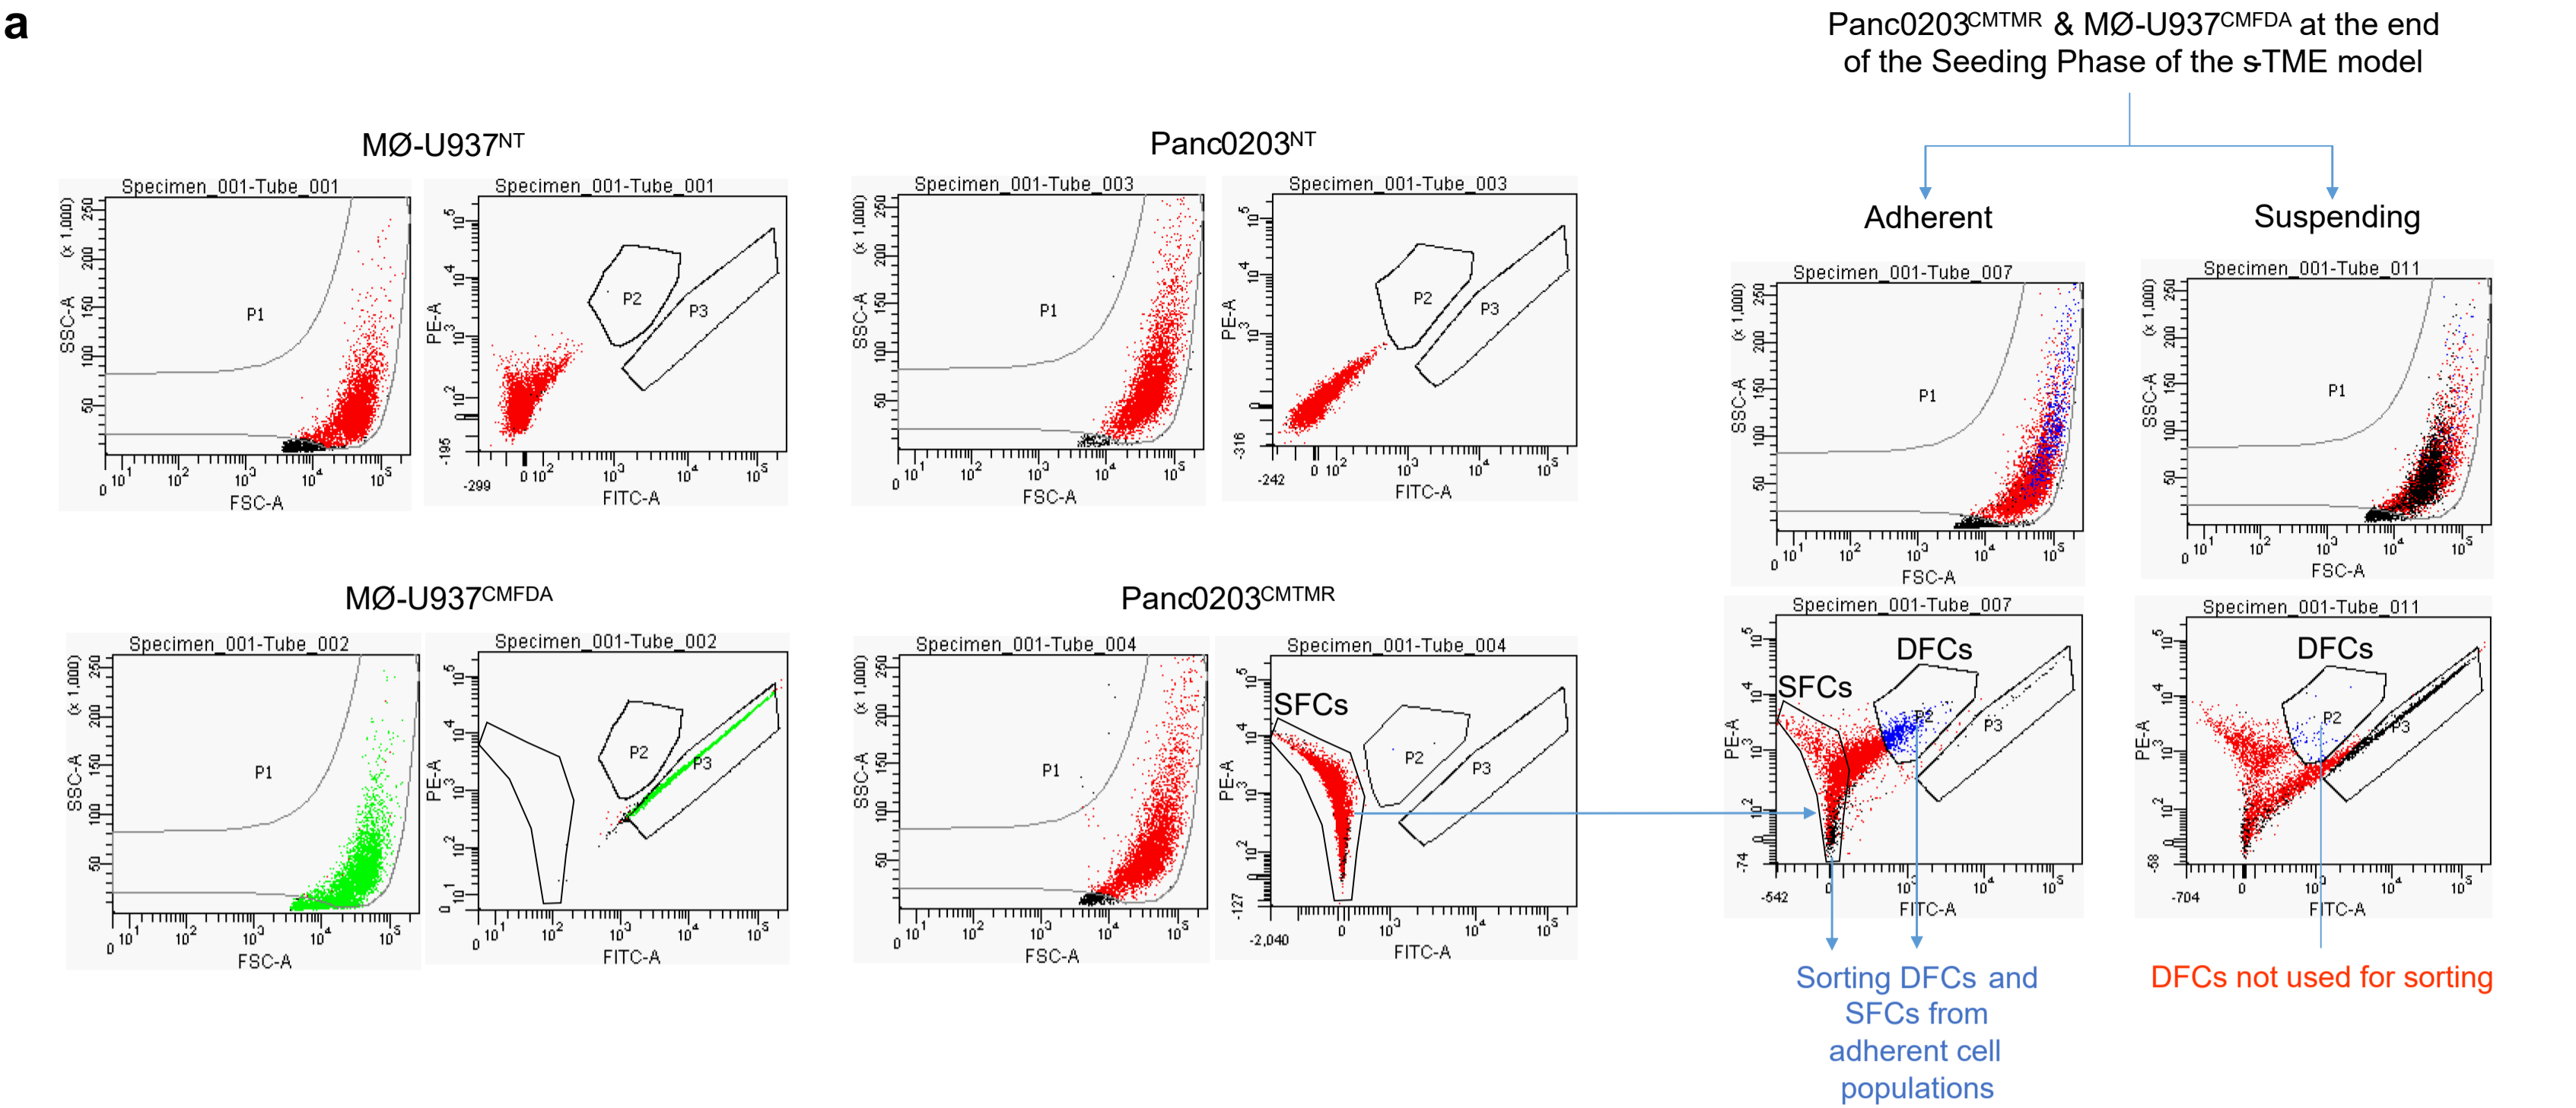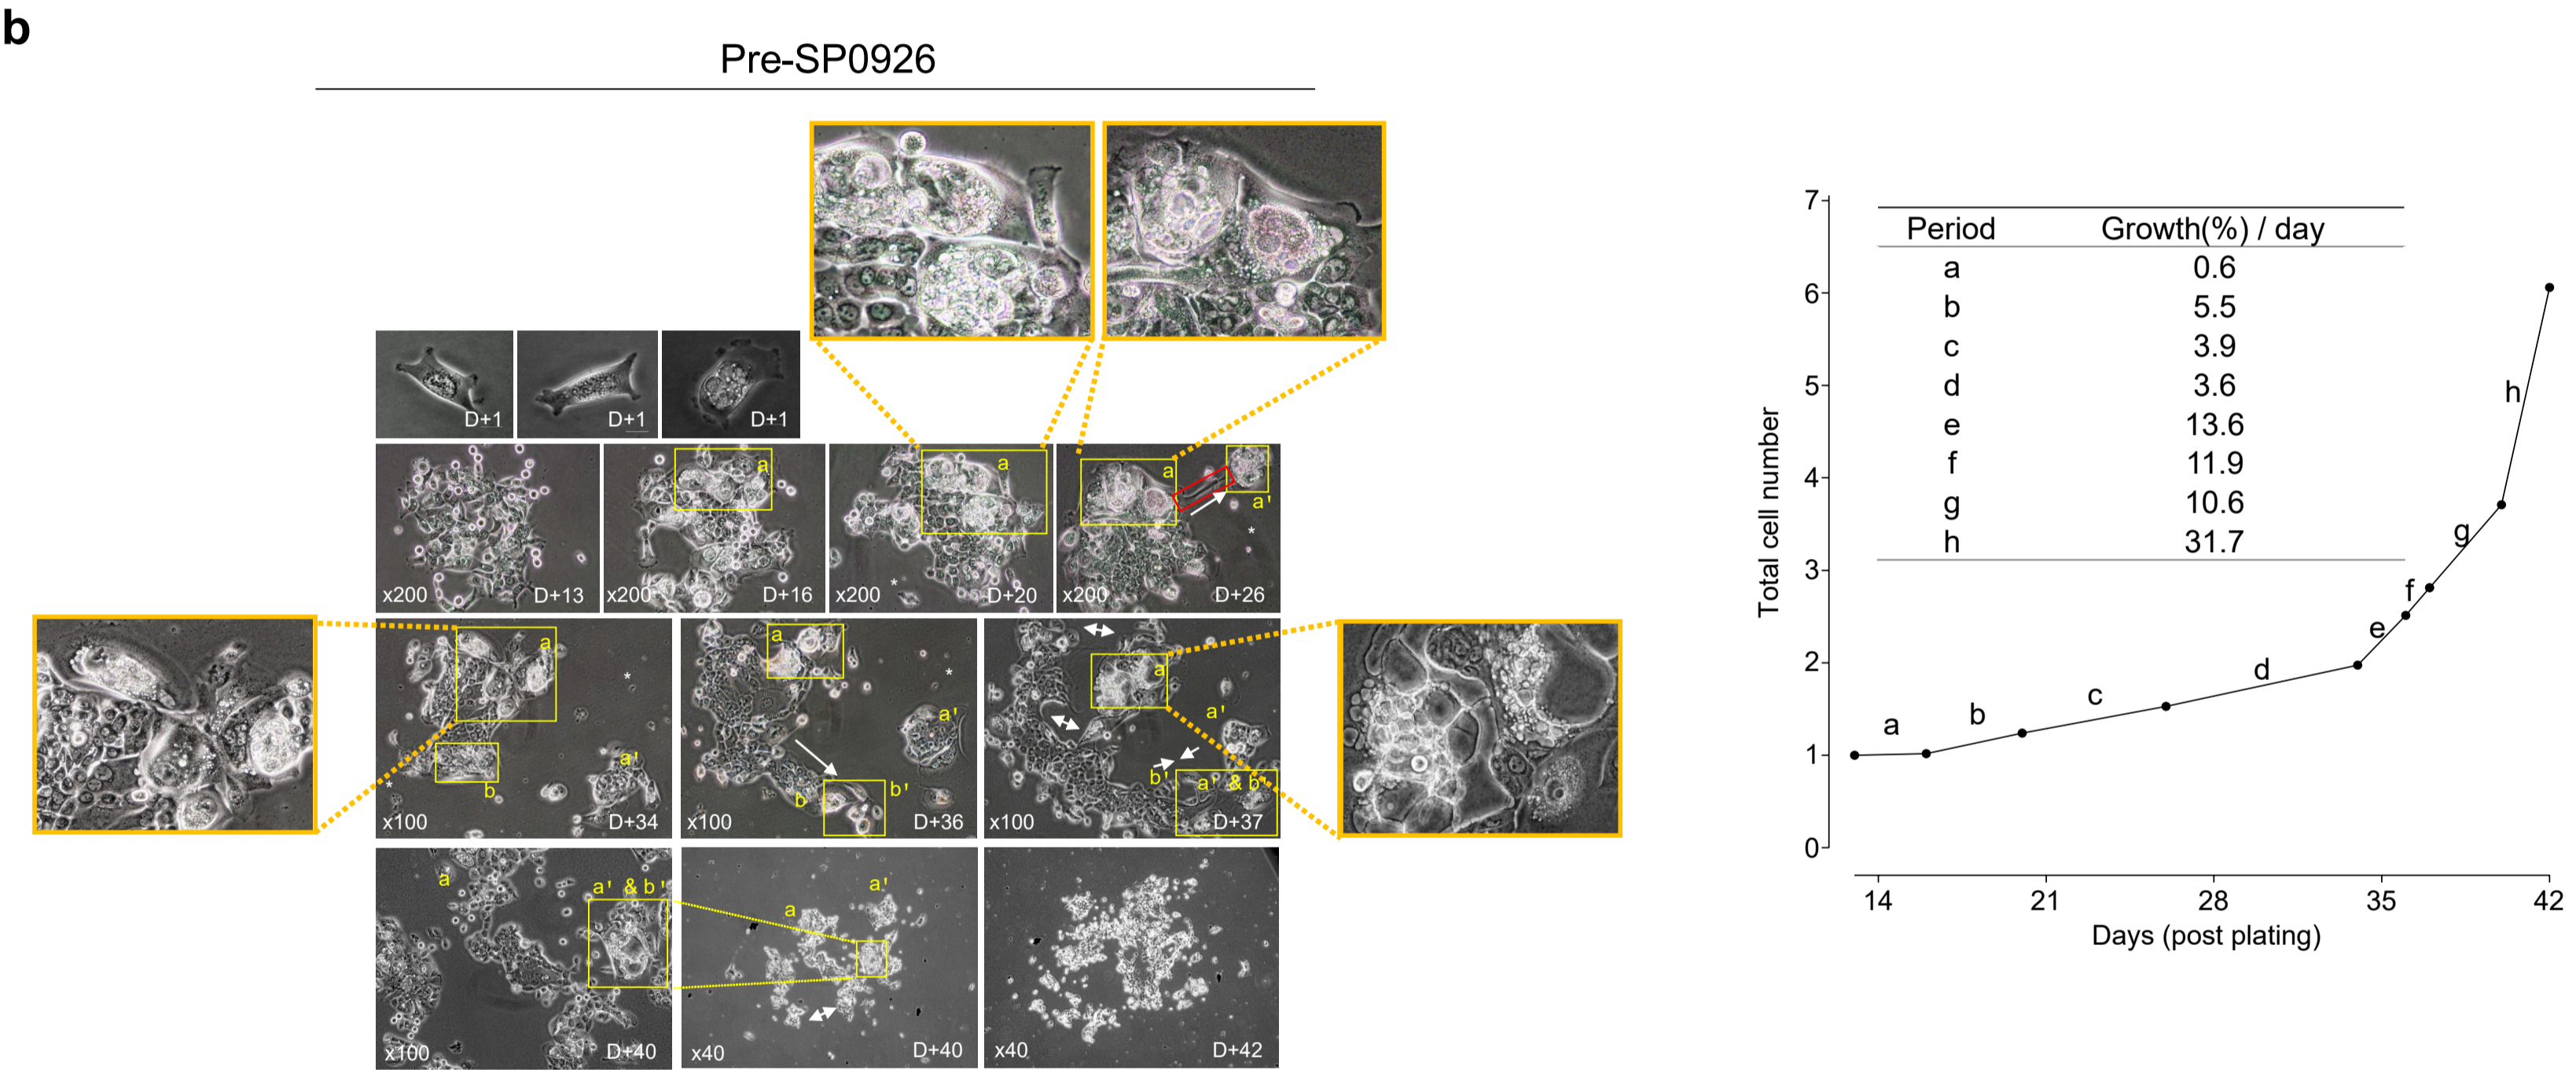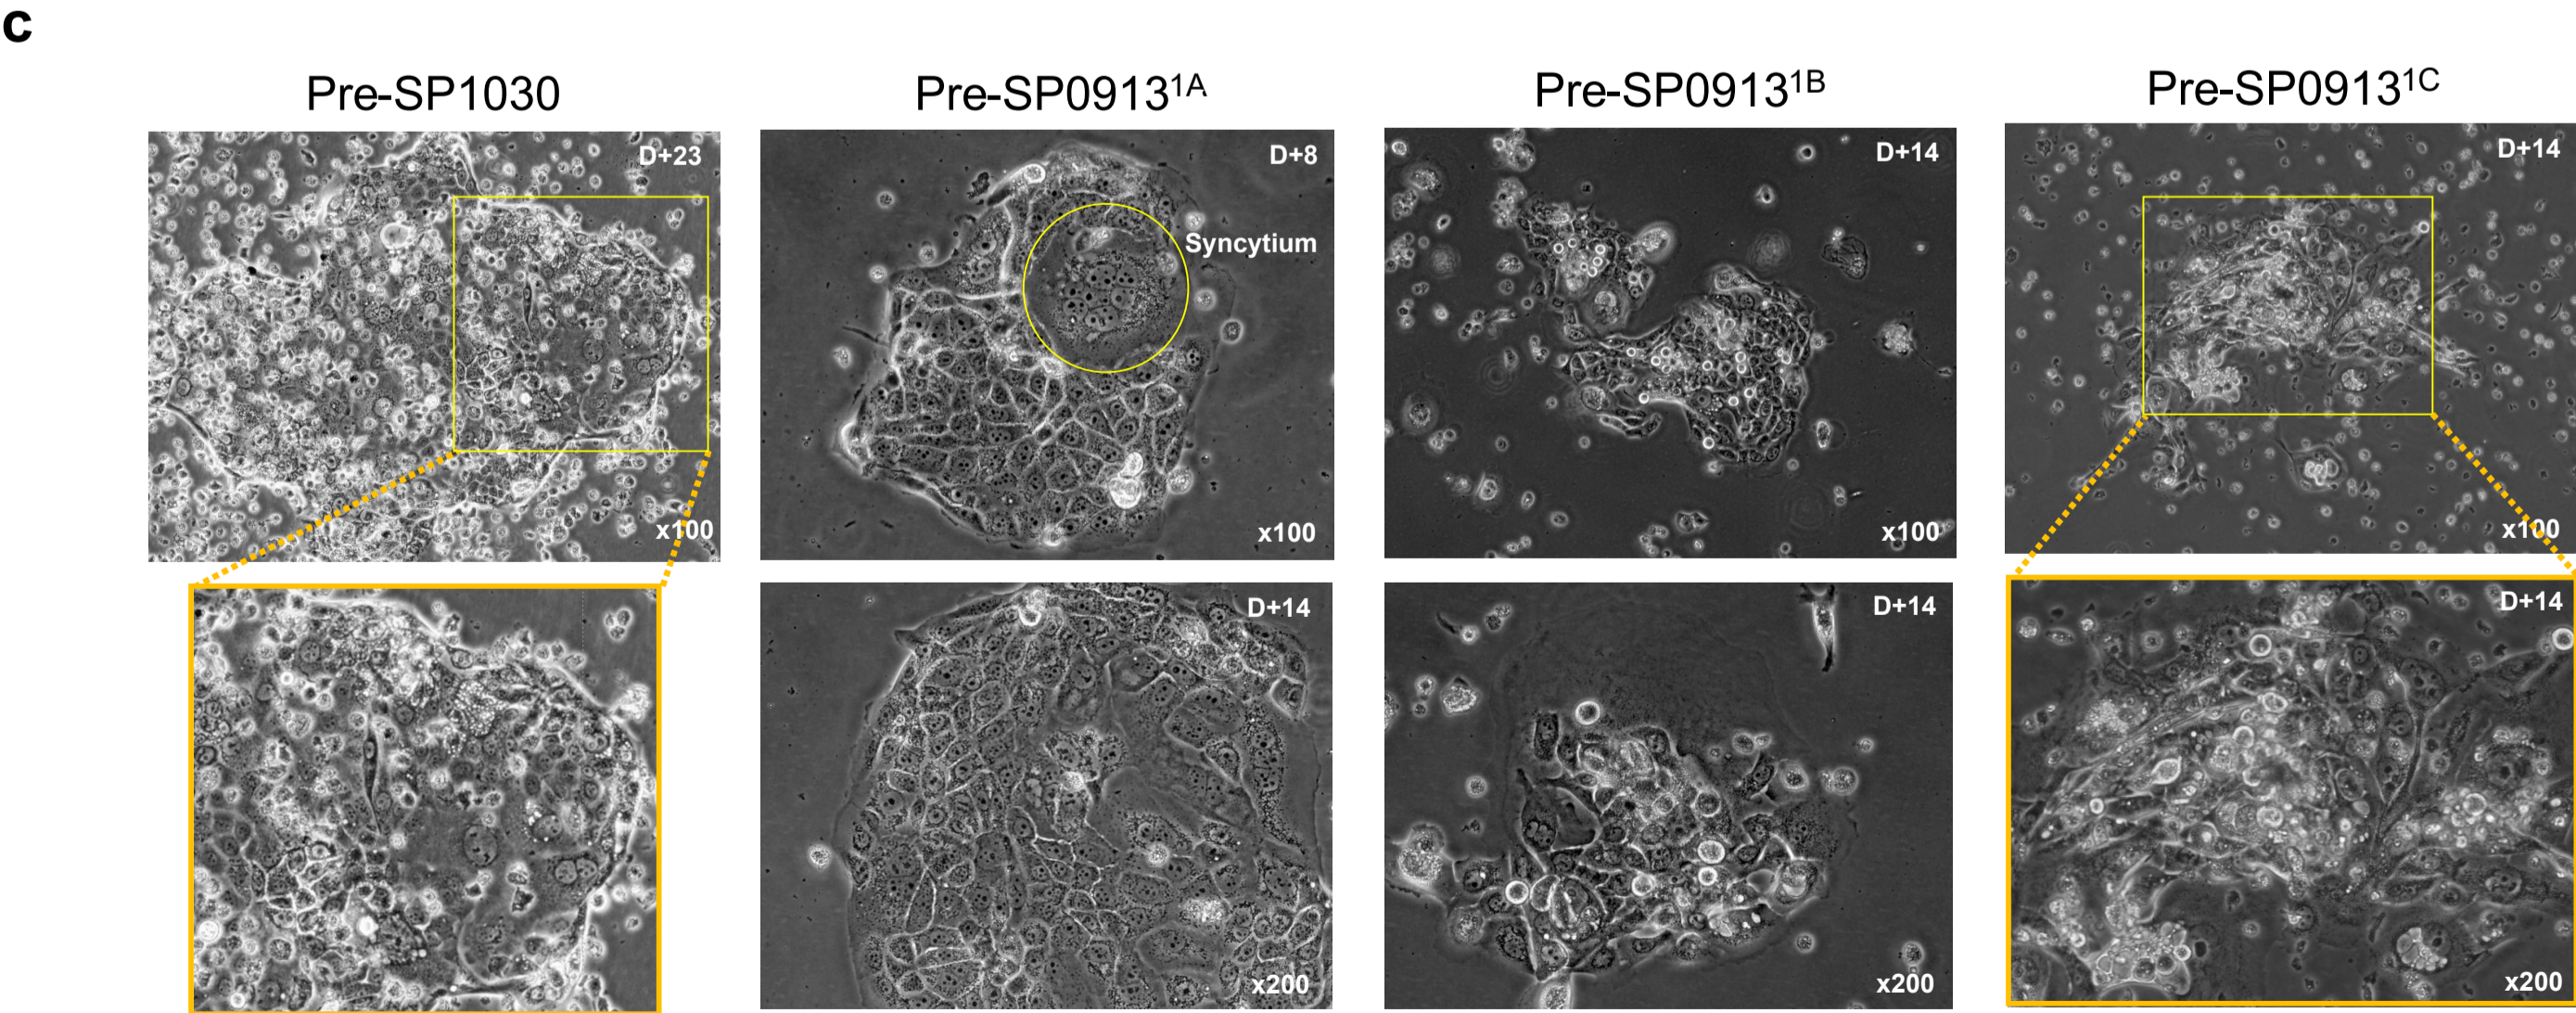

d

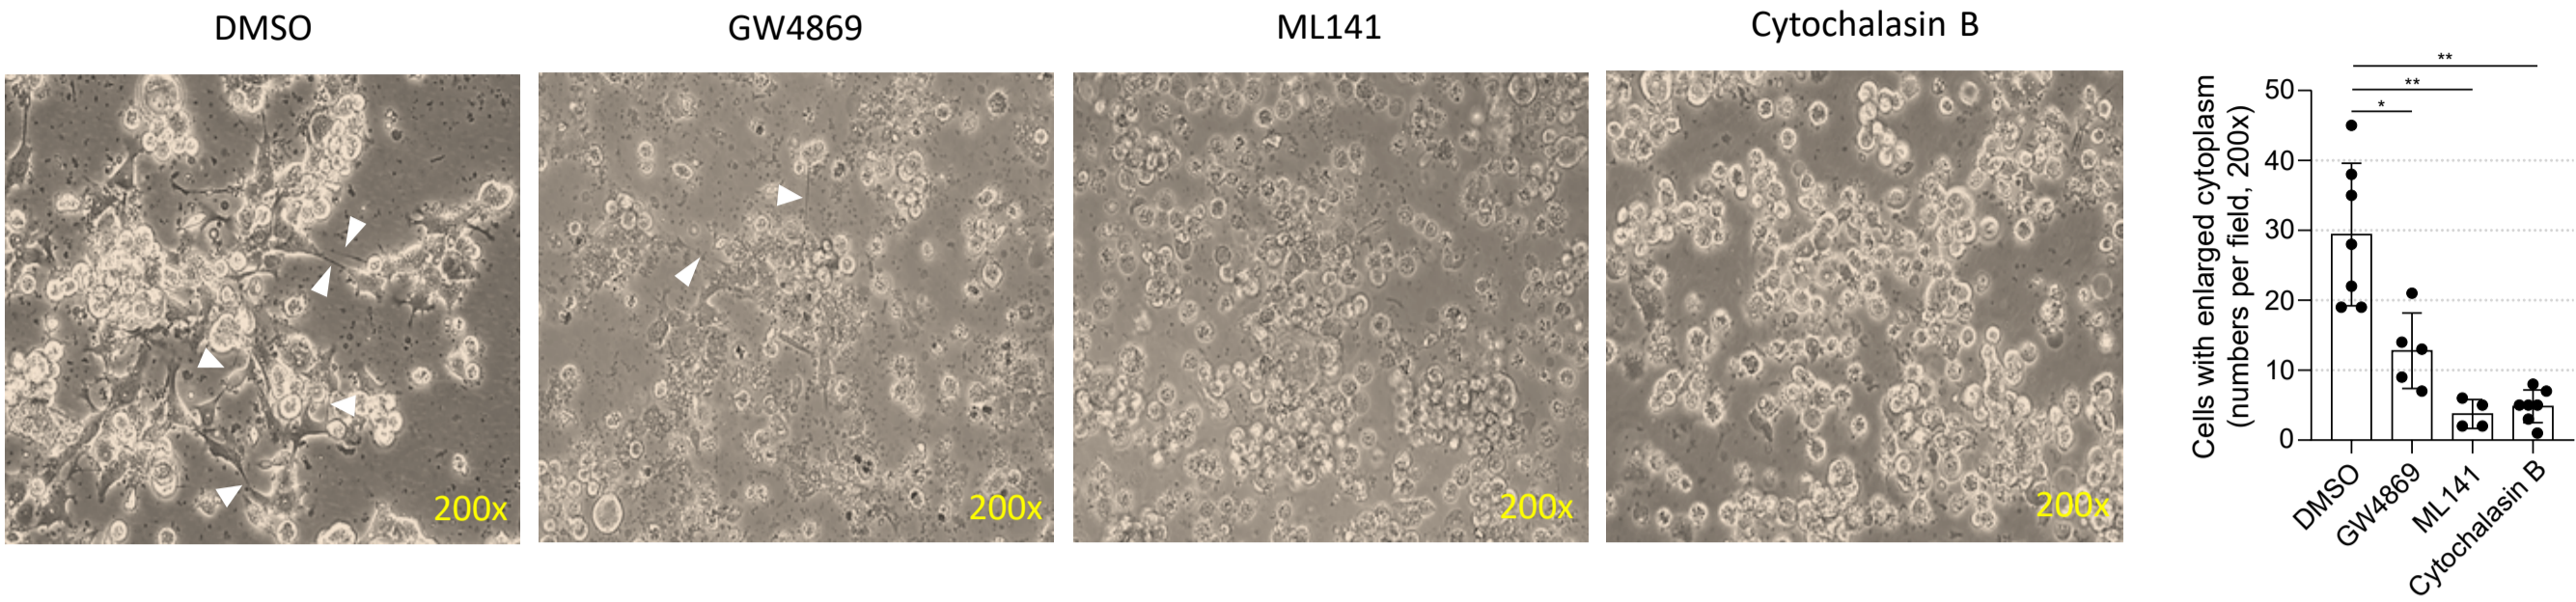

e

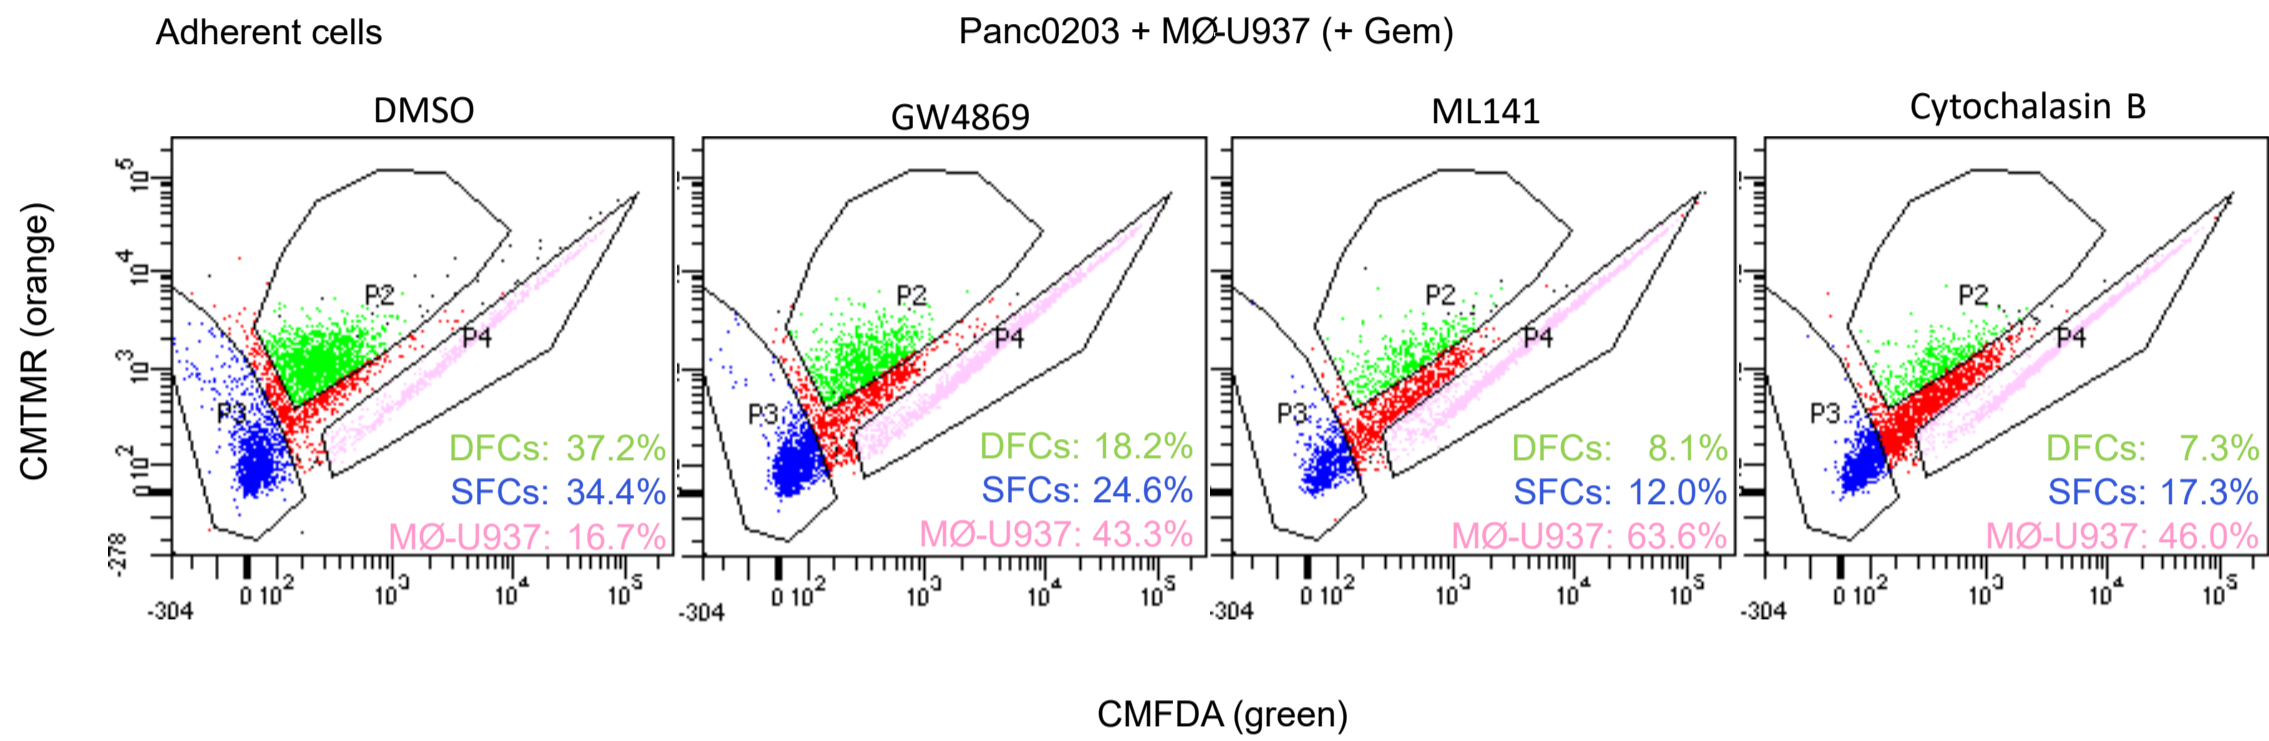

f

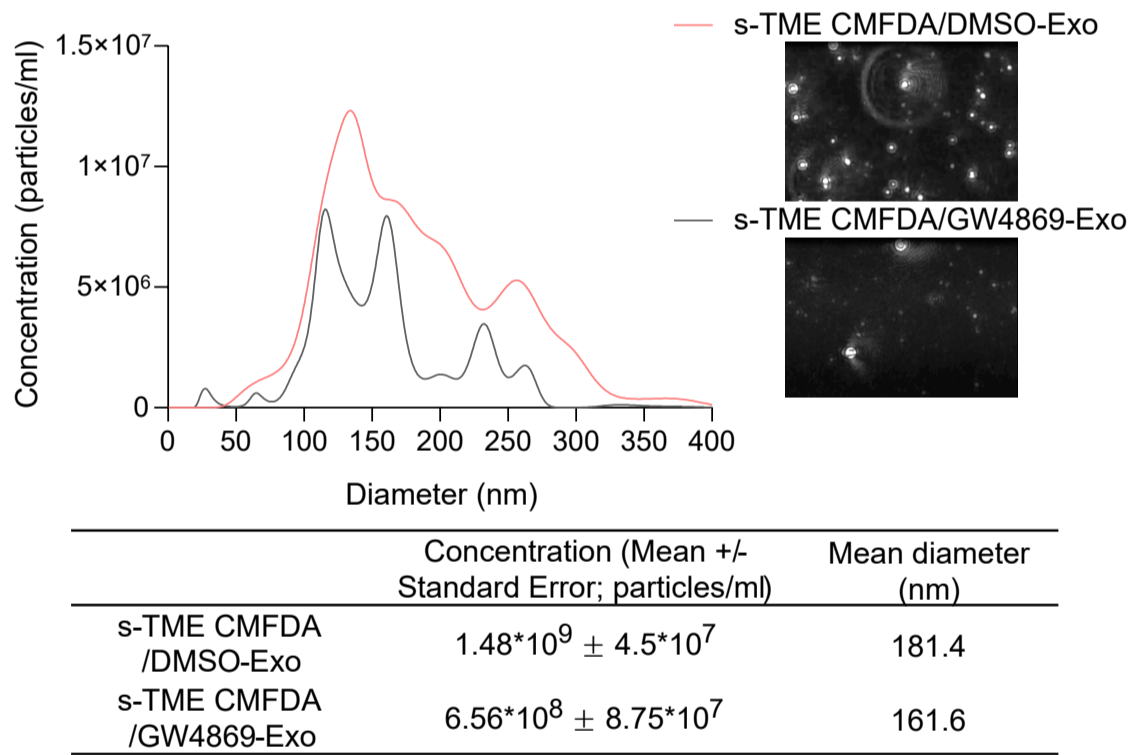

h

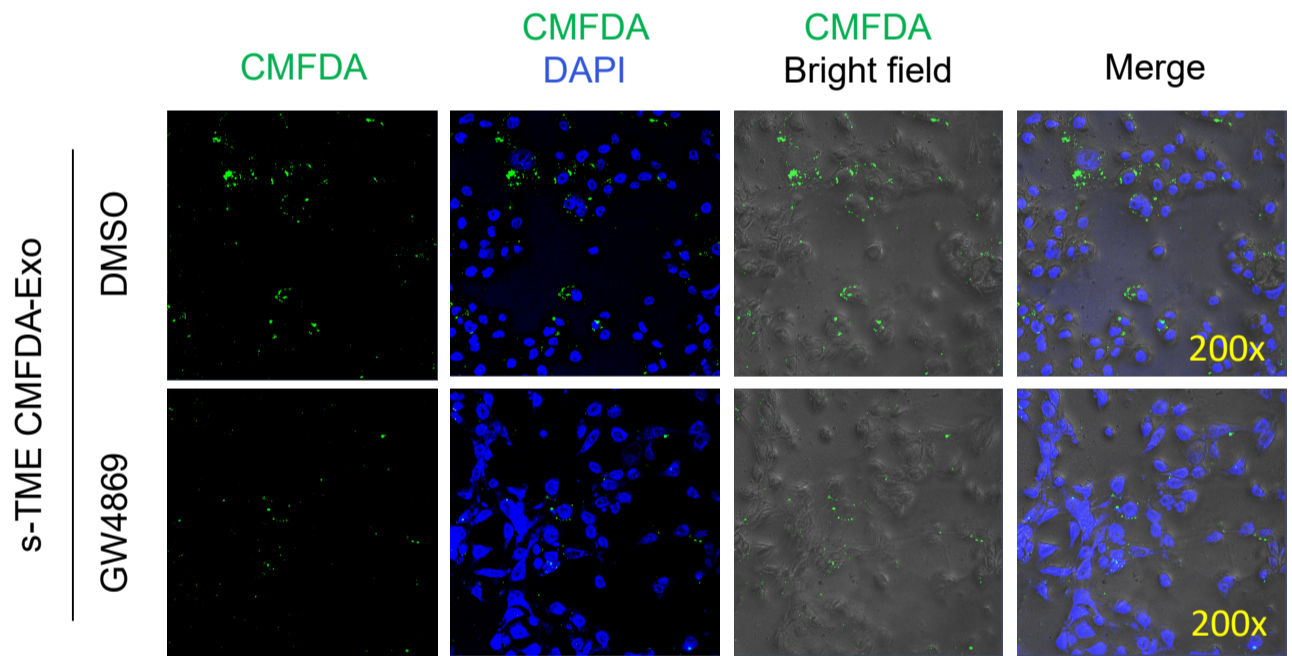

g

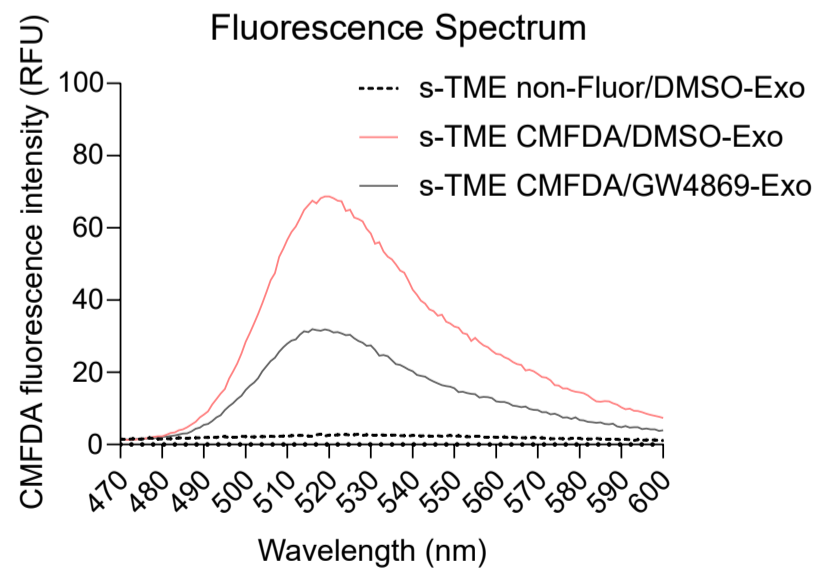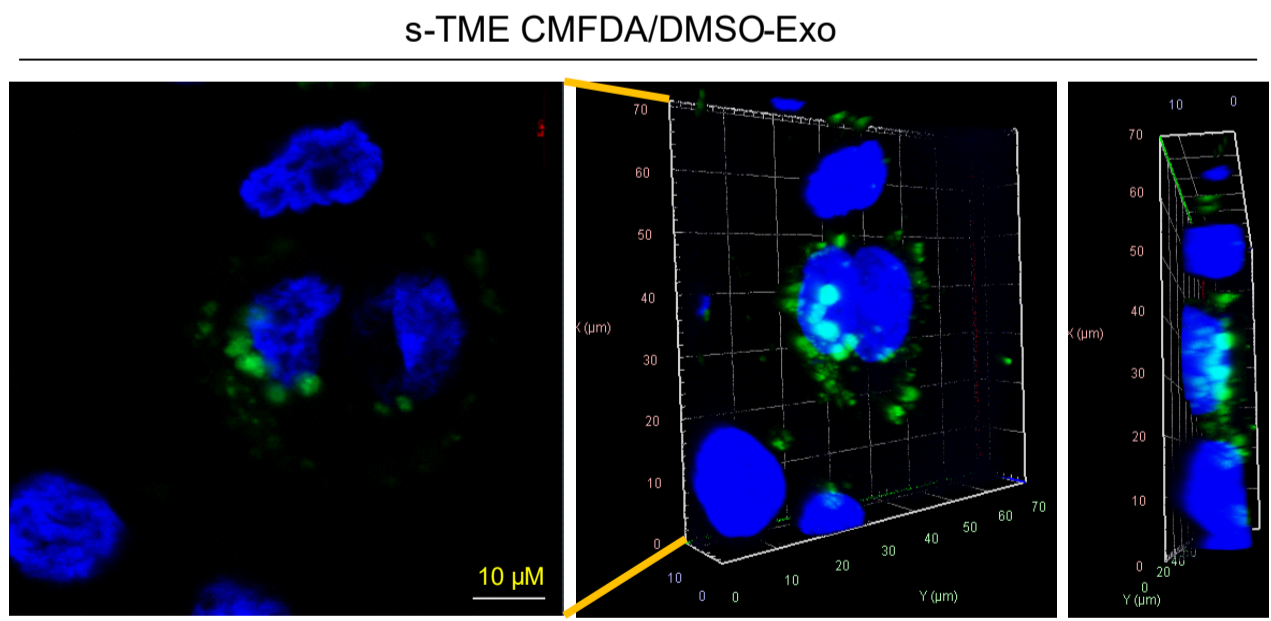

i

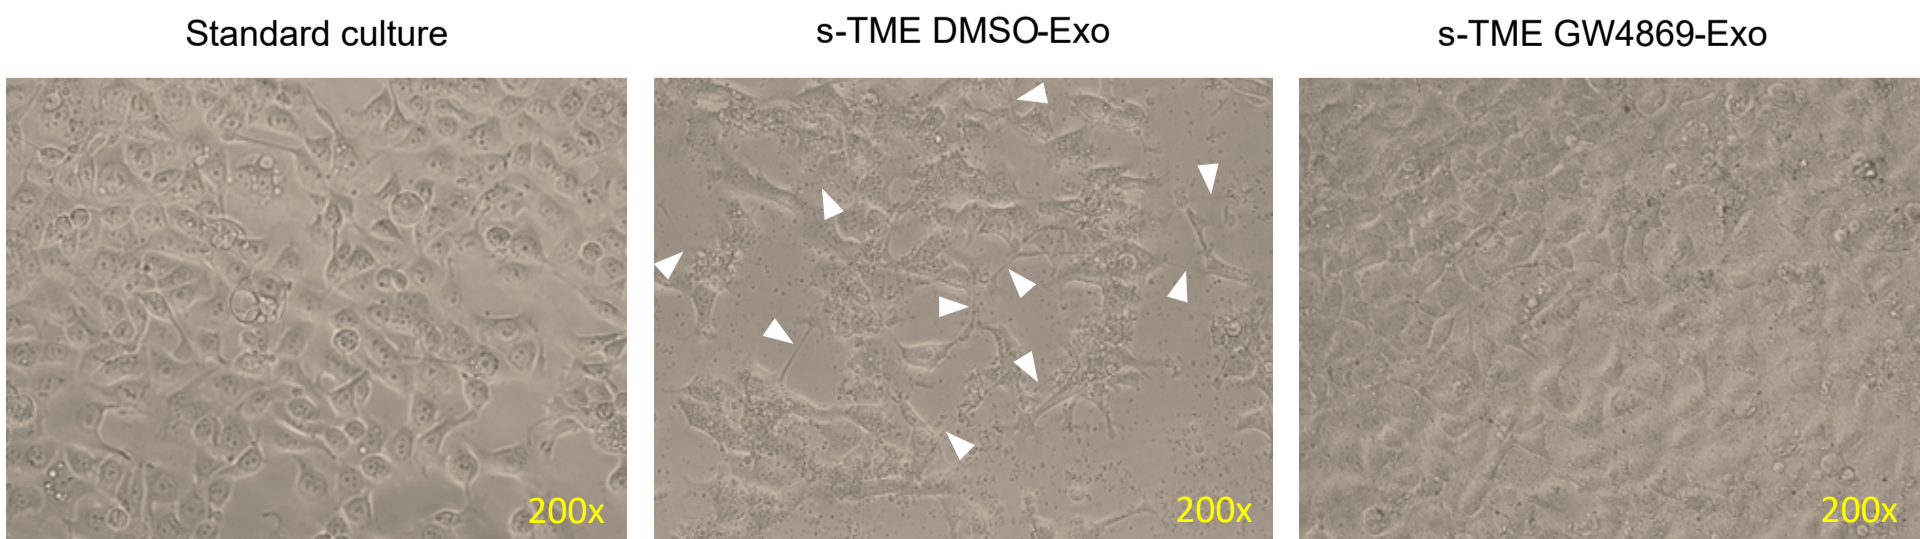

j

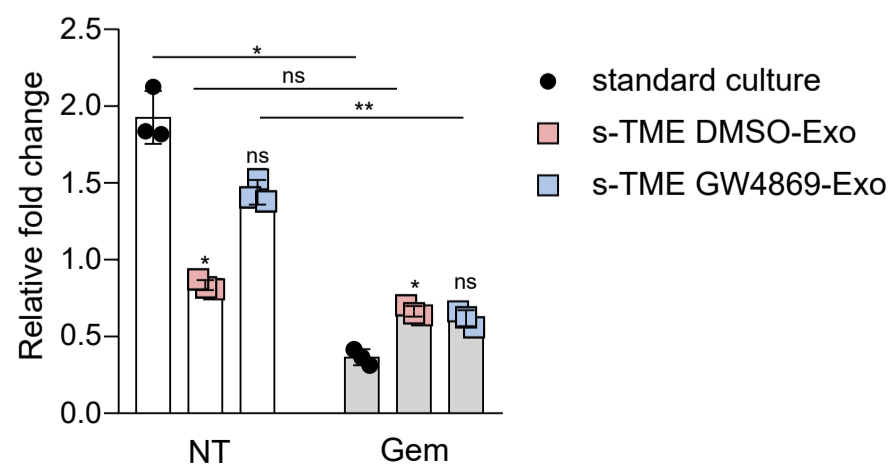

**Supplementary Figure 1. Increased numbers of vacuoles or enlarged cytoplasm following DFCs isolation.** **a** The gating strategy used for DFCs and SFCs sorting. Set up a sorting area for adherent CMFDA/CMTMR double-fluorescence positive cells (DFCs) and for adherent CMTMR single-fluorescence positive cells (SFCs) of the s-TME model. DFCs, which are exclusive against all the other cell populations (MØ-U937<sup>NT</sup>, MØ-U937<sup>CMFDA</sup>, Panc0203<sup>NT</sup> and Panc0203<sup>CMTMR</sup> cells) presented on Fig. 1c-e and Supplementary Fig. 1e. SFCs, which are exclusive against DFCs and MØ-U937<sup>CMFDA</sup> cell populations presented on Fig. 1c, d and Supplementary Fig. 1e. **b** Multiple formation of bulk-bodied regions (yellow bounding boxes) and a stretching-body (a red border box) of pre-SP0926 (isolated DFCs) during a period of low growth rate (right chart) before the SP0926 cell line was established. A close-up view of one of the bulk-bodied areas is displayed in a orange border box. Arrow; migration route of proliferating cells. a', b'; a migrated cell population from a or b. **c** Multiple formation of bulk-bodied regions (yellow bounding boxes) of pre-SP colonies (sorted DFCs) during early period of time before establishment of each SP cell line (SP1030 and SP0913<sup>1A, 1B, 1C</sup>). Close-up views of one of the bulk-bodied areas (orange border boxes). Syncytium (a yellow circle). **d** Observation of the blocking effect of exosome biosynthesis/release and TNT formation on the morphology of Panc0203<sup>CMTMR</sup> and MØ-U937<sup>CMFDA</sup> cells at the final point of the s-TME model before cell collection for flow cytometry. Left, bright-field light microscopy images. Arrow heads indicate TNTs. Right, One-way ANOVA test. \*  $P \leq 0.05$ ; \*\*  $P \leq 0.01$ . **e** The percentage of DFCs from the adherent cells exposed to the inhibitors (GW4869, ML141 or Cytochalasin B) in s-TME model. Flow cytometry data. 10  $\mu$ M GW4869, 10  $\mu$ M ML141 and 100 nM Cytochalasin B. **f** Nanoparticle Tracking Analysis (NTA) of purified exosomes. NTA was performed at 25°C. Concentration (Mean  $\pm$  Standard Error; particles/ml). Mean diameter (nm). s-TME CMFDA/DMSO-Exo (purified exosomes from conditioned media of CMFDA/DMSO-treated s-TME model), s-TME CMFDA/GW4869-Exo (purified exosomes from conditioned media of CMFDA/GW4869-treated s-TME model). **g** Quantification of exosome fluorescence intensity. CMFDA (Ex/Em: 492/517 nm) fluorescence signal quantification was performed and the spectrum is presented within 470-600 nm range. s-TME non-fluor/DMSO-Exo (purified exosomes from conditioned media of non-fluorescent/DMSO-treated s-TME model), s-TME CMFDA/DMSO-Exo (purified exosomes from conditioned media of CMFDA/DMSO-treated s-TME model), s-TME CMFDA/GW4869-Exo (purified exosomes from conditioned media of CMFDA/GW4869-treated s-TME model). **h** Confocal images of exosome-transferred cells (Green spots: s-TME CMFDA/DMSO-Exo or s-TME CMFDA/GW4869-Exo). Confocal images of Panc0203 after s-TME CMFDA/DMSO-Exo treatment for 20 h. Z-stack views in the same field: scale bar, 10  $\mu$ m. **i** Bright-field light microscopy images of normal Panc0203 cells and the Panc0203 cells exposed to s-TME DMSO-Exo (purified exosomes from conditioned media of DMSO-treated s-TME model) or s-TME GW4869-Exo (purified exosomes from conditioned media of GW4869-treated s-TME model) for 20 h. Arrow heads indicate TNTs. **j** Proliferation and viability was observed 24 h after s-TME DMSO-Exo or s-TME GW4869-Exo treatment. The reference value for calculating the relative fold change is the value obtained at 0 h control in Panc0203 cells. Gemcitabine (250  $\mu$ M). \*  $P \leq 0.05$ ; \*\*  $P \leq 0.01$ . One-way ANOVA test. Data are presented as the mean values  $\pm$  standard deviation (SD).

a

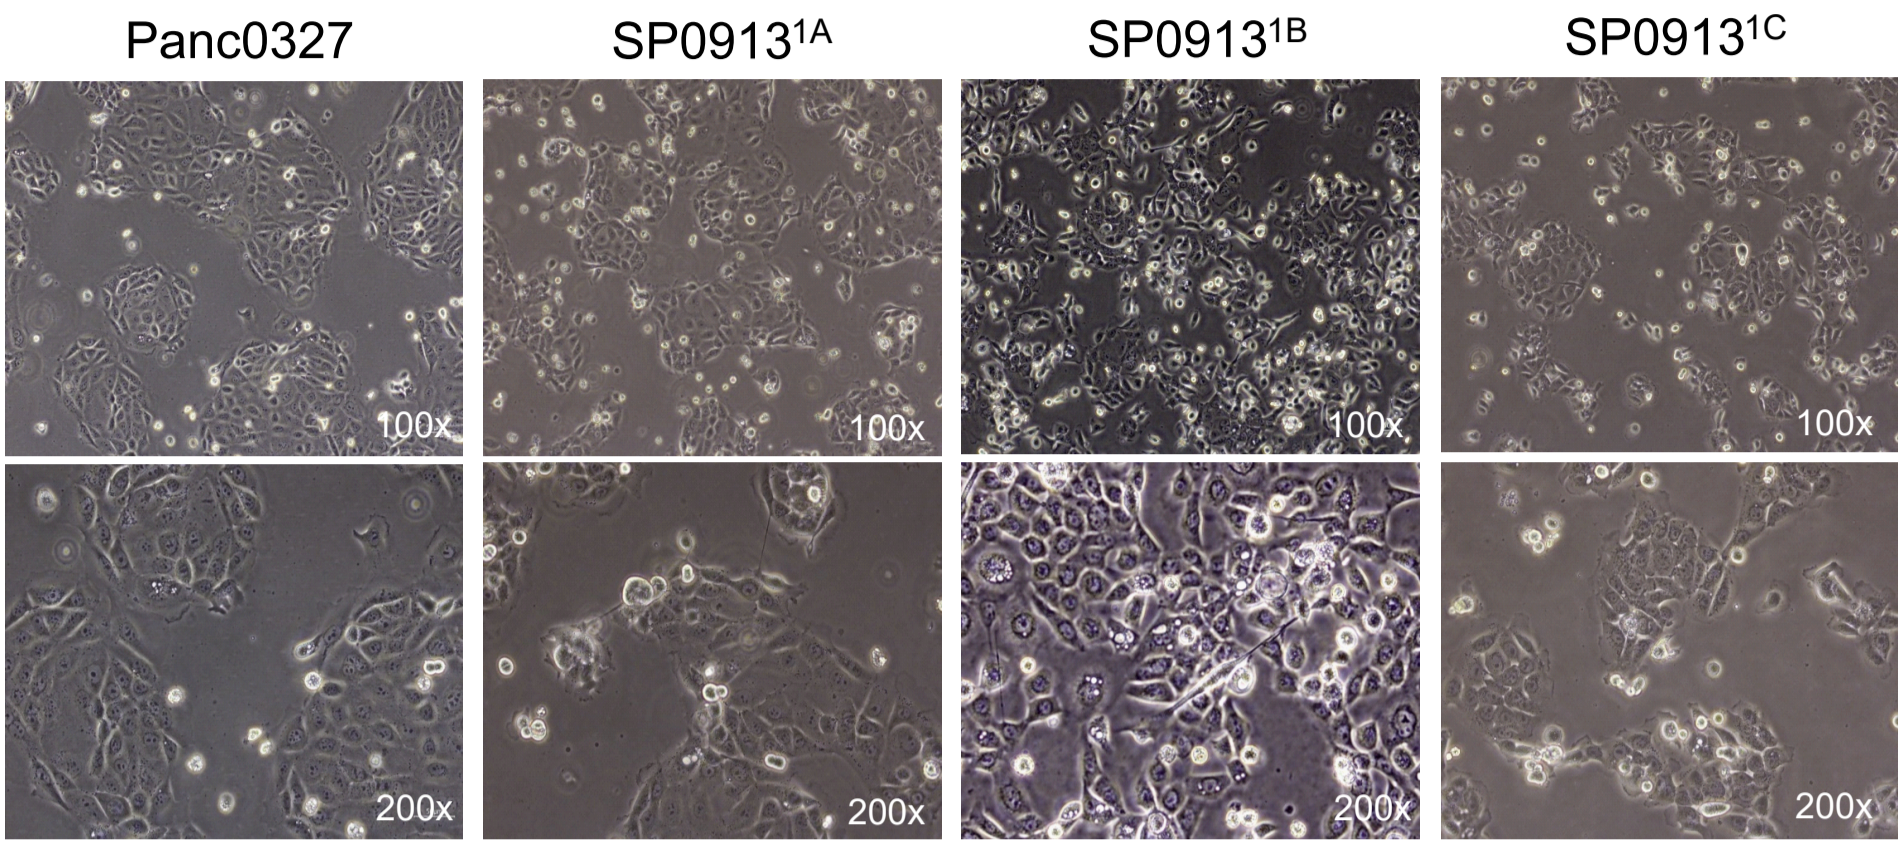

c

SP0926\_SVs compared to Panc0203

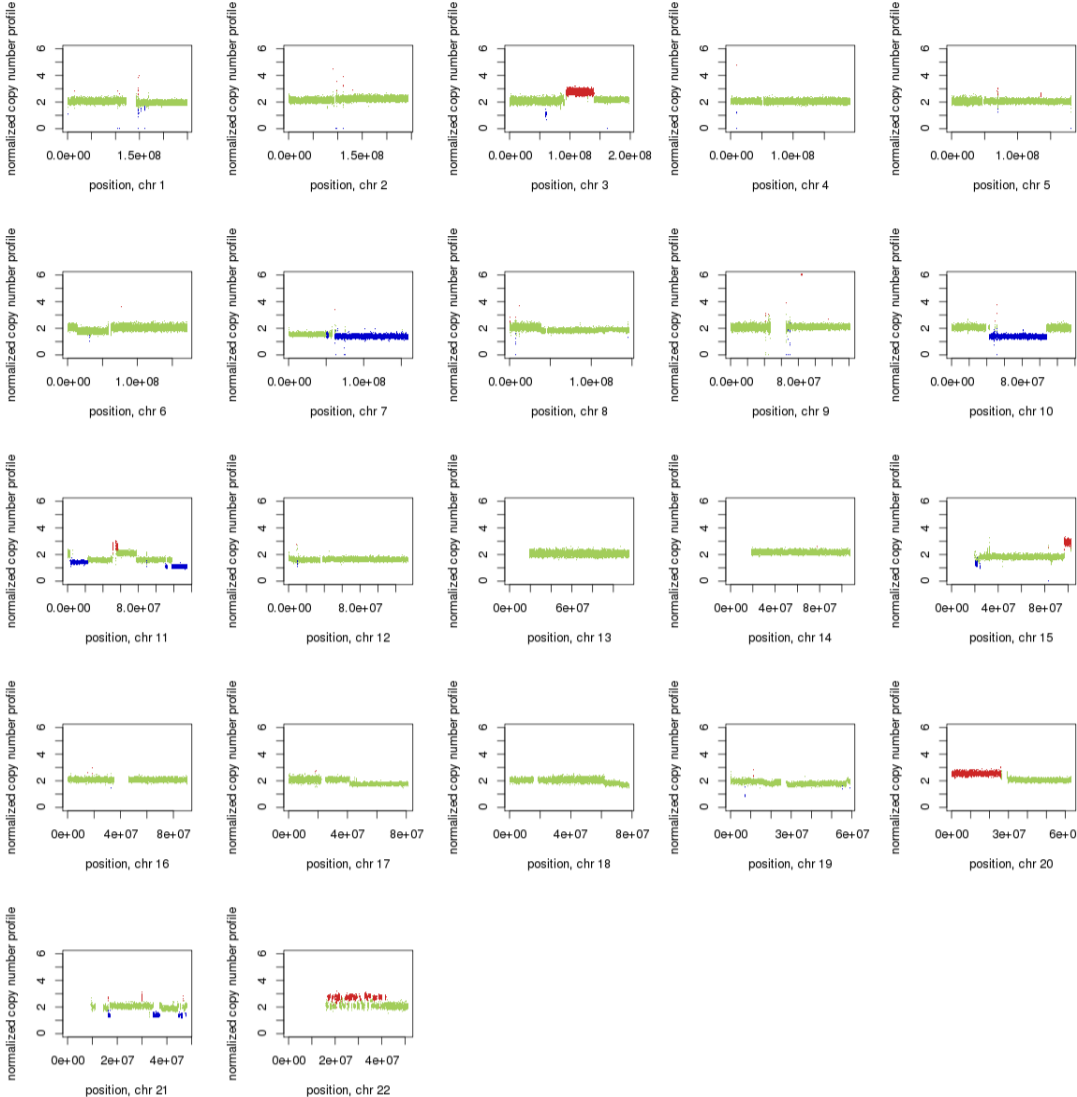

SP1030\_SVs compared to Panc0203

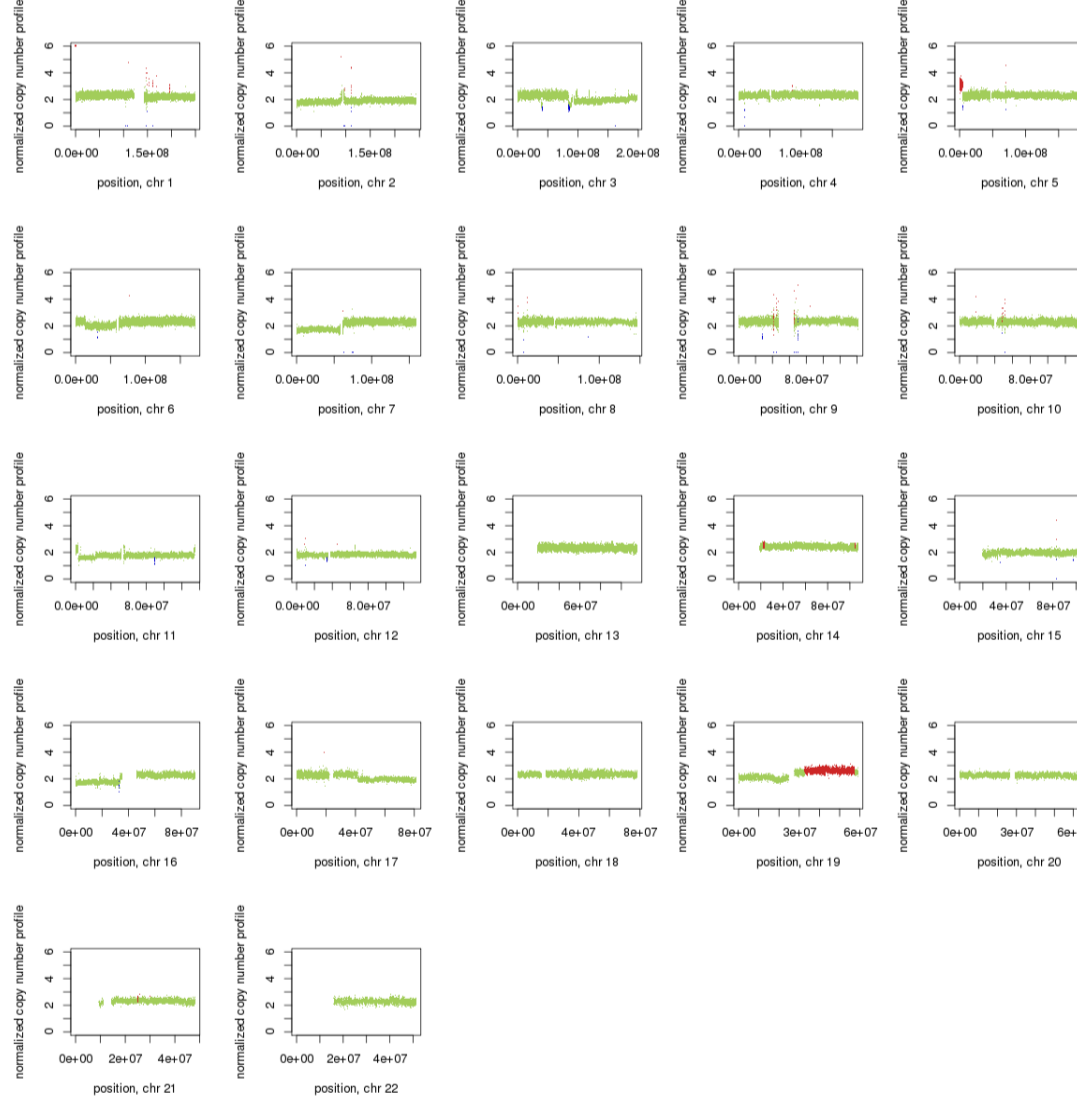

b

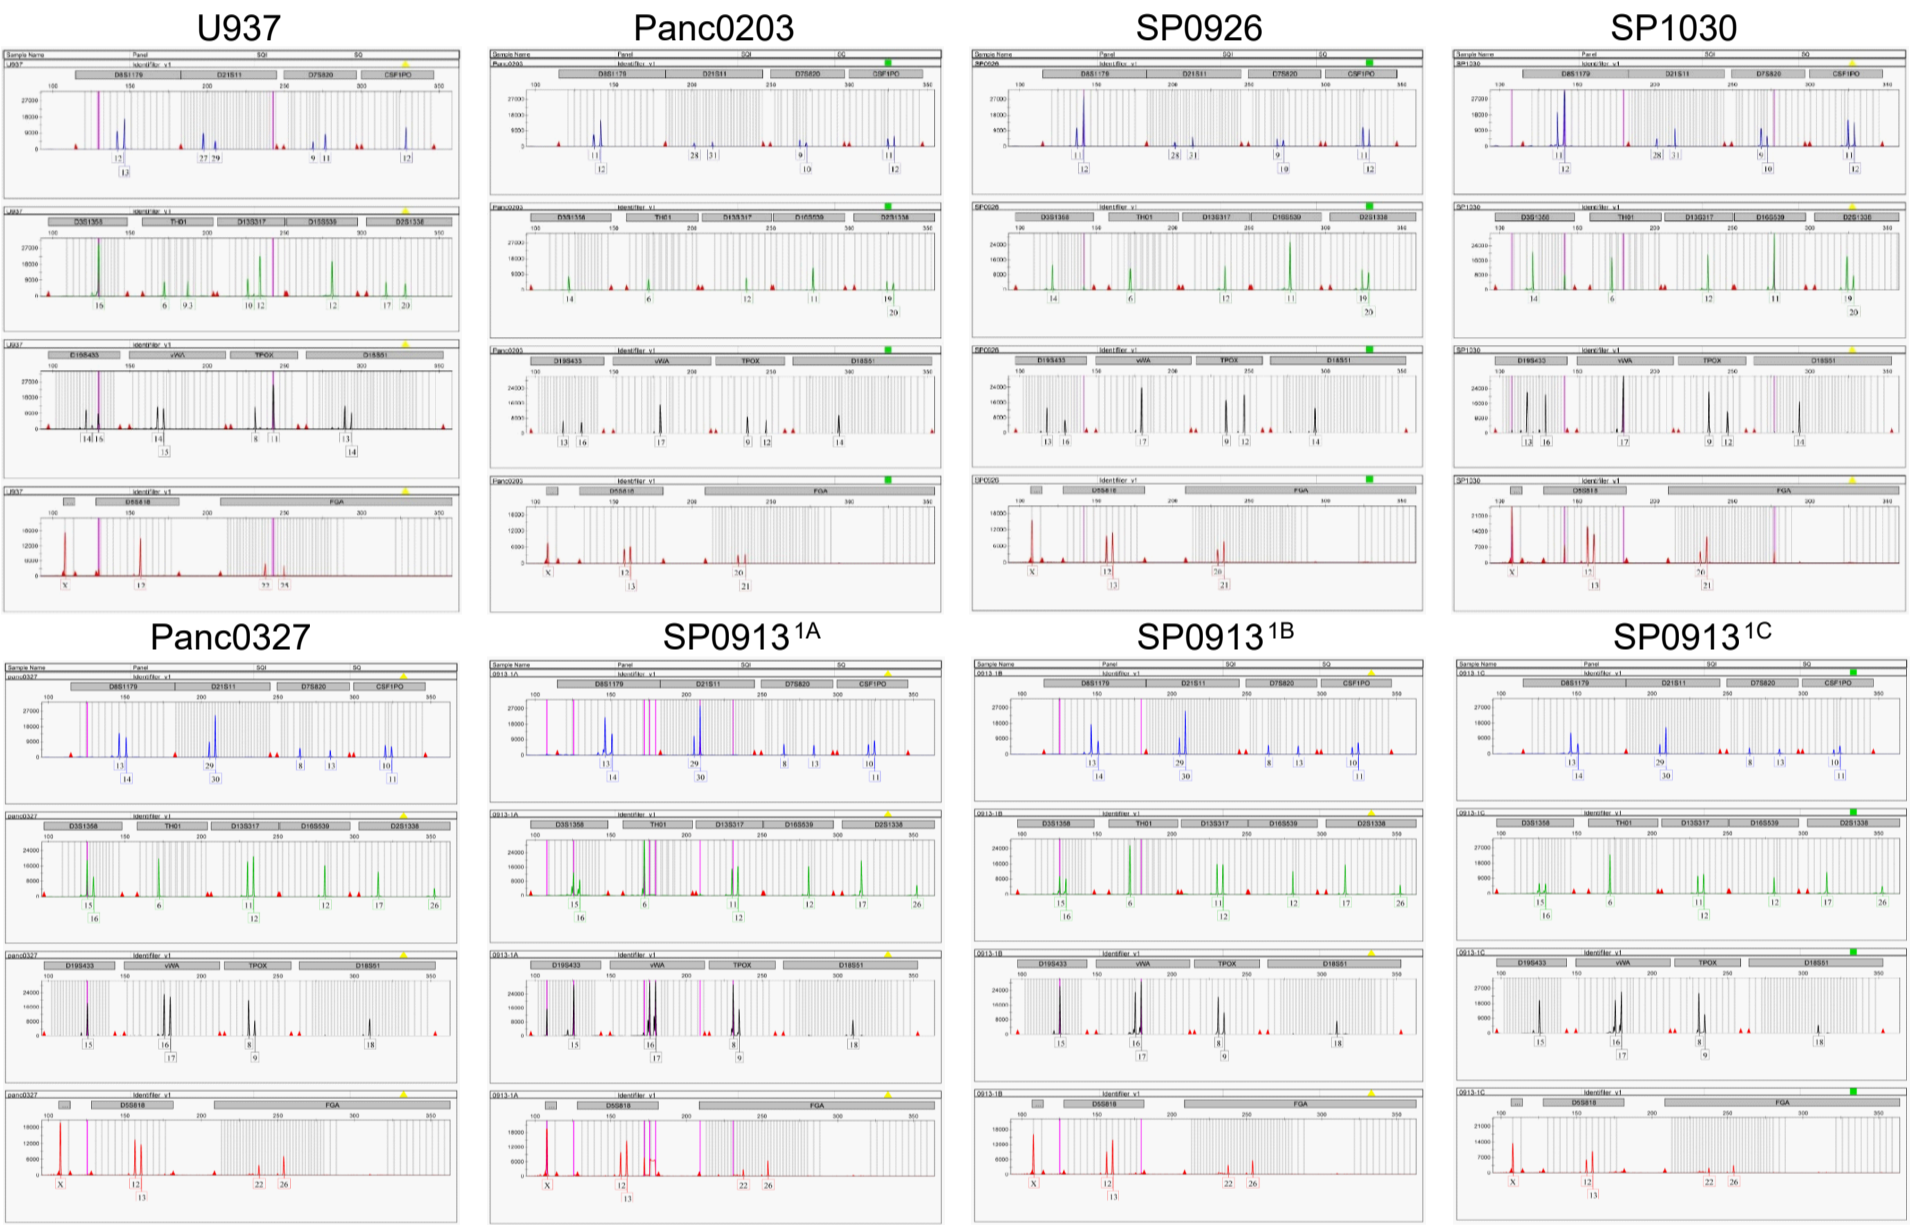

D

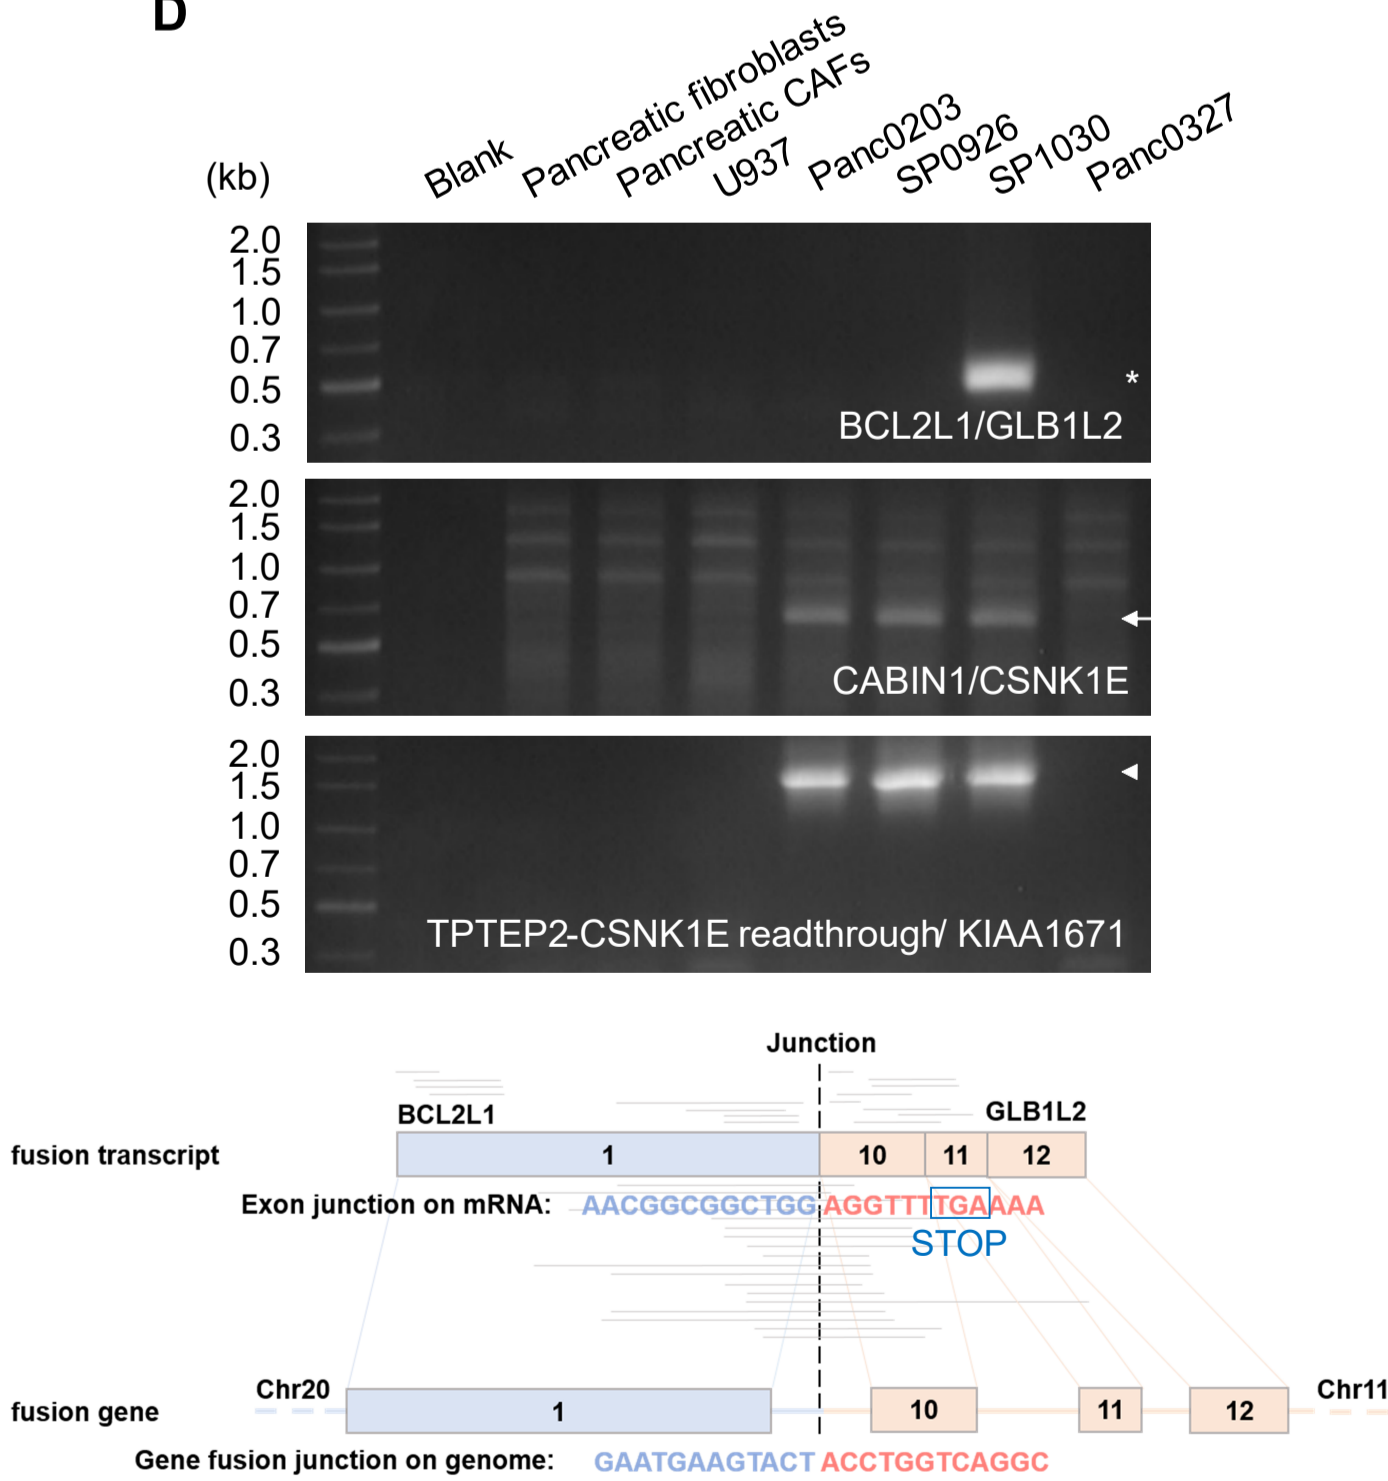

**Supplementary Figure 2. Genome characterization of pancreatic derivative cells from direct cell-to-cell transfer.** **a** Representative morphologic and spatial patterns of Panc0327 cells and derivative cell lines. Phase images show a less dispersed growth pattern of SP0913<sup>1B</sup> cells compared to that of Panc0327, SP0913<sup>1A</sup>, and SP0913<sup>1C</sup> cells. **b** STR profile was detected by primers that amplified the 15 STR loci and the gender marker Amelogenin. **c** Copy number alterations (Red: gains; Blue: losses) of derivative cells (SP0926 and SP1030 cells) compared to Panc0203. **d** A novel interchromosomal (chr20-chr11) BCL2L1/GLB1L2 (BG) fusion gene of SP1030 was identified (upper). Positive fusion gene controls for Panc0203, SP0926 and SP1030; CABIN1/CSNK1E and TPTEP2-CSNK1E readthrough/KIAA1671 fusion genes, asterisk; BCL2L1/GLB1L2 fusion gene, arrow; CABIN1/CSNK1E fusion gene, arrow head; TPTEP2-CSNK1E readthrough/KIAA1671 fusion gene. BCL2L1-GLB1L2 fusion junction on genomic DNA and mRNA of SP1030 (bottom).

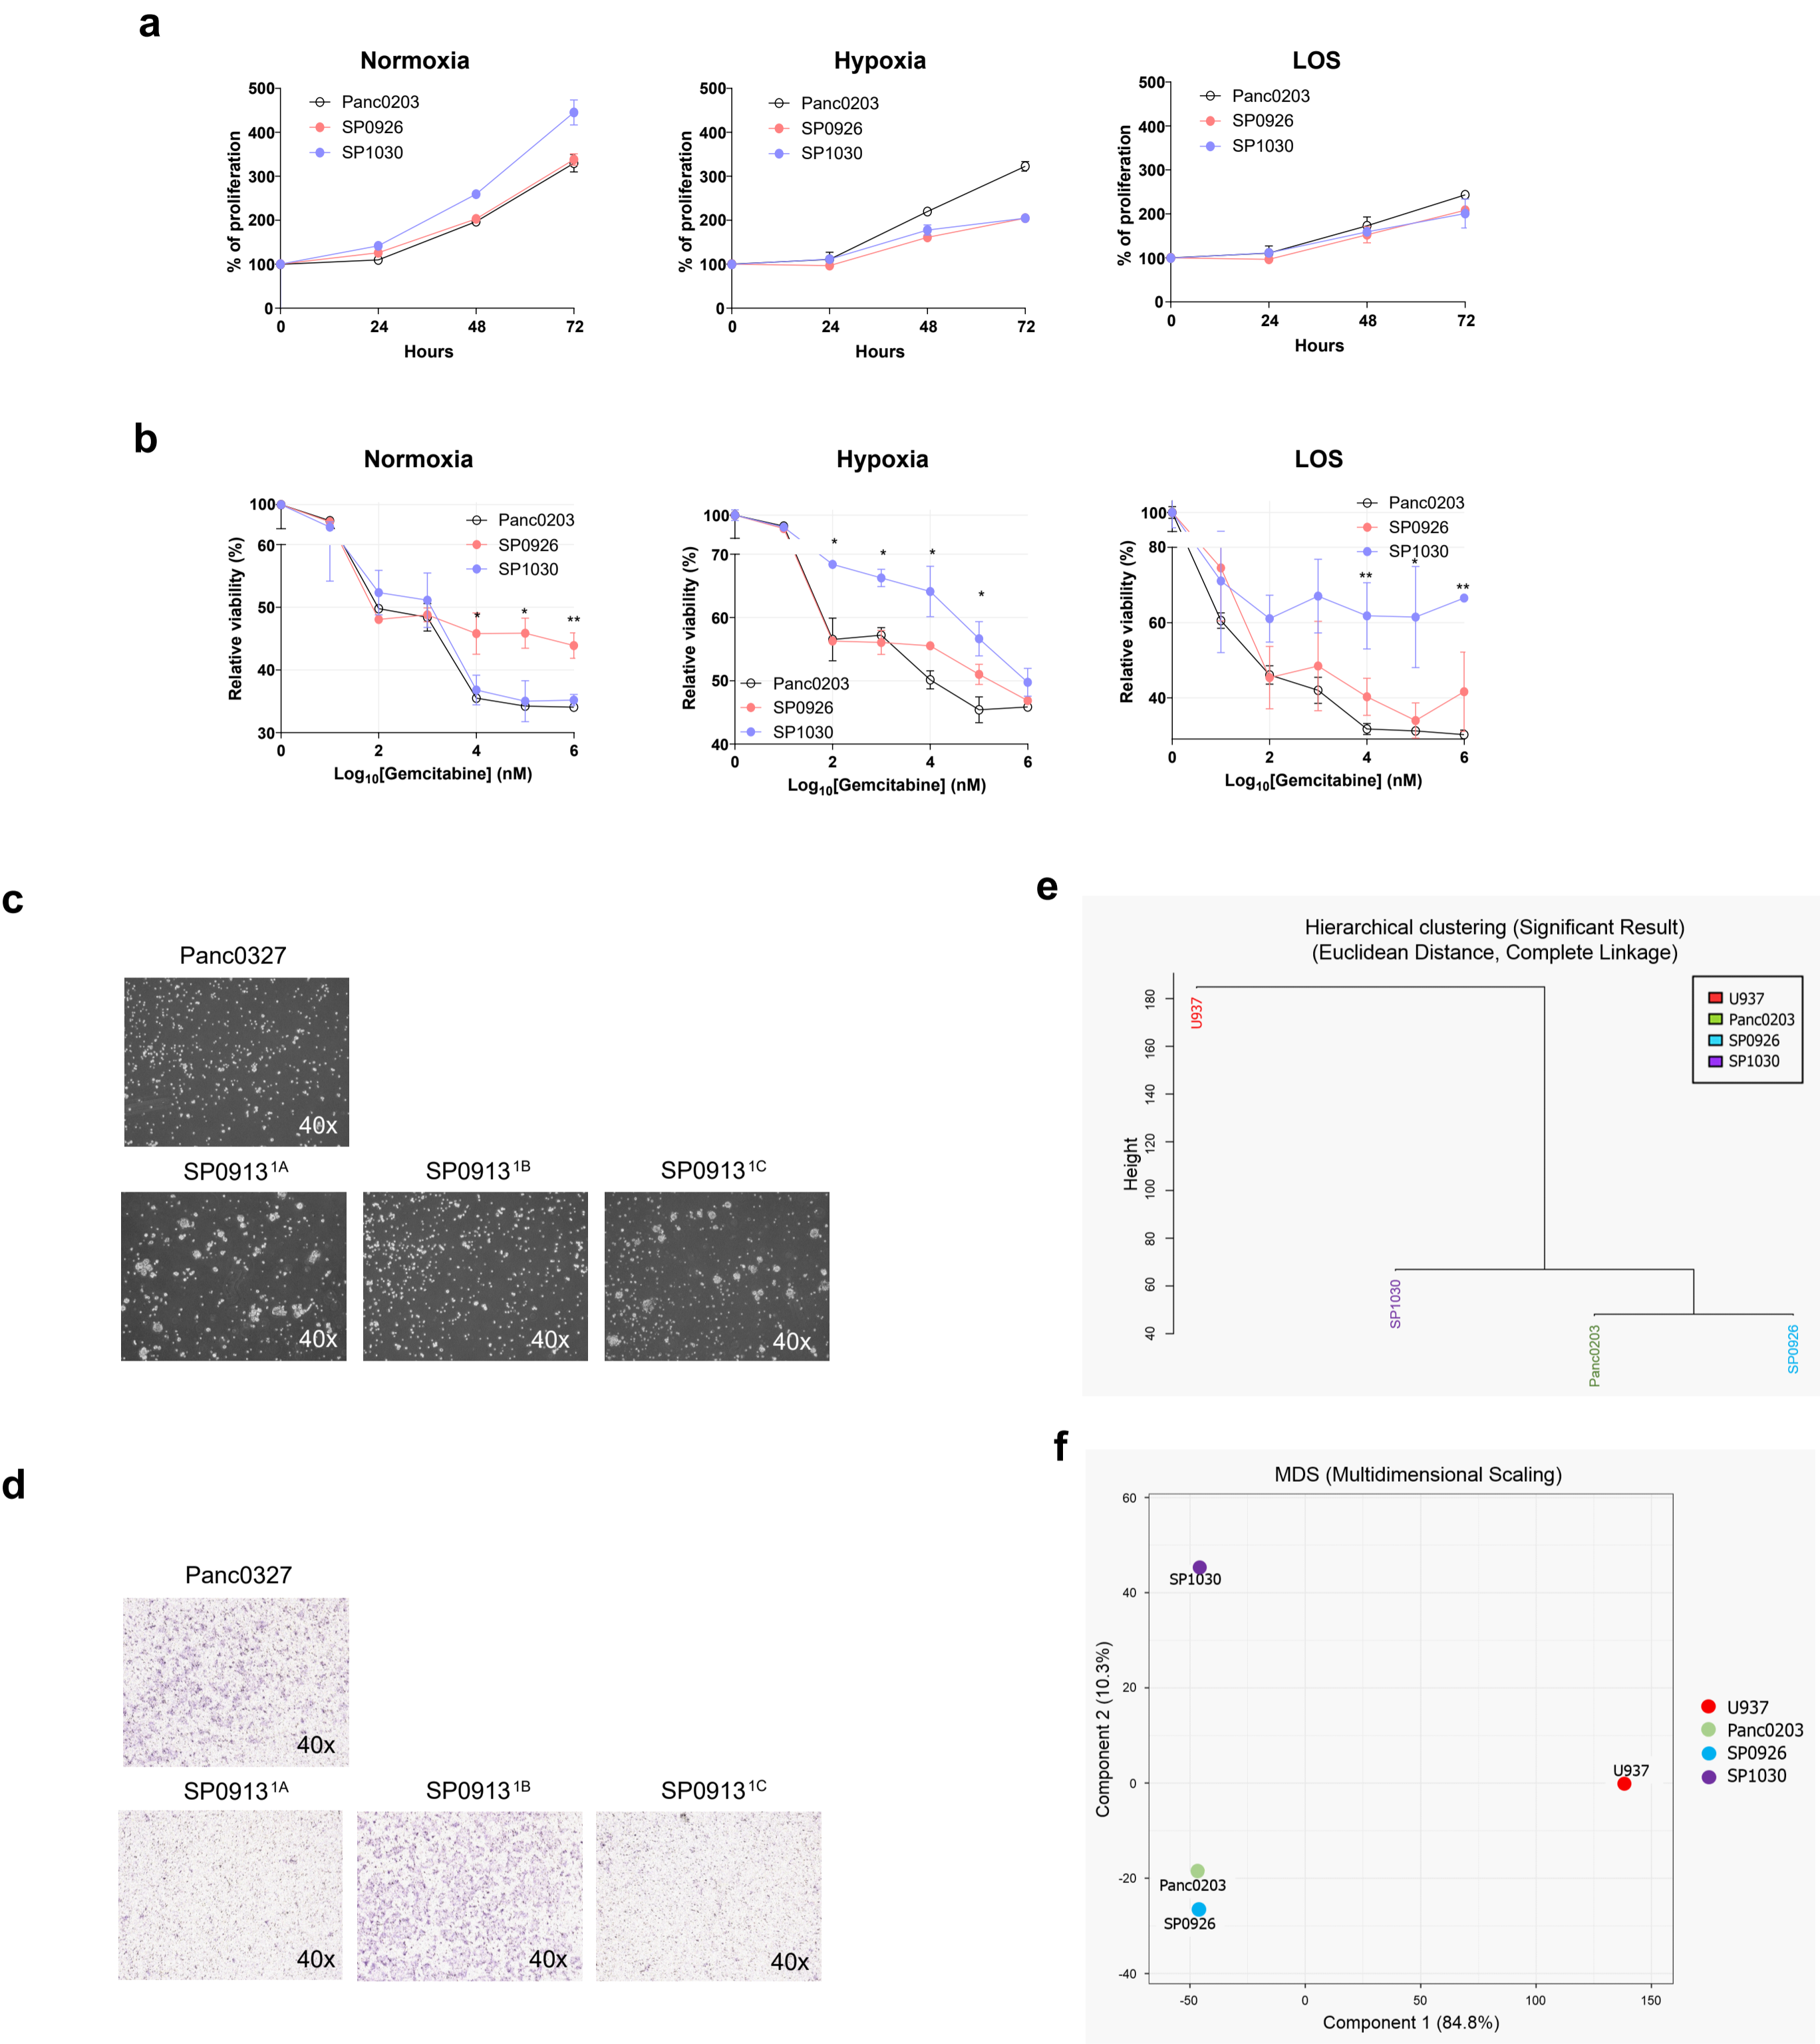

**Supplementary Figure 3. Enhanced tumorsphere formation or invasive activity of pancreatic derivative cells from direct cell-to-cell transfer.** **a, b** Proliferation under a gemcitabine free culture condition (**a**) and viability against gemcitabine at 48 h (**b**), together with normoxic, hypoxic, or low oxygen and serum (LOS) condition. \*  $P \leq 0.05$ ; \*\*  $P \leq 0.01$ ; \*\*\*  $P \leq 0.001$ . One-way ANOVA followed by Tukey's multiple comparison test. Data are represented as the mean value  $\pm$  SD. **c** Representative images of tumorsphere formation in Panc0327 and derivative cells. Spheroids were evaluated on day 7 after seeding. **d** Invasion activity of Panc0327 cells and derivative cells. An invasion chamber assay system containing Matrigel was performed for 24 h. The initial seeding number of cells for each group was  $1 \times 10^5$ . Upper chamber: serum-free medium, bottom chamber: normal culture medium. **e, f** Hierarchical clustering and multidimensional scaling of RNA sequencing data of pancreatic derivative cancer cells established via direct cell-to-cell transfer. In each sample, the Log<sub>2</sub> (FPKM + 1) value was used to express the similarity between samples for (**e**) hierarchical clustering and (**f**) multidimensional scaling to represent the variability between each cell line in two-dimensional space comprising two components. Data are presented as the mean values  $\pm$  SD.

a

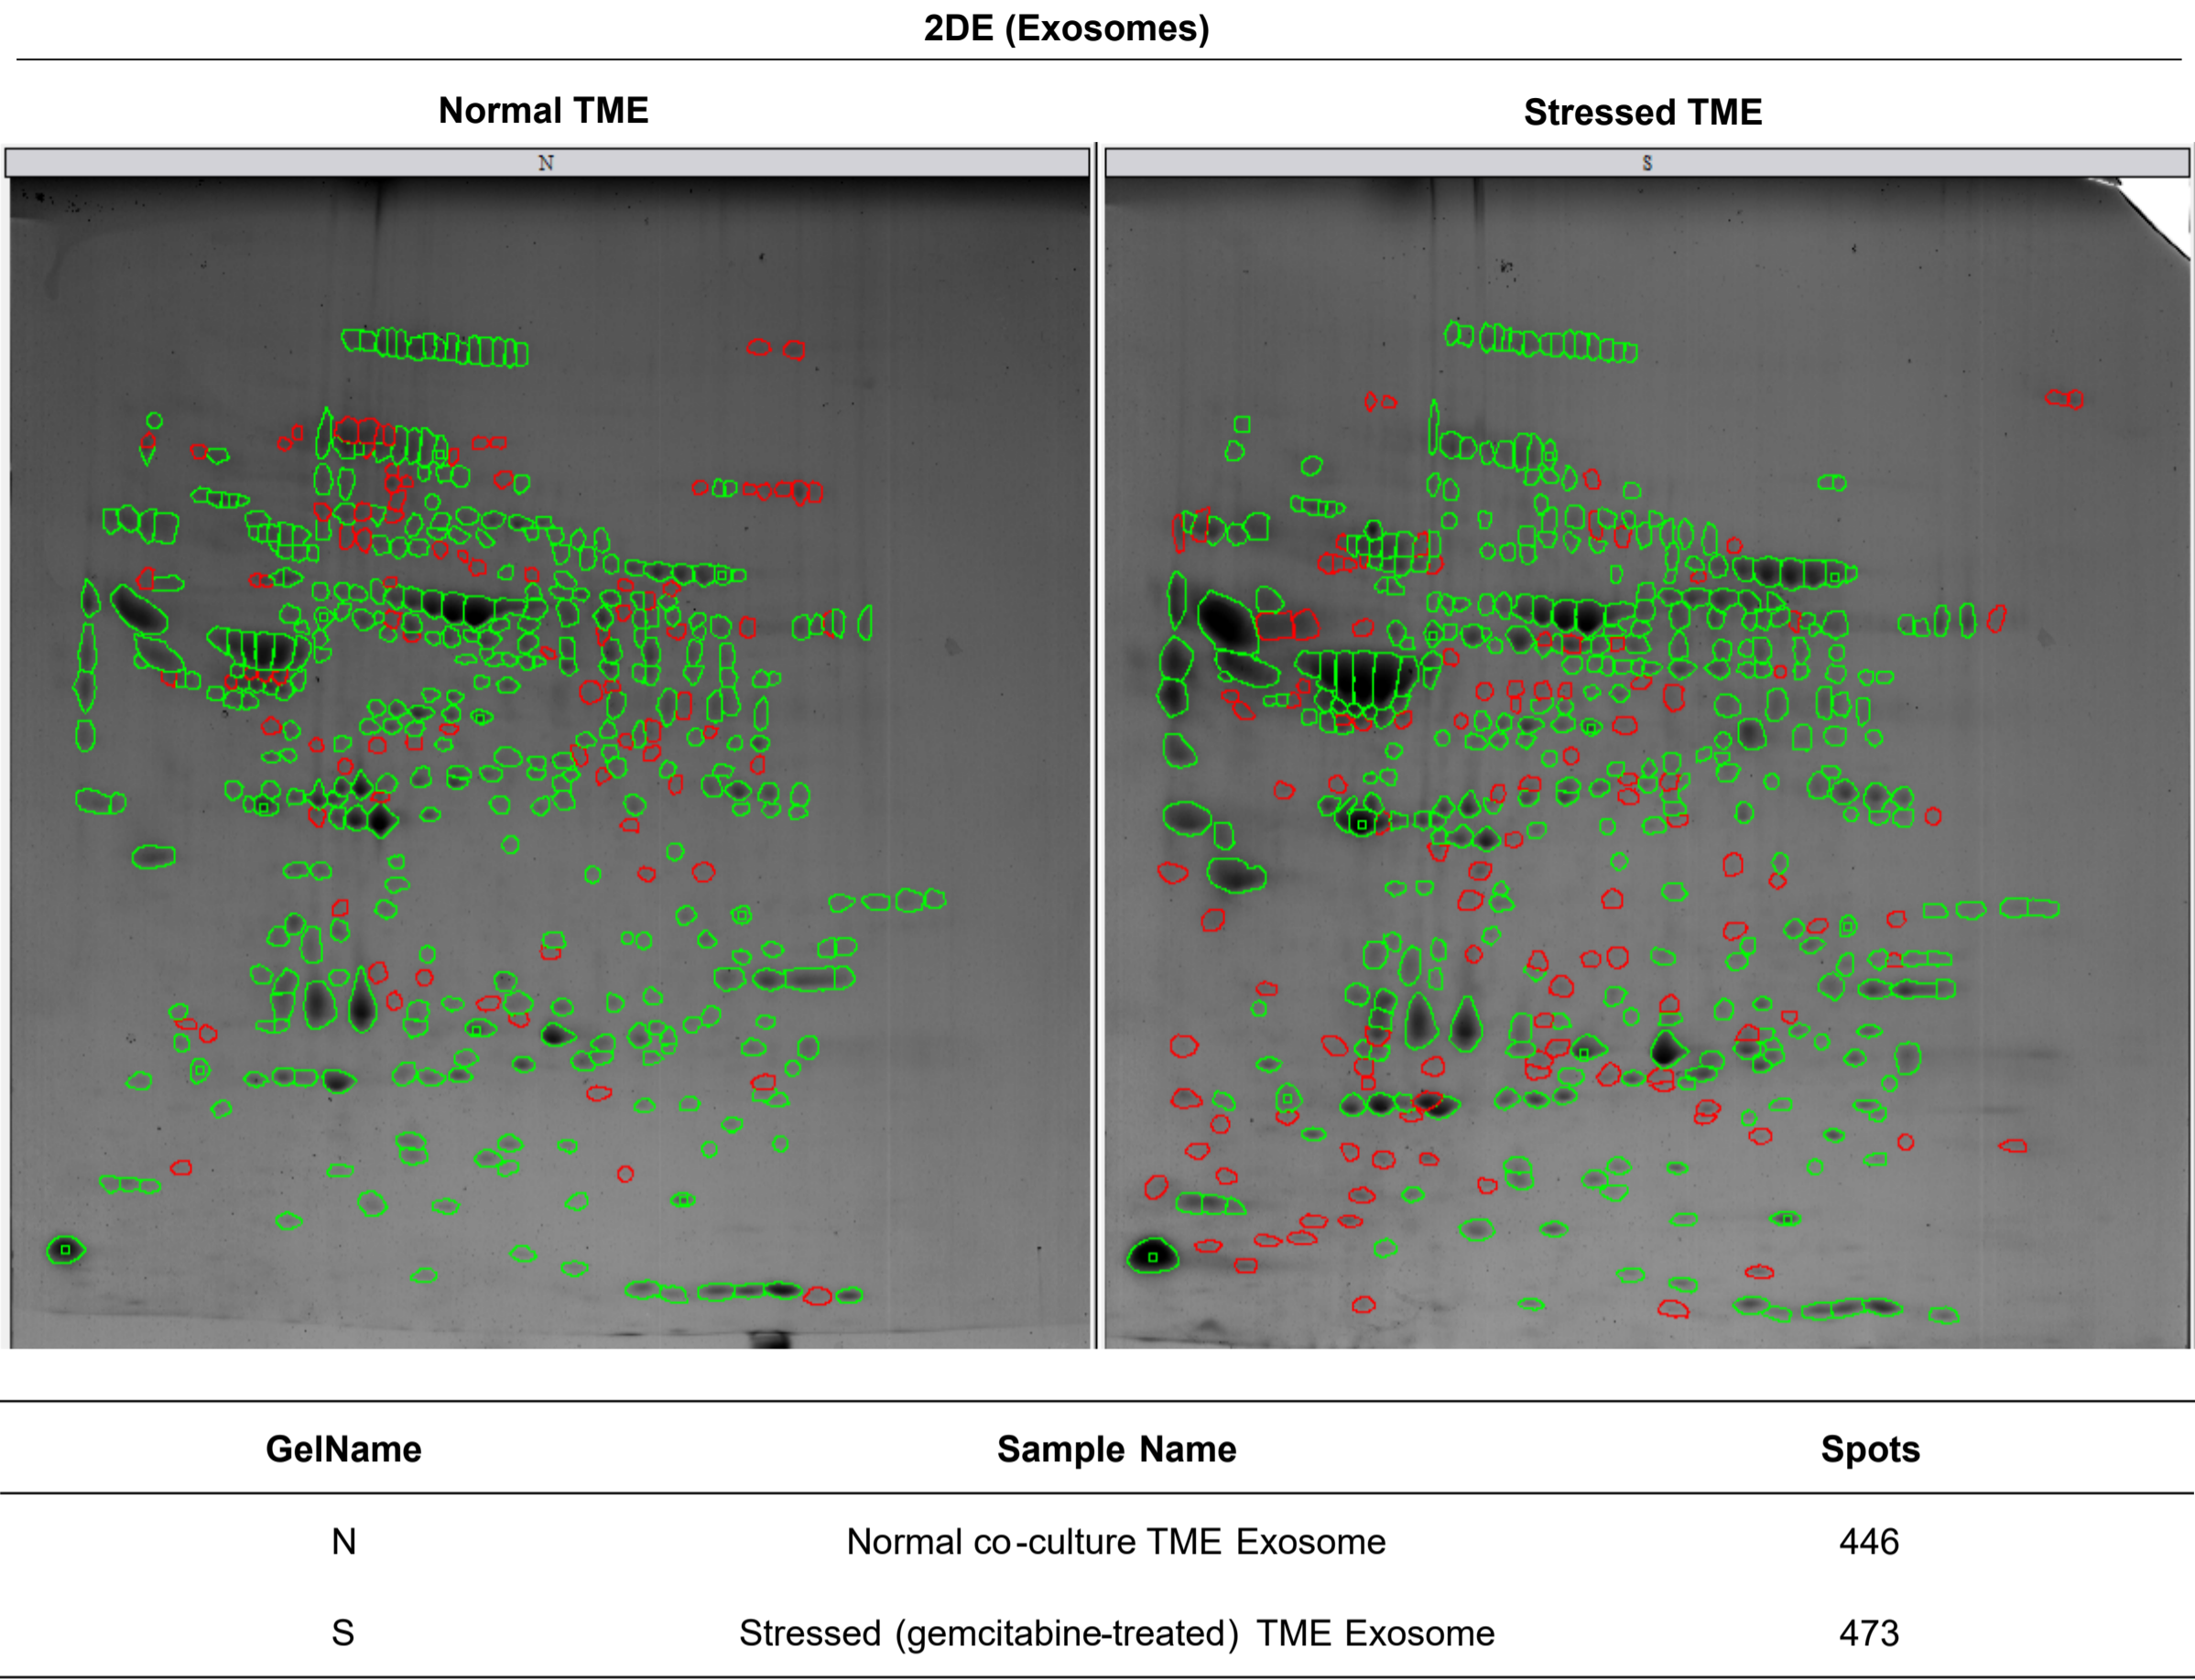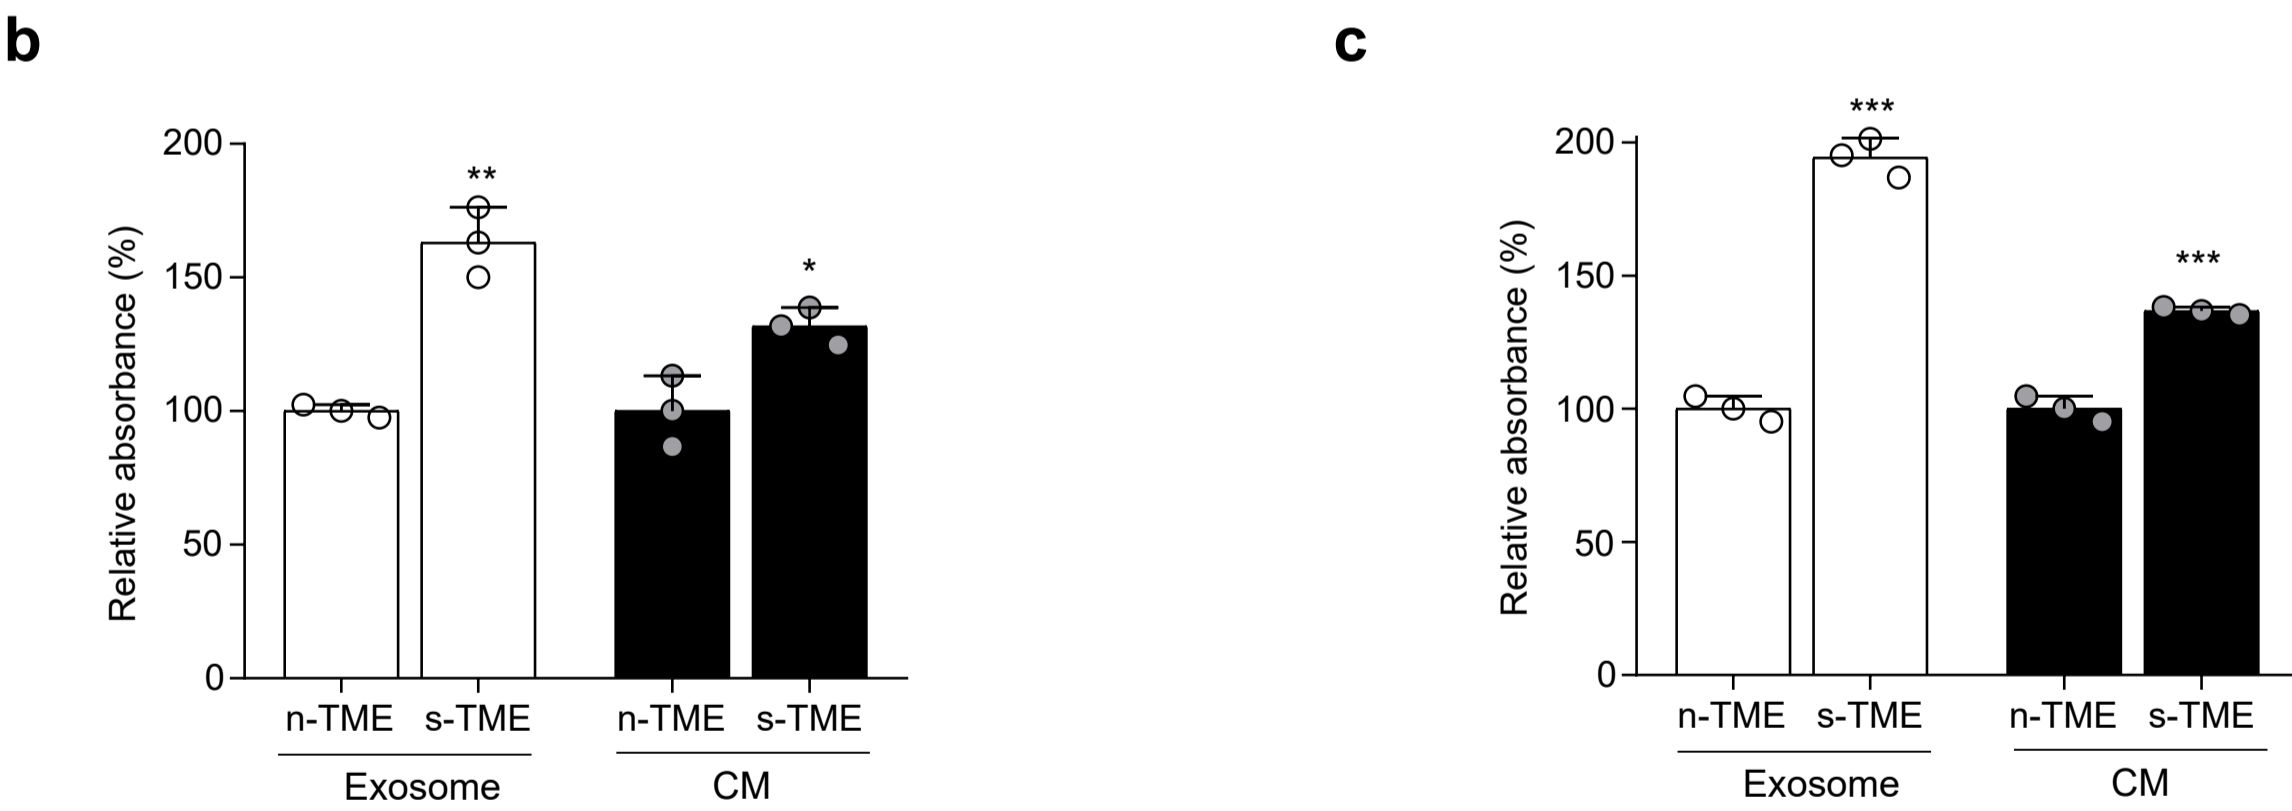

**Supplementary Figure 4. Proteomic analysis of TME-derived exosomes.** **a** A total of 27 spots (S/N ratio: >2x up in S-gel) were identified out of 356 commonly found spots (paired groups; green circles), then a total of 17 groups in descending order was selected as a MALDI candidate group. Among 117 non-paired S-gel spots (red circles), top 5 spots as MALDI candidates were selected by considering the volume descending order. **b, c** Stratifin (**b**) and LGALS3BP (**c**) levels were measured from exosomes and conditioned media (CMs) by ELISA. n-TME; normal co-culture TME condition, s-TME; Stressed (gemcitabine-treated) TME condition. \*, P < 0.05; \*\*, P < 0.01; \*\*\*, P < 0.001. Data are presented as the mean values ± SD.

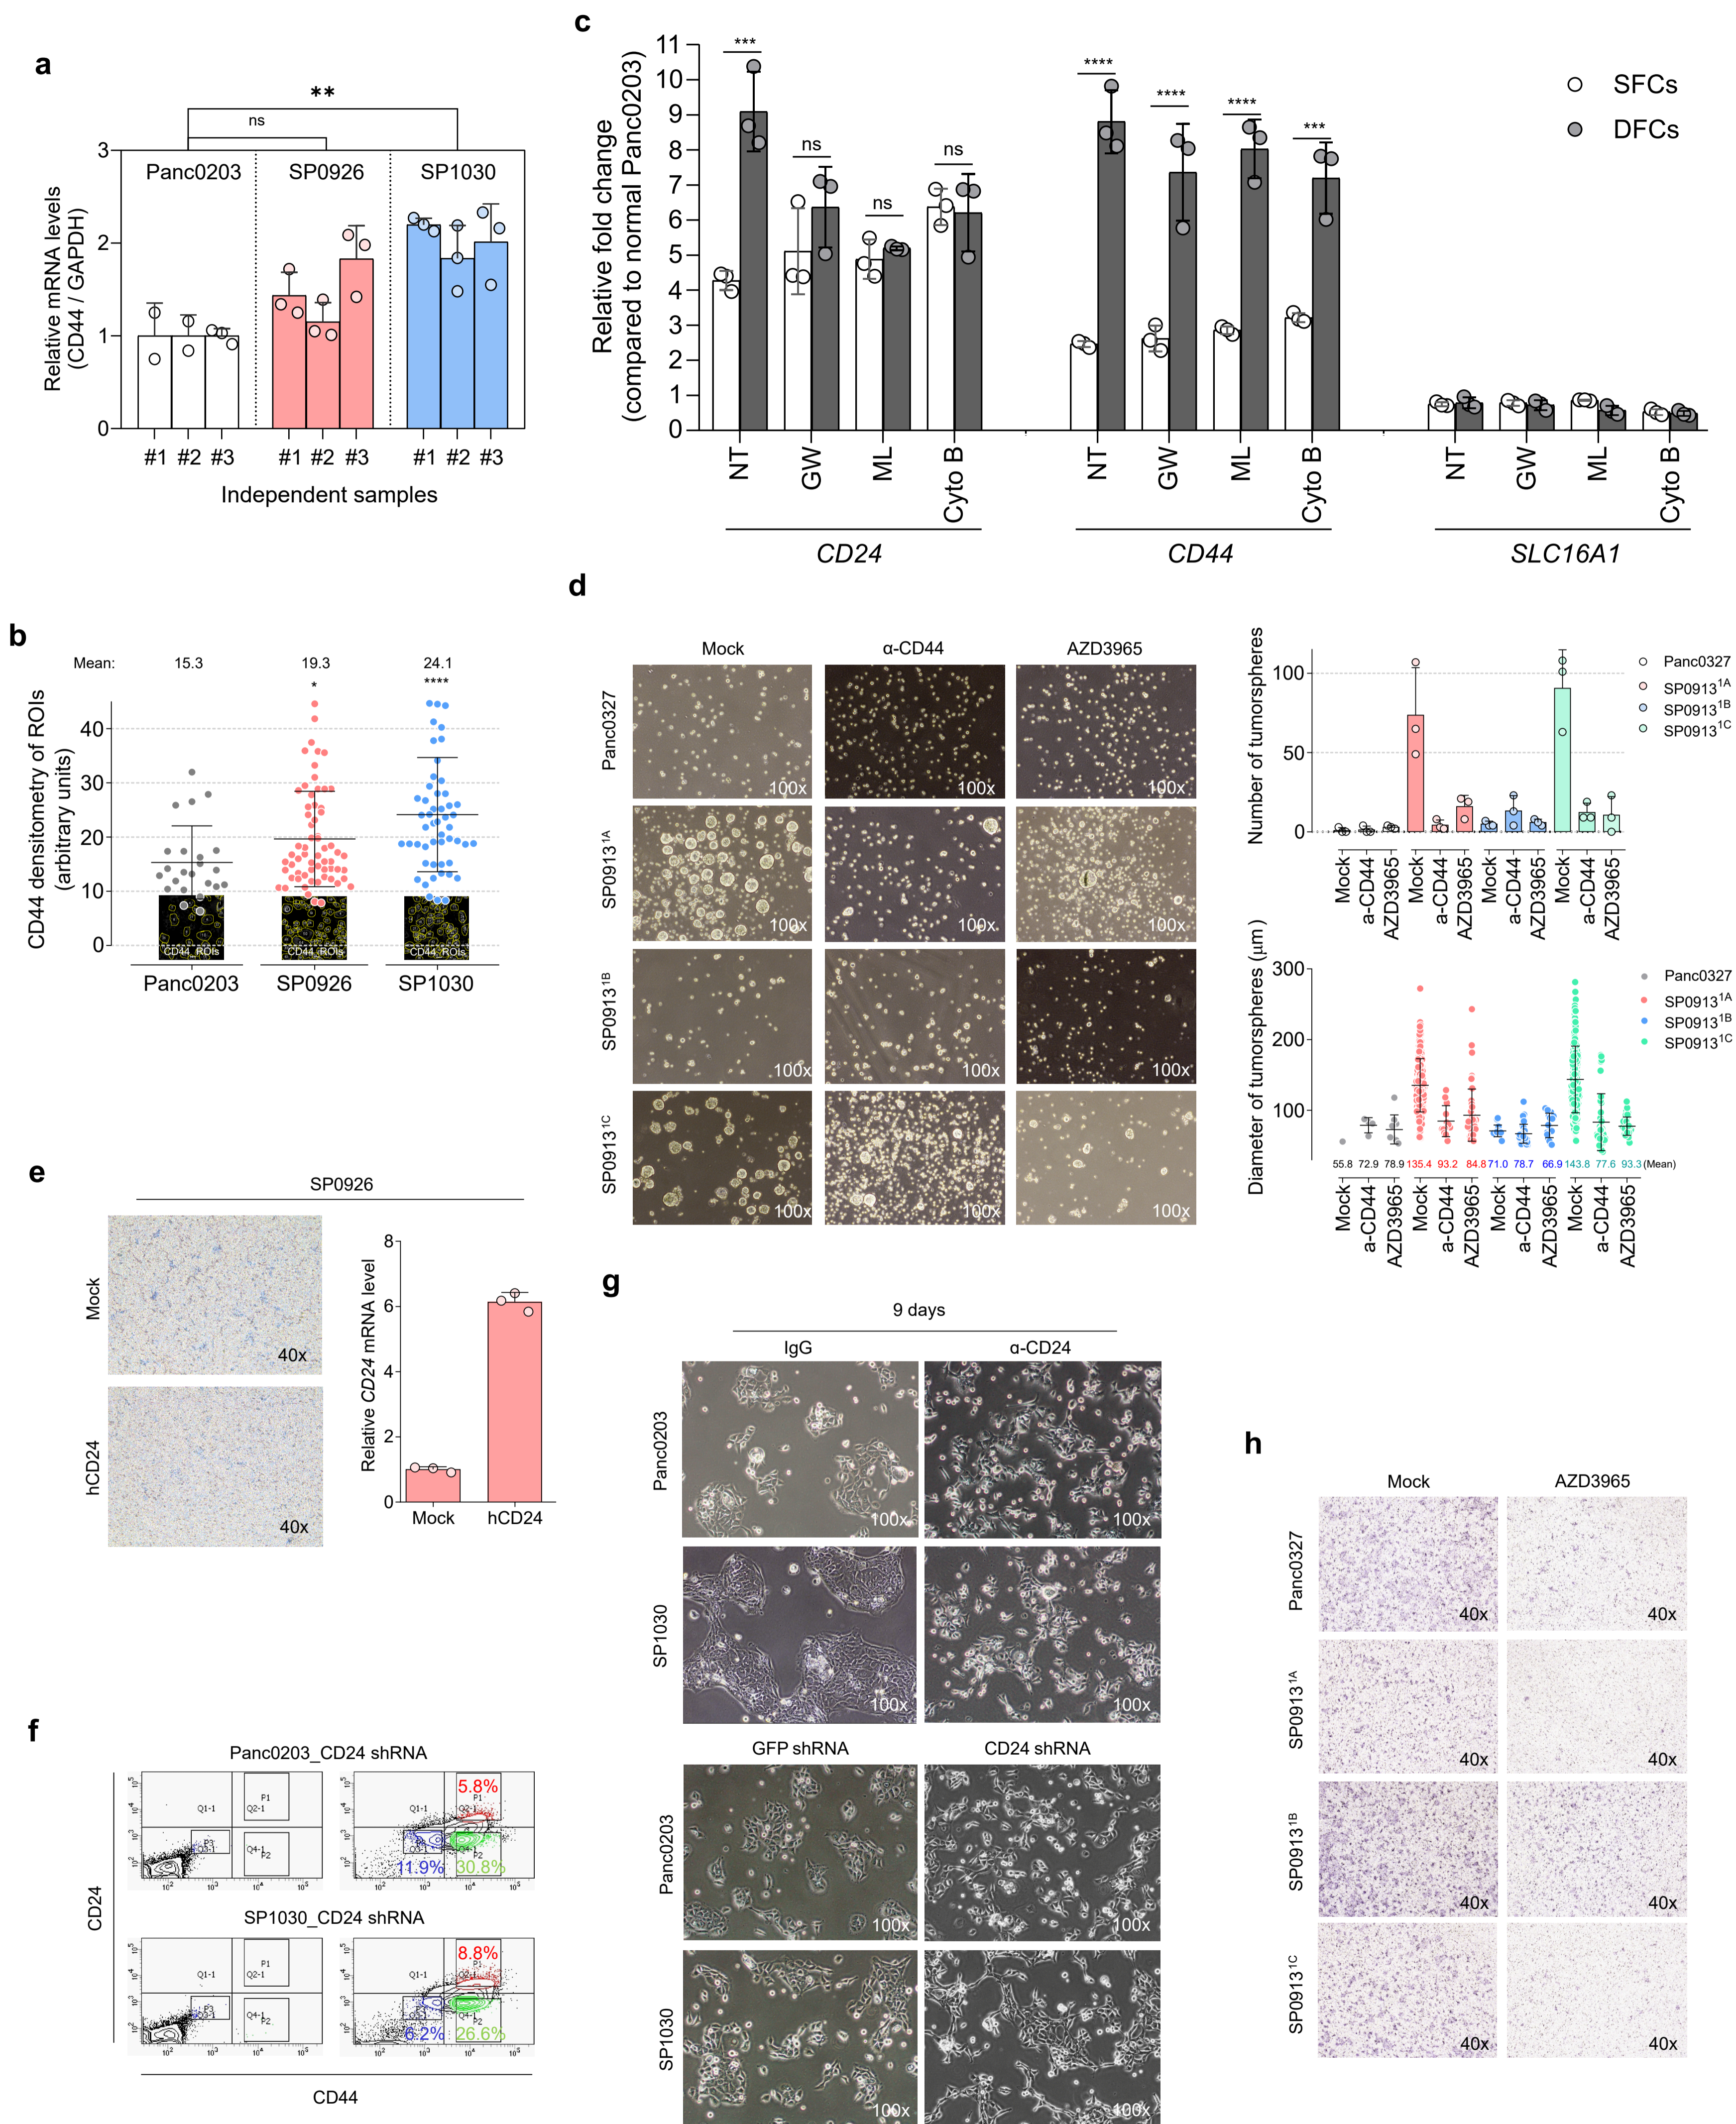

i

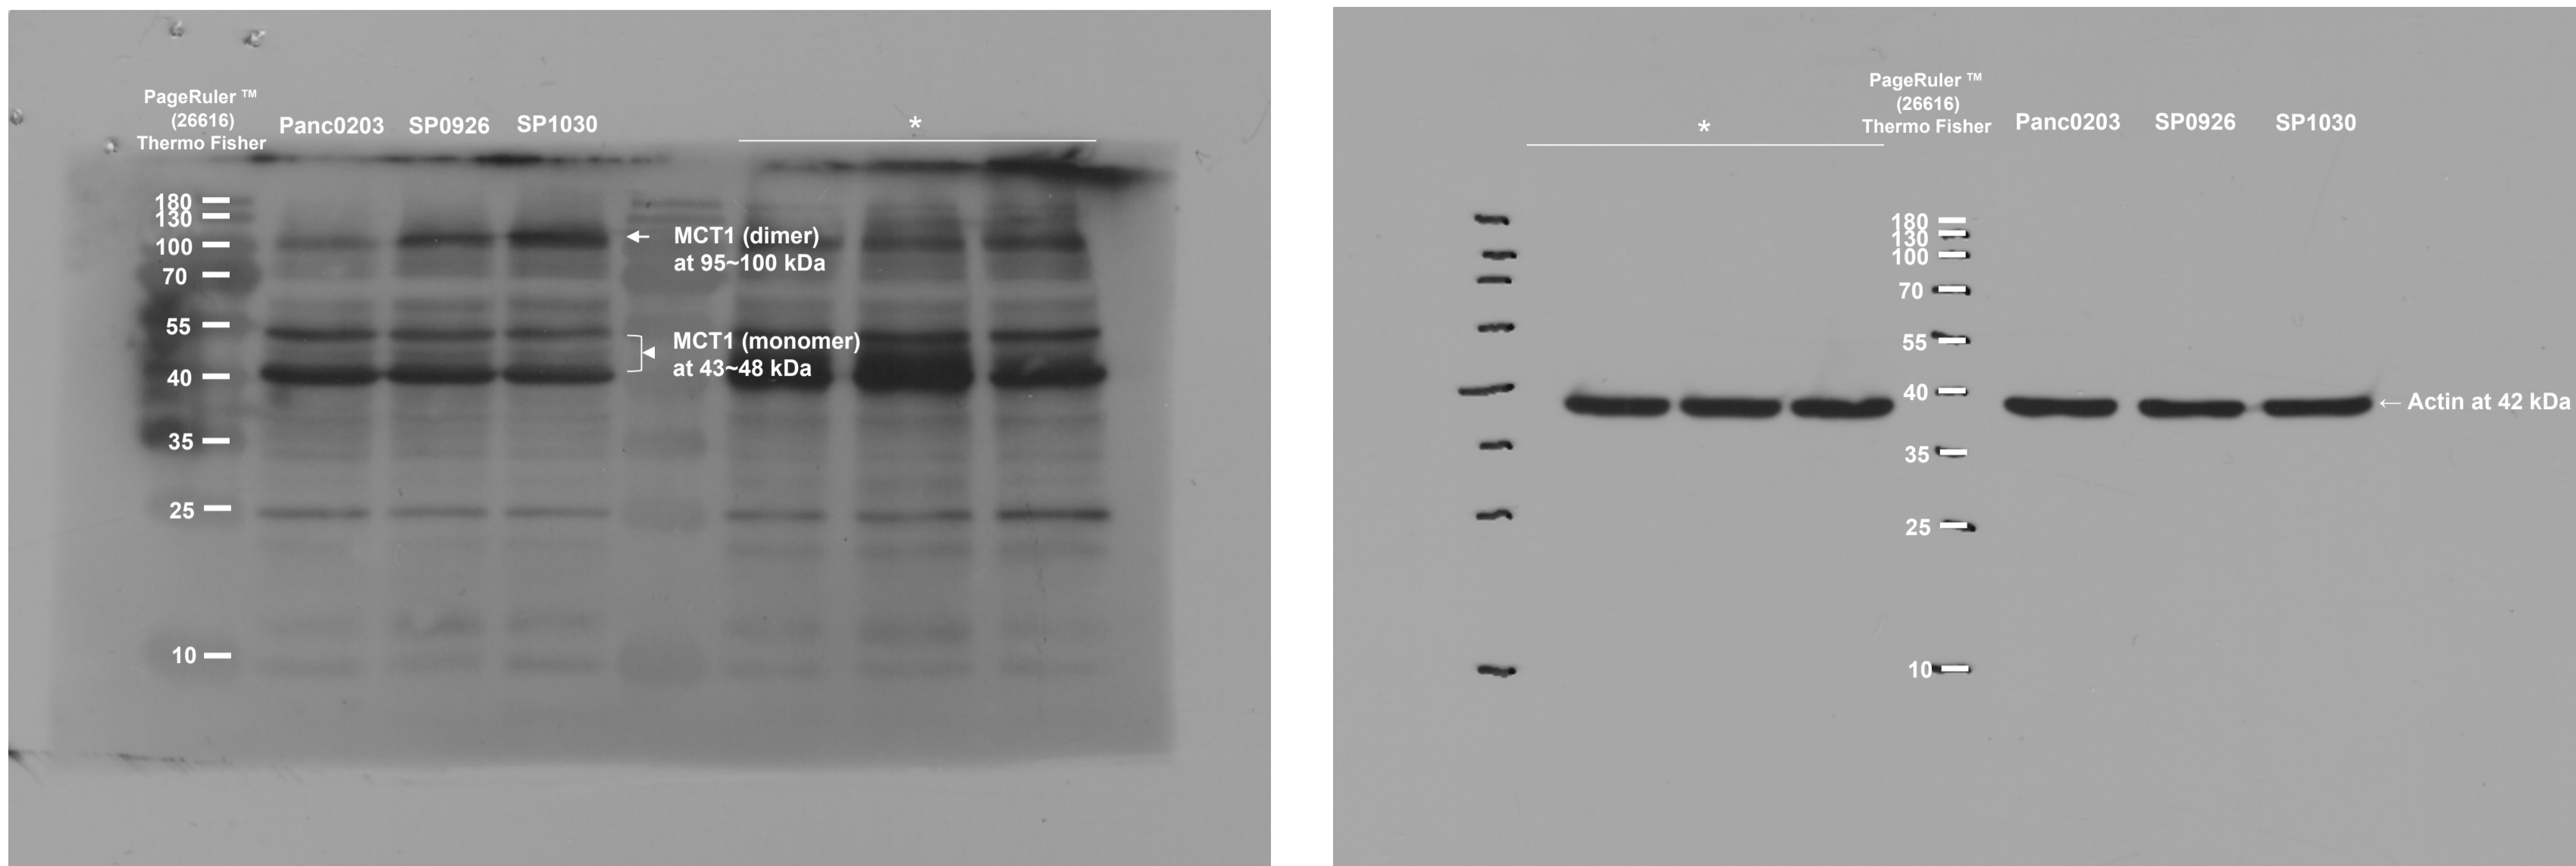

**Supplementary Figure 5. Effect of CD24/CD44/MCT1 suppression on both tumorsphering and invasive activities of pancreatic derivative cancer cells.** **a** Relative *CD44* level of derivative cells compared to that of parental Panc0203. Each independent sample represents a different passaged cell line collected on different days sequentially during the incubation process. Quantitative real-time PCR. \*\*  $P \leq 0.01$ . Ordinary one-way ANOVA followed by Dunnett's multiple comparisons test. **b** CD44 density measurement from confocal images of Panc0203, SP0926 and SP1030. ROIs (regions of interest). \*  $P \leq 0.05$ ; \*\*\*\*  $P \leq 0.0001$ . One-way ANOVA test. ImageJ was used for the image analysis. **c** Relative expression of CD24, CD44, and SLC16A1 in SFCs and DFCs compared to standard-cultured Panc0203. Quantitative real-time PCR. \*\*\*  $P \leq 0.001$ ; \*\*\*\*  $P \leq 0.0001$ . One-way ANOVA followed by Tukey's multiple comparison test. GW (GW4869), ML (ML141), Cyto B (Cytochalasin B). **d** Tumorsphere formation activity of pancreatic derivative cancer cells derived from Panc0327 cells. Spheroids were counted on day 7 after seeding. Left panel shows representative images of tumorspheres, and right panel shows number of tumorspheres (upper) and the diameter of tumorspheres (lower). **e** Human CD24 overexpression effect on SP0926 invasiveness. A 3D invasion assay was conducted for 10 h after seeding  $1 \times 10^5$  cells at 48 h post-transfection (left). *CD24* level was checked by qPCR (60 h after transfection; right). Mock; empty vector, hCD24; human CD24 vector. Upper chamber (serum-free medium), bottom chamber (normal culture medium). **f** CD24 expression levels in *CD24* shRNA-transduced stable cells. Flow cytometry was performed following puromycin selection (0.4  $\mu\text{g/ml}$ ) until stable cells were generated. **g** Changes in spatial growth pattern via treatment with CD24 neutralizing antibody for 9 days (left) and via *CD24* shRNA stable transfection (right). **h** Effect of MCT1 inhibition on invasion activity of derivative cancer cells derived from Panc0327 cells. A 3D invasion assay was performed for 24 h after treatment with the MCT1 inhibitor AZD3965. Total  $1 \times 10^5$  cells were seeded into upper chamber containing Matrigel. Upper chamber; serum-free medium, bottom chamber; normal culture medium for Panc0327. **i** Uncropped and unprocessed scans for MCT1 (left) and beta-actin (right). Left: arrow and arrow head indicate a dimer form (95~100 kDa) and monomer forms (43~48 kDa) of MCT1, respectively<sup>70-72</sup>, when compared to ladder sizes of the used protein marker (PageRuler, Thermo Fisher). Right: arrow indicates  $\beta$ -actin bands (42 kDa). Asterisk: samples not relevant to this study. Cropped images (ROIs) presented on Fig. 5a. All graph data are presented as mean  $\pm$  SD.

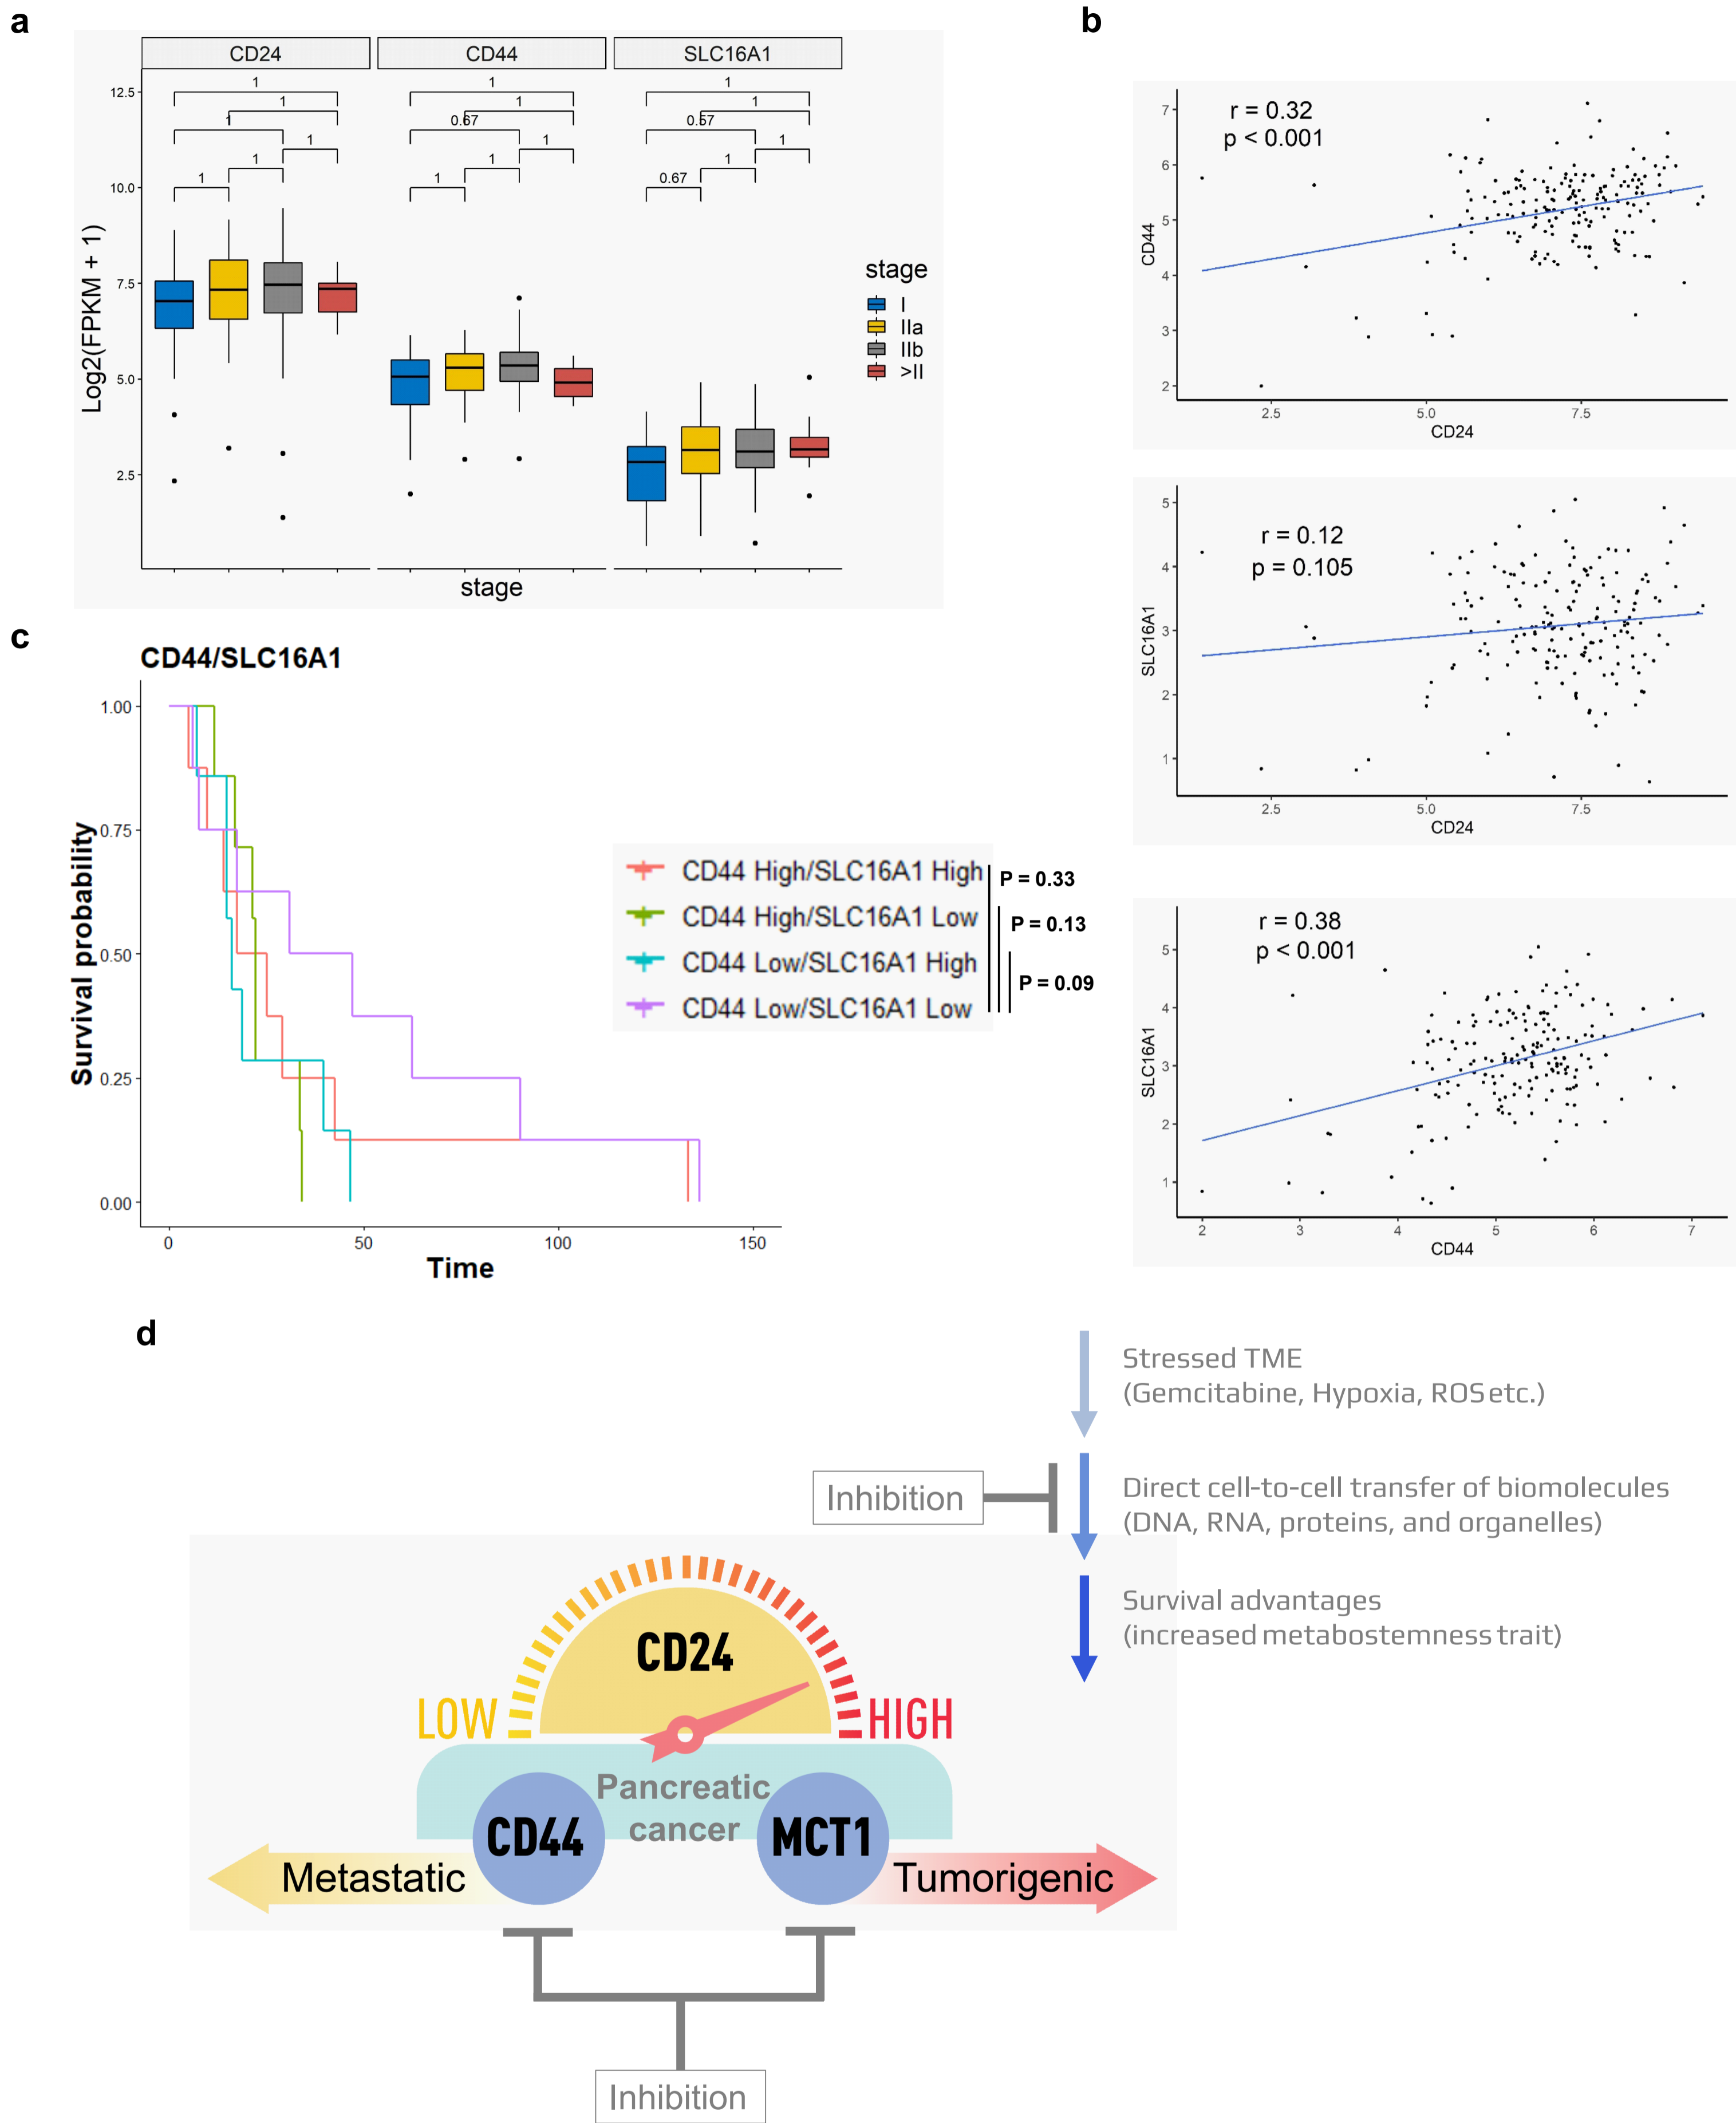

**Supplementary Figure 6. Analysis of *CD24*, *CD44*, and *SLC16A1* expression in pancreatic cancer-patient tissue samples.** **a** Expression of *CD24*, *CD44*, and *SLC16A1* in pancreatic cancer-patient tissue samples (TCGA Pancreatic Cancer (PAAD) database (n = 182)) according to stage. Numbers in graph indicate p-values between samples from different-stage tumors. **b** Correlation of *CD24*, *CD44*, and *SLC16A1* expression in pancreatic cancer-patient tissue samples. Pearson correlation coefficients and p-values from linear regression analysis are indicated. **c** Kaplan-Meier plot for overall survival of pancreatic cancer patients with high or low expression of *CD44*, or *SLC16A1*. Microarray gene-expression profiles (median cutoff) of 30 pancreatic tumors tissue from patients (GSE84219). P = 0.31. **d** Schematic showing CD44/MCT1/CD24 relationship after chemotherapy for pancreatic cancer. Combinations of relative levels of CD44/MCT1/CD24 expression involved in giving rise, post-gemcitabine-treatment, to cancer cells with a relatively high tumorigenic or a high metastatic phenotype compared to primary pancreatic cancer cells.

























































































































































[88]





























































[119]







































|           |                                    |             |                                    |               |              |             |            |             |             |            |            |       |       |       |
|-----------|------------------------------------|-------------|------------------------------------|---------------|--------------|-------------|------------|-------------|-------------|------------|------------|-------|-------|-------|
| 10985     | NM_006836                          | GCN1        | GCN1, eIF2 alpha kinase activat    | -1.195957704  | -1.517622391 | 48.543652   | 40.633823  | 30.056454   | 8.8818614   | 8.42438138 | 8.08186059 | 16084 | 17069 | 13035 |
| 400043    | NR_026856                          | LINC02381   | long intergenic non-protein codin  | -1.6815905099 | -1.517931496 | 1.179991    | 0.692968   | 0.72366     | 1.38110603  | 0.96581954 | 1.03962623 | 63    | 50    | 51    |
| 22092     | NM_001318140.NM_001318141.ZNF485   | LINC0485    | zinc finger protein 485            | -1.29100629   | -1.517997729 | 2.540689    | 1.954486   | 2.597399    | 2.60744196  | 2.30073045 | 2.12264217 | 60    | 206   | 162   |
| 832       | NM_001206540.NM_001206541.CAPZB    | LINC02641   | capping actin protein of muscle 2  | -1.131770402  | -1.51806835  | 108.872482  | 120.036816 | 7.435162    | 7.6332019   | 7.81038874 | 7.0347093  | 7755  | 11727 | 6283  |
| 26054     | NM_001100409.NM_001304792.SENP6    | LINC02792   | SUMO1/sumtrin specific peptidase   | -1.102546345  | -1.518122699 | 15.61455    | 13.546223  | 10.810099   | 6.51246517  | 6.37324105 | 5.91831759 | 3545  | 4296  | 2872  |
| 10435     | NM_006779                          | CDCA2EP2    | CDCA2 effector protein 2           | 1.405540692   | -1.518301306 | 10.065899   | 14.173167  | 6.225698    | 4.38142134  | 4.85249002 | 3.81430154 | 779   | 1463  | 631   |
| 196513    | NM_001319292.NM_152640.NR.DCP1B    | LINC02192   | decapping RNA 1B                   | 1.189411619   | -1.518305257 | 6.340184    | 7.56532    | 3.92959     | 4.08906113  | 4.09601613 | 3.38282219 | 521   | 828   | 422   |
| 23141     | NM_0015114                         | ANKLE2      | ankyrin repeat and LEM domain      | -1.352607071  | -1.518392316 | 74.902489   | 55.433636  | 46.355175   | 7.92272325  | 7.92272325 | 7.75671142 | 12833 | 12676 | 10395 |
| 55027     | NM_001100621.NM_001100642.P7bR80   | LINC02780   | chromosome 17 open reading fra     | -1.136917808  | -1.518395069 | 1.136917808 | 1.23385069 | 5.44334311  | 5.26271827  | 5.44334348 | 4.67538813 | 1468  | 2230  | 1189  |
| 111928527 | NM_001308421.NM_001308422.PGCB     | LINC02781   | PGCB opposite strand 1             | -1.39598729   | -1.51898943  | 9.701962    | 7.188944   | 3.74922444  | 2.97505117  | 2.97505117 | 2.84224948 | 368   | 298   | 206   |
| 100507501 | NR_039999                          | LINC01569   | long intergenic non-protein codin  | -1.341251157  | -1.518981038 | 13.43001    | 2.347675   | 2.89117014  | 2.53229878  | 2.53229878 | 2.38534784 | 252   | 251   | 204   |
| 5569      | NM_006823.NM_181839                | PKIA        | cAMP-dependent protein kinase      | 1.043838235   | -1.519337832 | 0.94015     | 0.980684   | 0.581557    | 2.28439817  | 2.3383942  | 1.8266989  | 152   | 212   | 123   |
| 283869    | NM_001099456                       | NPW         | neurotrophin W                     | 1.288660566   | -1.519337832 | 3.901654    | 5.049017   | 2.414385    | 2.28439817  | 2.58366954 | 1.8266989  | 152   | 262   | 123   |
| 347744    | NM_001145020.NR_026736.NR.C6orf52  | LINC02673   | chromosome 6 open reading fra      | 1.408828355   | -1.519366789 | 1.044398    | 1.517075   | 0.585013    | 0.73313634  | 0.95166931 | 0.52045463 | 26    | 49    | 21    |
| 604018    | NR_073415                          | HSP230B4BP  | heat shock protein 90 alpha fami   | -1.157223357  | -1.519366789 | 0.208662    | 0.184047   | 0.128548    | 0.73313634  | 0.85251278 | 0.52045463 | 26    | 36    | 21    |
| 85865     | NM_001042717.NM_033107             | GTPBP10     | GTP binding protein 10             | -1.61518553   | -1.519462019 | 4.794386    | 2.97503    | 1.000452    | 5.17502889  | 4.50788353 | 4.50228933 | 1380  | 1141  | 1117  |
| 100302138 | NR_031699                          | MIR1292     | microRNA 1292                      | 1.193356706   | -1.519510406 | 1.927714    | 2.152628   | 1.000452    | 0.17294258  | 0.20477631 | 0.1148164  | 5     | 8     | 4     |
| 677795    | NR_002990                          | SNORA5B     | small nucleolar RNA, H/ACA box     | 1.193356706   | -1.519510406 | 0.8222      | 1.140928   | 0.545734    | 0.17294258  | 0.20477631 | 0.1148164  | 5     | 8     | 4     |
| 102466744 | NR_106885                          | MRN827      | microRNA 827                       | -5.96997905   | -1.519510406 | 2.019498    | 0.325652   | 1.033124    | 0.17294258  | 0.02724389 | 0.1148164  | 5     | 1     | 4     |
| 406933    | NR_026862                          | MIR141      | microRNA 141                       | 1.193366706   | -1.519510406 | 1.131519    | 1.603676   | 0.766616    | 0.17294258  | 0.20477631 | 0.1148164  | 5     | 8     | 4     |
| 100422965 | NR_030230                          | MIR4283     | microRNA 4283                      | -2.171056089  | -1.519510406 | 1.263905    | 0.705154   | 0.743927    | 0.17294258  | 0.08023518 | 0.1148164  | 5     | 3     | 4     |
| 101927084 | NR_119383                          | LINC01359   | long intergenic non-protein codin  | -2.171056089  | -1.519510406 | 0.104201    | 0.046171   | 0.057893    | 0.17294258  | 0.08023518 | 0.1148164  | 5     | 3     | 4     |
| 407012    | NR_029496                          | MIR24-1     | microRNA 24-1                      | 1.04680643    | -1.519510406 | 1.57699     | 1.886527   | 0.893477    | 0.17294258  | 0.18071335 | 0.1148164  | 5     | 7     | 4     |
| 83940     | NM_001146160.NM_001317889.TATDN1   | LINC02889   | TatD DNase domain containing 1     | 1.003646702   | -1.519923267 | 79.481587   | 75.401403  | 49.343814   | 6.35572529  | 6.36091297 | 5.7608309  | 3178  | 4259  | 2570  |
| 10274     | NM_005862                          | STAG1       | strait antigen 1                   | 1.330881709   | -1.520227944 | 7.07749     | 9.431749   | 4.73972     | 5.59689816  | 5.19411105 | 4.61012283 | 1376  | 2486  | 1131  |
| 440844    | NR_027007.NR_132780.NR_1313        | THUMPD3-AS1 | THUMPD3 antisense RNA 1            | 1.16006139    | -1.520435669 | 12.791467   | 14.865887  | 7.290375    | 4.43678607  | 4.84170569 | 3.86644371 | 811   | 1257  | 656   |
| 7960      | NM_001046187                       | ISE1        | unconventional SNARE1 of the EF    | 1.152407912   | -1.520435669 | 16.350174   | 16.350174  | 11.74029831 | 5.87043616  | 5.87043616 | 5.31932404 | 622   | 715   | 311   |
| 72861     | NM_001110781.NM_001290284.SLC35E2B | LINC02884   | solute carrier family 35 member 1  | -4.99712303   | -1.520460264 | 10.468619   | 2.038291   | 6.275953    | 3.73044266  | 5.39526888 | 2.4409     | 564   | 644   | 1948  |
| 5283      | NM_004569                          | PIGH        | phosphatidylinositol glycan anch   | 1.049343615   | -1.521045932 | 12.341037   | 12.974375  | 7.624036    | 4.19336823  | 4.25915261 | 3.62870475 | 679   | 952   | 548   |
| 54816     | NM_001002843.NM_001002844.ZNF280D  | LINC0280D   | zinc finger protein 280D           | -1.144031253  | -1.521111358 | 7.587758    | 6.610502   | 4.591467    | 5.15339049  | 4.96507495 | 4.56917629 | 1358  | 1589  | 1098  |
| 116937    | NR_000027                          | SNORD83A    | small nucleolar RNA, C/D box 83    | 1.399177305   | -1.521175324 | 40.126678   | 24.798363  | 14.23841445 | 2.63327382  | 1.78395874 | 1.98395874 | 3178  | 4259  | 2570  |
| 51371     | NM_00151532                        | POMP        | proteasome maturation protein      | -1.143961764  | -1.52121087  | 63.953564   | 55.968098  | 39.506222   | 6.52329217  | 6.33150339 | 5.92620061 | 3572  | 4172  | 2888  |
| 55850     | NM_001082537.NM_001082538.TC1N1    | LINC02537   | ectonic family member 1            | 1.099191798   | -1.521227964 | 15.648483   | 15.648483  | 9.00029464  | 5.03216741  | 5.03216741 | 4.59229404 | 2960  | 3834  | 2393  |
| 51182     | NM_001278205.NM_016299.NR.HSPA14   | LINC02705   | heat shock protein family A (Hsp)  | -1.031335285  | -1.521327446 | 32.906649   | 30.915347  | 19.905694   | 6.25539649  | 6.21119301 | 5.65994858 | 2960  | 3834  | 2393  |
| 10457     | NM_001005340.NM_002510             | GPNMB       | glycoprotein nmb                   | -1.370586258  | -1.521635317 | 0.7338      | 0.532637   | 0.456819    | 1.57857476  | 1.29208824 | 1.20457043 | 78    | 76    | 63    |
| 23549     | NM_001319116.NM_001319117.DNPEP    | LINC02716   | aspartyl aminopeptidase 1          | 1.36764723    | -1.521786261 | 19.415194   | 22.759523  | 11.984256   | 6.43621034  | 5.61970202 | 4.96170202 | 2878  | 4490  | 2326  |
| 3084      | NM_001159995.NM_001159996.NRG1     | LINC02716   | neuregulin 1                       | 1.730376541   | -1.522575697 | 0.843648    | 0.332296   | 0.396951    | 1.63881618  | 2.2203867  | 1.25551499 | 83    | 192   | 67    |
| 102462688 | NR_109865.NR_109866                | PCAF-AS1    | PCAF antisense RNA 1               | -1.28903289   | -1.5225933   | 3.498711    | 2.259393   | 1.983857    | 1.59891611  | 1.40261124 | 1.25514499 | 83    | 192   | 67    |
| 25936     | NM_001042549.NM_001297736.NSL1     | LINC02736   | NSL1, MIS12 kinetochore compk      | 1.07883229    | -1.522765152 | 2.800778    | 3.191972   | 1.730111    | 5.20511061  | 5.31171658 | 4.61866105 | 1409  | 2031  | 1138  |
| 10128     | NM_133259                          | LRPPRC      | leucine rich pentanucleotide rep   | 1.040956689   | -1.52280823  | 42.742409   | 44.544212  | 26.375708   | 8.1109793   | 8.16868458 | 7.50696842 | 10815 | 15042 | 8735  |
| 7818      | NM_001199648.NM_001199650.DAP3     | LINC02736   | death associated protein 3         | -1.275453675  | -1.522812012 | 72.772603   | 57.027655  | 44.958458   | 7.20167463  | 6.85335388 | 6.60030701 | 5740  | 6013  | 4636  |
| 9260      | NM_005451.NM_203352.NM_21          | PDLIM7      | PDZ and LIM domain 7               | 1.02656040    | -1.523095737 | 163.601629  | 199.289599 | 103.072089  | 8.02513761  | 8.29042356 | 7.42101683 | 10188 | 16371 | 8227  |
| 109617013 | NR_145752                          | SNORD63B    | small nucleolar RNA, C/D box 63    | 1.08628165    | -1.523675579 | 22.162394   | 23.948378  | 13.536065   | 1.36692851  | 1.44132992 | 1.02535867 | 62    | 90    | 50    |
| 8042      | NM_001032520                       | CHPTG       | N-acetylglucosamine-1-phosphat     | -1.025697905  | -1.52382502  | 76.966025   | 74.771622  | 47.20548925 | 6.15153086  | 6.15153086 | 5.97023064 | 3644  | 4704  | 2841  |
| 100302273 | NR_031655                          | MIR1254-1   | microRNA 1254-1                    | -1.055403173  | -1.524323174 | 5.900505    | 5.6602     | 5.935068    | 0.93882015  | 0.67858507 | 0.67858507 | 29    | 29    | 29    |
| 22944     | NM_012311.NR_045609                | KIN         | Kin17 DNA and RNA binding pr       | -1.070981329  | -1.52482366  | 5.020376    | 4.524682   | 2.937381    | 4.89267947  | 4.79717993 | 4.30923152 | 1127  | 1408  | 909   |
| 10500     | NM_001178061.NM_001178062.SEMA6C   | LINC02762   | semaphorin 6C                      | 1.254010954   | -1.524990192 | 1.470728    | 1.852284   | 0.889307    | 3.01642592  | 2.73434891 | 2.23479744 | 222   | 372   | 179   |
| 11035     | NM_006871                          | RIPK3       | receptor interacting serine/threon | -1.750040846  | -1.52500606  | 3.4397      | 1.964705   | 2.112861    | 2.89611494  | 2.22627631 | 2.38534784 | 594   | 473   | 204   |
| 93058     | NM_001099337.NM_144576             | COQ10A      | coenzyme Q10A                      | -1.674177813  | -1.525071319 | 9.98106     | 5.917952   | 5.798959    | 4.01166006  | 3.32712381 | 3.44886991 | 254   | 194   | 479   |
| 11109     | NM_001025248.NM_001025249          | PRDM1       | deoxydinucleoside triphosphatase   | -1.044468024  | -1.525071319 | 6.04288261  | 58.917891  | 37.68041589 | 6.789401582 | 6.24827932 | 5.4405     | 5752  | 7502  | 4405  |
| 2004      | NM_001303511.NM_005230             | ELK3        | ELK3, ETS transcription factor     | -1.421373029  | -1.525329585 | 11.818718   | 8.320255   | 7.278475    | 5.62629618  | 5.13123263 | 5.03239442 | 1900  | 1786  | 1532  |
| 55617     | NM_001323602.NM_001323603.TASP1    | LINC02763   | taspase 1                          | 1.260276983   | -1.525785901 | 6.743225    | 8.453985   | 4.021007    | 4.02074421  | 4.33606188 | 3.45705395 | 598   | 1007  | 485   |
| 8131      | NM_001039476.NM_001077350.NPRL3    | LINC02763   | NPR3 like, GATOR1 complex sub      | 1.194184783   | -1.525810015 | 16.369254   | 19.342013  | 9.9935      | 5.56163349  | 5.81269754 | 4.9679855  | 1815  | 2896  | 1463  |
| 388685    | NR_027468.NR_104014                | LINC01138   | long intergenic non-protein codin  | 1.419758724   | -1.52625811  | 4.943568    | 7.085086   | 3.253166    | 3.30959645  | 3.77188848 | 2.77440153 | 305   | 664   | 282   |
| 54991     | NM_001330306.NM_0017891            | C1orf159    | chromosome 1 open reading fra      | -1.028032394  | -1.526594692 | 16.563909   | 16.985958  | 5.37947297  | 5.34051034  | 4.78719527 | 4.595      | 1965  | 2073  | 1285  |
| 100126793 | NR_001408                          | PRSET1      | PRSET domain 4                     | -1.61549651   | -1.52698717  | 1.543866    | 1.790027   | 5.29027287  | 4.61950066  | 4.61950066 | 4.02684696 | 1406  | 1254  | 106   |
| 51071     | NR_004431.NR_024144.NR_02          | GHRLOS      | ghrelin oppoiste strand/antisense  | 1.317155293   | -1.527144216 | 0.802135    | 0.410848   | 1.11880553  | 3.37177096  | 3.37177096 | 3.02684696 | 46    | 81    | 37    |
| 100506022 | NM_001300779.NM_0015954            | DERA        | deoxyribose-phosphate aldolase     | -1.07993045   | -1.527305944 | 27.089919   | 25.035482  | 16.70024    | 5.59546755  | 5.48690566 | 5.00082624 | 1859  | 2300  | 1497  |
| 100506380 | NR_106797                          | LINC00106   | uncharacterized LOC100506022       | 1.787811912   | -1.528313037 | 0.10841     | 0.195882   | 0.067336    | 0.3273552   | 0.54351856 | 0.22116494 | 10    | 24    | 8     |
| 100506380 | NR_106797                          | LINC00106   | uncharacterized LOC100506022       | -4.296018784  | -1.528313037 | 0.322924    | 0.077579   | 0.210958    | 0.3273552   | 0.08023518 | 0.22116494 | 10    | 3     | 8     |
| 100506380 | NR_106797                          | LINC00106   | uncharacterized LOC100506022       | 1.34350598    | -1.528313037 | 0.225998    | 0.439824   | 2.089862    | 0.3273552   | 0.42961192 | 0.22116494 | 10    | 8     | 8     |
| 100506380 | NM_002545                          | TNFRSF13C   | TNF receptor superfamily memb      | 1.215806855   | -1.528313037 | 0.264569    |            |             |             |            |            |       |       |       |

|           |                                         |                                   |                                      |              |              |             |             |             |             |            |             |       |       |       |
|-----------|-----------------------------------------|-----------------------------------|--------------------------------------|--------------|--------------|-------------|-------------|-------------|-------------|------------|-------------|-------|-------|-------|
| 23383     | NM_0151239                              | MAU2                              | MAU2 sister chromatid cohesion       | -1.171523179 | -1.534020541 | 15.961831   | 13.636368   | 9.775942    | 6.25587742  | 6.03071759 | 5.64857748  | 2961  | 3377  | 2374  |
| 25871     | NM_001319109.NM_001319110               | NEPRO                             | nucleolar and neural progenitor 1    | 1.368898901  | -1.534103975 | 15.931029   | 21.778346   | 9.765408    | 6.2602635   | 6.68388028 | 5.62878784  | 2920  | 5340  | 2341  |
| 26801     | NR_002745                               | SNORD48                           | small nucleolar RNA, C/D box 48      | -1.429367659 | -1.534349076 | 12.056689   | 8.472606    | 7.254405    | 6.81895953  | 6.01708849 | 5.62096975  | 30    | 282   | 24    |
| 3757      | NM_000238.NM_001204798.NM000238         | SNORD48                           | potassium voltage-gated channel      | -1.877713185 | -1.534390376 | 0.189278    | 0.009138    | 0.189278    | 0.03382822  | 0.03382822 | 0.58206975  | 2     | 2     | 2     |
| 1294      | NM_000094                               | COL7A1                            | collagen type VII alpha 1 chain      | 8.102642174  | -1.534467422 | 2.313821    | 18.771116   | 14.15982    | 4.43676607  | 7.39571573 | 3.85410038  | 811   | 8781  | 650   |
| 8796      | NM_001160706.NM_003843.NM5CEL           | scellin                           | scellin                              | -1.533393676 | -1.534830336 | 24.559467   | 16.030082   | 15.038613   | 6.27450999  | 5.66766141 | 5.6663355   | 3000  | 2614  | 2404  |
| 3921      | NM_001304288.NM_002295                  | RPSA                              | ribosomal protein S/A                | 1.132013693  | -1.535109186 | 654.318144  | 742.421924  | 400.596686  | 9.54461581  | 9.72442773 | 8.92730494  | 29281 | 44323 | 23460 |
| 84650     | NM_001278636.NM_0032565.NR.EBPL         | emopami binding protein like      | emopami binding protein like         | -1.064842186 | -1.535116871 | 32.33911    | 30.20469    | 19.869711   | 4.98839509  | 4.90116298 | 4.39409566  | 1207  | 1515  | 967   |
| 7443      | NM_0033584                              | RRK1                              | vaccinia related kinase 1            | -1.05238771  | -1.535304343 | 51.728252   | 49.211468   | 31.655022   | 6.43940102  | 6.36859803 | 5.82969904  | 3368  | 4276  | 2698  |
| 112752    | NM_001102564.NM_001255995               | TFAM                              | mitochondrial transcription factor 1 | 1.2585967    | -1.535363522 | 52.908487   | 42.136202   | 25.703852   | 5.54838919  | 5.14718204 | 4.58206975  | 430   | 1383  | 1083  |
| 374443    | NR_002814.NR_046444.NR_041LOC374443     | C-type lectin domain family 2 me  | C-type lectin domain family 2 me     | -1.271344227 | -1.535516326 | 4.909928    | 3.916155    | 3.128677    | 3.64534899  | 3.3286914  | 3.08691439  | 452   | 475   | 362   |
| 100130958 | NM_001129979.NM_001348924               | SYCE1L                            | synaptosomal complex central el      | -1.083181726 | -1.535879699 | 1.831295    | 1.68713     | 1.110415    | 1.33814853  | 1.26944952 | 0.99569924  | 60    | 74    | 48    |
| 60490     | NM_001301101.NM_001301102               | PPDCD                             | phosphatidylethanolamine de          | -1.643539447 | -1.53608865  | 15.029145   | 8.958331    | 8.912635    | 5.00794161  | 4.31962786 | 4.41245104  | 1224  | 1620  | 980   |
| 8464      | NM_001261823.NM_001350324               | SUPF3H                            | SPF3 homolog, SAGA and STAC          | -1.361570396 | -1.536300541 | 5.513732    | 3.851082    | 3.133446    | 3.5668994   | 3.16487058 | 3.0111152   | 426   | 418   | 340   |
| 55144     | NM_001134478.NM_018103                  | LRRCD                             | leucine rich repeat containing 8 f   | 1.059906902  | -1.536390425 | 10.438425   | 11.098134   | 6.377573    | 5.30143773  | 5.38331039 | 4.70137402  | 1509  | 2137  | 1208  |
| 199704    | NM_001288900.NM_152655.NM2NF585A        | zinc finger protein 585A          | zinc finger protein 585A             | -3.55811599  | -1.536955362 | 3.902965    | 0.652528    | 1.381842    | 2.60744196  | 1.28081328 | 2.10885534  | 200   | 75    | 180   |
| 51548     | NM_001193285.NM_001321058               | SIRT6                             | sirtuin 6                            | -1.072888883 | -1.537067466 | 22.197047   | 20.719258   | 13.48401    | 5.15132397  | 5.05303203 | 4.52721225  | 1356  | 1689  | 1085  |
| 47005     | NM_001349012.NM_001349013               | TSGA10                            | testis specific 10                   | 1.403160504  | -1.537088496 | 2.690581    | 3.166424    | 1.468804    | 3.02359429  | 3.46052158 | 2.49540988  | 280   | 525   | 245   |
| 439931    | NR_027051.NR_027052                     | THAP7-AS1                         | THAP7 antisense RNA 1                | 1.205435541  | -1.537088496 | 5.589705    | 6.754412    | 3.491687    | 3.02359429  | 3.2626764  | 2.49540988  | 280   | 451   | 224   |
| 106824    | NM_001270391.NM_001270392               | RAS5F6                            | Ras association domain family m      | -2.358774419 | -1.537178624 | 1.6867      | 0.167722    | 0.109978    | 3.43381096  | 2.36620557 | 2.88323104  | 385   | 218   | 308   |
| 339366    | NM_213604                               | ADAMTSL5                          | ADAMTSL5 like 5                      | -2.030561991 | -1.537198022 | 3.795764    | 1.869564    | 2.317033    | 3.53238053  | 2.63327382 | 2.9773697   | 415   | 273   | 332   |
| 3087      | NM_002729                               | HHEX                              | hematopoietically expressed hon      | -5.751654435 | -1.537882963 | 9.343217    | 1.619024    | 5.711527    | 4.0892716   | 1.9196316  | 3.51308411  | 629   | 146   | 503   |
| 1108      | NM_001273.NM_001297553                  | CHD4                              | chromodomain helicase DNA bin        | 1.106472015  | -1.537906396 | 33.966482   | 37.741818   | 20.938583   | 7.76304126  | 7.90837074 | 7.14563148  | 8489  | 12550 | 6789  |
| 9255      | NM_001142415.NM_001142416               | AIMP1                             | aminoacyl tRNA synthetase comp       | -1.104730046 | -1.538189677 | 38.050363   | 33.541562   | 23.789884   | 6.63842332  | 6.49624116 | 6.02404052  | 3872  | 4683  | 3096  |
| 100133331 | NR_028327.chr1.NR_028327.c10CC100133331 | uncharacterized LOC100133331      | uncharacterized LOC100133331         | 1.058871761  | -1.538283684 | 25.282915   | 14.568055   | 6.64724883  | 6.72897843  | 6.03363206 | 3896        | 5512  | 3115  |       |
| 55219     | NM_001282564.NM_018202                  | TMEM57                            | transmembrane protein 57             | 1.38387141   | -1.538462251 | 6.935656    | 4.909112    | 4.124527    | 4.76334931  | 5.1272889  | 4.17011265  | 1027  | 1899  | 921   |
| 10169     | NM_00118108.NM_001198475                | TMEM27                            | transmembrane protein 27             | -1.699136142 | -1.538819182 | 10.7619     | 9.08917025  | 6.988674    | 4.77134494  | 6.988674   | 6.988674    | 9859  | 6615  | 7881  |
| 84695     | NM_001289164.NM_001289165               | LXXL3                             | lysyl oxidase like 3                 | -1.038091328 | -1.538972182 | 0.830992    | 1.756128    | 0.50193     | 2.01115992  | 2.61991364 | 1.56919173  | 119   | 270   | 95    |
| 283624    | NR_038970.NR_038971                     | LINC00641                         | long intergenic non-protein codin    | 1.234778332  | -1.539888104 | 13.9363     | 18.116411   | 8.079916    | 6.07801211  | 6.37820906 | 5.4663377   | 2613  | 4311  | 2087  |
| 116540    | NM_0035050                              | MRPL53                            | mitochondrial ribosomal protein L    | -1.07946025  | -1.540297542 | 62.812378   | 58.243374   | 38.30719    | 5.35987438  | 5.2523455  | 4.75546927  | 1573  | 1947  | 1256  |
| 645158    | NR_033754                               | CBX3P2                            | chromobox 3 pseudogene 2             | -1.406572429 | -1.540368139 | 1.800866    | 1.286055    | 1.940225    | 1.81624731  | 1.48128072 | 1.39836968  | 490   | 94    | 79    |
| 52        | NM_0011040649.NM_004300.NMACP1          | acid phosphatase 1, soluble       | acid phosphatase 1, soluble          | -1.012118188 | -1.540590041 | 8.45452     | 81.800431   | 50.51546    | 6.95152649  | 6.53428958 | 6.33430752  | 4820  | 6363  | 3848  |
| 100506599 | NR_038969                               | PPP1R26-AS1                       | PPP1R26 antisense RNA 1              | 1.383931054  | -1.54042218  | 3.54042218  | 3.54042218  | 3.54042218  | 4.4518262   | 4.07849624 | 3.6929752   | 451   | 534   | 360   |
| 54765     | NM_015783                               | TRIM44                            | tripartite motif containing 44       | -1.094564667 | -1.54081834  | 23.351118   | 21.349995   | 14.239771   | 7.11737959  | 6.98749203 | 6.4992752   | 5412  | 6604  | 4320  |
| 4678      | NM_001195193.NM_002482.NMNASP           | nuclear autoantigenic sperm prot  | nuclear autoantigenic sperm prot     | 1.035114292  | -1.540867094 | 158.168764  | 157.380753  | 89.771445   | 8.67980191  | 8.72947296 | 8.05795556  | 16061 | 22213 | 12820 |
| 622       | NM_004051.NM_003314.NM_20BDH1           | 3-hydroxybutyrate dehydrogenas    | 3-hydroxybutyrate dehydrogenas       | -1.23892473  | -1.541067559 | 12.634385   | 10.19015    | 7.708309    | 4.53908863  | 5.13827799 | 4.83298924  | 1684  | 1795  | 1328  |
| 3224      | NM_0022658                              | HOCXB                             | homeobox C8                          | -1.662091405 | -1.54120163  | 2.088482    | 1.258776    | 1.269507    | 2.50111114  | 1.92688293 | 2.00847214  | 103   | 146   | 148   |
| 5951      | NM_001034194.NM_005033                  | EC6B59                            | exosome component 9                  | 1.0236609    | -1.541498962 | 41.226772   | 41.226772   | 41.226772   | 5.04294509  | 5.04294509 | 4.70011938  | 2622  | 3408  | 2062  |
| 80178     | NM_025108                               | C16orf59                          | chromosome 16 open reading fra       | 1.21887012   | -1.541740076 | 11.108653   | 13.559155   | 6.767663    | 4.2192465   | 4.49065976 | 3.63593285  | 692   | 1127  | 552   |
| 55214     | NM_001134418.NM_018192                  | P3H2                              | prolyl 3-hydroxylase 2               | 4.697156015  | -1.541779207 | 3.598445    | 16.930603   | 2.191733    | 3.80372238  | 5.95204783 | 3.23384841  | 509   | 3965  | 4062  |
| 439965    | NR_027634                               | FAM35DP                           | family with sequence similarity 37   | -2.032480989 | -1.541982846 | 0.507444    | 0.24623     | 0.303645    | 1.39514558  | 0.84852988 | 1.03996283  | 64    | 42    | 51    |
| 100144748 | NM_001126049                            | KLLN                              | kinin, p53-regulated DNA replicat    | -1.525654824 | -1.541982846 | 0.386929    | 0.256105    | 0.237743    | 1.39514558  | 1.04792463 | 1.03996283  | 64    | 56    | 51    |
| 5598      | NM_0027749.NM_139032.NM_139033          | MAF2                              | mitogen-activated protein kinase     | -1.541648696 | -1.542053341 | 4.214332    | 4.633802    | 2.510408    | 3.72253824  | 3.78998948 | 3.15558012  | 479   | 673   | 382   |
| 79144     | NM_001180555.NM_001426400               | BRCA1-IRBCA2-containig factor 2   | BRCA1-IRBCA2-containig factor 2      | 1.13116859   | -1.54217513  | 15.198765   | 14.54247214 | 9.184793    | 5.83484721  | 5.83484721 | 5.83484721  | 489   | 673   | 382   |
| 163126    | NM_153322                               | EPADK                             | EP300 interacting inhibitor of diff  | -1.419158752 | -1.542525044 | 1.176727    | 1.176727    | 1.176727    | 4.5618359   | 4.08211055 | 3.98921401  | 879   | 836   | 708   |
| 5378      | NM_000534.NM_001128143.NMPPM51          | PMS1                              | PMS1 homolog 1, mismatch reps        | 1.077041917  | -1.542636821 | 13.69711    | 14.956151   | 8.451968    | 5.51498275  | 5.61980474 | 4.90655358  | 1756  | 2527  | 1400  |
| 11000     | NM_001317929.NM_024330.NR.SLC27A3       | solute carrier family 27 member 3 | solute carrier family 27 member 3    | 1.325698581  | -1.54266138  | 2.781885    | 3.692836    | 1.678366    | 3.30959645  | 3.68025029 | 2.76037376  | 350   | 620   | 279   |
| 57122     | NM_001330192.NM_002401                  | NUP107                            | nucleoporin 107                      | -1.345129354 | -1.542676776 | 31.822994   | 23.688006   | 19.385116   | 6.02629862  | 7.18109974 | 6.98486361  | 7611  | 1089  | 6068  |
| 407006    | NR_026935                               | MIR221                            | microRNA 221                         | -1.054566551 | -1.542829198 | 12.656782   | 12.284975   | 7.786608    | 1.24819466  | 1.2124797  | 1.03976801  | 54    | 69    | 43    |
| 642658    | NM_001080514.NM_001080515               | actinase bHLH transcription fact  | actinase bHLH transcription fact     | 1.958533173  | -1.542933375 | 1.204468    | 1.987903    | 1.204468    | 1.987903    | 1.987903   | 1.5580914   | 122   | 192   | 89    |
| 6103      | NM_000328.NM_001034853                  | RPGR                              | retinitis pigmentosa GTPase regn     | -1.286667698 | -1.542972314 | 2.118339    | 1.675537    | 1.31934     | 2.93507482  | 2.6243808  | 2.40804223  | 261   | 271   | 201   |
| 150465    | NM_153712                               | TTL                               | tubulin tyrosine ligase              | 1.097735868  | -1.542979031 | 6.240998    | 6.875409    | 3.80126     | 5.10749193  | 5.14761859 | 4.41525433  | 1232  | 1807  | 982   |
| 7074      | NM_003253                               | TIAM1                             | T-cell lymphoma invasion and mx      | 1.477407938  | -1.543164553 | 0.427984    | 0.632349    | 0.259091    | 2.00201503  | 2.44407994 | 1.5590879   | 118   | 233   | 94    |
| 9168      | NM_021103                               | TMSB10                            | thymosin beta 10                     | -1.127613808 | -1.543291344 | 2220.794189 | 1971.669067 | 1352.262329 | 10.02680189 | 9.85370483 | 9.40154046  | 40917 | 48483 | 32609 |
| 57333     | NM_002650                               | RCN3                              | reticulocalbin 3                     | -1.569578629 | -1.54369517  | 8.727774    | 4.286554    | 4.087927    | 3.71690001  | 3.12759409 | 3.13485876  | 407   | 406   | 380   |
| 8986      | NM_017819                               | PSMT10C                           | RNA methyltransferase 10C, mt        | 1.058533173  | -1.544045038 | 1.058533173 | 1.058533173 | 1.058533173 | 5.28739233  | 5.06485954 | 4.88036567  | 1494  | 1923  | 1160  |
| 94104     | NM_0013329.NM_016631.NR_02PAXBP1        | PAX3 and PAX7 binding protein     | PAX3 and PAX7 binding protein        | -1.141596227 | -1.544083593 | 35.682922   | 31.038732   | 21.143976   | 7.04381437  | 6.32540449 | 6.42298332  | 5141  | 6017  | 4095  |
| 27077     | NM_001243473.NM_001243475               | B9D1                              | B9 domain containing 1               | 1.2294517    | -1.544166784 | 10.22585    | 12.537707   | 6.35041     | 3.78251604  | 4.0608449  | 3.21148164  | 501   | 823   | 309   |
| 132720    | NM_152400                               | C4orf32                           | chromosome 4 open reading fram       | -1.095663185 | -1.544398829 | 7.30033     | 6.670614    | 4.438021    | 4.34933082  | 4.22426305 | 3.76020394  | 761   | 928   | 606   |
| 101929147 | NR_125974.NR_125975.NR_121LOC101929147  | ATP synthase, H+ transporting, F  | ATP synthase, H+ transporting, F     | 1.172971451  | -1.544787849 | 10.112005   | 12.195878   | 6.812382    | 4.27534593  | 4.49452466 | 3.86786049  | 721   | 1130  | 574   |
| 128434    | NM_000607                               | VSTM2L                            | V-set and transmembrane domai        | -3.551935722 | -1.545130545 | 316.882967  | 158.234602  | 191.204392  | 5.28249677  | 5.28249677 | 4.977130567 | 5927  | 5974  | 4076  |
| 56704     | NM_001317830.NM_00                      |                                   |                                      |              |              |             |             |             |             |            |             |       |       |       |

|           |                                    |                                      |              |              |            |            |            |            |             |            |       |       |       |
|-----------|------------------------------------|--------------------------------------|--------------|--------------|------------|------------|------------|------------|-------------|------------|-------|-------|-------|
| 9848      | NM_001009554.NM_001301647.MFAP3L   | microtubrillar associated protein 3  | -1.196358024 | -1.553262608 | 0.17505    | 0.154742   | 0.106324   | 1.06712766 | 0.93737891  | 0.76902392 | 43    | 48    | 34    |
| 55954     | NM_001003692.NM_00138129.ZMAF5     | zinc finger matrix-type 5            | -1.198196184 | -1.553561205 | 9.907116   | 8.665009   | 6.12367    | 3.32809988 | 3.19521507  | 2.7696269  | 355   | 348   | 281   |
| 29781     | NM_001165011.NM_00144551.MMNCAPH2  | non-SMC condensin II complex s       | 1.085365071  | 21.475994    | 19.725067  | 12.389595  | 5.9166244  | 2.389595   | 5.9166244   | 5.17814862 | 2148  | 4115  | 1700  |
| 2953      | NM_001142207.NM_005316_GTF2H1      | general transcription factor IIH s   | -1.12544521  | -1.554179405 | 17.703689  | 13.967515  | 10.839079  | 5.86125307 | 5.86125307  | 5.23874944 | 2243  | 2389  | 1775  |
| 90835     | NM_001014979.NM_001195620.CCDC189  | colled-coil domain containing 185    | 1.359376313  | -1.554332463 | 5.699677   | 7.977749   | 3.483021   | 3.17773766 | 3.57802367  | 2.62698266 | 316   | 574   | 250   |
| 55744     | NM_001321197.NM_001321198.COA1     | cytochrome c oxidase assembly i      | -1.135163839 | -1.554400453 | 46.646601  | 36.439234  | 21.604635  | 8.5745527  | 5.67790497  | 5.2347877  | 2237  | 2633  | 1770  |
| 51134     | NM_001042399.NM_001346457.CEP83    | centrosomal protein 83               | -1.234381631 | -1.554431292 | 9.030815   | 7.373434   | 5.379999   | 4.81778406 | 4.52590309  | 4.20940382 | 1068  | 1156  | 845   |
| 64689     | NM_001278789.NM_001278790.GORASP1  | golgi reassembly stacking protei     | -1.210778789 | 14.438254    | 14.438254  | 11.929604  | 8.827981   | 5.63519596 | 5.36540872  | 5.01401925 | 1912  | 2110  | 1512  |
| 4123      | NM_001256494.NM_001256495.MAN2C1   | mannosidase alpha class 2C me        | 1.109177226  | -1.555545871 | 36.205657  | 40.570354  | 21.802186  | 7.90151155 | 6.85324609  | 5.02272718 | 4500  | 6669  | 3558  |
| 30634     | NM_001278785.NM_001278786.ZNRD1    | zinc ribbon domain containing 1      | -1.342360685 | -1.555845654 | 37.717062  | 28.554504  | 19.554504  | 4.9753871  | 4.56823327  | 4.36539254 | 1198  | 1192  | 947   |
| 3291      | NM_000196                          | hydroxysteroid 11-beta dehydrog      | 1.542710047  | 2.238852     | 3.743213   | 3.743213   | 3.2579234  | 2.8811152  | 2.8811152   | 1.86820921 | 162   | 334   | 128   |
| 3552      | NM_000575                          | interleukin 1 alpha                  | 4.554536331  | -1.556638796 | 0.675119   | 3.088792   | 0.405426   | 1.55375576 | 3.29665996  | 1.16514558 | 76    | 463   | 60    |
| 124401    | NM_001242929.NM_001308089.ANK53    | ankyrin repeat and sterile alpha r   | -1.082371063 | -1.55731431  | 12.382643  | 12.922582  | 8.214321   | 5.16060006 | 5.04971445  | 4.5437825  | 1365  | 1685  | 1078  |
| 84285     | NM_001242481.NM_001242482.E1F1AD   | eukaryotic translation initiation fa | 1.035201294  | -1.557352228 | 18.462997  | 19.247855  | 11.212167  | 5.7037794  | 5.75275261  | 5.07998613 | 2007  | 2776  | 1585  |
| 10067463  | NR_037173.NR_037174.NR_03PSMB8-AS1 | PSMB8 antisense RNA 1 (head t        | -1.314650327 | 4.816599     | 3.583762   | 2.900330   | 2.86618686 | 2.53229878 | 2.3329413   | 2.3329413  | 247   | 251   | 195   |
| 83473     | NM_031363                          | katanin catalytic subunit A1 like 2  | -1.24471483  | -1.558372778 | 0.123065   | 0.103717   | 0.074526   | 0.39999002 | 0.29607837  | 0.29607837 | 14    | 15    | 11    |
| 4205      | NM_001130926.NM_001130927.MEF2A    | myocyte enhancer factor 2A           | 1.56496972   | -1.558717356 | 13.541953  | 20.641413  | 7.946257   | 6.21045    | 6.84930468  | 5.5809041  | 2868  | 5996  | 2263  |
| 55702     | NM_018074                          | colled-coil domain containing 94     | -1.201659178 | -1.558740073 | 18.424276  | 15.353435  | 11.104227  | 4.75248416 | 4.49818027  | 4.14161942 | 1019  | 1133  | 840   |
| 10012972  | NM_001134848                       | colled-coil domain containing 152    | 1.486183521  | -1.559168279 | 4.398411   | 6.45194    | 2.648527   | 3.99562394 | 4.51872225  | 4.40341396 | 3489  | 4643  | 1936  |
| 55692     | NM_001320226.NM_001330420.LUC7L    | LUC7 like                            | 1.049394106  | -1.559290376 | 48.443623  | 51.839875  | 30.704052  | 6.48974676 | 6.58584690  | 5.86778233 | 5489  | 4892  | 2752  |
| 124220    | NM_145252                          | zymogen granule protein 16B          | 1.07716898   | -1.55959785  | 2.244759   | 2.244759   | 1.237137   | 1.42282133 | 1.49109792  | 1.05442063 | 66    | 95    | 52    |
| 26039     | NM_001301778.NM_198935.NR.SS18L1   | SS18L1, nBAF chromatin remodel       | 1.02996832   | -1.559591296 | 11.555318  | 11.60627   | 7.024507   | 5.64844354 | 5.69020854  | 5.02323909 | 1930  | 2656  | 1522  |
| 84069     | NM_001160184.NM_032129_PLEKHN1     | pleckstrin homology domain cont      | -1.274645462 | -1.559640939 | 16.096999  | 12.688729  | 9.669142   | 5.24732179 | 4.90759148  | 4.62714903 | 1452  | 1522  | 1043  |
| 8208      | NM_005441                          | chromatin assembly factor 1 subu     | 1.00988474   | -1.559778384 | 20.563482  | 20.794006  | 12.392682  | 5.54362658 | 5.55751527  | 4.91944741 | 1792  | 2418  | 1413  |
| 2576      | NM_001031698.NM_012272_PRRF40B     | pre-mRNA processing factor 40 i      | -1.388717044 | -1.559831539 | 9.7257171  | 11.517691  | 5.70870626 | 5.2659901  | 5.08263362  | 4.79109626 | 2014  | 1966  | 1588  |
| 122970    | NM_152331                          | acyl-CoA thioesterase 4              | -1.169377001 | -1.559962595 | 7.419281   | 6.343842   | 4.458287   | 3.47048058 | 3.90742492  | 3.6474087  | 463   | 529   | 365   |
| 8008      | NM_003097                          | immediate early response 3           | ER3          | 160.890349   | 180.741513 | 160.890349 | 160.741513 | 7.85139947 | 6.98539844  | 6.02899698 | 7597  | 8828  | 5989  |
| 8608      | NM_005631                          | smoothed, flattened class recep      | -1.307370862 | -1.560262288 | 0.325498   | 0.247671   | 0.194715   | 1.13562816 | 0.93737891  | 0.82068496 | 407   | 428   | 307   |
| 57542     | NM_020782                          | kelch like family member 42          | -1.23669591  | -1.560429235 | 10.059236  | 8.143038   | 6.057215   | 6.008364   | 5.70715386  | 5.37889138 | 2488  | 2688  | 1961  |
| 22989     | NM_014981                          | myosin heavy chain 15                | 1.302368844  | -1.56081541  | 10.032103  | 13.080979  | 6.040602   | 6.13140667 | 6.50777196  | 5.5006905  | 4721  | 2138  | 1384  |
| 79053     | NM_001007027.NM_024079_ALG8        | ALG8, alpha-1,3-glucosyltransfer     | -1.29536011  | -1.561394252 | 6.460267   | 5.041551   | 38.974428  | 6.74229857 | 6.37290924  | 6.10688744 | 4164  | 4295  | 3280  |
| 445571    | NM_001259121.NM_013633_C8WD3       | COBOW domain containing 3            | -1.195420397 | -1.561489532 | 23.395527  | 19.600737  | 14.091337  | 5.31257643 | 5.06211622  | 4.68982427 | 1521  | 1700  | 1198  |
| 65904     | NM_001161485.NM_012306_TURND1      | turmuri domain containing 1          | 1.047917924  | -1.563577929 | 6.468144   | 14.011541  | 6.309097   | 5.17832262 | 5.17832262  | 4.7832262  | 1035  | 1035  | 789   |
| 91612     | NM_001204063.NM_001204064.CHURC1   | churchill domain containing 1        | -1.061816102 | -1.562214453 | 16.597526  | 15.600512  | 9.97482    | 5.88445448 | 5.79942543  | 5.25448848 | 2280  | 2869  | 1795  |
| 100131801 | NM_001171155.NR_033242_PET100      | PET100 homolog                       | -1.423375328 | -1.562288603 | 120.749819 | 85.229673  | 72.546708  | 5.3820734  | 4.88729042  | 4.75767981 | 1598  | 1500  | 1258  |
| 6198      | NM_001272042.NM_001272043.RPS6K81  | ribosomal protein S6 kinase B1       | -1.213014763 | -1.562510647 | 12.724441  | 18.742267  | 13.304583  | 6.9045776  | 6.62442377  | 6.26334948 | 4051  | 5123  | 3661  |
| 387066    | NR_003038                          | SNHG5                                | -1.306904142 | -1.562769313 | 55.465477  | 42.489506  | 33.851243  | 4.82687594 | 4.221107796 | 4.06810796 | 1075  | 1099  | 846   |
| 51174     | NM_001193609.NM_001193610_CJUSD1   | ubulin delta 1                       | -1.19854556  | -1.562908012 | 6.704952   | 6.704952   | 4.49029027 | 4.49029027 | 4.49029027  | 4.49029027 | 732   | 816   | 576   |
| 140711    | NM_001304783.NM_080628_TLDC2       | TBC1LemA-associated domain cc        | -1.033919649 | -1.563019636 | 0.515689   | 0.037533   | 0.306242   | 1.04948198 | 0.13134883  | 0.17538414 | 42    | 5     | 3     |
| 7923      | NM_014234                          | hydroxysteroid 17-beta dehydrog      | -6.839283628 | -1.56303332  | 2.701123   | 0.391208   | 1.617034   | 1.8573935  | 0.46599441  | 0.42061731 | 103   | 20    | 81    |
| 1774      | NM_001009932.NM_001009933.DNAESL11 | deoxyribonuclease 1 like 1           | -1.173251705 | -1.563116933 | 11.416444  | 9.920171   | 7.015145   | 5.09528557 | 4.87328317  | 4.47558749 | 1485  | 1485  | 1026  |
| 55269     | NM_001042414.NR_003272.NR.PSPC1    | paraspacc component 1                | 1.191507306  | -1.563234485 | 29.692408  | 35.873788  | 17.741177  | 6.19025398 | 5.30976834  | 5.30976834 | 2304  | 3708  | 1867  |
| 7743      | NM_001278231.NM_001278232.ZNF189   | zinc finger protein 189              | 1.205540972  | -1.563463932 | 11.784282  | 14.314879  | 7.183851   | 5.26176079 | 5.52503349  | 4.63798828 | 1467  | 2363  | 1154  |
| 51918     | NM_001308185.NM_020307_GALNT1      | galactose-4-epimerase 1              | -1.134146713 | -1.563303448 | 32.930348  | 32.930348  | 12.021437  | 6.21071921 | 6.21071921  | 6.21071921 | 15341 | 18073 | 18073 |
| 83538     | NM_001350319.NM_0013421.NRTTCC25   | tetratricopeptide repeat domain 2    | 1.458002972  | -1.563605937 | 4.489094   | 0.703707   | 0.289068   | 1.62195412 | 0.93445895  | 0.93445895 | 546   | 109   | 44    |
| 27332     | NM_001014972.NM_001252612.ZNF638   | zinc finger protein 638              | 1.06388365   | -1.563805291 | 34.205724  | 36.396765  | 20.547386  | 7.76506983 | 7.85401302  | 7.1237327  | 8501  | 12084 | 6686  |
| 100158262 | NR_023358                          | small Cajal body-specific RNA 9-     | -1.668446201 | -1.563958304 | 5.20278    | 3.138111   | 3.115276   | 1.47662927 | 1.04792463  | 1.09694451 | 70    | 56    | 55    |
| 57602     | NM_001321291                       | cytochrome specific peptidase 36     | -1.143677788 | -1.563991382 | 25.338511  | 22.179041  | 7.20042592 | 6.0081051  | 6.56069931  | 5.735      | 6700  | 7000  | 4510  |
| 51287     | NM_016565                          | ubiquitin c oxidase assembly i       | 1.09839381   | -1.564083756 | 73.194649  | 80.50647   | 43.972076  | 5.88694053 | 6.02016213  | 5.25527094 | 2284  | 3362  | 1796  |
| 55133     | NM_001303422.NM_004490_GRSB2       | growth factor receptor bounde        | -1.09892224  | -1.56420819  | 3.089224   | 3.089224   | 1.5326819  | 3.089224   | 3.089224    | 3.089224   | 463   | 674   | 384   |
| 4673      | NM_001307924.NM_001330231.NAP1L1   | nucleosome assembly protein 1        | -1.26356492  | -1.564601034 | 149.604769 | 120.586958 | 91.469164  | 9.35050934 | 9.01303616  | 8.70550857 | 25582 | 27049 | 20110 |
| 51236     | NM_016458.NM_016458_dup1_HGH1      | HGH1 homolog                         | -1.051990144 | -1.564784914 | 4.240415   | 4.035706   | 2.550158   | 3.51962058 | 3.45300696  | 2.94281592 | 411   | 522   | 322   |
| 127602    | NM_001145154.NM_001349911.DNAH14   | dynein axonemal heavy chain 14       | -1.45508614  | -1.564790727 | 26.394626  | 15.90934   | 20.283651  | 5.61359342 | 5.13436815  | 4.84412333 | 1883  | 1790  | 1480  |
| 83937     | NM_032023                          | Ras association domain family m      | -1.642448707 | -1.564827549 | 1.900987   | 1.155023   | 1.140332   | 2.49460548 | 1.93409799  | 1.98602166 | 182   | 148   | 143   |
| 6941      | NM_000717511.NM_001318908.TCF19    | transcription factor 19              | -1.095780383 | -1.565218671 | 12.447106  | 11.727192  | 7.650645   | 5.35987438 | 5.5232675   | 4.73317556 | 1573  | 1918  | 1236  |
| 513647    | NM_018079                          | S1 RNA binding domain 1              | -1.251927049 | -1.565897305 | 5.405296   | 6.77784    | 3.242185   | 4.6846589  | 4.6846589   | 4.6846589  | 604   | 604   | 478   |
| 23098     | NM_015077                          | sterile alpha and TIR motif contai   | 1.641570436  | -1.566024997 | 1.016337   | 0.671856   | 0.608507   | 3.04155747 | 2.84        | 1.7001707  | 623   | 623   | 223   |
| 59565     | NM_001323515.NM_001323516.PARP6    | poly(ADP-ribose) polymerase far      | -1.296807427 | -1.566093492 | 27.071025  | 20.53715   | 16.038403  | 6.18794463 | 5.81904452  | 5.55190154 | 2823  | 2909  | 2217  |
| 100029145 | NM_001083585.NM_001291581.RABEP1   | rabaptin, RAB GTPase binding e       | -1.022745887 | -1.566128849 | 7.713899   | 8.837575   | 5.869421   | 5.16981689 | 5.13827799  | 4.54506286 | 1274  | 1795  | 1059  |
| 5103      | NR_037709                          | TEN1-CDK3 readthrough (NMD i         | -1.43236229  | -1.566259597 | 12.979078  | 9.075542   | 7.792028   | 5.4297412  | 4.92860232  | 4.60119389 | 1653  | 1542  | 1298  |
| 23361     | NM_0017822                         | KAT7 regulatory NSL complex s        | -1.162618512 | -1.566268978 | 21.766136  | 23.969794  | 16.655782  | 6.55262638 | 6.82001899  | 6.39856596 | 2533  | 2533  | 1943  |
| 51003     | NM_010600                          | mediator complex subunit 31          | -1.01496338  | -1.566350681 | 5.217134   | 5.217134   | 3.17303    | 3.25293023 | 3.23732717  | 2.68852679 | 353   | 441   | 263   |
| 4172      | NM_001080417.NM_001345970.ZNF629   | zinc finger protein 629              | 1.10463801   | -1.566774626 | 9.711201   | 10.74468   | 5.815135   | 6.85709343 | 6.01634318  | 5.24112127 | 2265  | 3343  | 1778  |
| 10622     | NM_000647                          | minichromosome maintenance co        | 1.180128853  | -1.566865344 | 43.791708  |            |            |            |             |            |       |       |       |

|           |                                   |                           |                                      |               |              |            |            |            |             |             |            |       |       |       |
|-----------|-----------------------------------|---------------------------|--------------------------------------|---------------|--------------|------------|------------|------------|-------------|-------------|------------|-------|-------|-------|
| 144165    | NM_001144881.NM_001144882         | PRICKLE1                  | prickle planar cell polarity protein | 1.131361507   | -1.57396842  | 2.849823   | 3.280117   | 1.727294   | 3.70009475  | 3.86524379  | 3.10785943 | 471   | 712   | 368   |
| 27122     | NM_001180507.NM_001330220         | PRKX                      | dickkopf WNT signaling pathway       | -1.449488876  | -1.574029347 | 3.414902   | 2.354439   | 2.054723   | 3.31698997  | 2.83174937  | 2.74309688 | 371   | 821   | 275   |
| 25624     | NM_012094.NM_181651.NM_18PRDK3    | peroxiredoxin 5           | peroxiredoxin 5                      | -1.258839702  | -1.574067631 | 240.009184 | 191.20147  | 142.547030 | 7.385743371 | 7.385743371 | 7.06358242 | 8205  | 3708  | 6411  |
| 2275      | NM_01243878.NM_004466             | PHL3                      | four and a half LIM domains 3        | 1.914030942   | -1.574152493 | 3.657308   | 7.113888   | 2.181152   | 2.78347855  | 3.62781914  | 2.25371152 | 233   | 596   | 182   |
| 399844    | NR_028324                         | LINC01002                 | long intergenic non-protein codin    | 1.072902442   | -1.574691523 | 19.31308   | 20.869558  | 11.524414  | 6.53403852  | 6.64280604  | 5.88736037 | 3599  | 5190  | 2811  |
| 23288     | NM_001287499.NM_001287500         | IQCE                      | IQ motif containing E                | -1.219509838  | -1.574977499 | 5.419932   | 4.274632   | 3.616595   | 4.95916039  | 4.68297626  | 4.33017765 | 1182  | 1295  | 923   |
| 7701      | NM_001105537.NR_073599.NR_ZNF142  | RPTOR                     | zinc finger protein 142              | -1.100473395  | -1.575031599 | 6.886754   | 4.711347   | 4.781347   | 5.54834575  | 5.41330708  | 4.91053445 | 1798  | 2183  | 1404  |
| 57521     | NM_001163034.NM_0020761           | ZFAND2A                   | regulatory associated protein of 9   | 1.035317795   | -1.575217079 | 12.390857  | 12.845111  | 7.582707   | 6.43716284  | 6.36787645  | 5.74197396 | 3248  | 4493  | 2536  |
| 959637    | NM_182491                         | TFAM                      | zinc finger ANH-type containing 2    | -1.738948346  | -1.575254466 | 16.533743  | 9.5892585  | 9.854655   | 3.95950014  | 3.95950014  | 3.35270793 | 570   | 440   | 145   |
| 646405    | NR_026730                         | TFE2T2                    | transmembrane phosphoinositide       | 2.237343432   | -1.57567542  | 0.162404   | 0.162404   | 0.043174   | 0.05646555  | 1.02107213  | 0.36729312 | 54    | 18    | 54    |
| 2253      | NM_001206389.NM_006119.NMFGF8     | NMFGF8                    | fibroblast growth factor 8           | -3.386985956  | -1.57567542  | 0.45404    | 0.125887   | 0.251773   | 0.54446555  | 0.18071335  | 0.36729312 | 18    | 7     | 14    |
| 124512    | NM_001080510.NM_001206983         | METTL23                   | methyltransferase like 23            | -1.393757197  | -1.576291375 | 55.306755  | 38.400289  | 32.957354  | 5.86441029  | 5.39512262  | 5.22203654 | 2248  | 2155  | 1754  |
| 219844    | NM_001134793.NM_145014            | HYL51                     | HYL51, centriolar and cillogenies    | -1.879387395  | -1.576526214 | 18.992237  | 9.565745   | 11.318432  | 5.18302698  | 4.30717831  | 4.54889714 | 1387  | 986   | 1082  |
| 100506860 | NR_109780                         | LINC00513                 | long intergenic non-protein codin    | 1.146747542   | -1.577090716 | 2.114302   | 2.348751   | 1.254713   | 1.56621863  | 1.70021226  | 1.16514558 | 77    | 118   | 60    |
| 11120     | NM_016100.NM_181527.NM_18MAA20    | MAA20                     | N(omega)-acetyltransferase 20, N     | 1.107297208   | -1.577108319 | 141.259659 | 156.631319 | 84.027705  | 7.37489802  | 6.57706411  | 5.77706411 | 5650  | 8655  | 4562  |
| 10220     | NM_005511                         | GDF11                     | growth differentiation factor 11     | 1.05369818    | -1.577302837 | 1.871947   | 3.12816416 | 2.93557    | 3.19521507  | 2.96289567  | 2.737      | 304   | 428   | 237   |
| 51622     | NM_015622                         | CC21                      | CC21 homolog, vacuolar protein       | -1.280687368  | -1.577404589 | 36.451508  | 28.492872  | 21.710892  | 6.03866537  | 5.68807631  | 5.39399141 | 2542  | 2652  | 1982  |
| 126075    | NM_001080503                      | CCDC159                   | coiled-coil domain containing 155    | -1.147834828  | -1.57743554  | 9.145712   | 7.979549   | 3.38891307 | 3.21015128  | 2.80852903  | 2.737      | 433   | 290   | 528   |
| 25915     | NM_199069.NM_199070.NM_19NDUF4F3  | NDUF4F3                   | NADH:ubiquinone oxidoreductas        | -1.090326049  | -1.577439154 | 22.356085  | 20.697307  | 13.323646  | 4.95679582  | 4.83621478  | 4.32571472 | 1180  | 1446  | 920   |
| 101929099 | NR_110786                         | LLOC101929099             | uncharacterized LOC101929099         | -1.201549603  | -1.577553076 | 0.380052   | 0.315557   | 0.223281   | 0.7590755   | 0.65251278  | 0.52094563 | 27    | 30    | 21    |
| 378108    | NM_001317815.NM_198853            | TRIM74                    | tripartite motif containing 74       | 1.12228154    | -1.578496505 | 0.681469   | 0.773082   | 0.410325   | 0.93862015  | 1.02107213  | 0.65979727 | 36    | 54    | 28    |
| 221786    | NM_145111                         | FAM200A                   | family with sequence similarity 20   | -1.064527769  | -1.57869511  | 3.089218   | 2.901615   | 1.839039   | 3.08551061  | 3.00618294  | 2.52166171 | 294   | 369   | 229   |
| 57228     | NM_001031628.NM_001033873         | SMAGP                     | small cell adhesion glycoprotein     | -1.825373283  | -1.579171021 | 23.642423  | 14.094982  | 4.6997269  | 3.87652288  | 4.07226969  | 3.787      | 981   | 718   | 764   |
| 401397    | NR_015442.NR_024412               | LINC00998                 | long intergenic non-protein codin    | -1.468110189  | -1.57933956  | 34.254932  | 23.463715  | 20.460364  | 5.19711926  | 4.66140215  | 4.56033921 | 1401  | 1275  | 1091  |
| 397       | NM_001175.NM_001321420.NMARAHDGB  | NMARAHDGB                 | Rho GDP dissociation inhibitor b     | -1.804214296  | -1.579807074 | 118.408702 | 70.288052  | 7.2846185  | 6.40649094  | 6.63020989  | 6.082      | 4504  | 4035  | 4735  |
| 91978     | NM_0035313                        | TPGS1                     | tubulin polyglutamylase complex      | 1.080393125   | -1.580069526 | 6.025181   | 6.159994   | 3.581807   | 2.91572639  | 3.01302298  | 2.36229074 | 257   | 371   | 200   |
| 646457    | NM_001193480.NM_0022568           | NM148A1                   | aldehyde dehydrogenase 8 family      | 1.36134554    | -1.58013754  | 0.781501   | 0.818907   | 1.59020051 | 1.91502051  | 2.19658465  | 1.90420051 | 188   | 81    | 188   |
| 28818     | NR_000200                         | SNORD33                   | small nucleolar RNA, CID box 33      | -1.61400176   | -1.58007554  | 25.262499  | 15.804755  | 14.978681  | 1.61502051  | 1.18729361  | 1.20457043 | 81    | 67    | 63    |
| 4254      | NM_000899.NM_003994               | KITLG                     | KIT ligand                           | 1.446043508   | -1.580110129 | 1.276581   | 1.846479   | 0.758345   | 2.95890107  | 3.43277448  | 2.40240201 | 266   | 514   | 207   |
| 2013      | NM_001424                         | EMP2                      | epithelial membrane protein 2        | -1.031317498  | -1.580233322 | 17.123798  | 16.621828  | 10.183556  | 6.45874884  | 6.41477249  | 5.8079893  | 3414  | 4423  | 2657  |
| 29904     | NM_013302                         | EEF2K                     | eukaryotic elongation factor 2 kin   | 1.634187589   | -1.580818746 | 5.230214   | 8.550802   | 3.108611   | 5.27605672  | 5.97014822  | 4.63678882 | 1427  | 1382  | 1153  |
| 144455    | NM_003594                         | EEF7                      | E2F transcription factor 7           | 1.03407505    | -1.580858536 | 5.496396   | 5.696136   | 3.26591    | 4.98839509  | 5.03636731  | 4.35374951 | 1280  | 1669  | 939   |
| 70338     | NM_001256336.NM_001256337         | CHD1L                     | chromodomain helicase DNA bin        | -1.4422383213 | -1.58115873  | 14.882114  | 12.636571  | 14.882114  | 5.959415873 | 5.959415873 | 5.23042225 | 1402  | 1402  | 2225  |
| 100630923 | NR_038967                         | LLOC100630923             | LLOC100289561-PRKRP1 readt           | -1.350523287  | -1.581610673 | 4.154928   | 3.186759   | 2.471301   | 3.67720659  | 3.32712361  | 3.07986458 | 463   | 474   | 360   |
| 3028      | NM_001037811.NM_004493            | HSD17B10                  | hydroxysteroid 17-beta dehydro       | 1.0749005     | -1.581729311 | 40.737546  | 43.820934  | 24.16851   | 5.29021237  | 5.39185113  | 4.64993924 | 1497  | 2150  | 1164  |
| 100652748 | NM_001290117.NM_001290118         | TIMM23B                   | translocase of inner mitochondrial   | -1.343128227  | -1.58177591  | 11.728232  | 9.632929   | 5.12944497 | 4.71782899  | 4.49161333  | 4.1335     | 1346  | 1328  | 1038  |
| 54093     | NM_001007259.NM_001007261         | SETD4                     | SET domain containing 4              | -1.069622568  | -1.581891981 | 12.243632  | 11.33407   | 7.720429   | 5.25984392  | 5.16535412  | 4.61987668 | 1435  | 1830  | 1139  |
| 70338     | NM_004208                         | HNRN37                    | mitochondrial ribosomal protein      | -1.12338921   | -1.58198122  | 20.187952  | 17.989128  | 11.989238  | 5.59843378  | 5.59843378  | 5.09492338 | 2049  | 2049  | 1363  |
| 101927597 | NR_110175.NR_110176.NR_11NCK1-AS1 | NCK1                      | NCK1 antisense RNA 1 (head to        | -1.217657765  | -1.582047192 | 4.463349   | 3.769607   | 2.747125   | 2.48422539  | 2.2203867   | 1.93223726 | 175   | 192   | 136   |
| 26999     | NM_001037333.NM_001291721         | CYFIP2                    | cytoplasmic FMR1 interacting pr      | 1.217948371   | -1.582651728 | 0.370373   | 0.450953   | 0.220331   | 1.76310734  | 1.96964178  | 1.73870978 | 94    | 153   | 73    |
| 55937     | NM_001256169.NM_0019101           | NRAPOM                    | apolipoprotein M                     | -1.194323692  | -1.582960987 | 2.672053   | 2.230659   | 1.554092   | 1.58978355  | 1.58978355  | 1.15176086 | 76    | 85    | 59    |
| 9856      | NM_001168374.NM_001168375         | KIAA0319                  | KIAA0319                             | -2.480790751  | -1.583177898 | 0.098754   | 0.151133   | 0.75384785 | 1.03478475  | 1.05442063  | 0.78       | 36    | 52    | 36    |
| 11266     | NM_007240                         | DUSP12                    | dual specificity phosphatase 12      | -1.085211672  | -1.583253029 | 25.648111  | 23.677052  | 15.225531  | 5.03733324  | 4.9230658   | 4.39976838 | 1250  | 1539  | 971   |
| 283735    | NR_026432                         | NSN                       | nestin domain and RLD 2 pseudog      | -1.239475136  | -1.583344561 | 4.830625   | 4.291546   | 3.73715447 | 3.73715447  | 3.47039337  | 3.67       | 647   | 647   | 497   |
| 5479      | NM_000942                         | PIPB                      | peptidyl/prolyl isomerase B          | -1.151673929  | -1.583388112 | 846.925659 | 736.188477 | 502.623596 | 9.72704727  | 9.52590908  | 9.09770478 | 33280 | 38610 | 25851 |
| 11021     | NM_001167606.NM_008681            | RAB35                     | RAB35, member RAS oncogene           | -1.193943545  | -1.58391893  | 17.709502  | 14.868267  | 10.486711  | 5.68604484  | 5.43572001  | 5.03877083 | 1982  | 2218  | 1539  |
| 64221     | NM_002370                         | ROBO3                     | roundabout guidance receptor 3       | -2.369881359  | -1.583995603 | 3.696106   | 1.558878   | 2.192374   | 2.98550663  | 3.5052118   | 3.66919325 | 644   | 363   | 500   |
| 56160     | NM_138704                         | NSMCE                     | NSE3 homolog, SMCS-SMC6 co           | 1.07798850    | -1.583996998 | 11.418266  | 6.781995   | 4.29045667 | 4.39345927  | 4.39345927  | 3.66919325 | 729   | 1050  | 566   |
| 54939     | NM_001284377.NM_001284378         | COMMD domain containing 4 | COMMD domain containing 4            | -1.197781871  | -1.583998533 | 98.09185   | 80.344988  | 57.807225  | 6.54549243  | 6.28817029  | 5.89088728 | 3628  | 4047  | 2817  |
| 64928     | NM_00102490                       | NDUFA16                   | NADH:ubiquinone oxidoreductas        | -1.36198476   | -1.584004784 | 35.919499  | 28.945602  | 24.984605  | 5.232726284 | 5.232726284 | 4.58095095 | 2344  | 2344  | 1924  |
| 3995      | NM_021727                         | FADS3                     | fatty acid desaturase 3              | 1.26011398    | -1.584127153 | 13.89776   | 17.282026  | 8.123098   | 4.63907592  | 4.96065652  | 4.00872756 | 939   | 1581  | 729   |
| 149076    | NM_152493                         | ZNF362                    | zinc finger protein 362              | -1.152629129  | -1.584474409 | 10.688062  | 9.277502   | 6.352226   | 5.05843928  | 4.86008588  | 4.41944907 | 1269  | 1471  | 985   |
| 54675     | NM_001127458.NM_001323561         | CLRS1                     | cardiolipin synthase 1               | -1.142233792  | -1.584567443 | 15.207518  | 17.141524  | 8.706846   | 5.84408369  | 6.03281945  | 5.19456023 | 2216  | 3382  | 1720  |
| 8449      | NM_001164239.NM_003587            | DXH16                     | DEAH-box helicase 16                 | -1.169433876  | -1.584810019 | 9.764507   | 8.316476   | 5.722622   | 5.06723449  | 4.84867703  | 4.42780217 | 1477  | 1459  | 991   |
| 2526      | NM_002033                         | FUT4                      | fucosyltransferase 4                 | -2.637758991  | -1.584868142 | 2.372275   | 0.899043   | 0.406235   | 3.90531607  | 2.65526948  | 2.39604105 | 549   | 278   | 426   |
| 64928     | NM_001318767.NM_001318768         | NRPL4                     | mitochondrial ribosomal protein L    | -1.33819412   | -1.58615822  | 49.396947  | 23.42626   | 29.570116  | 6.6306168   | 6.51500737  | 6.38361692 | 678   | 4745  | 5874  |
| 339559    | NM_001320178.NM_001320179         | ZFP69                     | zinc finger protein 69               | -1.446404028  | -1.584938555 | 4.641829   | 3.369072   | 2.739513   | 3.02658682  | 3.02113909  | 2.601      | 508   | 375   | 315   |
| 116461    | NM_001127394.NM_001300764         | TSEN15                    | RNA splicing endonuclease sub        | 1.009935214   | -1.585132289 | 33.125113  | 33.673597  | 19.786818  | 6.00950526  | 6.02354829  | 5.35791727 | 2490  | 3360  | 1932  |
| 80067     | NM_001164821.NM_002500.NR_DCAF17  | DCAF17                    | DDI1 and CUL4 associated fact        | -1.015092853  | -1.585560031 | 5.175225   | 0.303403   | 0.47796738 | 4.89885139  | 4.26173929  | 4.877      | 1490  | 878   | 1490  |
| 6627      | NM_003090.NR_135506.NR_13SNRPA1   | SNRPA1                    | small nuclear ribonucleoprotein      | 1.122648768   | -1.585835294 | 109.704166 | 123.391332 | 65.244572  | 6.5244572   | 7.02450843  | 6.20095573 | 4518  | 6777  | 3504  |
| 10330     | NM_001190991.NM_0014255           | CNPY2                     | cansly FGF signaling regulator 2     | -1.585888629  | -1.585888629 | 48.227701  | 48.227701  | 6.85397785 | 6.85397785  | 6.85397785  | 5.9797338  | 3867  | 4157  | 2867  |
| 539       | NR_001697                         | ATF50                     | ATP synthase, H+ transporting, r     | -1.75173457   | -1.586016131 | 216.57457  | 128.29715  | 7.41       |             |             |            |       |       |       |

|           |                                |               |                                     |               |              |            |            |            |             |            |            |       |       |       |
|-----------|--------------------------------|---------------|-------------------------------------|---------------|--------------|------------|------------|------------|-------------|------------|------------|-------|-------|-------|
| 692088    | NR_003044                      | SNORD50B      | small nuclear RNA, C/D box 50       | 1.011381444   | -1.59531796  | 26.912806  | 27.53138   | 15.960508  | 1.5392062   | 1.12461302 | 74         | 100   | 57    |       |
| 203       | NM_000476,NM_001318121,NMAK1   |               | adenylate kinase 1                  | 1.11060598    | -1.595784467 | 16.869247  | 18.747992  | 9.937972   | 5.25600252  | 5.40393992 | 1461       |       | 1126  |       |
| 23360     | NM_001318339,NM_015308         | FNBP4         | formin binding protein 4            | 1.891591663   | -1.595795578 | 53.722829  | 31.804117  | 31.641599  | 7.77751671  | 7.70714186 | 8575       | 6773  | 6609  |       |
| 7136      | NM_001145829,NM_001145841      | TNNI2         | troponin I2, fast skeletal type     | 1.08438601    | -1.595949315 | 10.897443  | 11.82805   | 3.2360287  | 3.2360287   | 2.5525408  | 305        |       | 236   |       |
| 8811      | NM_003857                      | GALR2         | galanin receptor 2                  | -3.4505858    | -1.59615765  | 0.750154   | 0.216529   | 0.436059   | 0.99521185  | 0.36283659 | 0.69713258 | 39    | 15    | 30    |
| 53944     | NM_001329605,NM_001329606      | CSNK1G1       | casein kinase 1 gamma 1             | -2.337510947  | -1.596269322 | 4.205515   | 2.771349   | 3.265533   | 5.09974705  | 3.92982892 | 4.44848345 | 1307  | 747   | 1007  |
| 5514      | NM_002714,NM_07_29994          | PPP1R10       | protein phosphatase 1 regulatory    | -1.129647206  | -1.596458454 | 26.650899  | 23.53823   | 15.633452  | 6.90199491  | 6.7276815  | 6.23427685 | 4656  | 5507  | 3587  |
| 55180     | NM_001040416                   | LINS1         | lines homolog 1                     | 1.446595976   | -1.596533345 | 8.835019   | 12.970644  | 9.1579569  | 4.49984402  | 5.03133013 | 3.86234009 | 849   | 1663  | 654   |
| 55534     | NM_001126998,NM_001129899      | KRBDY4        | KRAB box domain containing 4        | 1.056969894   | -1.596702399 | 4.334583   | 4.110325   | 2.541622   | 3.440394985 | 2.54113909 | 409        | 517   | 315   |       |
| 55520     | NM_018696                      | ELAC1         | elac ribonuclease 1                 | 1.03458242    | -1.597607618 | 2.3815942  | 2.468023   | 1.399772   | 2.67826779  | 2.68732465 | 2.88792465 | 186   |       | 157   |
| 11006323  | NR_146336,NR_146336_dup1       | PKD1PA-NP1PA8 | PKD1PA-NP1PA8 readthrough           | -1.297265877  | -1.597698286 | 11.439587  | 8.829259   | 6.727433   | 6.32396917  | 5.95382375 | 5.65686718 | 3106  | 3199  | 2391  |
| 337873    | NR_036461                      | HIST2H2BC     | histone cluster 2 H2B family men    | 1.472021206   | -1.597817345 | 10.898306  | 16.03735   | 6.39435    | 2.84588727  | 3.33804373 | 2.28470378 | 243   | 478   | 187   |
| 2057      | NM_000121,NR_033663            | EPOR          | erythropoietin receptor             | 1.012230469   | -1.597896385 | 13.515212  | 13.586404  | 7.950625   | 5.15442263  | 5.17472225 | 4.50219918 | 1359  | 1838  | 1046  |
| 92399     | NM_001173512,NM_001346339      | MRRF          | mitochondrial ribosome recycling    | 1.019545869   | -1.597949308 | 20.961041  | 21.442072  | 12.574034  | 6.38942989  | 6.41702723 | 5.72343286 | 3252  | 4430  | 2503  |
| 55658     | NM_001252377,NM_014595,NR.NT5C | PF126         | 5'-3'-nucleotidase, cytosolic       | 1.27420276    | -1.598491525 | 98.323525  | 29.16038   | 58.000338  | 6.20589687  | 5.8838209  | 3643       | 3282  | 2803  |       |
| 23242     | NM_001287436,NM_001287438      | COBL          | ring finger protein 126             | 1.07033862    | -1.598537831 | 38.009125  | 40.758489  | 22.349014  | 5.95605007  | 6.05325718 | 5.29310088 | 3358  | 3431  | 1845  |
| 3725      | NM_002228                      | JUN           | cordon-bleu WH2 repeat protein      | -14.42916746  | -1.599009174 | 2.771136   | 0.188776   | 1.620128   | 3.93924856  | 0.99371033 | 3.31718716 | 563   | 52    | 433   |
| 64897     | NM_01286191,NM_001286192       | C12orf43      | Jun proto-oncogene, AP-1 trans      | 1.209029434   | -1.599027924 | 104.806694 | 126.858116 | 61.594772  | 8.40980188  | 8.68291966 | 7.73513835 | 13313 | 21506 | 10240 |
| 22873     | NM_014934,NM_199898            | DZIP1         | chromosome 12 open reading fr       | -1.23118039   | -1.599593956 | 10.427884  | 8.509299   | 6.135732   | 4.46742999  | 4.75520813 | 4.10909358 | 1021  | 1108  | 785   |
| 605553    | NR_103552                      | C6orf49       | DAZ interacting zinc finger protei  | 1.408824187   | -1.600135316 | 0.149090   | 0.210119   | 0.086892   | 1.06712766  | 1.34717796 | 0.75138414 | 43    | 81    | 33    |
| 29004     | NM_001145520,NM_001145521      | RA1A          | chromosome 8 open reading fra       | -3.80349358   | -1.600135316 | 0.565954   | 0.149203   | 0.326119   | 1.06712766  | 0.36283659 | 0.75138414 | 43    | 15    | 33    |
| 9636      | NR_002562                      | SNORD28       | retinoic acid induced 14            | -1.05187412   | -1.600483251 | 2.864671   | 2.723808   | 1.672972   | 3.89300127  | 3.8295077  | 3.27149895 | 544   | 691   | 418   |
| 51693     | NM_001318524,NM_001318525      | TRAPPC2L      | small nuclear RNA, C/D box 28       | 1.131520289   | -1.600615554 | 43.539963  | 49.235645  | 25.37916   | 2.0648444   | 2.20257223 | 1.57922529 | 125   | 189   | 96    |
| 51282     | NM_016558,NM_033630            | SCAND1        | trafficking protein particle comple | -1.352218904  | -1.600656941 | 18.489062  | 13.460052  | 10.628783  | 5.37766084  | 4.95446982 | 4.71963207 | 1593  | 1574  | 1224  |
| 101928649 | NR_109909                      | CTC-338M12.4  | SCAN domain containing 1            | -1.369409187  | -1.600895299 | 34.831519  | 47.678234  | 27.96979   | 5.42204799  | 4.9808379  | 3.76319139 | 1644  | 1604  | 1263  |
| 51236     | NM_016429                      | COTF2         | uncharacterized LOC101928649        | 1.013278328   | -1.601293031 | 19.69482   | 19.978277  | 11.555187  | 4.35283189  | 4.37103944 | 3.75146114 | 763   | 1033  | 586   |
| 387787    | NM_00144869,NM_001329941       | L1PT2         | collamer protein complex sub 12     | 1.02494137    | -1.60247812  | 2.407153   | 2.407153   | 1.2075347  | 2.14035152  | 1.70021226 | 1.97845985 | 118   | 118   | 142   |
| 100996579 | NR_110163,NR_110164            | LINC01806     | lipo[ol(canoyl)] transferase 2 (pu  | 1.10226409    | -1.604804751 | 1.590669   | 0.846824   | 2.09955541 | 2.20853486  | 1.60891398 | 1.296      | 190   | 99    | 190   |
| 4693      | NM_000266                      | NDP           | long intergenic non-protein codin   | 1.618991801   | -1.601826624 | 0.809473   | 1.302763   | 0.464828   | 1.51570785  | 2.0043309  | 1.11084509 | 73    | 158   | 56    |
| 727896    | NR_026859                      | LOC727896     | NDP, norrio cystine knot growth i   | 3.200016476   | -1.601991681 | 0.209081   | 0.705244   | 0.11981    | 0.5190475   | 1.25799553 | 0.34394329 | 17    | 73    | 33    |
| 64078     | NM_032478                      | MRRF.38       | cysteine and histidine rich domai   | -1.6161141504 | -1.601991681 | 0.129055   | 0.072781   | 0.072781   | 0.3412894   | 0.34394329 | 0.34394329 | 17    | 14    | 13    |
| 119559    | NM_012349,NR_110305            | SFXF1         | mitochondrial ribosomal protein     | -1.226804971  | -1.602694186 | 89.340164  | 72.894186  | 52.398198  | 7.10881948  | 6.81600722 | 6.43471382 | 5379  | 5858  | 4129  |
| 100288198 | NR_040671                      | HMGN3-AS1     | sideroflexin 4                      | 1.025317413   | -1.603172713 | 20.165743  | 20.165743  | 18.601299  | 4.84840899  | 4.84840899 | 4.84840899 | 1065  | 1459  | 877   |
| 51009     | NM_001304777,NM_001304779      | DERL2         | HMGN3 antisense RNA 1               | 1.241532752   | -1.603437535 | 0.406665   | 0.509797   | 0.236651   | 1.13562816  | 1.31437719 | 0.80366963 | 47    | 78    | 36    |
| 9636      | NM_005101                      | ISG15         | derlin 2                            | -1.099815756  | -1.60351685  | 7.997906   | 7.149446   | 4.59747    | 5.05512721  | 4.92217849 | 4.39976838 | 1266  | 1538  | 971   |
| 51728     | NM_016310                      | POLRK         | ISG15 ubiquitin-like modifier       | -1.531713115  | -1.603610188 | 258.047882 | 188.656235 | 151.209198 | 7.3952786   | 6.78469693 | 6.71910401 | 6570  | 5731  | 5039  |
| 5256      | NM_01242466,NM_181504,NMNRK1   | MRK1          | RNA polymerase III subunit K        | -1.15118908   | -1.603995487 | 29.388369  | 25.534344  | 17.216656  | 4.81977956  | 3.97302418 | 926        | 1074  | 710   |       |
| 100505687 | NR_038301,NR_038302            | LINC00888     | phosphonucleic-3-kinase regula      | 1.42789159    | -1.60451592  | 1.029177   | 3.058177   | 1.120141   | 3.60451592  | 4.29892589 | 3.60451592 | 510   | 964   | 391   |
| 130162    | NM_001135598,NM_152385         | CLHC1         | long intergenic non-protein codin   | 1.052678185   | -1.604407386 | 3.4906     | 3.612629   | 2.018992   | 2.68948191  | 2.75234181 | 2.1362895  | 214   | 301   | 164   |
| 818       | NM_001204492,NM_001222,NMCA    | CK2G          | clathrin heavy chain linker domai   | 1.122632027   | -1.604518396 | 3.265261   | 3.671075   | 1.910719   | 4.17110273  | 4.32923711 | 3.53644652 | 668   | 1002  | 512   |
| 7733      | NM_001278508,NM_001278509      | ZNF180        | calcium/calmodulin dependent pr     | -1.745704399  | -1.604756191 | 34.327146  | 19.724755  | 20.21367   | 6.926067    | 6.13105355 | 6.25084936 | 4735  | 3624  | 3629  |
| 105377348 | NR_131185,NR_131186            | LOC105377348  | zinc finger protein 180             | -1.180763542  | -1.604869457 | 6.657479   | 5.553484   | 3.87462    | 4.84232994  | 4.61164745 | 4.18989199 | 1087  | 1230  | 833   |
| 10213     | NM_0013521783,NM_001321784     | FMSD14        | uncharacterized LOC105377348        | 1.4953091     | -1.605167458 | 1.930704   | 1.428872   | 0.525955   | 0.89986265  | 1.19532051 | 0.82147005 | 87    | 84    | 26    |
| 79954     | NM_005805                      | PSMD14        | family with sequence similarity 21  | -1.041305413  | -1.605362569 | 132.58679  | 101.050766 | 77.597397  | 7.79861309  | 7.79861309 | 7.79861309 | 3402  | 1236  | 6666  |
| 9440      | NM_001261392,NM_001261394      | NOL10         | nuclear protein 10                  | -1.08234256   | -1.605702454 | 17.793416  | 16.352931  | 10.317773  | 5.92735377  | 5.81514199 | 5.25839655 | 2350  | 2901  | 1800  |
| 59592     | NM_004268                      | MED17         | mediator complex subunit 17         | -1.094013295  | -1.60580557  | 11.657273  | 10.667874  | 6.236864   | 5.34729208  | 5.22080863 | 4.68520645 | 1559  | 1904  | 1194  |
| 2963      | NM_001282786,NM_002020         | PRTFDC1       | phosphoribosyl transferase dom      | 1.138197244   | -1.605824455 | 8.661131   | 5.033239   | 4.13181574 | 4.13181574  | 3.4972963  | 649        | 987   | 497   |       |
| 1515      | NM_003091,NM_198216            | SNRPB         | general transcription factor IIF su | -1.063954338  | -1.606089452 | 50.201023  | 31.206186  | 6.25683881 | 6.16990656  | 5.58446442 | 2963       | 3722  | 2269  |       |
| 6628      | NM_001021575,NM_001333         | CTSV          | cytochrome P450 family 2 subfar     | 1.041162429   | -1.60618032  | 0.4718198  | 0.856581   | 0.4718198  | 2.31185141  | 2.31185141 | 2.31185141 | 208   |       | 208   |
| 53340     | NM_003091,NM_198216            | SNRPB         | cathespin V                         | -2.7794707    | -1.606839003 | 66.358467  | 23.564625  | 38.458889  | 8.1769675   | 6.71007698 | 7.49575585 | 11323 | 5443  | 8667  |
| 11335     | NM_007276,NM_016587            | CBX3          | small nuclear ribonucleoprotein p   | 1.23434644    | -1.606858619 | 458.326706 | 565.129913 | 264.527069 | 8.9612334   | 9.26443262 | 8.27874088 | 19529 | 32208 | 14948 |
| 400916    | NM_001301335,NM_213720,NR      | CHCHD10       | sperm autoantigenic protein 17      | -2.179801377  | -1.607814776 | 23.851774  | 10.954595  | 13.951253  | 4.50955634  | 3.45802105 | 3.86234009 | 855   | 524   | 654   |
| 338758    | NM_007276,NM_016587            | CBX3          | chromobox 3                         | -1.22305478   | -1.608495585 | 164.959194 | 135.697914 | 97.34044   | 8.44818429  | 8.15861384 | 7.76497644 | 13673 | 14937 | 10455 |
| 6631      | NM_001301335,NM_213720,NR      | CHCHD10       | coiled-coil-helix-coiled-coil-hel   | -1.180426239  | -1.608682722 | 126.973876 | 106.490974 | 73.183584  | 6.40295487  | 6.16671138 | 5.72738578 | 3283  | 3716  | 2510  |
| 9331      | NM_001282795,NM_001282796      | ZNF7          | zinc finger protein 7               | -1.09879177   | -1.608894821 | 20.284216  | 18.361949  | 10.8084475 | 8.55551508  | 5.5228042  | 4.98858254 | 1940  | 2359  | 1441  |
| 54606     | NM_001330570,NM_004775         | BAGAL7        | small nuclear ribonucleoprotein p   | -1.310327039  | -1.609032621 | 81.908373  | 62.586669  | 47.857325  | 6.61574575  | 6.23036708 | 5.93843194 | 3861  | 4398  | 3886  |
| 4705      | NM_001330570,NM_004775         | BAGAL7        | beta-1,4-galactosyltransferase 6    | -8.710517363  | -1.609491253 | 2.856342   | 0.354133   | 1.798416   | 3.95117646  | 4.11062362 | 3.32012762 | 568   | 87    | 444   |
| 92014     | NM_001322019,NM_001322020      | NDUFA10       | DEAD-box helicase 56                | -1.193546855  | -1.60977546  | 33.894516  | 33.894516  | 33.894516  | 6.830837    | 6.58026881 | 6.15389757 | 4437  | 4967  | 3390  |
| 7405      | NM_001322019,NM_001322020      | NDUFA10       | NADH:ubiquinone oxidoreductase      | -1.104384201  | -1.610247833 | 19.142353  | 16.457054  | 11.232805  | 6.91788493  | 6.43696729 | 6.23784416 | 4708  | 4482  | 3596  |
| 63943     | NM_0033412,NR_024872,NR_02     | SLC25A51      | MAK16 homology                      | 1.7803999     | -1.610135216 | 7.893991   | 1.90135216 | 1.90135216 | 4.33130229  | 4.17538289 | 3.97582889 | 1079  | 1441  | 817   |
| 6242      | NM_001015055,NM_001015056      | RTKN          | solute carrier family 25 member 1   | -1.10110426   | -1.610247833 | 1.6253887  | 5.2206132  | 2.99661    | 3.5292011   | 3.6620841  | 2.91535666 | 612   | 316   | 316   |
| 124045    | NM_002110                      | FKBP1         | FK506 binding protein like          | 1.014318913   | -1.611155028 | 4.422848   | 4.492182   | 2.583201   | 2.76710656  | 2.78463118 | 2.20270591 | 228   | 309   | 174   |
| 200931    | NM_152672                      | SLC5A1        |                                     |               |              |            |            |            |             |            |            |       |       |       |

|           |                                         |                                   |                              |              |             |            |            |            |             |            |            |       |       |    |
|-----------|-----------------------------------------|-----------------------------------|------------------------------|--------------|-------------|------------|------------|------------|-------------|------------|------------|-------|-------|----|
| 10301     | NR_002605.NR_109973.NR_101DLEU1         | deleted in lymphocytic leukemia   | -1.163661406                 | -1.61656281  | 3.19552     | 2.711651   | 1.85319    | 3.31329794 | 3.11812251  | 2.70694712 | 351        | 403   | 267   |    |
| 3706      | NM_002220                               | ITPKA                             | -1.430170773                 | -1.616707968 | 1.708351    | 1.189434   | 0.984166   | 2.02927762 | 1.65726059  | 1.53866543 | 121        | 113   | 92    |    |
| 102723553 | NM_001313692                            | SMN1B                             | -1.87306857                  | -1.616521606 | 11.412624   | 11.103498  | 6.104968   | 3.41670749 | 2.6243808   | 2.80425801 | 271        | 280   | 271   |    |
| 6125      | NM_000869.NR_146333                     | RPL5                              | -1.00803633                  | -1.61714565  | 917.514685  | 950.652302 | 533.276887 | 9.61712337 | 9.80322101  | 9.23867099 | 37894      | 28621 | 28621 |    |
| 79675     | NM_001281476.NM_001322046.FASTK201      | FAST kinase domains 1             | 1.036132255                  | -1.617142596 | 8.522922    | 8.890908   | 4.994893   | 5.24441656 | 5.29430056  | 4.57420184 | 1449       | 2006  | 1102  |    |
| 101928595 | NR_135192                               | LOC101928595                      | uncharacterized LOC101928595 | -1.617408615 | 0.250816    | 0.402755   | 0.143935   | 0.79797761 | 1.12560759  | 0.54161868 | 29         | 62    | 22    |    |
| 122945    | NM_001113475                            | NOXRED1                           | -1.487608754                 | -1.617408615 | 0.395162    | 0.272884   | 0.234407   | 0.79797761 | 0.58077243  | 0.54161868 | 29         | 26    | 22    |    |
| 110541    | NM_172251                               | MRP5A4                            | -1.187943878                 | -1.617458143 | 55.867374   | 47.088088  | 32.468582  | 5.12523965 | 4.88449983  | 4.45662686 | 1331       | 1497  | 1012  |    |
| 78986     | NM_001243749.NM_001243751.C7orf49       | chromosome 7 open reading fran    | -1.6143855544                | -1.617556813 | 16.14385544 | 11.103498  | 6.104968   | 4.24471769 | 4.24471769  | 4.08952214 | 1018       | 942   | 774   |    |
| 27151     | NM_015692.NR_147452                     | CPAMD8                            | -1.08133065                  | -1.61705511  | 0.979188    | 0.295684   | 0.18076511 | 0.510306   | 0.89363891  | 0.510306   | 1.38636069 | 45    | 104   | 45 |
| 6431      | NM_006275.NR_034009                     | SRSF6                             | -1.18317786                  | -1.618317786 | 138.746201  | 157.761320 | 79.55699   | 9.01613268 | 9.19607095  | 8.3233557  | 20288      | 30715 | 15414 |    |
| 9994      | NM_00137667.NM_00137668.CASBPAP2        | caspace 8 associated protein 2    | -1.15336216                  | -1.61836383  | 8.054671    | 6.991189   | 4.704626   | 5.75639134 | 5.55459241  | 5.07821843 | 2083       | 2413  | 1583  |    |
| 4671      | NM_001346870.NM_004536.NMNAIP           | NLR family apoptosis inhibitory p | -1.160140051                 | -1.618403695 | 3.424697    | 3.976953   | 1.987682   | 4.51438809 | 3.85822657  | 3.58522657 | 858        | 1330  | 652   |    |
| 285193    | NM_001033575                            | DUSP28                            | -1.030013267                 | -1.619011968 | 3.555355    | 3.461057   | 2.066088   | 2.6780437  | 2.64211237  | 2.11756522 | 1212       | 275   | 161   |    |
| 64118     | NM_002155                               | DUS1L                             | -1.199603303                 | -1.619187943 | 128.491934  | 74.5723037 | 7.86861936 | 7.62547481 | 7.19540392  | 6.95340392 | 10253      | 10306 | 7029  |    |
| 51042     | NM_015971                               | ZNF593                            | -1.236402069                 | -1.619086079 | 53.480002   | 43.286152  | 31.023204  | 5.12102205 | 4.82461482  | 4.45120991 | 2327       | 1434  | 1008  |    |
| 280636    | NM_001321335.NM_170746                  | SELENOH                           | -1.024464602                 | -1.619111087 | 29.375583   | 28.727531  | 17.04575   | 5.39610359 | 5.36209608  | 4.72198917 | 1614       | 2105  | 1226  |    |
| 23387     | NM_001281748.NM_001281749.SIK3          | SIK family kinase 3               | -1.587074638                 | -1.619322221 | 3.916125    | 2.488727   | 2.284417   | 4.61528873 | 3.98297572  | 3.95579862 | 923        | 777   | 701   |    |
| 151393    | NM_001170791.NM_001170792.RMN2          | regulator of microbule dynamic    | 1.266756224                  | -1.619712753 | 2.319648    | 2.915286   | 1.312362   | 2.38631541 | 2.66830768  | 1.85174813 | 166        | 281   | 126   |    |
| 100129075 | NR_027123                               | KTNI-AS1                          | 1.238494691                  | -1.619983053 | 1.952977    | 1.9622     | 0.896614   | 1.6852613  | 1.90501868  | 1.24294651 | 87         | 144   | 66    |    |
| 253489    | NM_001164144.NM_001164145.CHAMP1        | chromosome alignment maintain     | 2.68978967                   | -1.62029242  | 4.863852    | 1.802232   | 2.822109   | 4.30911424 | 2.99933041  | 3.85740237 | 739        | 367   | 561   |    |
| 728       | NM_0011736                              | CSAR1                             | 1.073536896                  | -1.620037395 | 13.453268   | 14.455257  | 7.797876   | 4.98491804 | 5.08417426  | 4.31674724 | 1204       | 1727  | 914   |    |
| 65095     | NM_023008                               | KRI1                              | 1.10910816                   | -1.620340608 | 37.281291   | 41.395554  | 21.619242  | 6.78257573 | 6.93068704  | 6.09436188 | 4283       | 6347  | 3251  |    |
| 85302     | NM_001319193                            | FBF1                              | -1.023403226                 | -1.620387288 | 15.029341   | 12.488271  | 8.716493   | 6.11877104 | 5.85417577  | 5.4352184  | 2689       | 2982  | 2041  |    |
| 401264    | NR_103446.NR_103447                     | TRAM2-AS1                         | 1.005853772                  | -1.621967045 | 1.60355     | 1.611023   | 1.052474   | 2.32162912 | 2.32837375  | 1.79206867 | 157        | 211   | 119   |    |
| 9016      | NM_001282195.NM_001282196.SLC25A14      | solute carrier family 25 member 1 | 1.112180483                  | -1.622244179 | 8.138877    | 8.893398   | 4.489105   | 3.75924973 | 3.72044785  | 2.95442604 | 430        | 430   | 326   |    |
| 80833     | NM_014349.NM_030644.NM_141APL3          | apoliipoprotein L3                | 1.133125378                  | -1.6210233   | 1.410233    | 1.410233   | 5.87070407 | 5.87070407 | 5.18014935  | 4.58014935 | 2258       | 3645  | 1712  |    |
| 55066     | NM_001322117.NM_001322118.PDPR          | pyruvate dehydrogenase phosph     | 1.118556681                  | -1.622148092 | 11.631482   | 13.077439  | 7.648229   | 6.68342755 | 6.600414397 | 6.00414397 | 6014       | 3051  | 3051  |    |
| 100529241 | NM_001202485                            | HSPE1-MOB4                        | -1.350277224                 | -1.622698783 | 5.225551    | 3.871835   | 3.026715   | 4.50955634 | 4.09825806  | 3.84969236 | 855        | 846   | 648   |    |
| 440574    | NM_001032363.NM_001204082.MINOS1        | mitochondrial inner membrane or   | -1.097891783                 | -1.622761324 | 20.180261   | 18.450437  | 11.697575  | 6.23016423 | 6.09730668  | 5.54359837 | 2908       | 3539  | 2204  |    |
| 440894    | NR_046110.NR_046110_dup1.NLINC001123    | long intergenic non-protein codin | 1.163140349                  | -1.622798304 | 7.378394    | 9.537264   | 4.23884171 | 4.44613902 | 4.38704707  | 3.58704707 | 702        | 1001  | 532   |    |
| 5138      | NM_001199461.NM_001199462.PDCD2         | programmed cell death 2           | -1.004749537                 | -1.622969937 | 19.411949   | 20.8063    | 12.60578   | 5.47009282 | 5.44631106  | 4.79157102 | 701        | 2262  | 1289  |    |
| 102484835 | NM_001146695.NM_001146698.C4orf13       | lysine demethylase 4C             | 1.44653843                   | -1.62578113  | 1.465788    | 1.8601413  | 4.9817352  | 3.9817352  | 3.9817352   | 3.9817352  | 1120       | 581   | 1120  |    |
| 441094    | NR_106735                               | MIR6087                           | 1.22247074                   | -1.623913423 | 21.731461   | 26.647745  | 12.310412  | 1.03161781 | 1.18729361  | 0.71544405 | 141        | 67    | 31    |    |
| 1723      | NR_021490.NR_021491.NR_021492.NR2F1-AS1 | NR2F1 antisense RNA 1             | -1.05133486                  | -1.624079159 | 1.254841    | 1.21253    | 0.730391   | 2.22275497 | 2.16626946  | 1.70368302 | 144        | 109   | 109   |    |
| 7295      | NM_001361                               | DHOHD                             | -1.070125752                 | -1.6241343   | 3.922624    | 8.71968    | 5.390284   | 4.43219317 | 4.52559963  | 3.86439381 | 865        | 1080  | 655   |    |
| 84709     | NM_001244938.NM_003329                  | TXN                               | -1.299147315                 | -1.624452343 | 708.66833   | 546.223744 | 409.847656 | 9.22821584 | 8.55136827  | 8.52975947 | 23507      | 24176 | 17798 |    |
| 100494984 | NR_036526                               | LOC100494984                      | -1.207854625                 | -1.62495101  | 2.695107    | 2.47805429 | 1.71819    | 4.53686701 | 4.12972146  | 3.82972146 | 1063       | 1165  | 797   |    |
| 7571      | NM_001304492.NM_001304493.ZNF23         | SUGT1-130000209RICK_pseudot       | 1.000497588                  | -1.62528282  | 1.561448    | 1.569333   | 0.902887   | 2.56403048 | 2.56520021  | 2.00847212 | 193        | 258   | 146   |    |
| 100616345 | NR_036624.chr1.NR_036624.cMIR4426       | zinc finger protein 23            | -1.264499712                 | -1.625317697 | 11.937809   | 9.757814   | 6.798911   | 5.09974705 | 4.77223569  | 4.42502316 | 1307       | 1381  | 989   |    |
| 84709     | NM_003263                               | MGARP                             | 1.213351997                  | -1.62553791  | 3.296062    | 4.082053   | 1.78608    | 0.26755841 | 0.31941552  | 0.16897038 | 8          | 13    | 6     |    |
| 90625     | NM_001308491                            | ERVH48-1                          | 1.397980792                  | -1.62553791  | 0.156111    | 0.212701   | 0.077151   | 0.26755841 | 0.36283659  | 0.16897038 | 8          | 15    | 6     |    |
| 64985     | NR_030360                               | MIH321                            | -2.814531255                 | -1.62553791  | 0.087769    | 0.033925   | 0.052193   | 0.26755841 | 0.10601836  | 0.16897038 | 8          | 4     | 6     |    |
| 100126332 | NR_030641                               | MIR943                            | 1.076330624                  | -1.62553791  | 1.094395    | 1.094395   | 1.259751   | 0.26755841 | 0.15642221  | 0.16897038 | 8          | 6     | 6     |    |
| 5790      | NM_005608                               | PTPRCAP                           | -2.055197087                 | -1.625577129 | 5.653659    | 2.760067   | 3.272301   | 2.58923814 | 1.78245981  | 2.03057861 | 197        | 128   | 149   |    |
| 57621     | NM_020861                               | ZBTB2                             | 1.100595272                  | -1.626013059 | 10.128068   | 11.158875  | 5.853469   | 5.04403172 | 5.17832427  | 4.36973462 | 1256       | 1847  | 950   |    |
| 9352      | NM_000786.NR_024546                     | TXN1L                             | -1.063722475                 | -1.626060691 | 7.838812    | 7.660694   | 5.426908   | 5.52539208 | 4.43433385  | 4.1769     | 2222       | 2222  | 1338  |    |
| 1006      | NM_001350246.NM_001350247.C6orf133      | thioredoxin like 1                | 1.1580706                    | -1.626335348 | 7.742467    | 58.513015  | 39.185378  | 6.47039405 | 6.26404576  | 5.7894005  | 3442       | 3669  | 2603  |    |
| 4731      | NM_00101503.NM_0021075                  | NDUFB5                            | -1.162661139                 | -1.62661139  | 11.454938   | 14.201117  | 11.454938  | 4.73974945 | 4.73974945  | 4.39455474 | 1476       | 1671  | 1176  |    |
| 123207    | NM_001160113.NM_00160114.C5orf40        | NADH:ubiquinone oxidoreductase    | -1.166059629                 | -1.626775666 | 32.328293   | 27.420681  | 19.437907  | 5.47009282 | 5.25378786  | 4.78827692 | 1701       | 1949  | 1286  |    |
| 54908     | NM_001329639.NM_001329640.SPDL1         | chromosome 15 open reading frs    | -1.000498504                 | -1.626902993 | 8.122691    | 7.942137   | 4.899825   | 3.70009475 | 3.69943092  | 3.06566078 | 471        | 629   | 356   |    |
| 341346    | NM_0011455010                           | SMCO2                             | 1.172864169                  | -1.627137237 | 32.911685   | 38.081711  | 17.943506  | 6.66944032 | 6.89739149  | 5.97594053 | 3957       | 6201  | 2991  |    |
| 22323     | NM_001145714.NM_001284337.RRP12         | single-pass membrane protein w    | -2.239811709                 | -1.627147052 | 1.921695    | 0.848999   | 1.10506    | 1.04792463 | 1.76310734  | 1.30472178 | 94         | 56    | 54    |    |
| 64118     | NM_001163508.NM_001163509.DCAF4         | ribosomal RNA processing 12 ho    | -1.220273399                 | -1.62725852  | 16.30811    | 13.360533  | 9.419449   | 6.15583539 | 5.97306902  | 5.45659919 | 2760       | 3022  | 2086  |    |
| 9816      | NM_001314021.NM_0014777                 | URB2                              | 1.132905108                  | -1.627794006 | 5.034249    | 5.034249   | 5.705707   | 4.83848193 | 5.01270852  | 4.6678956  | 1084       | 1641  | 819   |    |
| 9146      | NM_004712                               | HGS                               | -1.271335336                 | -1.628510928 | 124.543106  | 98.070854  | 71.867599  | 8.4974156  | 8.15215081  | 7.79639192 | 14149      | 14870 | 10686 |    |
| 144406    | NM_001178003.NM_144668                  | WDR66                             | 1.591548694                  | -1.628898774 | 0.764764    | 1.298488   | 0.440222   | 1.92669094 | 2.4491251   | 1.4340085  | 110        | 234   | 83    |    |
| 126792    | NM_080605                               | B3GALT6                           | 1.222259091                  | -1.629205901 | 11.499846   | 13.957865  | 6.63048    | 5.10529255 | 5.28233643  | 4.33810682 | 1228       | 1989  | 927   |    |
| 677796    | NR_020291                               | SNORD5C                           | -1.18338594                  | -1.630278135 | 24.253326   | 18.139534  | 12.702801  | 6.45894451 | 6.27753777  | 5.30448591 | 2467       | 4017  | 1860  |    |
| 197259    | NM_001142497.NM_152649                  | MLKL                              | 1.164732413                  | -1.63077498  | 16.180071   | 12.145609  | 9.139337   | 5.43908863 | 5.00540544  | 4.73436273 | 1674       | 1704  | 1255  |    |
| 51112     | NM_001321102.NM_0016030                 | TRAPPC12                          | 1.009076562                  | -1.63077147  | 17.998965   | 19.6854    | 10.390223  | 5.49963272 | 5.62259854  | 4.81399624 | 1737       | 2532  | 1310  |    |
| 54059     | NM_001006114.NM_001314022.YBEY          | cyclic dependent kinase 4         | 1.093832944                  | -1.631054508 | 49.887939   | 54.629715  | 28.736898  | 6.61836627 | 6.74650192  | 5.92177183 | 3818       | 5580  | 2879  |    |
| 54149     | NM_001006114.NM_001314022.YBEY          | ybeY metalloproteinase (putative) | -1.131508174                 | -1.631108285 | 8.055603    | 7.026537   | 4.328097   | 2.93026199 | 2.77662633  | 2.33889515 | 260        | 307   | 196   |    |
| 707796    | NR_020291                               | SNORD5C                           | -1.18338594                  | -1.631178836 | 15.30279    | 10.587713  | 8.96439    | 4.65082999 | 4.10146599  | 3.88031446 | 947        | 848   | 714   |    |
| 64985     | NM_182640                               | MRP59                             | -1.26861443                  | -1.631270602 | 44.253326   | 53.999432  | 25.49      |            |             |            |            |       |       |    |

|           |                                     |                  |                                        |               |              |            |            |            |            |            |            |       |      |       |
|-----------|-------------------------------------|------------------|----------------------------------------|---------------|--------------|------------|------------|------------|------------|------------|------------|-------|------|-------|
| 9446      | NM_001191002.NM_001191003           | GSTO1            | glutathione S-transferase omega        | -2.076975923  | -1.639798983 | 151.123817 | 72.779783  | 86.536236  | 7.21385509 | 6.16977081 | 6.5065228  | 5789  | 3724 | 4342  |
| 29094     | NM_014181                           | LGALS3           | galectin like                          | -1.2954456    | -1.639801908 | 7.189144   | 5.555314   | 4.120785   | 4.79679491 | 4.43854891 | 4.11602033 | 1082  |      | 789   |
| 150726    | NM_001080410                        | FBXO41           | F-box protein 41                       | 2.51001702    | -1.64028125  | 4.843261   | 12.174522  | 2.775481   | 5.03739588 | 4.38697325 | 4.38697325 | 1283  |      | 962   |
| 158427    | NM_1139249                          | TSTD2            | thiosulfate sulfoxyltransferase like x | -1.09864958   | -1.64032122  | 11.777847  | 10.732553  | 6.748196   | 5.69458464 | 4.99821421 | 4.99821421 | 1094  |      | 1408  |
| 26511     | NM_012110                           | CHIC2            | cysteine rich hydrophobic domain       | 1.14162829    | -1.641368565 | 6.70891    | 7.660917   | 3.840191   | 3.09898317 | 3.25990797 | 2.47942639 | 295   |      | 221   |
| 92659     | NR_015454                           | MAFG-AS1         | MAFG antisense RNA 1 (head to          | -1.025937851  | -1.641910406 | 2.966389   | 2.891263   | 1.697167   | 2.69516719 | 2.66397469 | 2.11576522 | 215   |      | 280   |
| 9875      | NM_018425                           | URB1             | URB1 ribosome biogenesis 1 hor         | 1.015972503   | -1.642348633 | 4.778293   | 4.481053   | 2.734432   | 5.68103985 | 5.70346404 | 4.98317903 | 2975  |      | 2681  |
| 9792      | NM_014755                           | SERTAD2          | SERTA domain containing 2              | -1.015370093  | -1.643300007 | 12.797756  | 12.642818  | 7.717939   | 6.13244566 | 6.11328694 | 5.4289903  | 1715  |      | 3579  |
| 30378     | NM_0202113                          | CFHR1            | complement factor H related 1          | -1.07365938   | -1.64352301  | 2.385094   | 1.421324   | 1.265311   | 1.49107972 | 1.50747923 | 1.129456   | 95    |      | 86    |
| 29689     | NM_001323623.NM_001323624           | GNL2             | G protein nuclear 2                    | -1.053974219  | -1.643671373 | 69.08969   | 63.738742  | 39.520393  | 7.23850373 | 7.23850373 | 6.85428254 | 6384  |      | 7869  |
| 54851     | NM_017704                           | ANKRD49          | ankyrin repeat domain 49               | -1.637633978  | -1.643780895 | 15.429994  | 9.430436   | 8.814554   | 4.8896361  | 4.20798559 | 4.20292915 | 1124  |      | 917   |
| 27202     | NM_001348076.NM_001348077           | DIMT1            | DIM1 dimethyladenosine transfer        | -1.786719157  | -1.643754012 | 29.092003  | 16.45585   | 15.48073   | 5.8669311  | 5.04883836 | 5.16571834 | 2252  |      | 1685  |
| 516       | NM_001002027.NM_0005175             | ATP5G1           | ATP synthase, H+ transporting, r       | -1.214192419  | -1.643853749 | 173.53403  | 143.124453 | 99.572836  | 6.63546944 | 5.92767386 | 6.63546944 | 3864  |      | 2891  |
| 130497    | NM_145260                           | OSR1             | odd-skipped related transcription i    | 1.362530141   | -1.644436506 | 1.308378   | 1.784797   | 0.748878   | 1.77789308 | 2.10365798 | 1.30472178 | 95    |      | 173   |
| 91419     | NM_001320408.NM_001320409           | ATP23            | ATP23 metalloproteinase and ATI        | -1.599357176  | -1.644653204 | 10.157475  | 1.308986   | 5.990355   | 3.9604168  | 3.24827687 | 3.20501651 | 531   |      | 446   |
| 5250      | NM_0020535.NM_00588.NM_001320543    | SLC22A3          | solute carrier family 25 member : 3    | -1.286475046  | -1.645466922 | 343.849005 | 286.493872 | 191.918103 | 9.13958555 | 8.77682698 | 8.42273144 | 22104 |      | 761   |
| 55705     | NM_018085                           | IPO9             | importin 9                             | 1.029803026   | -1.646207236 | 19.736092  | 20.347713  | 11.266315  | 7.78386686 | 7.82604632 | 7.06893294 | 8613  |      | 11851 |
| 1329      | NM_001862                           | COX5B            | cytochrome c oxidase subunit 5B        | -1.13390057   | -1.646520645 | 364.809601 | 322.116425 | 208.207306 | 7.49499965 | 7.31476549 | 6.78072565 | 7043  |      | 8299  |
| 642846    | NR_024374                           | LOC642846        | DEAD/H (Asp-Glu-Ala-Asp(His)) t        | -1.338457497  | -1.646625705 | 16.983276  | 12.702566  | 9.694073   | 5.87946948 | 5.46714626 | 5.17567208 | 2272  |      | 2268  |
| 55960     | NM_001012320.NM_001289181           | ZNF302           | zinc finger protein 302                | -1.271115953  | -1.646683671 | 15.607032  | 12.316283  | 8.618058   | 5.38735072 | 5.05054456 | 4.68994427 | 1606  |      | 1198  |
| 100534595 | NR_037946                           | HNRNPUL2-B-BSCL2 | HNRNPUL2-BSCL2 readthrough             | 1.051783367   | -1.646794855 | 6.120747   | 6.446335   | 3.494065   | 4.64055392 | 4.71034878 | 3.95772276 | 940   |      | 102   |
| 3628      | NM_001128928.NM_002194              | INPP1            | inositol polyphosphate-1-phosph        | 1.452346602   | -1.64690389  | 15.02701   | 21.239657  | 8.503011   | 4.93413697 | 5.45779006 | 4.24450423 | 1161  |      | 2253  |
| 201973    | NM_001300767.NM_001300768           | PRIMPOL          | primase and DNA directed polym         | 1.155905233   | -1.64712503  | 9.400685   | 10.989912  | 5.70035    | 4.45363476 | 4.65377434 | 3.77556686 | 821   |      | 1268  |
| 84262     | NM_001134340.NM_003230              | PSMG3            | proteasome assembly chaperone          | -1.476767806  | -1.647172816 | 50.817378  | 32.725611  | 29.916081  | 5.95959731 | 5.40813487 | 5.25448848 | 2404  |      | 1795  |
| 57464     | NM_001134336.NM_020704              | STRIP2           | straitin interacting protein 2         | -1.342308955  | -1.647414836 | 3.651658   | 2.606566   | 1.66573    | 4.11918371 | 3.7225328  | 3.54160249 | 6403  |      | 640   |
| 6119      | NM_002947                           | RP43             | replication protein A3                 | -1.39896203   | -1.647999623 | 38.059422  | 27.243702  | 21.702264  | 6.21342436 | 5.90530231 | 5.50530231 | 2874  |      | 2145  |
| 100506302 | NR_128344                           | LOC10506302      | uncharacterized LOC10506302            | 1.551658154   | -1.648213952 | 1.219864   | 2.198942   | 1.265869   | 1.52971203 | 1.4968262  | 1.4968262  | 918   |      | 95    |
| 79848     | NM_0010291339.NM_024790             | CSP1             | centrosome and spindle pole as         | -1.052676209  | -1.648602159 | 7.986107   | 7.590662   | 5.126817   | 5.16458753 | 4.53936458 | 4.53936458 | 1841  |      | 1075  |
| 58190     | NM_001206878.NM_001198.NM.CDTS      | P1               | CTD small phosphatase 1                | 1.097316546   | -1.649260268 | 36.180956  | 39.614177  | 20.572264  | 6.54785089 | 6.68046623 | 5.83598022 | 3634  |      | 5328  |
| 641638    | NR_002599                           | SNHG6            | small nuclear RNA host gene 6          | -1.88200434   | -1.649333257 | 199.852722 | 106.307297 | 113.869827 | 6.5368116  | 5.82495435 | 5.82495435 | 3606  |      | 2689  |
| 100507217 | NR_037600.NR_037601.NR_031LINC01578 |                  | long intergenic non-protein codin      | -1.280366058  | -1.649585005 | 33.955763  | 27.25322   | 19.977074  | 5.83702974 | 5.4875188  | 5.3118205  | 2205  |      | 2301  |
| 131118    | NM_001190233.NM_145261.NM.DNAJC19   |                  | DnaJ heat shock protein family (I      | 1.035164781   | -1.64969846  | 33.569096  | 18.25289   | 15.5862818 | 5.54047187 | 4.83822099 | 4.788      | 2473  |      | 1333  |
| 603       | NM_003119.NM_199367                 | SPT7             | SPT7, paraplegin matrix A-4 pe         | -1.066071454  | -1.649700621 | 85.067002  | 81.067002  | 4.46694849 | 7.97520049 | 7.09770832 | 6.09770832 | 10409 |      | 13146 |
| 5893      | NM_001297419.NM_001297420           | RAD52            | RAD52 homolog, DNA repair pro          | -1.67208863   | -1.649913642 | 10.551118  | 6.794355   | 6.873738   | 4.91233736 | 4.20202068 | 4.22066504 | 1143  |      | 913   |
| 158234    | NM_001286950.NM_001286951           | TRMT10B          | RNA methyltransferase 10B              | -1.24597521   | -1.64991513  | 3.078455   | 2.442346   | 1.72013    | 2.94465259 | 2.67262769 | 2.33859515 | 282   |      | 196   |
| 100874069 | NR_046542                           | STK24-AS1        | STK24 antisense RNA 1                  | -1.196358024  | -1.65024999  | 0.708191   | 0.586873   | 0.402791   | 1.06712766 | 0.93737891 | 0.73352601 | 43    |      | 32    |
| 134359    | NM_001099271.NM_152408              | POC5             | POC5 centriolar protein                | -1.001003429  | -1.650155468 | 16.184605  | 16.148526  | 9.185534   | 5.12523965 | 5.12257466 | 4.42918965 | 1331  |      | 992   |
| 84981     | NM_00114467527.NM_003795            | RNA1             | RNA pseudovirulysin synthase d         | -2.175647052  | -1.650489762 | 18.428493  | 16.428493  | 8.650476   | 4.43476943 | 4.81791943 | 4.81791943 | 1762  |      | 1133  |
| 157285    | NM_001080626                        | PRAG1            | PEAK1 related kinase activating        | 1.759214276   | -1.650795733 | 8.35724    | 7.141824   | 4.75569    | 5.29863957 | 6.09770832 | 4.59907035 | 1506  |      | 3540  |
| 4902      | NM_004558                           | NRTN             | neurturin                              | -1.445695671  | -1.650955747 | 0.913469   | 0.618976   | 0.513407   | 0.99521185 | 0.75384785 | 0.6785857  | 36    |      | 29    |
| 643201    | NR_036494                           | LOC643201        | centrosomal protein 192kDa pse         | 2.395005071   | -1.650955747 | 0.2331     | 0.588447   | 0.131981   | 0.99521185 | 1.75827411 | 0.6785857  | 39    |      | 125   |
| 729737    | NR_039983                           | LOC729737        | uncharacterized LOC729737              | -1.028586836  | -1.651257348 | 47.253555  | 45.980942  | 26.892111  | 7.98218541 | 7.94130484 | 7.26232085 | 9888  |      | 12841 |
| 76587     | NM_002433                           | CARS2            | cysteinyl-RNA synthetase D2, mlt       | 1.285101384   | -1.651902676 | 17.475405  | 22.493784  | 9.943965   | 5.06613802 | 4.51848602 | 4.36973436 | 1276  |      | 2191  |
| 100867750 | NR_002816.NR_051963.NR_001320543    | PSIP5            | ribosomal protein L32 pseudogen        | 1.061087533   | -1.651951196 | 1.433414   | 1.915      | 3.641564   | 3.40982653 | 2.69776536 | 2.69776536 | 369   |      | 565   |
| 132241    | NM_003137                           | RPL32P3          | ribosomal protein L32 pseudogen        | 1.368396091   | -1.652000441 | 3.883407   | 5.322186   | 2.203108   | 3.1406272  | 3.55714683 | 3.25885524 | 320   |      | 565   |
| 400892    | NR_037566                           | BCRP2            | breakpoint cluster region pseudo       | -1.26283824   | -1.652223106 | 0.391331   | 0.30428    | 0.215754   | 0.91952222 | 0.77006602 | 0.62147005 | 35    |      | 37    |
| 26985     | NM_001320263.NM_001320264           | AP3M1            | adaptor related protein complex :      | -1.330517042  | -1.652374885 | 8.370553   | 6.281329   | 4.770723   | 5.44416182 | 4.74101761 | 4.50430532 | 1670  |      | 1677  |
| 118881    | NM_144589                           | COMTD1           | catechol-O-methyltransferase do        | -2.03429936   | -1.652453827 | 22.129555  | 22.129555  | 12.569012  | 4.46032739 | 3.50228808 | 3.77773686 | 825   |      | 542   |
| 6100      | NM_203289                           | RP9              | retinitis pigmentosa 9 (autosom        | -1.442577095  | -1.652600728 | 12.963423  | 9.89696    | 3.763925   | 3.9169564  | 3.42377448 | 3.2559454  | 555   |      | 914   |
| 3176      | NM_0151377.NR_045770                | PXA8-AS1         | PXA8 antisense RNA 1                   | 1.016305136   | -1.65318447  | 1.25140    | 1.048007   | 1.5285023  | 1.94837076 | 1.96635651 | 1.96635651 | 74    |      | 150   |
| 65083     | NM_0022917.NM_139235                | NOL6             | nuclear protein 6                      | 1.05555448    | -1.653363494 | 10.050155  | 10.509146  | 5.619869   | 5.57711104 | 5.65352499 | 4.87128234 | 1835  |      | 2588  |
| 10678082  | NR_133662                           | KCNK4-TEX40      | KCNK4-TEX40 readthrough                | -1.877017848  | -1.653819109 | 0.292668   | 0.154238   | 0.164521   | 0.83964067 | 0.50527715 | 0.6785857  | 31    |      | 22    |
| 5692      | NM_002796                           | PSMB4            | proteasome subunit beta 4              | -1.79976771   | -1.653835331 | 330.122986 | 258.199402 | 187.572174 | 8.22073471 | 7.86509649 | 7.49807129 | 11673 |      | 12185 |
| 126014    | NM_0011282349.NM_001282350          | OSCAR            | osteoclast associated, immunogl        | -1.557480894  | -1.653948041 | 0.884087   | 0.564058   | 0.497961   | 1.47662927 | 1.05442063 | 1.05442063 | 70    |      | 52    |
| 404560    | NM_206967                           | C16orf74         | chromosome 16p open reading fr         | -1.232910086  | -1.654022458 | 65.841095  | 53.451447  | 37.413307  | 5.87074007 | 5.57435204 | 5.1607156  | 2258  |      | 2447  |
| 3176      | NM_001024074.NM_001024075           | HNMT             | histamine N-methyltransferase          | 1.009195859   | -1.654490011 | 12.091038  | 11.443476  | 8.829407   | 5.82340611 | 5.76468078 | 5.63460718 | 818   |      | 1103  |
| 6672      | NM_001080391.NM_001206701           | SP100            | SP100 nuclear antigen                  | -1.2204589204 | -1.654725307 | 12.228104  | 10.235236  | 7.02788    | 5.6267075  | 5.11661607 | 4.51166107 | 2189  |      | 2428  |
| 54733     | NM_0017515                          | SLC35F2          | SP100 nuclear antigen                  | 1.06277892    | -1.655018996 | 41.802089  | 44.922404  | 28.951462  | 6.72676984 | 6.13830871 | 6.0087914  | 4119  |      | 5849  |
| 79072     | NM_004091.NR_036553.NR_07FASTK03    |                  | solute carrier family 35 member I      | -1.185327488  | -1.655380023 | 32.176323  | 18.266068  | 27.172155  | 6.64834823 | 6.40571814 | 5.93061585 | 3899  |      | 2061  |
| 91675     | NM_001160210.NM_001330208           | USP47            | FAST kinase domains 3                  | -1.283700928  | -1.655335553 | 9.342725   | 4.617224   | 4.686907   | 3.94164205 | 3.60776556 | 3.27458965 | 564   |      | 587   |
| 29005     | NM_001286577.NM_015531              | C2CD3            | calcium dependent domain c             | 1.007954549   | -1.655416349 | 9.281303   | 7.3944038  | 4.68917    | 4.52199432 | 4.26309143 | 4.1500879  | 1416  |      | 1907  |
| 54876     | NM_001345880.NM_001345881           | DCAF16           | DDB1 and CUL4 associated fact          | -1.080473945  | -1.655492162 | 20.986552  | 19.189257  | 12.219129  | 6.41979203 | 6.30947948 | 5.70350414 | 3322  |      | 4108  |
| 5938      | NM_178238                           | PILRB            | paired immunoglobulin-like type 1      | -2.353373882  | -1.655494895 | 98.435318  | 41.869625  | 55.866074  | 7.11711491 | 5.89634288 | 6.39629202 | 5411  |      | 4020  |
| 50331     | NM_001248002.NM_001248003           | ARNTL2           | aryl hydrocarbon receptor nuclea       | -2.03166792   | -1.          |            |            |            |            |            |            |       |      |       |

|           |                               |              |                                   |              |              |            |            |            |            |             |            |       |       |      |
|-----------|-------------------------------|--------------|-----------------------------------|--------------|--------------|------------|------------|------------|------------|-------------|------------|-------|-------|------|
| 64753     | NM_001201372.NM_022742        | CCDC136      | coiled-coil domain containing 136 | 1.012072811  | -1.663735136 | 0.543433   | 0.596097   | 0.305822   | 1.69664266 | 1.70865125  | 1.23026757 | 88    | 119   | 65   |
| 23594     | NM_014321.NR_037620           | ORC6         | origin recognition complex subun  | -1.13721152  | -1.86376795  | 55.547641  | 48.85373   | 31.342183  | 6.4774274  | 6.29414062  | 5.75364996 | 4459  | 4064  | 2557 |
| 10482     | NM_001081491.NM_006382        | NXF1         | nuclear RNA export factor 1       | 1.19204181   | -1.664270681 | 34.068921  | 45.888192  | 21.301788  | 6.1067188  | 6.1067188   | 6.08426934 | 3468  | 6957  | 3228 |
| 25504     | NM_001256741.NM_001256742     | CNOCT10      | CCR4-NOT transcription complex    | 1.08358653   | -1.6644552   | 9.751238   | 10.524552  | 5.493388   | 4.7830351  | 4.89562996  | 4.38287876 | 102   | 1509  | 770  |
| 79903     | NM_001083600.NM_001083601     | NAAG60       | N[alpha]-acetyltransferase 60, N  | -1.077802837 | -1.664574539 | 24.138259  | 26.125594  | 13.717812  | 5.99805187 | 6.10451925  | 5.2777797  | 2470  | 3557  | 1825 |
| 399979    | NM_001301089.NM_001347918     | SNX19        | sorting nexin 19                  | -1.675629493 | -1.664629223 | 17.213009  | 10.428652  | 9.68011    | 6.64100301 | 5.90600704  | 5.91535059 | 3879  | 3093  | 2866 |
| 140462    | NM_001031739.NM_001168530     | ASB9         | ankyrin repeat and SOCS box on    | -1.623900094 | -1.664701533 | 1.600588   | 0.981267   | 0.860737   | 1.89739865 | 1.42003184  | 1.39836968 | 107   | 88    | 79   |
| 79783     | NM_001193311.NM_001193312     | SUGT         | succinyl-CoA:glutamate-CoA trans  | -3.861633004 | -1.665027288 | 0.96719    | 0.252422   | 0.511018   | 1.35261029 | 0.48576948  | 0.95030448 | 161   | 21    | 45   |
| 95878     | NM_014660.NR_033435.NR_033436 | PHF14        | PHD finger protein 14             | -1.446626831 | -1.665726574 | 1.025482   | 6.518083   | 4.946951   | 4.81784845 | 4.82109129  | 4.81784845 | 1544  | 1427  | 119  |
| 2766      | NM_0058677                    | GMPT7        | guanosine monophosphate reduct    | -2.659754187 | -1.665918506 | 0.65619    | 0.369159   | 0.376026   | 0.44550456 | 0.44550456  | 0.65977727 | 38    | 177   | 26   |
| 503637    | NR_122113                     | DUXPAB       | double homeobox A pseudogene      | -1.337744086 | -1.666735047 | 1.221748   | 1.641267   | 0.690849   | 1.81624371 | 2.12902957  | 1.32870978 | 38    | 177   | 79   |
| 25855     | NM_001024957.NM_015399        | BRMS1        | breast cancer metastasis suppress | 1.356487036  | -1.667215579 | 30.782044  | 41.864504  | 17.326997  | 5.45676729 | 5.88800748  | 4.74101761 | 1685  | 3054  | 1243 |
| 220869    | NM_001024916.NM_001286835     | CBWD5        | COBW domain containing 5          | -1.304241436 | -1.667571392 | 20.979137  | 24.030215  | 17.831539  | 5.92554116 | 5.20350701  | 5.20350701 | 2347  | 2404  | 1731 |
| 23315     | NM_001260491.NM_015266        | NR_SLC9A8    | solute carrier family 9 member A1 | -1.383189199 | -1.667790645 | 12.467129  | 9.001617   | 7.03075    | 6.25875968 | 5.79794319  | 5.53331305 | 2967  | 2866  | 2188 |
| 10203     | NM_001271751.NM_005795        | CALCRL       | calcitonin receptor like receptor | 1.299875     | -1.667862272 | 0.402232   | 1.77369398 | 0.224269   | 2.05153568 | 1.29257653  | 1.29257653 | 95    | 105   | 70   |
| 22630     | NM_174988                     | LYGI         | lysocyme g1                       | -1.136555399 | -1.668101183 | 2.668140   | 1.679862   | 1.679862   | 1.96484452 | 1.82964782  | 1.43305699 | 114   | 134   | 84   |
| 84817     | NM_032731                     | TXNDC17      | thioredoxin domain containing 17  | -1.117867949 | -1.668502967 | 19.564293  | 17.52314   | 11.017796  | 5.34069585 | 5.18438775  | 4.62593952 | 1552  | 1855  | 1144 |
| 138162    | NM_001048265.NM_144654        | C3orf116     | chromosome 9 open reading fram    | 1.12541488   | -1.668727436 | 9.641667   | 10.26015   | 5.417024   | 2.95890107 | 3.10858833  | 2.33885915 | 266   | 400   | 196  |
| 7702      | NM_002084                     | PSMC3        | proteasome 26S subunit, ATPase    | -1.310265556 | -1.668732198 | 148.535767 | 83.641075  | 113.482018 | 7.84235858 | 7.45444311  | 7.10779184 | 8971  | 9148  | 6612 |
| 575       | NM_001042428.NM_001278158     | ZNF205       | zinc finger protein 205           | -1.014816283 | -1.669559747 | 12.520583  | 12.048804  | 7.008592   | 4.86894402 | 3.98439467  | 3.98439467 | 972   | 1280  | 716  |
| 55191     | NM_018161                     | NADSYN1      | NAD synthetase 1                  | -1.013545302 | -1.669940894 | 29.287134  | 28.933252  | 16.491909  | 6.13559407 | 6.11646066  | 5.40944022 | 2721  | 3587  | 2004 |
| 56829     | NM_020119.NM_024625           | ZC3HAV1      | zinc finger CCHC-type containing  | -1.921818798 | -1.669970203 | 26.217251  | 12.350652  | 15.057189  | 7.02925927 | 6.09804092  | 6.29679684 | 5089  | 3538  | 3748 |
| 25796     | NM_012088                     | PGLS         | 6-phosphogluconolactonase         | -1.425070196 | -1.669975036 | 69.684692  | 48.959906  | 39.213718  | 6.15325617 | 5.6507905   | 5.42690827 | 2755  | 2583  | 2029 |
| 7979      | NM_001201450.NM_001201451     | SEM1         | SEM1, 26S proteasome complex      | -1.947086217 | -1.670315642 | 290.934639 | 149.152468 | 163.281264 | 7.15215997 | 6.20038753  | 6.41879885 | 5545  | 3805  | 4083 |
| 10742     | NM_001145446.NM_001145447     | ZNF200       | zinc finger protein 200           | 1.02949212   | -1.670587728 | 7.494455   | 7.69571    | 4.154959   | 4.64055392 | 3.93836491  | 3.93836491 | 960   | 1293  | 692  |
| 7857      | NM_006862                     | SCAP         | Smf-related CREBBP activator p    | 1.00808466   | -1.6716944   | 20.660431  | 20.867382  | 11.612769  | 7.72587057 | 7.73860966  | 6.98910317 | 8272  | 11151 | 6086 |
| 70825     | NM_001286696.NM_001286697     | SRP          | zinc finger protein 79            | 1.071101463  | -1.67170989  | 3.163762   | 3.45880    | 3.850203   | 3.00545042 | 3.00545042  | 3.76813002 | 276   | 3137  | 1204 |
| 493753    | NM_001008215                  | CRCA5        | cytochrome c oxidase assembly     | -1.125975034 | -1.672052559 | 24.344038  | 21.652098  | 13.685253  | 5.42204082 | 5.25504871  | 4.73066895 | 1672  | 1952  | 1210 |
| 101752334 | NR_103728                     | PVRIG2P      | poliovirus receptor related immu  | -1.592667161 | -1.672035257 | 30.442617  | 19.129679  | 17.109926  | 5.26558691 | 4.61614023  | 4.54889714 | 1471  | 1234  | 1082 |
| 283212    | NM_001039548                  | KLHL35       | kelch like family member 35       | -1.738179223 | -1.672966545 | 0.392994   | 0.229396   | 0.225322   | 0.81895953 | 0.52452456  | 0.54161868 | 30    | 23    | 22   |
| 55027     | NM_001329729.NM_001329730     | HEATR3       | HEAT repeat containing 3          | 1.052016681  | -1.673005575 | 6.000094   | 7.571557   | 4.040356   | 4.98955224 | 5.0604688   | 4.27723085 | 1208  | 1698  | 888  |
| 51678     | NM_001303037.NM_016447        | MPP6         | membrane palmitoylated protein    | 1.230037878  | -1.673146257 | 2.039876   | 2.562812   | 1.143546   | 3.41002583 | 4.36265215  | 3.4128543  | 634   | 1042  | 466  |
| 100566113 | NM_001100594.NM_001303750     | SNF          | SNF-related kinase                | -1.433023917 | -1.673293696 | 8.209116   | 11.802383  | 4.686899   | 5.92045824 | 5.92045824  | 4.68689917 | 1638  | 2965  | 1079 |
| 101930085 | NR_136255                     | LOC101930085 | uncharacterized LOC101930085      | -1.011733495 | -1.673537241 | 3.587342   | 3.549177   | 2.011024   | 3.97240126 | 3.95664704  | 3.28994455 | 577   | 762   | 424  |
| 219931    | NM_139075                     | TPCN2        | two pore segment channel 2        | 1.183057766  | -1.673578763 | 5.668843   | 6.718405   | 3.182247   | 4.84616772 | 4.13653226  | 5.0809276  | 1090  | 1723  | 801  |
| 100131089 | NR_040059.NR_040060.NR_041    | SRP14-AS1    | SRP14 antisense RNA1 (head to     | -1.004391112 | -1.674365906 | 3.779407   | 3.062769   | 1.960736   | 2.64904502 | 2.05235145  | 2.05235145 | 207   | 217   | 152  |
| 55366     | NM_001346432.NM_018490        | UGR4         | leucine rich repeat containing G  | -8.493793914 | -1.674394969 | 2.405124   | 0.280937   | 1.346916   | 3.73086634 | 2.26020824  | 3.05850609 | 482   | 76    | 354  |
| 27340     | NM_015033                     | UTP20        | small subunit processom           | -1.080450629 | -1.674514548 | 1.961201   | 6.514548   | 1.961201   | 5.96013436 | 5.29242731  | 5.96013436 | 2932  | 2965  | 1749 |
| 140707    | NM_008026                     | BR13BP       | BR13 binding protein              | -1.36826521  | -1.674821025 | 20.964127  | 15.339588  | 11.756205  | 4.73394679 | 4.32100453  | 4.04537929 | 1020  | 1200  | 749  |
| 595135    | NR_028336                     | PGM5P2       | phosphoglucomutase 5 pseudog      | 1.1473367    | -1.675068929 | 0.784492   | 0.910824   | 0.437304   | 1.33814853 | 1.46144336  | 0.93445895 | 60    | 92    | 44   |
| 646903    | NR_036538                     | LOC646903    | uncharacterized LOC646903         | -1.214192653 | -1.675068929 | 0.792103   | 0.653473   | 0.442059   | 1.33814853 | 1.17516556  | 0.93445895 | 60    | 92    | 44   |
| 5695      | NM_002799                     | PSMB7        | proteasome subunit beta 7         | -1.221405886 | -1.675313981 | 332.329803 | 272.37912  | 186.401352 | 8.3638039  | 8.07622786  | 7.62223031 | 12894 | 14105 | 9466 |
| 368       | NM_001079528.NM_001171        | NMABCB6      | ATP binding cassette subfamily C  | -1.677193439 | -1.677298194 | 2.276643   | 1.304203   | 1.041592   | 2.72881625 | 2.12272838  | 2.12262417 | 221   | 176   | 162  |
| 696063    | NR_030832                     | SNRNP85      | small nuclear RNA, HACA box       | -1.089726451 | -1.677345062 | 1.561368   | 1.561368   | 1.14153958 | 2.14153958 | 2.14153958  | 2.14153958 | 146   | 179   | 105  |
| 91283     | NM_001198805.NM_001198806     | NMASNT03     | Myb/SANT DNA binding domain       | -1.056971579 | -1.677516409 | 21.258118  | 20.018582  | 11.812336  | 5.24925536 | 5.147147225 | 4.52832887 | 1424  | 1838  | 1066 |
| 9120      | NM_001174166.NM_004694        | SLC16A6      | solute carrier family 16 member F | -1.053966345 | -1.677538088 | 0.466293   | 0.441516   | 0.264784   | 1.48977343 | 1.44132992  | 1.05442063 | 71    | 90    | 52   |
| 199800    | NM_001101340                  | ADMS         | adrenomedullin 5 (putative)       | -1.500557582 | -1.677644579 | 12.983933  | 8.6676     | 7.269397   | 4.79281331 | 4.23306486  | 4.08112291 | 1049  | 934   | 769  |
| 9488      | NM_004485                     | PIGB         | phosphatidylinositol glycan as    | -1.2368099   | -1.677615255 | 9.960949   | 6.890189   | 4.77278965 | 4.47875754 | 4.0615736   | 4.0615736  | 934   | 1171  | 758  |
| 54981     | NM_001127603.NM_001330678     | NKAI3        | nicotianamide riboside kinase 1   | -1.530264623 | -1.678147027 | 15.868659  | 11.328017  | 6.4940596  | 4.10945474 | 3.98439467  | 3.98439467 | 1077  | 853   | 716  |
| 1151510   | NR_138433.NR_029978           | HAUS15       | HAUS15 augrin like contig         | -1.220110818 | -1.678402988 | 22.101408  | 18.422322  | 12.327073  | 4.40778273 | 4.35413683  | 4.35413683 | 654   | 695   | 464  |
| 26747     | NM_0012345                    | NUPF1        | NUPF1, FMR1 interacting prot      | 1.06342515   | -1.678968177 | 4.598523   | 4.891041   | 2.57042    | 4.05430925 | 4.13785342  | 3.36435937 | 613   | 871   | 449  |
| 100132101 | NR_036470                     | HERC2P7      | hect domain and RLD 2 pseudog     | -1.101455722 | -1.679109625 | 8.411313   | 7.649044   | 4.709254   | 3.95117646 | 3.82117143  | 3.26529764 | 568   | 689   | 416  |
| 9274      | NM_001286526.NM_004765        | BCL7C        | BCL tumor suppressor 7C           | -1.272315564 | -1.679188405 | 37.034193  | 29.104445  | 20.588077  | 5.32637993 | 4.98865526  | 4.60276393 | 1536  | 1613  | 1125 |
| 51005     | NM_001145815.NM_001330449     | AMDHD2       | amidohydrolase domain containi    | 1.588666884  | -1.679206078 | 14.145534  | 8.594332   | 4.71799337 | 4.07199337 | 3.56540872  | 4.0068703  | 914   | 2110  | 728  |
| 119392    | NM_001002759.NM_145247        | SFR1         | SWI2 dependent homologous re      | -1.339592574 | -1.679371256 | 16.548974  | 8.57274    | 9.191693   | 4.60529732 | 3.70787447  | 3.90053636 | 919   | 633   | 673  |
| 100506113 | NR_144531                     | LOC100506113 | uncharacterized LOC100506113      | -1.049308473 | -1.679490632 | 0.387207   | 0.374206   | 0.232674   | 0.34126943 | 0.22116494  | 0.22116494 | 11    | 14    | 8    |
| 101927288 | NR_047502.NR_104136           | MANEA-AS1    | MANEA antisense RNA 1 (head       | -1.357371373 | -1.679449932 | 0.125876   | 0.276056   | 0.0698974  | 0.35634914 | 0.35634914  | 0.22116494 | 11    | 20    | 8    |
| 677850    | NR_004397                     | SNORD1C      | small nucleolar RNA, CID box 1C   | 1.896382567  | -1.679449932 | 3.360817   | 1.951824   | 1.063491   | 0.35634914 | 0.61708849  | 0.22116494 | 11    | 28    | 8    |
| 283899    | NM_001304562.NM_001304563     | INO80E       | INO80 complex subunit E           | 1.016232561  | -1.679940398 | 55.496519  | 56.577387  | 30.058392  | 6.10815615 | 5.37385651  | 2669       | 3624  | 1954  |      |
| 100506881 | NR_125364                     | MKLN1-AS     | MKLN1 antisense RNA               | -1.734334095 | -1.680599681 | 0.660856   | 0.392594   | 0.362422   | 1.21691895 | 0.81765451  | 0.83750224 | 52    | 40    | 38   |
| 6204      | NM_001190977.NM_001190978     | AF2          | YY1 associated factor 2           | -1.537413862 | -1.68126819  | 1.37878    | 1.873268   | 1.448448   | 3.27933333 | 3.27933333  | 3.27933333 | 736   | 647   | 534  |
| 6204      | NM_001014.NM_001203245        | NMRP510      | ribosomal protein S10             | -1.681355251 | -1.681355251 | 602.052463 | 630.66025  | 377.663437 | 8.64680289 | 7.83390456  | 7.83390456 | 14995 |       |      |

|           |                                                          |              |                                     |              |              |             |             |             |             |             |             |        |        |        |
|-----------|----------------------------------------------------------|--------------|-------------------------------------|--------------|--------------|-------------|-------------|-------------|-------------|-------------|-------------|--------|--------|--------|
| 619383    | NR_002569                                                | SCARNA9      | small Cajal body-specific RNA 9     | -1.201927254 | -1.69272563  | 33.827023   | 28.17173    | 18.766087   | 3.65995838  | 3.4174117   | 2.9773697   | 457    | 508    | 332    |
| 11270     | NM_001270707.NM_001270708.NM_001005369.NM_001319165.DPM2 |              | nurin (nuclear envelope membra      | -1.069562222 | -1.6928823   | 22.134344   | 20.098805   | 12.048502   | 5.06613802  | 4.97210198  | 4.33610682  | 1276   | 1594   | 927    |
| 1802      | NM_001335589.NM_001319165.DPM2                           |              | DPH2 homolog                        | -1.23524585  | -1.692308593 | 15.976484   | 19.678549   | 8.893147    | 5.52920894  | 5.59865296  | 5.456414262 | 1499   | 2474   | 1089   |
| 9475      | NM_001321643.NM_004850                                   | ROCZ2        | Rho associated coiled-coil contai   | 1.034862107  | -1.69333912  | 7.088671    | 7.374306    | 3.804171    | 5.81686286  | 5.86554139  | 5.07467653  | 2174   | 3606   | 578    |
| 441242    | NR_038378.NR_103527                                      | LOC441242    | uncharacterized LOC441242           | -2.016701382 | -1.693514978 | 2.108505    | 1.036497    | 1.169062    | 2.05603457  | 1.3579479   | 1.51679491  | 124    | 82     | 90     |
| 386724    | NM_198722                                                | AMIGO3       | adhesion molecule with Ig like dc   | 1.36539077   | -1.69362647  | 3.302537    | 4.519502    | 1.835669    | 3.40287721  | 3.81532331  | 2.73414401  | 376    | 686    | 273    |
| 388722    | NM_001024594                                             | C1orf53      | chromosome 1 open reading fra       | 1.258185093  | -1.693744246 | 4.322225    | 5.438659    | 1.9554003   | 2.20853486  | 1.43197761  | 1.43197761  | 113    | 190    | 82     |
| 4528      | NM_001005369.NM_001321001.MTF2                           |              | mitochondrial translation initiat   | -1.105729154 | -1.694374876 | 33.90513    | 30.111522   | 18.557837   | 6.3903063   | 6.24712059  | 5.64141262  | 3254   | 3932   | 2362   |
| 4855      | NM_004557.NR_134049.NR_13-NOTCH4                         |              | notch-4                             | -1.043094133 | -1.69491063  | 0.130963    | 0.077203    | 0.17047     | 0.59944473  | 0.59944473  | 1.13825079  | 80     | 27     | 27     |
| 79905     | NM_001160364.NM_001300732.TMC2                           |              | transmembrane channel like 7        | -2.076790957 | -1.694942629 | 10.398738   | 9.009429    | 5.836584    | 5.48006081  | 4.45951634  | 4.74101761  | 1713   | 1102   | 1243   |
| 26519     | NM_012456                                                | TIMM10       | translocase of inner mitochondria   | -1.323324179 | -1.695192269 | 84.408287   | 63.83812    | 46.772495   | 5.81761456  | 5.42167258  | 5.07378969  | 2175   | 2196   | 1578   |
| 51122     | NM_016094.NR_135149                                      | COMMD2       | COMMD domain containing 2           | -1.442164131 | -1.695386817 | 9.64588     | 6.70011     | 5.347623    | 5.1687957   | 4.65813802  | 4.4347263   | 1373   | 1272   | 996    |
| 4550      | NR_137295                                                | RNR2         | Homo sapiens mitochondrial er       | -1.149786488 | -1.69661486  | 9075.005859 | 7901.484863 | 5026.457031 | 13.74891195 | 13.54756162 | 12.88632564 | 504050 | 628036 | 391791 |
| 100128292 | NR_024585                                                | DLG5-AS1     | DLG5 antisense RNA 1                | -2.190040891 | -1.696955663 | 0.753864    | 0.344652    | 0.416771    | 1.6852613   | 1.00745609  | 1.20457034  | 87     | 53     | 63     |
| 75017     | NM_001199815.NM_001199816.GCCT                           |              | gamma-glutamylcystine diesterase    | -1.402931857 | -1.697133461 | 66.347343   | 47.175996   | 37.332467   | 5.72338199  | 5.72338199  | 2719        | 269    | 269    |        |
| 105374952 | NR_134616.NR_134618                                      | LOC105374952 | uncharacterized LOC105374952        | 1.103200403  | -1.697337365 | 2.650223    | 2.889912    | 1.492309    | 1.98354948  | 1.98354948  | 1.45395699  | 116    | 71     | 84     |
| 100505666 | NR_040772.NR_040773                                      | DCST1-AS1    | DCST1 antisense RNA 1               | -1.467204081 | -1.697560005 | 2.354085    | 1.805864    | 1.422444    | 2.23060596  | 1.81408935  | 1.66651095  | 145    | 132    | 105    |
| 5829      | NM_001080855.NM_001243756.PXN                            |              | paxillin                            | -1.259365297 | -1.697739375 | 169.851321  | 136.487159  | 95.318476   | 9.29145012  | 8.52943608  | 7.9594387   | 24562  | 26059  | 17794  |
| 79696     | NM_001042430.NM_001330191.ZC2HC1C                        |              | zinc finger C2HC-type containi      | 1.157593852  | -1.697827493 | 1.39139     | 1.650894    | 0.81109     | 2.62541894  | 2.8044511   | 2.01587867  | 203    | 314    | 147    |
| 54512     | NM_0191037                                               | EXOSC4       | exosome component 4                 | -1.127373447 | -1.69793561  | 28.726812   | 25.493599   | 15.884471   | 4.70255223  | 4.53660777  | 3.97652431  | 983    | 1165   | 712    |
| 9826      | NM_014784.NM_198236                                      | ARHGEF11     | Rho guanine nucleotide exchang      | 1.018850366  | -1.698372624 | 7.418695    | 7.564906    | 4.105268    | 5.66591894  | 5.69233762  | 4.32142362  | 1954   | 2660   | 1415   |
| 284080    | NR_038230                                                | PICART1      | p53-inducible cancer-associated     | 1.429561099  | -1.698715681 | 1.265666    | 1.816555    | 0.892523    | 2.04717061  | 2.45415208  | 1.50747923  | 123    | 235    | 89     |
| 6432      | NM_001031684.NM_001195446.SRSF7                          |              | serine and arginine rich splicing f | -1.038349074 | -1.698730263 | 124.767099  | 120.285726  | 69.149044   | 8.2422555   | 8.18814617  | 7.48111442  | 11849  | 15247  | 8579   |
| 56243     | NM_001098500.NM_001282767.KIAA1217                       |              | KIAA1217                            | 1.426689341  | -1.69925329  | 6.14709     | 8.488367    | 3.336379    | 5.3934833   | 5.89588107  | 4.6523174   | 1611   | 3071   | 1166   |
| 101060195 | NR_134638                                                | FCF1P2       | FCF1 pseudogene 2                   | -1.19977508  | -1.699259372 | 2.628153    | 2.197488    | 1.452188    | 2.19894236  | 1.99745948  | 1.63800401  | 141    | 157    | 102    |
| 101930071 | NR_126041                                                | LOC101930071 | uncharacterized LOC101930071        | -1.118220955 | -1.699278753 | 3.212944    | 2.852643    | 1.738434    | 0.93862015  | 0.86037226  | 0.82417005  | 63     | 43     | 26     |
| 106860612 | NR_003632                                                | LOC106860612 | protein associated protein 1        | -2.554330429 | -1.699162236 | 0.157429    | 0.616239    | 0.257578    | 0.56774328  | 0.56774328  | 0.28174328  | 172    | 238    | 172    |
| 4258      | NR_125727.NR_125728.NR_12LIC100080                       |              | long intergenic non-protein codin   | -1.910281345 | -1.700605248 | 2.978422    | 1.009178    | 1.009178    | 2.38631541  | 3.04020433  | 1.80120704  | 166    | 379    | 120    |
| 12222     | NM_001204366.NM_001204367.MGST2                          |              | microsomal glutathione S-transfer   | -1.213444891 | -1.700697286 | 78.555003   | 65.241925   | 44.428749   | 6.05553602  | 5.78103713  | 5.30448591  | 2572   | 2832   | 1860   |
| 246330    | NM_00102416.NR_146090.NR_141TAF1D                        |              | mitochondrial ribosomal protein L   | 1.338933408  | -1.700909804 | 105.563148  | 58.31218    | 7.51019724  | 7.92928227  | 6.74941097  | 6.17911422  | 12734  | 1587   | 5143   |
| 84680     | NM_001098510.NM_001243135.PELI3                          |              | pellino E3 ubiquitin protein ligas  | 1.3341537    | -1.701015858 | 2.598308    | 3.424548    | 1.413011    | 2.96381946  | 4.113011    | 2.32103228  | 267    | 478    | 193    |
| 55341     | NM_001127219.NM_0032592                                  | ACCS         | L-aminocyclopropane-1-carboxyl      | -1.08626446  | -1.701286179 | 10.197962   | 8.218055    | 6.632557    | 4.48621892  | 4.35634461  | 3.77556986  | 948    | 1022   | 613    |
| 645121    | NM_01105556                                              | LCST         | keratin 7                           | -1.03604437  | -1.701690471 | 1431.875326 | 1431.875326 | 818.365231  | 11.8542371  | 11.8542371  | 10.8542371  | 96488  | 124374 | 69488  |
| 348793    | NM_001039780.NM_001287252.CCN12                          |              | cyclin I family member 2            | 1.454748484  | -1.701499187 | 0.898905    | 1.294888    | 0.488858    | 1.7191395   | 2.11639955  | 1.23026757  | 90     | 175    | 65     |
| 101060200 | NR_004398                                                | SNORD82      | WD repeat domain 53                 | -1.000455064 | -1.701583938 | 26.467924   | 25.645753   | 14.21134    | 5.45341658  | 5.45277516  | 4.70939036  | 1681   | 2245   | 1215   |
| 79101     | NM_001277291                                             | ZNF891       | zinc finger protein 891             | -1.06882498  | -1.701746773 | 1.216945    | 1.144886    | 0.669418    | 1.90722898  | 1.83736459  | 1.38699077  | 148    | 135    | 78     |
| 67329     | NM_003132                                                | LOC1067329   | TATA-box binding protein associ     | -1.543580198 | -1.701795549 | 156.160092  | 102.605978  | 84.107768   | 7.29388539  | 7.29388539  | 7.15440705  | 9449   | 8179   | 6829   |
| 79147     | NM_001039885.NM_024301                                   | FKRP         | peroxisome synthetase               | -1.099290813 | -1.702091425 | 48.908673   | 48.908673   | 24.531829   | 5.94443189  | 5.94443189  | 4.4291695   | 361    | 1163   | 3171   |
| 197407    | NM_0011214906.NM_001214907.ZNF48                         |              | fukutin related protein             | 1.09507640   | -1.702387229 | 13.359036   | 14.86741    | 7.364718    | 5.51089507  | 5.63924869  | 4.76539014  | 1751   | 2562   | 1265   |
| 5080      | NM_0002080.NM_001127612.NMPAX6                           |              | zinc finger protein 48              | 1.182270477  | -1.702478279 | 6.234422    | 7.323557    | 3.588979    | 4.37965714  | 4.61052026  | 3.65976826  | 778    | 1229   | 556    |
| 25826     | NR_004398                                                | SNORD82      | paired box 6                        | -12.77067362 | -1.702521606 | 1.256273    | 1.047471    | 0.592207    | 3.05029974  | 0.65251278  | 2.40802423  | 288    | 30     | 208    |
| 768220    | NR_030527                                                | MIR765       | small nucleolar RNA, CID box 82     | 1.489387219  | -1.702535021 | 2.130892    | 0.104552    | 0.131441    | 0.23670415  | 0.3412894   | 0.14214747  | 7      | 14     | 5      |
| 5597      | NM_00104160                                              | MIR765       | microRNA 765                        | 1.068150199  | -1.702535021 | 1.42008     | 1.624105    | 0.817654    | 0.23670415  | 0.25173066  | 0.14214747  | 7      | 14     | 5      |
| 140890    | NM_001077199.NM_001270492.SREK1                          |              | peptide YY                          | -1.32939412  | -1.702606121 | 0.171904    | 0.1280621   | 0.02670415  | 0.23670415  | 0.18071326  | 0.14214747  | 7      | 14     | 5      |
| 102465463 | NR_106830                                                | MIR6772      | specifying regulatory glutamic acid | -1.17566083  | -1.702622987 | 65.122161   | 55.376368   | 36.124085   | 8.75342941  | 8.52007625  | 7.98801062  | 16904  | 19212  | 12211  |
| 6634      | NM_001278656.NM_004175.NR_SNRPD3                         |              | microRNA 6772                       | 1.077414227  | -1.702859203 | 10.046567   | 10.951616   | 5.538827    | 0.71085839  | 0.75384785  | 0.45078734  | 25     | 36     | 18     |
| 102465976 | NM_00108685                                              | MIR6807      | small nuclear ribonucleoprotein E   | 1.039093935  | -1.702881438 | 132.999358  | 70.58865    | 8.88997849  | 7.58865     | 8.88997849  | 8.94519034  | 18286  | 25804  | 13424  |
| 7072      | NM_001351508.NM_001351509.TIA1                           |              | microRNA 6807                       | -1.105316636 | -1.702959375 | 32.54675    | 29.884135   | 17.145579   | 1.97422731  | 1.86782539  | 1.4430085   | 115    | 139    | 83     |
| 55703     | NM_001160708.NM_018082                                   | POLR3B       | TIA1 cytotolic granule associat     | 1.088018905  | -1.703680446 | 25.826728   | 27.466434   | 15.387749   | 6.80279412  | 6.92345485  | 6.04317798  | 4344   | 6315   | 3136   |
| 55003     | NM_00127906                                              | PAK1IP1      | carboxyl reductase 3                | -1.05651934  | -1.703680446 | 2.51651934  | 3.331399    | 4.70839     | 3.36690981  | 2.20251232  | 2.20251232  | 179    | 262    | 159    |
| 220136    | NM_145020                                                | CFAP53       | RNA polymerase III subunit B        | -1.253936964 | -1.703839395 | 3.736801    | 2.982326    | 2.052449    | 4.04088777  | 3.74527057  | 3.34096163  | 611    | 651    | 411    |
| 54815     | NM_001300946.NM_0017680                                  | GATAD2A      | PAK1 interacting protein 1          | -1.084506183 | -1.70391643  | 18.163643   | 18.163643   | 9.0843596   | 4.89020329  | 4.77725916  | 4.15509812  | 1125   | 1386   | 842    |
| 129450    | NM_001039693.NR_004862.NR_TYV5                           |              | clia and flagella associated prote  | 1.226802163  | -1.704472516 | 1.215655    | 1.487352    | 0.66977     | 1.67378945  | 1.88281796  | 1.19154816  | 486    | 141    | 62     |
| 55111     | NM_001039693.NR_004862.NR_TYV5                           |              | GATA zinc finger domain contain     | -1.130440645 | -1.704595222 | 18.299546   | 18.299546   | 11.282715   | 6.79487312  | 6.196771    | 6.03454393  | 4320   | 5106   | 3117   |
| 131566    | NM_0080927                                               | DCBLD2       | RNA-yW synthesizing protein 5       | -1.068154313 | -1.7046161   | 7.069882    | 6.643216    | 3.904356    | 5.24247449  | 5.14994432  | 4.49559959  | 1447   | 1810   | 1044   |
| 51118     | NM_016037                                                | UTP11        | large 60S subunit nuclear export    | -1.01332001  | -1.70465226  | 65.1332001  | 65.133200   | 31.603302   | 7.54665111  | 7.54665111  | 6.86229305  | 1376   | 1870   | 11570  |
| 116028    | NM_152308.NR_130754                                      | RM12         | disordin, CUB and LCCL domain       | 1.108901199  | -1.704847804 | 161.608154  | 179.403732  | 89.0765     | 9.90645026  | 10.0543385  | 9.13786347  | 3637   | 55767  | 27154  |
| 285429    | NM_001029955                                             | DCAF4L1      | UTP11, small subunit processom      | -1.209092834 | -1.705274769 | 30.714828   | 25.603569   | 16.925444   | 5.96136766  | 5.7018798   | 5.50255546  | 2407   | 2678   | 1736   |
| 53980     | NM_178983.NR_110933                                      | SCTD13       | RecQ mediated genome instabili      | -1.054461826 | -1.705464608 | 33.790967   | 33.790967   | 19.568572   | 5.68881209  | 5.59384468  | 4.9184589   | 1958   | 2481   | 1412   |
| 7696      | NM_002936.NR_135104.NR_13-LOC101928674                   |              | DOB1 and CUL4 associated fact       | 1.673143321  | -1.705771104 | 0.509143    | 0.85028     | 0.277737    | 1.75224037  | 2.31185141  | 1.25551499  | 93     | 235    | 237    |
| 7741      | 143244                                                   | NM_001099692 | DEAD-box helicase 55                | -1.163134552 | -1.70604867  | 24.507999   | 24.507999   | 12.774005   | 6.42107909  | 6.02987959  | 5.66221147  | 3325   | 3078   | 697    |
| 26973     | NM_001023560.NM_00111039.ZSCAN26                         |              | zinc finger and SCAN domain co      | -1.089433942 | -1.70619981  | 4.887147    | 4.676343    | 2.786907    | 3.85794988  | 3.743218    |             |        |        |        |

|           |                                    |                              |                                     |              |               |            |             |            |             |             |             |      |       |      |
|-----------|------------------------------------|------------------------------|-------------------------------------|--------------|---------------|------------|-------------|------------|-------------|-------------|-------------|------|-------|------|
| 221442    | NR_026938                          | ADCY10P1                     | adenylate cyclase 10, soluble psi   | -1.52838641  | -1.716838361  | 0.540565   | 0.355893    | 0.295466   | 1.77389308  | 1.36863803  | 1.26797492  | 95   | 83    | 68   |
| 441461    | NR_038853                          | STX17-AS1                    | STX17 antisense RNA, CNA bio        | -1.168354806 | -1.716966316  | 1.296057   | 1.124465    | 0.723854   | 0.68708806  | 0.68708806  | 0.49997203  | 28   | 37    | 20   |
| 692109    | NR_030567                          | SNORD69                      | small nucleolar RNA, CID box 69     | -1.011076816 | -1.716965316  | 9.46946    | 9.345347    | 5.040117   | 0.77698602  | 0.77698602  | 0.49997203  | 28   | 37    | 20   |
| 101928979 | NR_125967.NR_125968                | UNC07119                     | long intergenic non-protein codin   | 1.247131465  | -1.717195738  | 2.75368    | 3.333796    | 1.9721644  | 1.32870978  | 2.38433212  | 1.32870978  | 102  | 194   | 174  |
| 4729      | NM_021074                          | NDUUF2                       | NADH:ubiquinone oxidoreductas       | -1.362105194 | -1.7171991857 | 240.294632 | 176.60704   | 131.432297 | 7.77214475  | 7.32869063  | 6.99614154  | 8543 | 8380  | 6116 |
| 26774     | NR_003940                          | SNORD80                      | small nucleolar RNA, CID box 80     | -1.35050521  | -1.720872209  | 171.655319 | 127.157684  | 93.613983  | 3.68588817  | 3.29105133  | 2.98115841  | 466  | 461   | 333  |
| 5914      | NM_000694.NM_001024809.NMRARA      |                              | retinoic acid receptor alpha        | 1.2987407014 | -1.721099551  | 11.300022  | 14.890951   | 6.059794   | 5.24247649  | 5.61082803  | 4.48629114  | 1447 | 2511  | 1034 |
| 80308     | NM_001184891.NM_001184892.FLA01    |                              | flavin adenine dinucleotide synth   | -1.325296302 | -1.721268739  | 37.490578  | 30.669772   | 20.912938  | 5.92785643  | 5.92785643  | 5.4585071   | 2904 | 3141  | 2075 |
| 79180     | NM_024529                          | EFHD2                        | EF-hand domain family member        | 1.17897304   | -1.721419584  | 10.4254057 | 120.2715584 | 55.525123  | 7.91327995  | 8.14653143  | 7.13397933  | 9425 | 14843 | 6734 |
| 232402    | NM_015201                          | CDK4                         | block of proliferation 1            | 1.094014472  | -1.721505647  | 40.9840482 | 44.893124   | 22.373083  | 6.91274502  | 6.74111294  | 5.83963369  | 3803 | 5559  | 273  |
| 8815      | NM_001143085.NM_003860             | BANF1                        | barrier to autointegration factor 1 | -1.035105812 | -1.721726113  | 146.50597  | 141.760601  | 79.8756    | 7.35678829  | 7.30731815  | 6.57925295  | 6396 | 8256  | 4569 |
| 51535     | NM_001143787.NM_001143788.PPHLN1   |                              | periplin 1                          | -1.092420895 | -1.722222952  | 36.605052  | 33.931491   | 21.342172  | 6.20198918  | 6.07626548  | 5.43176167  | 2851 | 3487  | 2036 |
| 64785     | NM_001126129.NM_001126130.GIN53    |                              | GIN5 complex subunit 3              | 1.224310253  | -1.72251395   | 10.672896  | 12.827708   | 5.239815   | 4.87515868  | 3.8503285   | 5.99414465  | 409  | 1487  | 649  |
| 84288     | NM_001143943.NM_001290327.EFOAB2   |                              | EF-hand calcium binding domain      | 1.064018701  | -1.722528955  | 5.770644   | 5.128535    | 3.24129226 | 3.3216324   | 2.56269567  | 332         | 472  | 237   |      |
| 79180     | NM_001319675.NM_001347934.METTL25  |                              | methyltransferase like 25           | 1.7611118    | -1.723061257  | 1.761118   | 1.132746    | 2.46826542 | 1.68000215  | 1.78        | 178         | 127  |       |      |
| 152877    | NM_001313622.NM_001174070.FAM63A   |                              | family with sequence similarity 5/  | -1.111232752 | -1.72409045   | 0.795004   | 0.722339    | 1.76310734 | 1.65726059  | 1.76310734  | 1.65726059  | 94   | 113   | 67   |
| 22941     | NM_012309.NM_133266.NR_11          | SHANK2                       | SH3 and multiple ankyrin repeat     | -1.427953937 | -1.72416573   | 4.420618   | 3.099713    | 2.408989   | 5.5277836   | 5.027119    | 4.76429118  | 1772 | 1658  | 1284 |
| 79590     | NM_024540.NM_145729                | MRPL24                       | mitochondrial ribosomal protein L   | -1.049789826 | -1.724518623  | 112.294007 | 107.537163  | 61.281412  | 6.65310266  | 6.58371374  | 5.87722811  | 3912 | 4979  | 2790 |
| 253039    | NR_024408                          | PSMD5-AS1                    | PSMD5 antisense RNA 1 (head 1       | 1.094505479  | -1.724663205  | 5.684243   | 6.229832    | 3.09892    | 4.46199571  | 4.58668388  | 3.72223259  | 826  | 1208  | 589  |
| 9602      | NM_002509                          | CEP135                       | centrosomal protein 135             | -1.150834845 | -1.724716783  | 4.816758   | 4.188002    | 2.622201   | 4.8026342   | 4.60714063  | 4.05259921  | 1056 | 1226  | 753  |
| 79691     | NM_001256835.NM_001256836.CTR12    |                              | guanine RNA-ribosyltransferase      | 1.465250646  | -1.724939174  | 15.527208  | 23.133442   | 8.507578   | 5.92433148  | 5.64679377  | 5.15485706  | 2345 | 4691  | 1672 |
| 116228    | NM_001312871.NM_001312872.COX20    |                              | COX20, cytochrome c oxidase at      | -1.264235545 | -1.725230628  | 18.164315  | 14.54375    | 9.844264   | 5.48903517  | 5.15920994  | 4.72520995  | 1724 | 1822  | 1229 |
| 200634    | NM_001168364.NM_001321325.KRTCAP3  |                              | keratinocyte associated protein 3   | -1.860243533 | -1.725639505  | 58.534118  | 31.249966   | 31.869329  | 5.69742004  | 4.82558505  | 4.93026678  | 1998 | 1435  | 1490 |
| 10539865  | NR_146533.NR_146534.NR_14          | PPP1R12A-AS1                 | PPP1R12A antisense RNA 1            | 1.51126598   | -1.725852649  | 0.945299   | 1.028129    | 0.47834    | 1.21691895  | 1.33632702  | 0.82086496  | 52   | 80    | 37   |
| 101927352 | NR_110383.NR_110384                | PLS3-AS1                     | PLS3 antisense RNA 1                | -1.825272857 | -1.725852649  | 0.653728   | 0.357272    | 0.356188   | 1.21691895  | 0.7861039   | 0.82086496  | 52   | 38    | 37   |
| 4710      | NM_001168531.NM_004547             | NDUFB4                       | NADH:ubiquinone oxidoreductas       | 1.10685609   | -1.725948108  | 271.729917 | 298.862496  | 143.630907 | 7.40874912  | 7.5543921   | 6.62749283  | 6632 | 9808  | 4726 |
| 54878     | NM_001163424.NM_138336             | COPR1                        | COP9 signalosome subunit 9          | -1.03031561  | -1.726147718  | 96.529529  | 96.529529   | 52.5338    | 5.39313038  | 5.39313038  | 4.91897103  | 1648 | 2137  | 1174 |
| 195339    | NM_001199017.NM_001199018.LRRCA4   |                              | leucine rich repeat containing ad   | 1.424837334  | -1.726874129  | 3.026644   | 1.146264    | 3.28122930 | 3.332524    | 2.26843599  | 2.26843599  | 268  | 476   | 178  |
| 51250     | NM_001142468.NM_001142470.C6orf203 |                              | chromosome 6 open reading fram      | -1.010170222 | -1.727061725  | 7.925141   | 7.547352    | 4.318972   | 3.39939883  | 3.38618649  | 2.70684712  | 375  | 496   | 267  |
| 10942     | NM_001270452.NM_006799.NMPPRSS21   |                              | protease, serine 21                 | 1.842206492  | -1.727149613  | 21.891057  | 40.461257   | 11.826595  | 4.67260671  | 5.52801678  | 3.92456518  | 962  | 2368  | 685  |
| 254778    | NM_152765                          | LC8orf46                     | chromosome 8 open reading fram      | 1.597751391  | -1.727179583  | 1.277606   | 2.051792    | 0.695947   | 2.41415945  | 2.98550663  | 1.80974547  | 170  | 363   | 147  |
| 286256    | NM_178536                          | LCN12                        | lipocalin 12                        | -1.68913731  | -1.727305687  | 1.411021   | 0.837196    | 0.770746   | 0.97665845  | 0.65251278  | 0.64076093  | 38   | 30    | 27   |
| 7551      | NM_001278284.NM_001278287          | zinc finger protein 3        | zinc finger protein 3               | -1.844132704 | -1.728256248  | 12.4222    | 1.728256248 | 5.91893269 | 5.107486198 | 5.107486198 | 5.107486198 | 2424 | 1756  | 225  |
| 101926941 | NR_120664                          | LOC101926941                 | uncharacterized LOC101926941        | 1.25459665   | -1.728524475  | 1.358663   | 1.722707    | 0.725982   | 0.83964067  | 0.99371033  | 0.54161868  | 31   | 52    | 22   |
| 100507431 | NR_125383                          | LOC100507431                 | uncharacterized LOC100507431        | -1.721526069 | -1.728524475  | 0.54942    | 0.313486    | 0.289296   | 0.83964067  | 0.54351856  | 0.54161868  | 31   | 24    | 22   |
| 101927217 | NR_110218                          | LINC01473                    | long intergenic non-protein codin   | -1.795912586 | -1.728524475  | 1.317702   | 0.73086     | 0.707534   | 0.83964067  | 0.52452456  | 0.54161868  | 31   | 23    | 22   |
| 641977    | NR_024271                          | SEPT7P2                      | septin 7 pseudogene 2               | 1.4444004356 | -1.728296953  | 4.363263   | 3.023814    | 2.372828   | 3.39591204  | 2.92523142  | 2.70236644  | 374  | 346   | 266  |
| 100190986 | NM_001248496                       | uncharacterized LOC100190986 | uncharacterized LOC100190986        | 1.072017     | -1.728053641  | 1.3308152  | 0.7203641   | 3.841953   | 4.31829479  | 4.31829479  | 4.14189369  | 658  | 994   | 688  |
| 22881     | NM_001242809.NM_001242811          | ANKRD6                       | ankyrin repeat domain 6             | -1.69089813  | -1.729527139  | 2.191489   | 1.733587    | 1.97277    | 3.72809494  | 3.04336424  | 3.01481644  | 481  | 380   | 342  |
| 23131     | NM_001020909.NM_001304939          | GPATCH8                      | G-patch domain containing 8         | -1.060025574 | -1.729629218  | 27.314192  | 25.711621   | 14.813963  | 7.53477982  | 7.4511464   | 6.74996625  | 7241 | 9127  | 5149 |
| 100133315 | NR_029192                          | LOC100133315                 | transient receptor potential calor  | -1.124081718 | -1.729895724  | 1.432634   | 1.281989    | 0.773175   | 1.46336426  | 1.3579479   | 1.10605517  | 82   | 49    | 49   |
| 144132    | NM_144666.NM_173589                | DNH1D1                       | dynein heavy chain domain 1         | -1.724475501 | -1.730332306  | 7.072978   | 4.504404    | 6.3610997  | 5.58756701  | 5.58756701  | 5.58756701  | 3188 | 2470  | 2266 |
| 6649      | NM_003102                          | SOD3                         | superoxide dismutase 3              | 2.987883918  | -1.730883779  | 1.703552   | 4.428956    | 0.921048   | 1.82664349  | 2.92523142  | 1.30472178  | 100  | 346   | 71   |
| 29103     | NM_01530221                        | TMEM133                      | transmembrane protein 133           | -1.12100216  | -1.731225896  | 1.444262   | 0.751502    | 0.867502   | 2.86507368  | 2.86507368  | 2.20273081  | 145  | 292   | 145  |
| 29103     | NM_015328                          | DNAJC15                      | DnaJ heat shock protein family (I   | 1.024515075  | -1.73122895   | 14.623891  | 16.823891   | 7.518805   | 5.25558691  | 5.33093141  | 4.50088019  | 1471 | 2072  | 1045 |
| 441294    | NM_001008747                       | CTAGE15                      | CTAGE family member 15              | -1.673849851 | -1.731602086  | 3.095666   | 1.856158    | 1.680167   | 3.14071816  | 2.50348775  | 2.46326383  | 307  | 245   | 218  |
| 404672    | NM_207118                          | GTF2H5                       | general transcription factor IIH su | -1.204972187 | -1.731849547  | 3.724738   | 3.094396    | 2.020396   | 4.81517582  | 4.55661355  | 4.05978318  | 1066 | 1182  | 757  |
| 29854     | NM_00106655.NM_001350178           | FAM149A                      | family with sequence similarity 14  | -4.8622958   | -1.731936282  | 0.513599   | 0.10845     | 0.280518   | 0.36283869  | 0.85412573  | 0.55        | 15   | 39    | 95   |
| 64799     | NM_001031715.NM_001284347          | IQCH                         | IQ motif containing H               | 1.14668141   | -1.73194374   | 0.989577   | 1.184098    | 0.483657   | 2.05603457  | 2.20853486  | 1.4969322   | 124  | 190   | 88   |
| 100190986 | NR_110802                          | RUNDC3A                      | RUNDC3A antisense RNA 1             | 1.12857947   | -1.7319703    | 0.636567   | 0.128579    | 0.345077   | 2.05603457  | 2.19051262  | 1.4969322   | 124  | 190   | 88   |
| 83990     | NM_003203                          | BRIP1                        | BRCA1 interacting protein C-term    | -1.24500265  | -1.733239198  | 9.541947   | 7.672349    | 5.176975   | 6.26450698  | 5.95293607  | 5.48543279  | 2979 | 3197  | 2115 |
| 51053     | NM_001251989.NM_001251990          | GMNN                         | geminin, DNA replication inhibito   | -1.073651193 | -1.733219057  | 32.78794   | 30.132396   | 17.412699  | 5.28267998  | 5.18287427  | 4.51662904  | 1489 | 1853  | 1057 |
| 2286      | NM_001135208.NM_004470.NMFKBP2     |                              | FKBP5 binding protein 2             | -1.084072245 | -1.732562299  | 163.837478 | 151.91184   | 89.729506  | 6.8350162   | 6.7196144   | 6.05131022  | 4443 | 5476  | 3154 |
| 26808     | NR_000013                          | SNORD42B                     | small nucleolar RNA, CID box 42     | 1.625011221  | -1.733974406  | 6.460099   | 10.633597   | 3.46479    | 0.5190475   | 0.77006002  | 0.32020933  | 17   | 37    | 37   |
| 3592      | NM_000882                          | L12A                         | interleukin 12A                     | -2.136860085 | -1.734004172  | 34.313245  | 1.597794    | 8.55329    | 2.53954085  | 1.70021226  | 1.91649468  | 189  | 118   | 134  |
| 28942     | NM_002452.NM_199498.NM_19          | NUDT17                       | nucleoside diphosphate kinase 1     | -1.656815144 | -1.734130048  | 51.762391  | 31.682441   | 16.763817  | 5.17491202  | 4.47239429  | 4.40936329  | 1379 | 1172  | 255  |
| 51193     | NM_001303425.NM_001303426          | ZNF639                       | zinc finger protein 639             | -1.064967885 | -1.734443291  | 24.984268  | 23.417081   | 6.20985367 | 6.12041926  | 5.62983634  | 5.2973697   | 3597 | 2033  | 603  |
| 2842      | NM_006143                          | GPR19                        | G protein-coupled receptor 19       | -1.074380259 | -1.735920071  | 4.681646   | 4.356509    | 2.529942   | 3.16140171  | 3.06980877  | 2.74296329  | 312  | 388   | 221  |
| 2650      | NM_001097633.NM_001097634          | GCNT1                        | glucosaminyl (N-acetyl) transfera   | 1.646271646  | -1.736445316  | 3.06293    | 1.68271     | 2.354417   | 4.61378867  | 5.14373402  | 3.86028525  | 922  | 1802  | 653  |
| 79891     | NM_001321375.NM_001321376          | ZNF671                       | zinc finger protein 671             | -1.409826366 | -1.738989947  | 2.860722   | 2.004483    | 1.544792   | 2.96361946  | 2.541776    | 2.29695121  | 267  | 275   | 189  |
| 643161    | NM_0011461567                      | FAM52A                       | family with sequence similarity 2/  | -1.73742838  | -1.73868968   | 1.137111   | 0.73742838  | 2.24473    | 0.50527713  | 0.68938927  | 0.58        | 58   | 22    | 41   |
| 11077     | NM_007031                          | HSF2BP                       | heat shock transcription factor 2   | -1.125743791 | -1.738552299  | 1.030261   | 0.908892    | 1.05743791 | 1.54118428  | 1.43116693  | 1.0873498   | 75   | 89    | 53   |
| 5552      | NM_001321053.NM_0                  |                              |                                     |              |               |            |             |            |             |             |             |      |       |      |

|           |                                       |              |                                      |               |              |            |             |             |             |             |             |       |       |
|-----------|---------------------------------------|--------------|--------------------------------------|---------------|--------------|------------|-------------|-------------|-------------|-------------|-------------|-------|-------|
| 251       | NM_013313                             | ALPPL2       | alkaline phosphatase, placental I    | -2.719414598  | -1.74976225  | 9.563148   | 3.513538    | 5.131237    | 4.59870169  | 3.25405394  | 912         | 448   | 641   |
| 100507670 | NR_135959                             | LOC100507670 | uncharacterized LOC100507670         | -1.609082025  | -1.750158768 | 3.929064   | 2.449033    | 2.11426     | 1.76310734  | 1.31437719  | 1.24294651  | 78    | 66    |
| 841       | NM_01080124.NM_01080125               | CASBPB       | casein 8B                            | 1.250056763   | -1.75308819  | 32.02174   | 39.344015   | 16.899013   | 6.4360106   | 6.75467519  | 5.64081394  | 3360  | 5612  |
| 10634     | NM_01278730.NM_006478.NM_GAS2.1       | NM_GAS2.1    | growth arrest specific 2 like 1      | -2.24447015   | -1.750738651 | 6.044046   | 2.895119    | 3.7007      | 3.97474042  | 2.91787176  | 3.23384841  | 378   | 403   |
| 400999    | NR_033871                             | FLJ42351     | uncharacterized LOC400999            | -2.173903671  | -1.751108402 | 3.375356   | 1.540143    | 1.793453    | 1.43646283  | 0.83317479  | 0.98063768  | 47    | 47    |
| 26278     | NM_012778055.NM_014363                | SACS         | sacsin molecular chaperone           | -1.106712386  | -1.751481187 | 0.64413    | 0.581888    | 0.344051    | 3.43720745  | 3.30503223  | 2.72513523  | 386   | 466   |
| 9749      | NM_01100164.NM_0100165                | PHACTR2      | phosphatase and actin regulator      | -1.384916226  | -1.751751663 | 1.25639    | 0.887979    | 0.664172    | 3.64828273  | 3.22198991  | 2.9225564   | 453   | 437   |
| 114796    | NR_021487.NR_027328.NR_027329         | PSMG3-AS1    | PSMG3 antisense RNA 1 (head 1)       | 1.215961655   | -1.75203337  | 1.052787   | 1.02841     | 0.60015     | 2.648807034 | 2.72348335  | 1.86002015  | 181   | 294   |
| 79086     | NM_01204856.NM_024541.NR_SCN1A1       | SCN1A1       | sodium channel modifier 1            | 1.12616162    | -1.752411736 | 1.12616162 | 1.12616162  | 0.800433    | 4.46821892  | 4.56248855  | 3.73574288  | 948   | 1276  |
| 389862    | NM_01033505.NM_012552                 | BOL-AS1      | bola family member 3                 | 1.11352655    | -1.75307763  | 58.536278  | 48.231433   | 26.536278   | 4.87023937  | 4.721014427 | 4.96629334  | 1109  | 1331  |
| 10069     | NM_01320724.NM_016940                 | RWDD2B       | RWD domain containing 2B             | 1.126285751   | -1.753147846 | 16.97957   | 18.938827   | 0.950402    | 4.89515141  | 5.06129275  | 4.12116227  | 1129  | 1699  |
| 283932    | NR_024348                             | FBXL19-AS1   | FBXL19 antisense RNA 1 (head 1)      | 1.48133813    | -1.753190719 | 1.971089   | 2.461138    | 1.057289    | 3.10272366  | 3.38881456  | 2.41366048  | 298   | 497   |
| 100506054 | NR_038429.NR_038430.NR_031RNASEH1-AS1 | RNASEH1-AS1  | RNASEH1 antisense RNA 1              | 1.260134799   | -1.753318577 | 3.419395   | 4.394643    | 1.865543    | 2.44147625  | 1.81825156  | 1.81825156  | 126   | 122   |
| 29896     | NM_01282757.NM_01282758               | TRA2A        | transformer 2 alpha homolog          | -1.529894198  | -1.755193045 | 88.533552  | 59.387628   | 48.096765   | 7.45094454  | 6.84189146  | 6.64551066  | 6830  | 5965  |
| 121658    | NM_01144951.NM_145062                 | NR_DLYCTK    | glycerol kinase                      | -1.64008803   | -1.755397067 | 0.806103   | 0.432273    | 0.371578    | 1.7191395   | 1.2578953   | 1.20457043  | 90    | 73    |
| 79962     | NM_01304944.NM_024902                 | DNAJC22      | DnaJ heat shock protein family (I)   | -1.422249341  | -1.755432666 | 1.462729   | 1.030367    | 0.781446    | 2.86618886  | 2.43801707  | 1.29620105  | 247   | 232   |
| 102723354 | NR_110546                             | LINC02298    | long intergenic non-protein codin    | -2.962923712  | -1.755562077 | 2.893502   | 0.958955    | 1.541321    | 1.82664439  | 0.89363826  | 1.29257653  | 100   | 45    |
| 54970     | NM_01318533.NM_001352037              | TTC12        | tetratricopeptide repeat domain 1    | 1.040686012   | -1.755706424 | 5.184928   | 5.378756    | 2.792372    | 3.73639016  | 3.78969848  | 3.00368412  | 484   | 673   |
| 645811    | NM_011143980                          | CCDC154      | coiled-coil domain containing 154    | -1.771281885  | -1.755905021 | 1.541044   | 0.872499    | 0.828503    | 2.10810423  | 1.52015496  | 1.52834475  | 130   | 98    |
| 4256      | NM_000900.NM_001190839                | MGP          | matrix Gla protein                   | -1.158422125  | -1.765356363 | 4.218456   | 3.645719    | 2.254958    | 3.11125378  | 2.92523142  | 2.41926694  | 300   | 346   |
| 26108     | NM_01330326.NM_015617                 | PYGO1        | pygopus family PHD finger 1          | -1.599492525  | -1.757160874 | 0.619764   | 0.316118    | 0.329743    | 1.76638114  | 1.86820921  | 1.86820921  | 183   | 126   |
| 401505    | NM_00101790.NM_001134484              | TOMM5        | translocase of outer mitochondri     | -1.154609545  | -1.757952284 | 11.101736  | 95.199146   | 58.693192   | 6.35572529  | 6.15092915  | 5.55508238  | 3176  | 3675  |
| 2542      | NM_01164277.NM_001164278              | SLC37A4      | solute carrier family 37 member +    | -2.552654259  | -1.758110813 | 19.390937  | 7.910985    | 11.13762    | 5.51337462  | 4.20947297  | 4.72302988  | 1754  | 918   |
| 340390    | NM_01316309                           | WDR97        | WD repeat domain 97                  | -1.00208939   | -1.758145264 | 0.48178    | 0.483108    | 0.256961    | 1.75224037  | 1.75012126  | 1.23026757  | 93    | 124   |
| 1933      | NM_01037663.NM_001959.NMEEF1B2        | EEF1B2       | eukaryotic translation elongation    | -1.051934178  | -1.758183478 | 419.313861 | 395.723412  | 1.758183478 | 6.89858615  | 6.62572156  | 7.88712339  | 16272 | 20668 |
| 6936      | NM_01201334.NM_001201335              | CNAPC5       | GC-rich sequence DNA-binding I       | -1.041012769  | -1.759105614 | 8.692818   | 8.444155    | 5.315083    | 4.92085417  | 4.66481307  | 4.14161942  | 1150  | 1476  |
| 92922     | NM_01206503.NM_153001                 | PSMA4        | proteasome 26S subunit, ATPase       | -1.1381568457 | -1.759105614 | 114.568457 | 114.568457  | 6.759105614 | 6.759105614 | 6.759105614 | 6.759105614 | 8373  | 10438 |
| 100616668 | NR_038258.NR_038259                   | TPTE2P5      | transmembrane phosphoinositide       | 1.110951953   | -1.760132635 | 0.195738   | 0.217569    | 0.104824    | 0.08813425  | 0.051166931 | 0.051166931 | 33    | 49    |
| 100125556 | NR_024250.NR_024251                   | FAM86JP      | family with sequence similarity 86   | 1.629328577   | -1.76062866  | 2.161538   | 3.655583    | 1.91619     | 2.40724866  | 3.00276575  | 1.78395874  | 169   | 368   |
| 51642     | NM_01318498.NM_001318499              | MRPL48       | mitochondrial ribosomal protein L    | -1.051062233  | -1.760844515 | 25.799482  | 24.597313   | 13.849493   | 4.66248513  | 4.59353508  | 3.88880246  | 955   | 1214  |
| 55205     | NM_01318728.NM_001318727              | ZNF532       | zinc finger protein 532              | -1.038421708  | -1.761292057 | 5.536399   | 5.003871    | 2.870004    | 5.07032524  | 5.12313239  | 4.37358531  | 1329  | 1710  |
| 55163     | NM_01018129                           | PNPO         | pyridoxamine 5-phosphate oxida       | -1.299269256  | -1.761498714 | 27.514631  | 21.197769   | 14.679621   | 6.17891636  | 5.565216475 | 5.47589563  | 3645  | 3748  |
| 404448    | NM_01330694                           | PRK2P2       | nuclear pore complex interacting     | -1.174431005  | -1.761741804 | 46.717431  | 32.761789   | 25.5521     | 6.549718056 | 6.549718056 | 6.549718056 | 2318  | 2318  |
| 203328    | NM_01348002.NM_173550                 | CCDC171      | coiled-coil domain containing 171    | 1.009237536   | -1.762404391 | 0.253442   | 0.256463    | 0.135265    | 1.42282133  | 1.43116693  | 0.96541723  | 66    | 89    |
| 23529     | NM_001166212.NM_0132346               | CLCF1        | cardiolipin like cytokine factor     | -1.150921659  | -1.762452491 | 50.874796  | 44.281609   | 26.993768   | 6.31846728  | 5.71321819  | 5.71321819  | 3561  | 4134  |
| 27148     | NM_01243313.NM_0015690                | STK36        | serine/threonine kinase 36           | 1.28316026    | -1.763286313 | 11.914552  | 15.293225   | 6.363544    | 5.85808894  | 6.21230621  | 5.0586295   | 2238  | 3837  |
| 10302     | NM_001329613.NM_001329614             | SNAPC5       | small nuclear RNA activating co      | -1.281341168  | -1.76382553  | 15.354022  | 11.936473   | 6.156436    | 4.07233457  | 3.64312491  | 3.64312491  | 796   | 830   |
| 92922     | NM_001113525.NM_152287                | NR_152287    | zinc finger protein 276              | -1.26159719   | -1.764238663 | 23.7656179 | 23.76423866 | 13.76423866 | 6.089611092 | 6.089611092 | 6.089611092 | 4045  | 530   |
| 6182      | NM_002949                             | MRPL12       | mitochondrial ribosomal protein L    | -1.02969363   | -1.764591613 | 160.594238 | 156.147171  | 85.510635   | 7.31931512  | 7.27749287  | 6.50685138  | 6231  | 8086  |
| 12841     | NM_01282524                           | NP1PB6       | nuclear pore complex interacting     | 1.755436466   | -1.764736705 | 0.84936    | 1.498124    | 0.449864    | 1.11880553  | 1.61299082  | 0.73352601  | 46    | 108   |
| 284716    | NM_173642                             | RIMKL1       | ribosomal modification protein       | 4.462106908   | -1.764854848 | 0.029703   | 0.14356     | 0.016983    | 0.41264541  | 1.31437719  | 0.24657076  | 13    | 78    |
| 101928000 | NR_135657.NR_135658                   | LOC101928000 | uncharacterized LOC101928000         | 1.492812108   | -1.764854848 | 0.662932   | 1.014534    | 0.350905    | 0.80777243  | 0.41264541  | 0.24657076  | 13    | 26    |
| 653404    | NM_001085478                          | FOXO4L6      | forkhead box D4-like 6               | -1.084841227  | -1.764854848 | 0.120006   | 0.112865    | 0.06147     | 0.41264541  | 0.38406669  | 0.24657076  | 13    | 16    |
| 1001939   | NM_001297590.NM_012099                | PRK2P2       | CC326 molecule associated with       | -1.058242238  | -1.76528512  | 13.241163  | 12.528515   | 7.042451    | 5.39395028  | 5.39395028  | 5.39395028  | 162   | 162   |
| 285590    | NM_0010177995.NM_001308175            | SH3PXD2B     | SH3 and PX domains 2                 | -1.28176034   | -1.766392454 | 1.216074   | 0.880393    | 0.646387    | 3.53533967  | 2.93964259  | 2.63662357  | 360   | 252   |
| 55805     | NM_018409                             | LRP2BP       | LRP2 binding protein                 | 1.288113981   | -1.76687706  | 0.182266   | 0.232341    | 0.095545    | 0.93882015  | 1.12560759  | 0.60191771  | 21    | 62    |
| 83879     | NM_031942.NM_145810                   | CDC47        | cell division cycle associated 7     | 1.63552539    | -1.767004894 | 35.210758  | 11.566745   | 5.82800183  | 6.52788076  | 5.0259897   | 3.961       | 4788  | 1525  |
| 55269     | NM_012347.NM_033480.NM_033480         | PFAS         | F-box protein 9                      | -1.063240226  | -1.767479226 | 0.951266   | 5.568842    | 5.568842    | 5.5204734   | 4.80760921  | 4.80760921  | 241   | 2355  |
| 5198      | NM_0012393                            | PFAS         | phosphoribosylformylglycinamid       | -1.036758887  | -1.76750759  | 7.552419   | 7.291727    | 0.414429    | 5.29289816  | 5.29289816  | 4.54889714  | 1554  | 1082  |
| 55269     | NM_010306657.NM_020779                | NR2          | WD repeat domain 35                  | -1.293164359  | -1.767671984 | 1.820451   | 3.851989    | 4.498147    | 4.32923034  | 4.87683384  | 3.55423929  | 746   | 1209  |
| 4882      | NM_003995                             | NP2          | natutretic peptide receptor 2        | 1.00359299    | -1.76813461  | 5.105349   | 5.592736    | 2.711117    | 4.17517665  | 4.29742051  | 3.4128543   | 670   | 979   |
| 8669      | NM_001284335.NM_001284336             | E1F3F3       | eukaryotic translation initiation fa | 1.0340893     | -1.768503494 | 54.351595  | 56.320295   | 28.920798   | 7.08824005  | 7.13625222  | 6.27318286  | 5303  | 7327  |
| 26469     | NM_001142370.NM_0014369               | PTPN18       | protein tyrosine phosphatase, no     | -1.590153951  | -1.768529532 | 20.137047  | 13.652714   | 10.835999   | 6.17833593  | 5.52084648  | 5.37097154  | 2804  | 2356  |
| 339005    | NR_003521                             | WHAMMP3      | WAS protein homolog associat         | -1.250896074  | -1.76856235  | 2.460164   | 1.709613    | 0.307996    | 3.26442151  | 2.97854475  | 2.55254608  | 338   | 361   |
| 79064     | NM_001108051                          | TMEM223      | transmembrane protein 223            | 1.14742121    | -1.768837912 | 33.709694  | 38.725819   | 17.899397   | 4.99552244  | 5.18211693  | 4.20130594  | 1208  | 1852  |
| 6231      | NM_0101029                            | RPS26        | ribosomal protein S26                | -1.69985793   | -1.769171894 | 660.579971 | 389.074371  | 350.86554   | 8.78017212  | 8.01725968  | 7.36960968  | 17221 | 13339 |
| 145748    | NM_001105539.NM_001277145             | ZBTB10       | zinc finger and BTB domain con       | 1.0493717664  | -1.769195993 | 0.403982   | 0.424641    | 0.25354973  | 2.29940604  | 1.23554073  | 1.23554073  | 154   | 216   |
| 101928103 | NM_001284417.NM_001284418             | LYSDM4       | LysM domain containing 4             | 1.588459996   | -1.769291158 | 0.303044   | 4.843066    | 1.616948    | 3.18583679  | 3.79367035  | 2.47942639  | 318   | 675   |
| 6035      | NR_110292                             | LOC101928103 | uncharacterized LOC101928103         | 1.58038602    | -1.770669481 | 0.299471   | 0.476871    | 0.159157    | 0.73313634  | 1.03456085  | 0.45708734  | 26    | 55    |
| 6035      | NM_002933.NM_198232.NM_19RNASE1       | RNASE1       | ribonuclease A family member 1       | 2.98550528    | -1.770699481 | 8.615336   | 24.81512    | 0.436644    | 0.73313634  | 1.57857014  | 0.45708734  | 26    | 104   |
| 65989     | NM_0011144936                         | C12orf25     | chromosome 11 open reading fra       | 1.53921645    | -1.771297283 | 15.392746  | 7.781293    | 8.082222    | 4.12245573  | 4.33720745  | 2.81951699  | 816   | 1265  |
| 51251     | NM_00102009.NM_001002010              | NT5C3A       | 5'-nucleotidase, cytosolic 11A       | -1.43075918   | -1.771310276 | 59.383691  | 41.962336   | 31.860733   | 6.10439259  | 6.10439259  | 5.8893797   | 4055  | 3763  |
| 79922     | NM_024864                             | MRM1         | mitochondrial rRNA methyltransf      | -1.068887835  | -1.772358032 | 11.180222  | 10.472344   | 5.925124    | 4.39021014  | 4.29881852  | 3.61657686  | 784   | 980   |
| 79728     | NM_024675                             | PALB2        | partner and localizer of BRCA2       | -1.118234737  | -1.772455601 | 13.493269  | 12.084267   | 7.152605    | 5.76384974  | 5.60575399  | 4.95840765  | 2094  | 2502  |
| 5718      | NM_001316341.NM_0                     |              |                                      |               |              |            |             |             |             |             |             |       |       |

|           |                                        |            |                                    |              |              |             |             |             |             |            |            |       |       |     |
|-----------|----------------------------------------|------------|------------------------------------|--------------|--------------|-------------|-------------|-------------|-------------|------------|------------|-------|-------|-----|
| 105378992 | NR_146624                              | LINC02057  | long intergenic non-protein codin  | -4.252339746 | -1.78653192  | 2.588192    | 0.584664    | 1.39514558  | 0.46599441  | 0.93448595 | 64         | 20    | 44    |     |
| 54919     | NM_017802.NR_075098                    | DNAF5      | dynein axonemal assembly factor    | -1.235729807 | -1.786634989 | 20.478539   | 20.478539   | 6.40988621  | 6.10851071  | 5.58588904 | 3299       | 3767  | 2271  |     |
| 80695     | NM_030768                              | ILKAP      | ILK associated senenly factor      | 1.145269722  | -1.786638711 | 31.174522   | 35.477383   | 5.48575866  | 5.87736765  | 5.48754624 | 13720      | 2632  | 1184  |     |
| 440173    | NR_027471                              | LOC044173  | uncharacterized LOC040173          | 1.645004637  | -1.787235724 | 1.815169    | 3.084415    | 0.952215    | 2.19894236  | 1.58918566 | 141        | 310   | 97    |     |
| 23187     | NM_001144758.NM_001144759.PHLDB1       |            | pleckstrin homology like domain 1  | -1.872027418 | -1.787355297 | 8.274021    | 4.427463    | 5.45257769  | 4.5763457   | 4.64038721 | 1680       | 1199  | 1156  |     |
| 89876     | NM_001320316.NM_001320317.MAATS1       |            | MYCBP associated and testis ex     | 1.602430506  | -1.787433733 | 1.199646    | 1.935148    | 2.63728034  | 3.22787299  | 1.97058519 | 205        | 439   | 499   |     |
| 10346     | NM_001199573.NM_006074                 | TRIM22     | tripartite motif containing 22     | -1.94226808  | -1.787933558 | 7.724504    | 3.982126    | 4.057356    | 3.69731229  | 3.69719192 | 913        | 628   | 628   |     |
| 26577     | NM_013363                              | PCOLCE2    | procollagen C-endopeptidase en     | 1.878423345  | -1.788034021 | 4.289866    | 8.054943    | 3.24517298  | 4.08048581  | 2.52166171 | 333        | 835   | 229   |     |
| 5775      | NM_0022630                             | PTPNK      | protein tyrosine phosphatase, no   | 1.030227082  | 3.73109195   | 3.721059    | 3.73109195  | 5.40358932  | 5.40358932  | 4.58793254 | 16119      | 2168  | 1113  |     |
| 201456    | NM_001142958.NM_152676                 | FBXO15     | F-box protein 15                   | -1.135381739 | -1.789082685 | 1.595719    | 0.664518    | 0.398977    | 1.2010231   | 1.10017532 | 51         | 60    | 35    |     |
| 81030     | NM_001160417.NM_00160418.ZBP1          |            | Z-DNA binding protein 1            | -2.343110192 | 0.890679     | 0.890679    | 0.219283    | 0.310452    | 0.63490936  | 0.78645063 | 51         | 29    | 35    |     |
| 391356    | NM_001013663                           | PTRHD1     | peptidyl-HRNA hydrolase domain     | -1.09608666  | -1.789199979 | 37.57412    | 34.331673   | 19.722895   | 4.45531083  | 4.32923711 | 822        | 1002  | 565   |     |
| 128439    | NR_003239                              | SNHG11     | small nucleolar RNA host gene 1    | 1.114099146  | -1.78926881  | 14.574632   | 16.480074   | 4.05651939  | 4.20351422  | 3.28382219 | 614        | 914   | 422   |     |
| 11103     | NM_007043                              | KRR1       | KRR1, small subunit processome     | -1.213737548 | -1.789529149 | 36.78289    | 29.513229   | 6.88219462  | 6.60534266  | 6.05221098 | 4502       | 5055  | 3156  |     |
| 266042    | NR_024361.NR_024362.NR_024363          | FAM86B3P   | family with sequence similarity 8/ | 1.521171678  | -1.789560337 | 16.04533    | 24.385522   | 5.10110034  | 3.72674411  | 3.72674411 | 860        | 1748  | 591   |     |
| 56658     | NM_001253.NM_172016                    | TRIM3      | tripartite motif containing 39     | -1.294553295 | -1.789907076 | 4.806543    | 3.798938    | 2.521256    | 3.79565219  | 3.38725759 | 655        | 676   | 450   |     |
| 29992     | NM_013439.NM_178272.NM_17PILRA         |            | paired immunoglobulin like type 2  | -2.039683279 | -1.790170265 | 6.885358    | 2.728539    | 3.0281061   | 2.17238371  | 2.32103228 | 281        | 184   | 193   |     |
| 2230      | NM_004109                              | FDX1       | ferredoxin 1                       | -1.277642946 | -1.790175721 | 10.329047   | 8.093008    | 5.421712    | 5.03285024  | 4.69151638 | 1246       | 1303  | 856   |     |
| 84948     | NM_032862                              | TIGD5      | tigger transposable element deriv  | 1.201976502  | -1.790240478 | 4.294061    | 5.164644    | 3.47073972  | 3.71417485  | 2.72964665 | 396        | 636   | 272   |     |
| 728402    | NR_027338                              | TPH1P3     | triophosphate isomerase 1 pse      | 1.238698966  | 0.062231     | 0.068635    | 0.030865    | 0.10623215  | 0.13134883  | 0.0585501  | 3          | 5     | 2     |     |
| 692224    | NR_003136                              | FBXO22-AS1 | FBXO22 antisense RNA 1             | -1.002019576 | -1.790408566 | 0.116791    | 0.139492    | 0.089792    | 0.10601836  | 0.0585501  | 3          | 4     | 2     |     |
| 574444    | NR_001066                              | MIR491     | microRNA 491                       | -1.937182024 | -1.790408566 | 0.749315    | 0.251836    | 0.245023    | 0.10623215  | 0.05398282 | 3          | 2     | 2     |     |
| 693196    | NR_030342                              | MIR611     | microRNA 611                       | -1.937182024 | -1.790408566 | 0.971198    | 0.482084    | 0.473362    | 0.10623215  | 0.05398282 | 3          | 2     | 2     |     |
| 103032261 | NR_0013731                             | MIR1910    | microRNA 1910                      | -1.720640609 | -1.790408566 | 0.786781    | 1.569585    | 0.383438    | 0.10623215  | 0.18071335 | 3          | 7     | 2     |     |
| 100422945 | NR_036220                              | MIR4326    | microRNA 4326                      | -1.320831011 | 0.106333     | 0.782881    | 0.466247    | 0.10623215  | 0.08023518  | 0.0585501  | 3          | 3     | 2     |     |
| 100847041 | NR_049633.NR_049633_dup1               | MIR3680-2  | microRNA 3680-2                    | -1.937182024 | -1.790408566 | 0.657977    | 0.373483    | 0.316191    | 0.10623215  | 0.0585501  | 3          | 2     | 2     |     |
| 10245432  | NR_106781                              | MIR8723    | microRNA 8723                      | -1.937182024 | -1.790408566 | 0.881841    | 0.381601    | 0.262389    | 0.10623215  | 0.05398282 | 3          | 2     | 2     |     |
| 102454565 | NR_106834                              | MIR6776    | microRNA 6776                      | -1.002019576 | -1.790408566 | 0.101319    | 0.603774    | 0.10623215  | 0.10601836  | 0.0585501  | 3          | 4     | 2     |     |
| 644936    | NR_004845                              | LOC644936  | actin beta pseudogene              | -1.320831011 | -1.790408566 | 0.049197    | 0.038576    | 0.01519     | 0.10623215  | 0.08023518 | 3          | 3     | 2     |     |
| 100151683 | NR_023343                              | RNU4ATAC   | RNA, U4atac small nuclear (U12     | 1.720640609  | -1.790408566 | 0.416428    | 0.925591    | 0.255752    | 0.10623215  | 0.18071335 | 3          | 7     | 2     |     |
| 100847026 | NR_049803                              | MIR5006    | microRNA 5006                      | -1.937182024 | -1.790408566 | 0.678895    | 0.811165    | 0.347519    | 0.10623215  | 0.05398282 | 3          | 2     | 2     |     |
| 109623463 | NR_145839                              | SNORA117   | small nucleolar RNA, H1ACA box     | -3.532026599 | -1.790408566 | 0.436994    | 0.159429    | 0.34939     | 0.10623215  | 0.0585501  | 3          | 1     | 3     |     |
| 115557    | NM_001111270.NM_001347933.NM_001347935 |            | Rho guanine nucleotide exchang     | 1.727079442  | 0.869728     | 0.869728    | 0.790779442 | 3.14203175  | 3.14203175  | 3.14203175 | 185        | 185   | 127   |     |
| 1510      | NM_001317331.NM_001910.NMCTSE          |            | cathepsin E                        | 1.805702851  | -1.791382238 | 0.817442    | 1.484121    | 0.423477    | 1.47662927  | 2.07783221 | 70         | 169   | 48    |     |
| 136895    | NM_138811                              | C7orf31    | chromosome 7 open reading fra      | 1.271922851  | -1.791382238 | 0.503738    | 0.642755    | 0.265626    | 1.47662927  | 1.70865125 | 70         | 119   | 48    |     |
| 4697      | NM_002489                              | NDUFA4     | NDUFA4, mitochondrial complex      | -1.846612336 | -1.792136056 | 40.64032    | 32.553421   | 31.483648   | 6.92273916  | 6.09402133 | 4724       | 3418  | 3242  |     |
| 54205     | NM_018947                              | CYCS       | cytochrome c, somatic              | -1.392726801 | -1.792200581 | 49.970879   | 35.919918   | 8.0792653   | 7.60344091  | 7.24174078 | 10759      | 10149 | 7260  |     |
| 5637      | NM_001258338.NM_018838                 | NDUFA12    | NDUFA12,ubiquinone oxidoreductas   | -1.448531128 | -1.792230708 | 145.827454  | 100.8335468 | 5.94803691  | 5.94803691  | 5.94743558 | 3221       | 2971  | 272   |     |
| 507       | NM_001185                              | AZGP1      | alpha-2-glycoprotein 1, zinc-bi    | -9.765944642 | -1.792555    | 14.214707   | 1.143062    | 7.446338    | 4.21133328  | 3.4259826  | 688        | 94    | 472   |     |
| 348       | NM_000041.NM_001302688.NMAPOE          |            | apolipoprotein E                   | -2.376117234 | -1.792619886 | 2.016268    | 2.500071    | 2.75626978  | 2.75626978  | 1.77444288 | 226        | 127   | 155   |     |
| 6169      | NM_000999.NM_001035258                 | RPL38      | ribosomal protein L38              | -1.627902891 | -1.792746283 | 1920.795823 | 1180.626823 | 1006.742172 | 9.50642391  | 8.80465085 | 28515      | 23404 | 19563 |     |
| 51406     | NM_001317724.NM_016167                 | NOL7       | nuclear protein 7                  | -1.318891475 | -1.792920333 | 37.919231   | 28.792143   | 5.98766551  | 5.81632194  | 5.59555204 | 2452       | 2484  | 1682  |     |
| 64288     | NM_001135204.NM_001135216.ZSCAN31      |            | zinc finger and SCAN domain co     | 1.046378265  | -1.793562    | 1.040786    | 1.109928    | 0.491602    | 1.95552917  | 1.34055686 | 108        | 150   | 74    |     |
| 28371     | NM_001042371                           | PHF1       | phosphoglycolate phosphatase       | 1.015538607  | -1.793728671 | 19.253407   | 1.99372867  | 5.56380781  | 5.804870781 | 5.03871225 | 321        | 321   | 261   |     |
| 144363    | NM_001001660                           | ETFRF1     | electron transfer flavoprotein rag | -1.213875225 | -1.793623811 | 6.043013    | 6.043013    | 3.831309    | 3.18583679  | 2.46326383 | 138        | 351   | 218   |     |
| 10124     | NM_001037164.NM_001195396.ARL4A        |            | ADP ribosylation factor like GTPi  | -1.34834157  | -1.794208225 | 5.552939    | 4.120678    | 2.904245    | 4.15055879  | 3.74731998 | 658        | 652   | 451   |     |
| 80314     | NM_001272004.NM_001272019.EPC1         |            | enhancer of polycomb homolog 1     | -1.066080024 | -1.794487345 | 13.202929   | 12.941713   | 7.266287    | 5.30794575  | 4.49294082 | 1516       | 1900  | 1039  |     |
| 9324      | NM_001201362.NM_001201363.HMGN3        |            | high mobility group nucleosomal    | -1.12860555  | -1.79468636  | 45.575781   | 37.776047   | 22.626694   | 5.48985314  | 5.19193145 | 172        | 1685  | 1182  |     |
| 28370     | NM_182653                              | BRICD5     | BRICD5 domain containing 5         | -1.11168778  | -1.794866823 | 9.163519    | 8.256396    | 4.792876    | 3.35339667  | 3.21608274 | 362        | 435   | 248   |     |
| 257236    | NR_001163867.NM_014407.NM_014407       | PLSCL3     | potassium calcium-activated cha    | -1.256817376 | -1.795330845 | 4.142271    | 5.591716    | 4.898015    | 3.75992862  | 3.29855565 | 619        | 618   | 558   |     |
| 10056     | NM_153376                              | CDCD96     | colled-coil domain containing 96   | 1.230652931  | -1.795488327 | 0.915903    | 1.133624    | 0.48019     | 1.55375576  | 1.75827411 | 76         | 125   | 52    |     |
| 112597    | NM_005687.NR_130154                    | FARS8      | phenylalanyl-tRNA synthetase bi    | 1.071179587  | -1.795803135 | 43.765382   | 47.069761   | 22.80804    | 6.86849681  | 5.93593936 | 4246       | 6077  | 2908  |     |
| 57234     | NR_024204.NR_024205.NR_024206          | CYTOR      | cytoskeleton regulator RNA         | 1.1043508    | -1.795960555 | 65.870595   | 76.031347   | 36.145257   | 5.2482889   | 5.38791554 | 4.43334413 | 1453  | 2144  | 995 |
| 102466734 | NR_111950.NR_111951.NR_111952          | LINC00869  | long intergenic non-protein codin  | 6.809709021  | -1.796582425 | 0.468162    | 2.352432    | 0.148337    | 0.64188297  | 0.39027104 | 22         | 201   | 15    |     |
| 103625681 | NR_106841                              | MIR8783    | microRNA 8783                      | 1.088208278  | -1.796582425 | 8.899853    | 8.60067     | 4.67238     | 0.64188297  | 0.68708806 | 0.39027104 | 22    | 32    | 15  |
| 105379194 | NR_134244.NR_134245                    | RPB13      | ribosomal protein L13 (head to     | 1.920730369  | -1.796862425 | 1.920730369 | 1.920730369 | 0.505307    | 0.94891425  | 0.38402669 | 0.39027104 | 22    | 16    | 16  |
| 84916     | NM_001318391.NM_003230                 | UTP4       | UTP4, small subunit processome     | 1.305306879  | -1.79779659  | 55.360801   | 72.137969   | 28.912558   | 6.93209801  | 7.51372863 | 4755       | 8293  | 3253  |     |
| 993       | NM_001789.NM_201567                    | CDC25A     | cell division cycle 25A            | -1.072954204 | -1.79875558  | 7.449903    | 6.951017    | 3.927216    | 4.8026342   | 4.7042325  | 1056       | 1315  | 722   |     |
| 7390      | NM_000375.NM_001320436.NMUROS          |            | uroporphyrinogen III synthase      | 1.10808659   | -1.798964329 | 10.886957   | 12.204746   | 5.56269     | 4.00480921  | 3.22751932 | 591        | 875   | 404   |     |
| 26770     | NR_003939                              | SNORD79    | small nucleolar RNA, C/D box 79    | 1.010382062  | -1.799367627 | 96.842453   | 97.92424    | 50.357918   | 3.12125378  | 2.39140598 | 300        | 405   | 205   |     |
| 103625681 | NR_125724                              | LPLH1-AS1  | LPLH1 antisense RNA 1              | -1.020642497 | -1.801250708 | 1.82894     | 1.801250708 | 0.946822    | 0.946822    | 0.946822   | 28123      | 20619 | 19107 |     |
| 26804     | NR_002748                              | SNORD45B   | small nucleolar RNA, C/D box 45    | -1.13020704  | -1.8060635   | 15.880635   | 14.306913   | 8.337038    | 1.08460011  | 0.69713258 | 40         | 52    | 30    |     |
| 10049467  | NR_036488.NR_137280.NR_131.LINC00673   |            | long intergenic non-protein codin  | 1.365379439  | -1.800266586 | 12.756119   | 17.537402   | 6.649633    | 4.90008261  | 5.33643196 | 1133       | 2067  | 774   |     |
| 56947     | NM_001277061.NM_001277062.MFF          |            | mitochondrial fission factor       | -1.033928057 | -1.801031076 | 40.621003   | 39.787144   | 22.518095   | 6.19776714  | 5.41154759 | 2939       | 3798  | 2007  |     |
| 9409      | NM_004813.NM_057174                    | PEX16      | peroxisomal biogenesis factor 16   | -1.46036804  | -1.801458716 | 13.68526    | 9.381881    | 4.72495781  | 4.20351422  | 3.91874377 | 99         | 914   | 612   |     |
| 57088     | NM_001128304.NM_001128305.PLSGR4       |            | phospholipid scramblase 4          | -1.073326394 | -1.801809277 | 1.457722    | 1.375929    | 2.55837852  | 2.47408961  | 1.89255394 | 192        | 239   | 131   |     |
| 6207      | NM_001017                              | RPS13      | ribosomal protein S13              | -1.822379916 | -1.801810682 | 1390.75125  | 763.996155  | 9.86848103  | 8.62230581  | 6.83864071 | 28123      | 20619 | 19107 |     |
| 90736     | NM_001166699.NM_001166700.FAM104B      |            | family with sequence similarity 1/ | -1.38433348  | -            |             |             |             |             |            |            |       |       |     |

|           |                                   |              |                                      |              |              |            |            |            |             |             |            |       |       |       |
|-----------|-----------------------------------|--------------|--------------------------------------|--------------|--------------|------------|------------|------------|-------------|-------------|------------|-------|-------|-------|
| 101929767 | NR_110868                         | LOC101929767 | uncharacterized LOC101929767         | 1.098423684  | -1.81428209  | 1.474144   | 5.10935    | 2.397067   | 2.05603457  | 2.16012918  | 1.45359569 | 124   | 182   | 84    |
| 9904      | NM_001146698.NM_001146699.RBM19   |              | RNA binding molf protein 19          | 1.108140089  | -1.81487678  | 1.4759341  | 19.546705  | 8.805459   | 6.16917354  | 6.31536245  | 5.32550055 | 2786  | 4125  | 1888  |
| 102724594 | NM_001320546.NM_001320648.U2AF1L5 |              | U2 small nuclear RNA auxiliary li    | 1.011057007  | -1.814957224 | 72.355427  | 73.29089   | 37.35549   | 6.14185247  | 6.15749387  | 5.29842508 | 2733  | 3692  | 1852  |
| 51710     | NM_001164276.NM_012694            | ZNF44        | zinc finger protein 44               | -1.241267167 | -1.815139567 | 6.012307   | 5.603831   | 3.601627   | 4.2485404   | 3.95487459  | 3.44888601 | 707   | 761   | 473   |
| 55646     | NM_001145725.NM_017816            | LYAR         | Ly1 antibody reactive                | -1.102128923 | -1.816311773 | 62.633316  | 56.881298  | 32.402107  | 6.59422814  | 6.45545516  | 5.74531961 | 3754  | 4551  | 2542  |
| 100874211 | NR_046706                         | MID1P1-AS1   | MID1P1 antisense RNA 1               | 2.346034781  | -1.816747779 | 0.216596   | 0.114591   | 0.253432   | 0.114591    | 0.253432    | 0.44594451 | 6     | 19    | 4     |
| 100874211 | NR_033900.NR_033901               | F11-AS1      | F11 antisense RNA 1                  | 1.97837507   | -1.816747779 | 0.080305   | 0.161311   | 0.080305   | 0.033184    | 0.20517559  | 0.38406669 | 6     | 16    | 4     |
| 692108    | NR_030363                         | SNORD67      | small nucleolar RNA, C/D box 67      | -1.586572806 | -1.816747779 | 1.183103   | 0.730843   | 0.577665   | 0.20517559  | 0.20517559  | 0.13134883 | 6     | 5     | 4     |
| 9363      | NM_004794                         | RAB33A       | RAB33A, member RAS oncogen           | -3.807641871 | -1.816747779 | 0.141685   | 0.035382   | 0.056412   | 0.20517559  | 0.20517559  | 0.05380692 | 6     | 6     | 4     |
| 84229     | NM_001289162.NM_001289163.DRC7    |              | dyxyn regulatory complex subun       | -1.002055038 | -1.816747779 | 0.050997   | 0.051433   | 0.050997   | 0.20517559  | 0.20517559  | 0.20477631 | 6     | 8     | 4     |
| 677766    | NR_030323                         | SCARNA2      | small Cajal body-specific RNA 2      | -1.328298723 | -1.816747779 | 0.34968    | 0.280023   | 0.189422   | 0.20517559  | 0.20517559  | 0.15624221 | 6     | 6     | 4     |
| 100124536 | NR_003706                         | SNORA38B     | small nucleolar RNA, H/ACA box       | 1.120502413  | -1.816747779 | 1.002731   | 1.320301   | 0.487263   | 0.20517559  | 0.20517559  | 0.2284445  | 6     | 9     | 4     |
| 101928453 | NR_120638                         | LOC101928453 | uncharacterized LOC101928453         | 2.223481544  | -1.816747779 | 0.12454    | 0.325782   | 0.074958   | 0.20517559  | 0.20517559  | 0.42561204 | 6     | 18    | 4     |
| 653427    | NM_001126334                      | FOXO4L5      | forkhead box D4-like 5               | 2.591141254  | -1.816747779 | 0.044376   | 0.127798   | 0.021093   | 0.20517559  | 0.20517559  | 0.48576948 | 6     | 21    | 4     |
| 28966     | NM_014037                         | SLC6A16      | solute carrier family 6 member 1f    | 1.120502413  | -1.816747779 | 0.045357   | 0.057185   | 0.024963   | 0.20517559  | 0.20517559  | 0.228445   | 6     | 9     | 4     |
| 100302174 | NR_031707                         | MIR1307      | microRNA 1307                        | -2.596168628 | -1.816747779 | 0.942116   | 0.346894   | 0.46494    | 0.20517559  | 0.20517559  | 0.08023518 | 6     | 3     | 4     |
| 26783     | NR_002449                         | SNORA65      | small nucleolar RNA, H/ACA box       | -1.200456015 | -1.816932492 | 13.61011   | 11.376245  | 7.034309   | 1.48977343  | 1.32539385  | 0.99569924 | 71    | 79    | 48    |
| 84879     | NM_001136493.NM_001287808.MFS2A   |              | major facilitator superfamily dom    | -1.091959865 | -1.81718538  | 2.063323   | 1.913473   | 1.034861   | 2.41415945  | 2.31185141  | 1.75709337 | 170   | 208   | 115   |
| 55615     | NM_001017528.NM_001017529.PRR5    |              | proline rich 5                       | -1.205092799 | -1.817801469 | 3.350535   | 2.616411   | 1.731657   | 2.83562844  | 2.60642858  | 2.1294865  | 241   | 267   | 163   |
| 283417    | NM_173812                         | DPY19L2      | dpy-19 like 2                        | -1.353732548 | -1.818048233 | 0.474764   | 0.350586   | 0.242203   | 1.5285023   | 1.2579953   | 1.02536867 | 74    | 73    | 50    |
| 10102     | NM_001172695.NM_001172696.TSPM    |              | Ts translation elongation factor, r  | -1.161012325 | -1.818208101 | 21.350648  | 18.416646  | 11.648002  | 5.1947445   | 5.20913369  | 4.58420075 | 1641  | 1888  | 1110  |
| 219855    | NM_001145290.NM_198277            | SLC37A2      | solute carrier family 37 member 2    | 3.817607476  | -1.818368348 | 9.503303   | 36.089714  | 4.918319   | 3.50680931  | 7.21166504  | 4.47289912 | 1514  | 1723  | 1024  |
| 93164     | NR_002774                         | HTRP7P1      | 5-hydroxytryptamine receptor 7 p     | -1.115402607 | -1.818986129 | 1.078936   | 0.97281    | 0.559352   | 2.94960548  | 2.36620557  | 1.8266989  | 182   | 218   | 123   |
| 5202      | NM_012394                         | PFND2        | prefoldin subunit 2                  | -1.66581698  | -1.819683303 | 216.341125 | 130.028915 | 111.713951 | 7.09012918  | 6.36091297  | 6.23507035 | 5310  | 4259  | 3589  |
| 3945      | NM_0011714097.NM_001315537.LDHB   |              | lactate dehydrogenase B              | -1.09059632  | -1.820825811 | 580.12146  | 543.884085 | 298.06166  | 9.57191062  | 9.44700035  | 8.70878637 | 29841 | 36560 | 20157 |
| 54944     | NR_120386                         | LINC01521    | long intergenic non-protein codin    | -1.26485867  | -1.821001608 | 1.903229   | 1.506567   | 0.980261   | 3.19389071  | 2.99897101  | 2.45238731 | 320   | 338   | 216   |
| 723162    | NR_146578.NR_146578_p2            | PCAT2        | zinc finger protein 539 pseudoge     | -4.625734719 | -1.82126007  | 1.940448   | 6.62216007 | 1.98791    | 4.45271307  | 5.01985022  | 4.46984502 | 849   | 1048  | 681   |
| 26548     | NM_001303277.NM_012278            | ITGB1BP2     | integrin subunit beta 1 binding pr   | -1.477149087 | -1.822291425 | 4.216918   | 2.162898   | 2.162898   | 2.66071453  | 2.20527523  | 1.97058519 | 320   | 189   | 141   |
| 107001062 | NR_134500                         | LOC107001062 | uncharacterized LOC107001062         | -1.97996496  | -1.822829396 | 2.112396   | 1.061561   | 1.081697   | 1.16889611  | 0.70406985  | 0.75138414 | 49    | 33    | 33    |
| 26771     | NR_002574                         | SNORD102     | small nucleolar RNA, C/D box 10      | -1.310075969 | -1.824085792 | 18.771938  | 14.32654   | 9.598325   | 1.21691895  | 1.00745609  | 0.78645063 | 52    | 53    | 35    |
| 805       | NM_001305624.NM_001305625.CALM2   |              | calmodulin 2                         | -2.513766501 | -1.824243925 | 449.795372 | 187.350272 | 253.270931 | 9.62075703  | 8.29367011  | 8.75496369 | 30870 | 16408 | 20813 |
| 64080     | NR_103851.NR_103852               | TAT-AS1      | TAT antisense RNA 1                  | -1.33085818  | -1.825921995 | 0.297777   | 0.251124   | 0.163465   | 0.29776659  | 0.29776659  | 0.2284445  | 9     | 9     | 6     |
| 100372493 | NR_136535                         | LOC100372493 | uncharacterized LOC100372493         | -1.091806307 | -1.825921995 | 1.147640   | 0.535907   | 0.29776659 | 0.29776659  | 0.27450903  | 0.16897038 | 9     | 11    | 6     |
| 135656    | NM_080870                         | DPCCR1       | diffuse panbronchiolitis critical re | -1.980810008 | -1.825921995 | 0.039593   | 0.022249   | 0.022576   | 0.29776659  | 0.15624221  | 0.16897038 | 9     | 6     | 6     |
| 406896    | NR_029519                         | MIR103A2     | microRNA 103a-2                      | -1.494320211 | -1.825921995 | 2.77619    | 1.836252   | 1.301597   | 0.29776659  | 0.20477631  | 0.16897038 | 9     | 8     | 6     |
| 51154     | NM_016183                         | MRT04        | MRT4 tRNA-matur, ribosome matur      | 1.122466282  | -1.826074737 | 46.424484  | 52.172646  | 23.890486  | 6.69697378  | 6.86212776  | 5.83963686 | 4034  | 6050  | 2717  |
| 51686     | NM_001134939.NM_001301371.OA23    |              | ornithine decarboxylase antizym      | -1.019635394 | -1.826213362 | 1.708899   | 1.676015   | 0.921326   | 1.29208824  | 0.85412573  | 0.85412573 | 78    | 76    | 39    |
| 10212     | NM_005804.NR_046366               | DOX39A       | DEX-D-box helicase 39A               | -1.199496263 | -1.826244228 | 123.42777  | 103.10561  | 63.590038  | 7.33695799  | 7.27607402  | 6.67446428 | 7252  | 8078  | 4884  |
| 93016     | NM_013834                         | MTA1         | mitochondrial ribosomal protein as   | -1.04178617  | -1.826375623 | 1.116123   | 16.809473  | 8.288285   | 4.78193895  | 4.78193895  | 3.89484066 | 925   | 986   | 1385  |
| 10795     | NM_001165881.NM_001165882.ZNF268  |              | zinc finger protein 268              | -1.200331986 | -1.826711894 | 5.030895   | 4.230264   | 2.601484   | 4.87650783  | 4.62285328  | 4.04718786 | 1040  | 1240  | 750   |
| 84182     | NM_032222                         | MINDY4       | MINDY lysine 48 deubiquitinase-      | 1.201900136  | -1.827254539 | 1.575934   | 1.895413   | 0.805445   | 2.37926962  | 2.597368    | 1.72191206 | 165   | 265   | 111   |
| 439949    | NR_036502.NR_036503               | PRKCQ-AS1    | PRKCQ antisense RNA 1                | -1.271490055 | -1.827273194 | 2.532542   | 2.006154   | 1.309156   | 2.70647097  | 2.41858604  | 2.00847214 | 217   | 228   | 146   |
| 57162     | NM_020651                         | PELI1        | pellino E3 ubiquitin protein ligase  | 1.051047941  | -1.827517142 | 7.365192   | 7.751373   | 7.85071    | 4.80863452  | 4.87796738  | 3.98061446 | 1061  | 1490  | 714   |
| 100532731 | NM_001204062                      | COMMD3-BM11  | COMMD3-BM11 readthrough              | -1.396870349 | -1.827765293 | 1.222888   | 1.520974   | 0.087549   | 3.0008215   | 2.58825601  | 2.27238811 | 275   | 263   | 185   |
| 54109     | NM_011444.NR_023360.NR_0403RAC1   |              | fibronectin type III domain 1.6      | -1.241810379 | -1.827931754 | 144.897603 | 114.778545 | 738.919260 | 10.51926904 | 10.51926904 | 9.91623158 | 5740  | 6185  | 3843  |
| 340393    | NM_001252402.NM_001252404.TMEM249 |              | transmembrane protein 249            | -1.42418831  | -1.82794637  | 1.36207    | 0.76176    | 0.733556   | 1.30514558  | 1.10017522  | 0.91876801 | 64    | 60    | 43    |
| 57291     | NR_024031.NR_145129.NR_141DANCRC  |              | differentiation antagonizing non-j   | -1.02689819  | -1.828268767 | 45.648491  | 44.627994  | 23.505098  | 5.38735072  | 5.34998195  | 4.54506286 | 1604  | 2079  | 1079  |
| 343990    | NM_207362                         | KIAA1211L    | KIAA1211 like                        | -1.015631032 | -1.828396685 | 4.559674   | 4.498297   | 2.344135   | 4.18531139  | 4.16417063  | 3.37879258 | 675   | 888   | 494   |
| 140739    | NM_0011278305.NM_001278306.UBE2F  |              | ubiquitin conjugating enzyme E2      | 1.393732404  | -1.828431949 | 13.988518  | 19.524196  | 7.188727   | 4.95205502  | 5.41781761  | 4.11944434 | 219   | 210   | 151   |
| 643253    | NR_003710                         | CTC1P1       | chaperonin containing TCP1 sub       | -1.810362378 | -1.828481149 | 8.580524   | 4.740314   | 4.410807   | 3.3947037   | 3.19521507  | 3.18215673 | 580   | 428   | 390   |
| 54109     | NM_001044.NM_023360.NR_0403RAC1   |              | chromatin accessibility comp         | -1.09870886  | -1.82849763  | 23.019152  | 11.10725   | 6.5847075  | 5.89340099  | 5.89340099  | 4.97655154 | 2189  | 2654  | 1472  |
| 57130     | NM_020410                         | ATP13A1      | ATPase 13A1                          | -1.235853752 | -1.829438723 | 31.709883  | 26.68899   | 16.288425  | 6.91057282  | 6.60788264  | 6.04055586 | 4684  | 5064  | 3149  |
| 84897     | NM_032811.NR_016021               | TBRG1        | transforming growth factor beta n    | -2.174772467 | -1.829889241 | 12.947455  | 5.940855   | 6.63613    | 6.02086843  | 4.92580232  | 5.57136207 | 2510  | 1542  | 1687  |
| 9136      | NM_004704                         | RRP9         | ribosomal RNA processing 9, sm       | 1.12287224   | -1.830263263 | 27.06073   | 30.419794  | 13.891718  | 5.4160359   | 5.57953754  | 4.57169125 | 1637  | 2456  | 1100  |
| 6546      | NM_001112800.NM_001112801.SLC8A1  |              | solute carrier family 8 member A     | 1.49247703   | -1.830586827 | 0.050254   | 0.073877   | 0.025597   | 0.38477185  | 0.54351856  | 0.22116494 | 12    | 24    | 8     |
| 100507642 | NR_108054.NR_109065               | LOC100507642 | uncharacterized LOC100507642         | -1.08916424  | -1.830586827 | 0.526076   | 0.268316   | 0.38477185 | 0.38477185  | 0.22307784  | 0.22116494 | 12    | 70    | 7     |
| 105374454 | NR_146505                         | LOC105374454 | uncharacterized LOC105374454         | 2.543387241  | -1.830586827 | 0.109692   | 0.0596316  | 0.0596316  | 0.38477185  | 0.38477185  | 0.83317479 | 12    | 41    | 8     |
| 2191      | NM_001291807.NM_004460            | FAP          | fibroblast activation protein alpha  | 3.223387965  | -1.830586827 | 0.111524   | 0.357448   | 0.056876   | 0.38477185  | 0.99371033  | 0.22116494 | 12    | 52    | 8     |
| 64137     | NM_001124505.NM_001348191.ABCG4   |              | ATP binding cassette subfamily C     | -2.264662914 | -1.830586827 | 0.035412   | 0.041645   | 0.041645   | 0.38477185  | 0.18071335  | 0.22116494 | 12    | 7     | 8     |
| 3846      | NM_005553                         | KRTAP5-9     | keratin associated protein 5-9       | -1.143779286 | -1.830586827 | 0.264255   | 0.225278   | 0.134289   | 0.38477185  | 0.3412894   | 0.22116494 | 12    | 14    | 8     |
| 677763    | NR_003000                         | SCARNA21     | small Cajal body-specific RNA 21     | -1.769274832 | -1.830586827 | 1.247427   | 1.107113   | 0.107113   | 0.38477185  | 0.2284445   | 0.22116494 | 12    | 8     | 8     |
| 100271715 | NM_001145451                      | ARHGAPF33    | Rho guanine nucleotide exchang       | 1.121637544  | -1.830586827 | 0.072399   | 0.081744   | 0.081744   | 0.38477185  | 0.42651204  | 0.22116494 | 12    | 16    | 8     |
| 83558     | NM_001317238.NM_031921            | ATAD3B       | ATPase family, AAA domain co         | 1.020002987  | -1.832171569 | 41.108775  | 42.168145  | 21.157     |             |             |            |       |       |       |

|           |                            |              |                                     |              |              |            |              |             |             |             |             |       |       |       |
|-----------|----------------------------|--------------|-------------------------------------|--------------|--------------|------------|--------------|-------------|-------------|-------------|-------------|-------|-------|-------|
| 116092    | NM_025951                  | DNTT1P1      | deoxynucleotidyltransferase term    | 1.0202084459 | -1.841026205 | 77.944565  | 93.811424    | 39.784409   | 6.62805818  | 6.89114901  | 5.75972846  | 3844  | 6174  | 2568  |
| 105374105 | NR_146710                  | LINC02014    | long intergenic non-protein codin   | 1.0651340591 | -1.841277842 | 1.006012   | 1.752027     | 0.541749    | 1.15225689  | 1.59489542  | 0.7332601   | 48    | 106   | 32    |
| 79629     | NM_001300800.NM_024771     | NAAD         | N(Alpha)-acetyltransferase 40, N    | 1.167300739  | -1.841530648 | 19.744676  | 23.101913    | 10.048226   | 6.16712953  | 6.36743716  | 5.30297309  | 2782  | 4339  | 1858  |
| 144715    | NM_001286531.NM_001286532  | RAD9         | RAD9 checkpoint clamp compon        | 1.10485034   | -1.84213136  | 0.580839   | 0.642713     | 0.306162    | 1.38110603  | 1.47139626  | 0.90287895  | 63    | 93    | 42    |
| 65220     | NM_001198993.NM_00118994   | NADK         | NAD kinase                          | -1.123117745 | -1.842359988 | 29.909735  | 26.084698    | 15.212521   | 6.57006607  | 6.40442001  | 5.70120895  | 3691  | 4391  | 2464  |
| 25946     | NM_001130697.NM_001130968  | ZNF385A      | zinc finger protein 385A            | 1.020101748  | -1.842596463 | 5.538167   | 5.422221     | 2.669116    | 3.71136013  | 3.73910482  | 2.91931156  | 475   | 648   | 317   |
| 114327    | NM_001172420.NM_0018100.NR | EFHC1        | EF-hand domain containing 1         | -1.099184805 | -1.842812643 | 3.754477   | 3.416523     | 1.930641    | 4.67692288  | 4.54605682  | 3.84165053  | 965   | 1173  | 644   |
| 51619     | NM_0015983                 | UBE2D4       | ubiquitin conjugating enzyme E2     | -2.214534233 | -1.842953067 | 3.688762   | 1.064799     | 1.878369    | 3.93685111  | 2.89986118  | 3.13191707  | 562   | 339   | 375   |
| 6890      | NM_001320755.NM_003170     | SUPT7BH      | SP176 homolog, histone chaperon     | 1.115432524  | -1.843241318 | 50.687026  | 50.687026    | 6.1610023   | 8.1610023   | 8.31860081  | 7.28299521  | 11168 | 16689 | 7472  |
| 5766      | NM_001142641               | BRIN1        | bricrin like 1                      | 1.361027651  | -1.84411135  | 21.367231  | 15.714947    | 1.8441135   | 10.8871590  | 6.13969094  | 5.70865102  | 3940  | 1949  | 247   |
| 51166     | NM_001286682.NM_001286683  | AADAT        | aminoadipate aminotransferase       | 1.050396562  | -1.844444514 | 4.401668   | 4.576315     | 2.169962    | 3.42014445  | 3.48529134  | 2.64620047  | 381   | 535   | 254   |
| 100506211 | NR_038262                  | MIR210HG     | MIR210 host gene                    | 4.12499498   | -1.844461869 | 4.498309   | 18.577225    | 2.282981    | 3.47073972  | 5.41330708  | 2.69315937  | 396   | 2183  | 264   |
| 2653      | NM_004483.NR_033249        | GCSH         | glycine cleavage system protein i   | -1.319745185 | -1.845146908 | 52.220206  | 39.61324     | 26.22505    | 3.67154031  | 5.91058637  | 5.43659878  | 3065  | 3103  | 2043  |
| 284581    | NR_040807                  | LOC284581    | uncharacterized LOC284581           | -1.616498505 | -1.845615909 | 10.577735  | 6.548954     | 5.386161    | 4.79281331  | 4.31359073  | 3.95194263  | 1049  | 867   | 699   |
| 500623    | BKDRB2                     |              | bradykinin receptor E2              | -1.22449854  | -1.846525873 | 2.870406   | 2.348553     | 1.459612    | 3.67154031  | 3.40449323  | 2.8792681   | 461   | 503   | 307   |
| 26778     | NR_000011                  | SNORA70      | small nuclear RNA, H/ACA box        | -1.203773928 | -1.847491486 | 125.077179 | 104.020126   | 63.642686   | 4.12551355  | 3.87464915  | 3.30815729  | 609   | 430   | 400   |
| 51734     | NM_016332                  | MSRB1        | methionine sulfoxide reductase E    | -1.151056941 | -1.847927169 | 15.755175  | 13.704021    | 8.001846    | 4.49496323  | 4.30161051  | 3.66213029  | 846   | 982   | 563   |
| 23363     | NM_001173408.NM_001173431  | OBSL1        | obscurin like 1                     | 2.076015083  | -1.848052992 | 9.997344   | 19.683363    | 5.149054    | 5.20710155  | 6.24058837  | 4.35374951  | 1411  | 3914  | 939   |
| 283152    | NM_001145018               | CDC153       | coiled-coil domain containing 153   | -1.544933195 | -1.847459931 | 3.417448   | 2.56022      | 2.66628     | 2.30685184  | 1.82964782  | 1.64757178  | 155   | 134   | 103   |
| 84978     | NM_001286490.NM_001286491  | FRMD5        | FERM domain containing 5            | -1.189345471 | -1.849861166 | 5.644732   | 4.996985     | 2.97816     | 4.84104841  | 4.60035389  | 3.99567625  | 1086  | 1220  | 722   |
| 200916    | NM_001099645.NM_001320451  | RL2L1        | ribosomal protein L22 like 1        | 1.57029029   | -1.850208133 | 24.493288  | 38.747065    | 12.405369   | 5.61509368  | 6.2554245   | 4.7521471   | 1885  | 3955  | 1253  |
| 641710    | NM_0528183.NM_052814       | CARD9        | cardiac recruitment domain fam      | 1.136202843  | -1.850372285 | 1.676434   | 1.919546     | 0.85439     | 2.16656821  | 2.31185141  | 1.52834454  | 137   | 208   | 91    |
| 8190      | NM_001202553.NM_006533     | MIA          | melanoma inhibitory activity        | -10.29482695 | -1.850422551 | 22.167815  | 2.23297      | 11.037096   | 3.70009475  | 1.11294744  | 2.90342651  | 471   | 61    | 313   |
| 23214     | NM_001270940.NM_0015171    | XP06         | exportin 6                          | 1.003121802  | -1.85062305  | 48.755532  | 48.958944    | 24.487256   | 7.74465462  | 7.74913054  | 6.86233784  | 8381  | 11233 | 5570  |
| 9104      | NM_001282848.NM_001282849  | RGN          | regucalcin                          | -1.017759127 | -1.852848201 | 2.440953   | 2.383872     | 1.696447    | 2.67229041  | 2.65089709  | 1.96321628  | 211   | 277   | 140   |
| 6157      | NM_000990                  | RPL27A       | ribosomal protein L27a              | -1.872196718 | -1.853253711 | 39.848236  | 192.419342   | 182.4646    | 10.7401109  | 9.83610296  | 9.85017692  | 47895 | 9607  | 44439 |
| 26472     | NM_001009186.NM_00101762   | TCBP1        | chaperon containing 1 regulatory    | -1.292276021 | -1.853439174 | 182.097621 | 141.07319474 | 1.853439174 | 8.88651827  | 8.51588112  | 7.91588112  | 1949  | 247   | 247   |
| 54332     | NM_001040875.NM_0018972.NR | GDAP1        | protein phosphatase 1 subfamily     | -1.036822047 | -1.853686096 | 226.341537 | 226.341537   | 118.834167  | 7.79924488  | 6.93689955  | 6.33689955  | 8844  | 11397 | 5868  |
| 79925     | NM_001040875.NM_0018972.NR | GDAP1        | ganglioside induced differentiation | -1.116445643 | -1.853946331 | 7.658356   | 6.726804     | 3.818299    | 4.88689241  | 4.71579131  | 4.01982118  | 1108  | 1326  | 735   |
| 101928841 | NM_024867.NM_144722        | SPEF2        | sperm flagellar 2                   | -1.020401813 | -1.854170891 | 1.230767   | 1.33362      | 0.741769    | 2.48807034  | 2.46415559  | 1.80120704  | 181   | 237   | 120   |
| 105374366 | NR_001304433               | LOC101928841 | collagen alpha1-(I) chain-like      | 4.289446005  | -1.856458087 | 0.178603   | 0.776046     | 0.090086    | 1.40904982  | 1.30198204  | 0.91876801  | 65    | 373   | 43    |
| 105374366 | NR_134664.NR_134665        | LINC02482    | long intergenic non-protein codin   | -1.021704116 | -1.856458087 | 3.602345   | 3.505698     | 1.786197    | 1.40904982  | 1.38976355  | 0.91876801  | 65    | 85    | 43    |
| 84298     | NM_033238                  | ADORA3       | adenosine G protein-coupled 3       | 1.16549371   | -1.85649371  | 12.654033  | 12.654033    | 1.95097523  | 6.94727407  | 6.94727407  | 6.94727407  | 609   | 646   | 374   |
| 22874     | NM_033238                  | LLPH         | LLP homolog, long-term synaptic     | -1.29374407  | -1.857413255 | 34.784149  | 26.919472    | 17.59277    | 5.40046018  | 5.03887932  | 4.53607637  | 1619  | 1672  | 1072  |
| 55691     | NM_014935                  | PLEKHA6      | pleckstrin homology domain cont     | -1.773985365 | -1.857606852 | 20.067907  | 11.323816    | 10.151589   | 7.18863495  | 6.36925428  | 6.30362097  | 5688  | 4284  | 376   |
| 7036      | NM_001318336.NM_001318337  | FRMD4A       | FERM domain containing 4A           | 1.756116     | -1.858109404 | 1.756116   | 2.001988     | 0.895275    | 3.72253824  | 3.8951276   | 2.91931156  | 472   | 728   | 317   |
| 105374366 | NM_001206855.NM_003227     | TRF2         | transferin receptor 2               | -2.292159072 | -1.858497627 | 1.733054   | 0.780187     | 0.8783      | 2.55837852  | 1.67459501  | 1.06002215  | 119   | 115   | 127   |
| 105374366 | NM_00125628                | CCTA8        | transmembrane protein 285           | -1.551276325 | -1.859155896 | 32.736235  | 20.8145896   | 16.31148932 | 5.06599532  | 5.06599532  | 5.06599532  | 2591  | 1714  | 2231  |
| 84128     | NM_001303096.NM_032168     | WDR75        | WD repeat domain 75                 | -1.049741953 | -1.859258771 | 53.878113  | 51.378666    | 27.230038   | 7.15525285  | 7.0857201   | 6.26917183  | 5557  | 7073  | 3676  |
| 87178     | NM_033109                  | PNP1T        | polynucleotide nucleotidyltr        | -1.094264977 | -1.859619059 | 23.580042  | 21.571699    | 11.912275   | 6.7402377   | 6.61154362  | 5.85675157  | 4158  | 5077  | 2750  |
| 105369340 | NR_135086.NR_135087        | LOC105369340 | uncharacterized LOC105369340        | 1.17111369   | -1.859721447 | 12.861726  | 15.161715    | 6.510824    | 2.852529613 | 3.0232078   | 2.09493548  | 239   | 374   | 185   |
| 6728      | NM_001204193.NM_001204194  | SRP19        | signal recognition particle 19      | -1.141614239 | -1.85968822  | 52.560566  | 50.856882    | 30.368279   | 6.45958416  | 6.27082215  | 5.57840516  | 3416  | 3998  | 2259  |
| 100507032 | NR_037893                  | TMCC1-AS1    | TMCC1 antisense RNA 1 (head 1       | 1.55647924   | -1.859921337 | 0.834472   | 1.305639     | 0.418614    | 1.94589385  | 2.44070794  | 1.34055686  | 112   | 233   | 74    |
| 105374366 | NR_121674.NM_015345        | CCTA8        | ERICH8 antisense RNA 1              | 1.077578024  | -1.860945741 | 1.069173   | 1.077578024  | 1.955199134 | 1.077578024 | 1.077578024 | 1.077578024 | 50    | 72    | 33    |
| 55683     | NM_001193537.NM_001193538  | TMEM126B     | transmembrane protein 126B          | -1.476542638 | -1.860313159 | 44.447147  | 33.116041    | 33.116041   | 6.15841002  | 5.60008828  | 5.28008828  | 2765  | 2502  | 1828  |
| 100132815 | NR_103741.NR_103742        | IPOS1        | importin 5 pseudogene 1             | 1.692178813  | -1.862714915 | 1.711823   | 2.891557     | 0.860228    | 3.316643    | 4.03087288  | 2.55254608  | 356   | 805   | 235   |
| 400798    | NR_033186                  | C1orf220     | chromosome 1 open reading fra       | 1.406959983  | -1.86313759  | 6.434263   | 4.567675     | 2.301722    | 3.63946355  | 4.09825806  | 2.83807727  | 450   | 846   | 297   |
| 619595    | NR_002585                  | SNORA52      | small nuclear RNA, H/ACA box        | -1.057208301 | -1.863417595 | 17.741111  | 16.751316    | 8.837725    | 1.73025716  | 1.64759501  | 1.16514558  | 60    | 115   | 60    |
| 92340     | NM_001164257.NM_001191029  | PRR29        | proline rich 29                     | -1.090540275 | -1.863480763 | 1.604447   | 1.471111     | 0.80752     | 2.55212659  | 2.4491251   | 1.85174813  | 191   | 234   | 126   |
| 8594      | NM_000817.NM_015345        | PEX3         | glutamate decarboxylase 1           | 1.2875401    | -1.86334729  | 1.2875401  | 1.86334729   | 5.42204794  | 5.06747294  | 5.06747294  | 5.06747294  | 1664  | 1964  | 1064  |
| 2550      | NM_001319053.NM_001470.NM  | GABBR1       | gamma-aminobutyric acid type B      | -1.100524841 | -1.864004896 | 7.638688   | 6.940226     | 3.847911    | 5.10081829  | 4.96683492  | 4.32818553  | 1308  | 1588  | 863   |
| 7294      | NM_003328                  | TXK          | TXK tyrosine kinase                 | 1.063040452  | -1.864054517 | 0.781134   | 0.834397     | 0.395549    | 1.69664266  | 1.75827411  | 1.13825079  | 88    | 125   | 58    |
| 79469     | NR_002771                  | DLEU2L       | deleted in lymphocytic leukemia :   | -1.408727989 | -1.864732157 | 0.584794   | 0.415324     | 0.296318    | 0.97665845  | 0.75384785  | 0.60191771  | 38    | 36    | 25    |
| 5325      | NM_001080951.NM_001080952  | PLAGL1       | PLAG1 like zinc finger 1            | 1.165996268  | -1.864739627 | 3.619591   | 3.572623     | 3.5292011   | 3.7329126   | 3.7329126   | 2.73414401  | 414   | 645   | 273   |
| 1788      | NM_001320892.NM_001320893  | DNMT3A       | DNA methyltransferase 3 alpha       | 1.10359639   | -1.86510527  | 8.352784   | 10.069618    | 4.591234    | 5.13049438  | 5.26884622  | 4.26640425  | 1336  | 1970  | 891   |
| 89978     | NM_001303096.NM_032168     | WDR75        | peroxisomal biogenesis factor 3     | 1.16549371   | -1.865185184 | 6.425571   | 7.521853     | 3.23314     | 4.11186458  | 3.36435937  | 3.36435937  | 681   | 1054  | 505   |
| 79869     | NM_001136040.NM_001142565  | PCSF7        | cleavage and polyadenylation sp     | 1.137791971  | -1.865488502 | 59.914554  | 26.487242    | 7.72007669  | 7.72007669  | 6.84192505  | 6.47411008  | 4774  | 11008 | 4774  |
| 80301     | NM_001195059.NM_002501     | PLEKH02      | pleckstrin homology domain cont     | -1.442000783 | -1.865661333 | 6.915289   | 4.808217     | 3.465904    | 4.69831216  | 4.19452969  | 3.84581243  | 980   | 908   | 646   |
| 339487    | NM_001308135.NM_001308136  | ZBTB80S      | zinc finger and BTB domain cont     | -1.202301271 | -1.865966736 | 25.870999  | 21.097521    | 12.563773   | 5.06613802  | 4.80900168  | 4.20292915  | 1276  | 1418  | 818   |
| 283663    | NR_024433                  | LINC00926    | long intergenic non-protein codin   | -1.197835133 | -1.866204947 | 1.272709   | 0.63892      | 0.639011    | 2.04717061  | 1.36863803  | 1.42086173  | 123   | 83    | 81    |
| 353324    | NM_001320755.NM_003921     | BCL2L1       | B-cell CLL lymphoma 10              | 1.461423027  | -1.866173623 | 8.162305   | 12.793242    | 3.395455    | 4.917547592 | 4.917547592 | 4.917547592 | 1036  | 1036  | 1036  |
| 1244      | NM_018127                  | SPTA112      | spermatogenesis associated 12       | -1.937358509 | -1.868464513 | 0.530316   | 0.178553     | 0.172479    | 0.86602952  | 0.50527     |             |       |       |       |

|           |                                    |                                    |              |              |            |              |            |             |            |             |       |       |       |
|-----------|------------------------------------|------------------------------------|--------------|--------------|------------|--------------|------------|-------------|------------|-------------|-------|-------|-------|
| 79897     | NM_001199120.NM_001199121.RPP21    | ribonuclease PMRP subunit p21      | -1.315456781 | -1.886099184 | 44.656712  | 34.050834    | 22.344649  | 4.66538426  | 4.28759625 | 3.79937556  | 957   | 972   | 624   |
| 91624     | NM_001172309.NM_144573 NEXN        | nexilin F-actin binding protein    | -2.707499887 | -1.886917734 | 0.482811   | 0.17827      | 0.238898   | 1.38110603  | 0.609904   | 0.88680889  | 63    | 31    | 41    |
| 95940     | NM_001143628.NM_001160166.HRRH4    | histamine receptor H4              | -3.199331815 | -1.889659505 | 0.115565   | 0.032064     | 0.059003   | 0.5190475   | 0.19071335 | 0.29607837  | 17    | 7     | 11    |
| 284029    | NR_020891 NUC_020891               | long intergenic non-protein codin  | -1.411591317 | -1.889565905 | 0.1041028  | 0.144213     | 0.104717   | 0.5190475   | 0.38406669 | 0.29607837  | 17    | 16    | 11    |
| 103625684 | NR_125730.chr1.NR_125730.cRNUG-2   | RNA, U6 small nuclear 2            | -1.50941608  | -1.889656905 | 3.98797    | 2.687762     | 2.023844   | 0.5190475   | 0.36283659 | 0.29607837  | 17    | 15    | 11    |
| 3704      | NM_001267623.NM_001324236.ITPA     | inosine triphosphatase             | 1.260094632  | -1.889801741 | 52.572986  | 66.282881    | 26.874398  | 5.94177327  | 6.27046593 | 5.04421398  | 2374  | 3997  | 1545  |
| 79173     | NM_001345643.NM_001345844.C19orf57 | chromosome 19 open reading fr      | 1.466286     | -1.890157637 | 1.621254   | 0.712156     | 2.36507395 | 1.67590018  | 2.39263351 | 1.67590018  | 163   | 223   | 106   |
| 79366     | NM_0030763 HMGCS5                  | high mobility group nucleosome I   | -1.235051924 | -1.890235524 | 6.609344   | 5.357338     | 3.284167   | 3.8780834   | 3.59633059 | 3.044408938 | 538   | 582   | 350   |
| 9405      | NM_004862.NM_016377.NM_1345AF4     | A-kinase anchoring protein 7       | -1.602691405 | -1.890381383 | 1.630588   | 0.981566     | 0.808145   | 2.50111114  | 1.26862893 | 1.79240867  | 147   | 113   | 147   |
| 15140     | NM_016510 SCLY                     | selenocysteine lyase               | -1.13010879  | -1.890871686 | 7.255518   | 4.205238     | 4.1453771  | 4.2355958   | 4.1453771  | 3.55435928  | 798   | 936   | 519   |
| 8301      | NM_01008660.NM_001206946.PICALM    | phosphatidylinositol binding clath | -1.162618059 | -1.891385504 | 50.297781  | 42.852716    | 24.535438  | 7.62037333  | 7.40418356 | 6.70742979  | 7686  | 8833  | 4998  |
| 344887    | NR_033752 NMRAL2P                  | NmrA like redox sensor 2, pseud    | -1.017898921 | -1.891420211 | 2.888651   | 2.845581     | 1.434481   | 2.83047153  | 2.80838262 | 2.08088     | 240   | 315   | 156   |
| 677798    | NR_020952 SNORA9                   | small nuclear RNA, H/ACA box       | -1.008629291 | -1.891641397 | 15.054467  | 14.919003    | 7.419153   | 1.56621863  | 1.02535867 | 1.55800914  | 77    | 102   | 50    |
| 5170      | NM_001261816.NM_002613.NMPDPK1     | 3-phosphoinositide dependent pr    | -1.064888639 | -1.891868694 | 12.860585  | 12.089898    | 6.387868   | 6.51898908  | 6.42920612 | 5.61300252  | 3561  | 4468  | 2315  |
| 26074     | NM_001318917.NM_014161.NR.MRP.L18  | mitochondrial ribosomal protein L  | -1.563851407 | -1.892209548 | 82.742378  | 52.828434    | 41.086558  | 5.6784421   | 5.67844022 | 5.40944022  | 3083  | 2634  | 2004  |
| 51367     | NM_015918.NM_198202 POP5           | POP5 homolog, ribonuclease P/B     | -1.253753317 | -1.89230013  | 51.792105  | 41.339693    | 26.056532  | 5.3418659   | 5.02458641 | 4.45257508  | 1553  | 1059  | 1008  |
| 117854    | NM_001003818.NM_001198644.TRIM6    | tripartite motif containing 6      | -1.374297125 | -1.893583254 | 0.567691   | 0.410497     | 0.294171   | 1.5285023   | 1.24644988 | 0.99599624  | 74    | 72    | 48    |
| 54753     | NM_0017560 ZNF853                  | zinc finger protein 853            | 1.253929099  | -1.895198265 | 0.246426   | 0.311996     | 0.122846   | 0.8996265   | 1.06116576 | 0.54161868  | 34    | 52    | 118   |
| 389362    | NM_001128591.NM_001128592.PSMG4    | proteasome assembly chaperone      | -1.121761179 | -1.896110186 | 24.722059  | 22.379731    | 12.589563  | 4.43676607  | 4.27912189 | 3.57205238  | 811   | 966   | 526   |
| 25989     | NM_001099436.NM_001284304.ULK3     | unc-51 like kinase 3               | -1.270620103 | -1.898998912 | 37.548451  | 29.819164    | 18.825379  | 6.68058429  | 6.34881611 | 5.77781179  | 4016  | 4223  | 2801  |
| 101929140 | NR_120423 LOC101929140             | uncharacterized LOC101929140       | -2.638770474 | 0.186884     | 0.061223   | 0.092616     | 0.43999062 | 0.18071335  | 0.24657076 | 0.24657076  | 14    | 7     | 9     |
| 102465330 | NR_106941 MIR6881                  | microRNA 6881                      | -1.167092162 | -1.899452158 | 4.65559    | 3.990889     | 2.240737   | 0.43999062  | 0.38406669 | 0.24657076  | 14    | 16    | 9     |
| 254128    | NR_037856.NR_037857.NR_03/NIFK-AS1 | NIFK antisense RNA 1               | 0.10169765   | -1.899681303 | 2.458914   | 2.505513     | 1.207969   | 2.41415945  | 2.43393638 | 1.71282633  | 170   | 231   | 110   |
| 29081     | NM_001293186.NM_001293187.METTL5   | methyltransferase like 5           | -1.129208047 | -1.900027646 | 99.740198  | 88.819188    | 49.470306  | 6.42749724  | 6.25434409 | 5.51644411  | 3340  | 3952  | 2162  |
| 8741      | NM_001198622.NM_001198623.TNFSF13  | TNF superfamily member 13          | -1.494454458 | -1.900142613 | 6.33979    | 4.399944     | 3.29471    | 3.36765473  | 3.05850609 | 2.77545473  | 547   | 489   | 354   |
| 51582     | NM_001301688.NM_015878.MAZZIN1     | antizyme inhibitor 1               | -1.179291339 | -1.900749352 | 36.916314  | 31.733917    | 18.436955  | 7.2902369   | 7.0539908  | 6.37195038  | 6106  | 6918  | 3951  |
| 129521    | NM_001320417.NM_001320418.MAZZIN1  | microtubule interacting and traffi | -1.156047451 | -1.901863596 | 56.657489  | 47.684038    | 28.065493  | 5.54015052  | 4.86070025 | 4.35700025  | 2080  | 2404  | 1545  |
| 85463     | NM_003390 ZCCH12C                  | zinc finger CCHC-type containing   | -1.127069061 | -1.902351157 | 3.907128   | 3.283524     | 1.825926   | 4.86681307  | 4.60328502 | 4.14331116  | 1246  | 1476  | 805   |
| 6742      | NM_001256510.NM_001256511.SSBP1    | single stranded DNA binding pro    | -1.760904084 | -1.903681792 | 226.993651 | 128.197259   | 112.043724 | 7.40615172  | 6.59627524 | 6.48500342  | 6620  | 5023  | 4277  |
| 400508    | NR_026675 CRYM-AS1                 | CRYM antisense RNA 1               | -1.226390523 | -1.904220894 | 0.503749   | 0.408367     | 0.248153   | 0.95166931  | 0.67585857 | 0.55166931  | 45    | 49    | 29    |
| 91316     | NR_024448 GUSBP11                  | glucuronidase, beta pseudogene     | -1.170728132 | -1.905271806 | 10.368295  | 5.109835     | 12.152025  | 5.1492545   | 5.37073612 | 4.25549579  | 1354  | 2118  | 874   |
| 1302      | NM_001163771.NM_080679.NM.COL11A2  | collagen type XI alpha 2 chain     | 1.267963917  | -1.905310058 | 1.07804    | 1.548008     | 0.562756   | 2.9541672   | 3.25683293 | 2.18310266  | 265   | 446   | 171   |
| 9942      | NM_001349178.NM_001349179.KYLB     | polycystin 2, transient receptor p | 1.009071299  | -1.905691842 | 11.005591  | 9.076259     | 4.96071842 | 5.79193628  | 5.19631963 | 4.68070025  | 1763  | 2639  | 1384  |
| 4863      | NM_001321307.NM_002519 NPAT        | xylylkinase                        | 1.320514011  | -1.90577522  | 2.446176   | 3.047521     | 1.11804    | 3.15316384  | 3.51446439 | 2.36229074  | 310   | 547   | 200   |
| 100130705 | NM_001195150 LOC100130705          | nuclear protein, coactivator of h  | -1.457199631 | -1.9058432   | 8.319412   | 5.71476      | 4.099319   | 5.61808953  | 5.0882232  | 4.71395121  | 1889  | 1732  | 1219  |
| 400886    | NR_029481 MIRLET7D                 | microRNA let-7d                    | -1.03905115  | -1.906290035 | 0.189409   | 0.180722     | 0.092911   | 0.77668602  | 0.75384785 | 0.45078734  | 28    | 36    | 18    |
| 104959063 | NM_0011199864 BCL2L2-PA4BP1        | BCL2L2-PA4BP1 readthrough          | -1.17048071  | -1.90768019  | 3.307842   | 3.173091     | 3.190109   | 3.8380591   | 3.23816418 | 2.92861318  | 247   | 304   | 18    |
| 10452     | NM_001128916.NM_001128917.TOMM40   | translocase of outer mitochondr    | -1.146286811 | -1.907129471 | 113.651669 | 98.863224    | 56.942987  | 7.62391723  | 7.42801578 | 6.699115    | 7705  | 8981  | 4969  |
| 284001    | NM_001316321.NM_198082 CDCD57      | colled-coil domain containing 57   | -1.253591637 | -1.90730062  | 30.620709  | 24.450609    | 14.371769  | 7.14022264  | 6.81673931 | 6.21791319  | 5499  | 5861  | 3546  |
| 51503     | NM_016403 CWC15                    | CWC15 spliceosome associated       | -1.447990972 | -1.907336077 | 50.691204  | 34.329914    | 24.97349   | 6.29898489  | 5.74405535 | 5.38390874  | 3052  | 2759  | 1968  |
| 2329      | NM_020022 FMO4                     | flavin containing monooxygenase    | 1.400997202  | -1.907441605 | 0.237202   | 2.866299     | 0.999497   | 2.48150547  | 2.89227137 | 1.76650173  | 180   | 337   | 173   |
| 342357    | NM_001012981 ZKSCAN2               | zinc finger with KRAB and SCAN     | -1.141166765 | -1.90755059  | 2.725241   | 2.450073     | 1.341029   | 4.31651022  | 4.16870654 | 3.44889891  | 743   | 891   | 479   |
| 51681     | NM_001042574.NM_0022769 CRTC13     | CREB regulated transcription co    | -1.161675113 | -1.90873039  | 9.028733   | 5.159191     | 9.088239   | 5.55890913  | 4.86101798 | 4.36101798  | 265   | 304   | 180   |
| 51067     | NM_001004436 YARS2                 | tyrosyl-RNA synthetase 2           | -1.287403603 | -1.908902365 | 31.198746  | 24.25934     | 15.355289  | 6.06654372  | 5.70820636 | 5.15317881  | 2592  | 2690  | 1670  |
| 197342    | NM_001257370 EME2                  | essential meiotic structure-specif | 1.394702899  | -1.909525341 | 9.079649   | 12.676276    | 4.457866   | 3.91349545  | 2.65095518 | 2.65095518  | 396   | 738   | 255   |
| 64759     | NM_0022748 TNS3                    | tensin 3                           | -1.28686743  | -1.910052956 | 15.795881  | 12.288697    | 7.770275   | 6.88468457  | 6.52429973 | 5.96210866  | 4600  | 4776  | 2962  |
| 101928710 | NR_110848.NR_110849 LOC102081      | long intergenic non-protein cod    | -9.56510812  | -1.910337594 | 2.86901    | 0.279853     | 2.77786255 | 0.68708085  | 2.02324376 | 2.02324376  | 230   | 32    | 148   |
| 3145      | NM_000190.NM_001024382.NM.HMB5     | hydroxy methylbilane synthase      | -1.675655272 | -1.91067431  | 38.831705  | 17.226456    | 14.158023  | 5.4297412   | 4.52573709 | 4.06723709  | 1663  | 1318  | 1064  |
| 643854    | NM_001145659 CTAGE9                | infr finger protein 25             | 26.227453    | -1.910734869 | 26.227453  | 34.180734869 | 14.8646263 | 5.72546723  | 5.48762323 | 4.87623223  | 1658  | 1658  | 1068  |
| 5036      | NM_006191 PAZG4                    | CTAGE family member 9              | -1.634915485 | -1.911341761 | 3.324266   | 2.033107     | 1.629351   | 3.32266451  | 2.61003762 | 2.44243178  | 328   | 268   | 211   |
| 170961    | NM_133475 ANKRD24                  | proliferation-associated 2G4       | -1.325828979 | -1.911574888 | 10.86615   | 104.729256   | 9.09203063 | 8.68599471  | 8.1586699  | 7.5616699   | 21386 | 21552 | 13760 |
| 400410    | NM_001100879.NM_001100880.ST20     | ankyrin repeat domain 20           | -1.035062252 | -1.911983886 | 4.333589   | 4.190627     | 2.128521   | 4.16906145  | 4.12214544 | 3.30513776  | 667   | 861   | 429   |
| 441212    | NR_003500 RPPP                     | suppressor of tumorigenicity 20    | -1.680702804 | -1.912541916 | 18.294625  | 11.321152    | 9.197075   | 4.00480921  | 3.31058887 | 3.31058876  | 591   | 468   | 380   |
| 677831    | NR_002981 SNORA51                  | refinitis pigmentosa 9 pseudogen   | -1.99649831  | -1.913205549 | 12.078967  | 6.05317      | 5.55202    | 4.02303064  | 3.11177339 | 3.16503801  | 599   | 401   | 385   |
| 10196     | NM_001145166.NM_001145167.PRM1T3   | small nuclear RNA, H/ACA box       | 1.618757399  | -1.913481521 | 13.115984  | 6.475346     | 1.8546263  | 5.19234364  | 4.91878081 | 4.91878081  | 125   | 145   | 85    |
| 161823    | NM_001012969.NM_001159280.ADAL     | protein arginine methyltransferase | -1.328443194 | -1.913671236 | 28.200445  | 21.310911    | 6.859566   | 6.24912967  | 5.84559241 | 5.39592411  | 2947  | 2964  | 1894  |
| 131474    | NM_001012969.NM_001159280.ADAL     | adenosine deaminase like           | 1.23265322   | -1.914477772 | 2.932245   | 3.618408     | 1.349205   | 3.32800968  | 3.60313623 | 2.51644942  | 355   | 585   | 328   |
| 11226     | NM_00107210 GALTN16                | coiled-coil-helix-coiled-helix c   | -1.202693362 | -1.915334925 | 9.149319   | 7.444385     | 4.36714    | 3.81681978  | 3.57108823 | 2.96976228  | 514   | 571   | 230   |
| 114981    | NM_001318040.NM_001318041.PS15     | polypeptide N-acetylglucosidasi    | -1.796324622 | -1.915503659 | 4.376053   | 2.438397     | 2.147956   | 4.34210161  | 3.55246622 | 3.46789548  | 757   | 863   | 486   |
| 6209      | NM_001018158.NM_001308226.RPS15    | zinc finger protein 618            | -1.49892641  | -1.915598538 | 9.471114   | 3.307842     | 3.497114   | 4.962919587 | 4.5427231  | 4.09519587  | 176   | 227   | 136   |
| 26499     | NM_016445 PLEK2                    | ribosomal protein S15              | -1.341242725 | -1.915912451 | 995.773159 | 743.078292   | 488.401902 | 9.02561291  | 8.6028943  | 8.09010723  | 20442 | 20344 | 13110 |
| 112849    | NM_001331158.NM_001331159.L3HYDPH  | pleckstrin 2                       | -1.044315556 | -1.917417091 | 48.940662  | 46.915775    | 23.978197  | 6.22918489  | 6.16747684 | 5.30750681  | 2906  | 3718  | 1864  |
| 642799    | NM_001277324.NM_001277324.NP1A2    | trans-L-3-hydroxyproline dehydra   | -1.060007486 | -1.917708119 | 14.679637  | 14.016157    | 6.982844   | 5.36206908  | 4.54416182 | 4.53478801  | 1670  | 2105  | 1070  |
| 169792    | NM_001204364.NM_152644.NR.FAM24B   | nuclear pore complex interacting   |              |              |            |              |            |             |            |             |       |       |       |

|           |                                    |                                     |              |              |             |             |             |             |             |             |        |        |       |
|-----------|------------------------------------|-------------------------------------|--------------|--------------|-------------|-------------|-------------|-------------|-------------|-------------|--------|--------|-------|
| 4666      | NM_001113201.NM_001113202 NACA     | nascent polypeptide-associated c    | -1.467854666 | -1.931490822 | 834.228424  | 549.614082  | 387.659751  | 9.8745493   | 9.32155707  | 8.92626127  | 36815  | 33511  | 23443 |
| 2113      | NM_001143820.NM_001162422 ETS1     | ETS proto-oncogene 1, transcrip     | -1.50413943  | -1.93298958  | 18.545414   | 12.365213   | 9.504287    | 6.5758575   | 5.99450941  | 5.6390164   | 3706   | 3292   | 2358  |
| 4549      | NM_137294.NM_137294                | Homo sapiens mitochondrially er     | -1.352049823 | -1.933061385 | 3175.086182 | 2350.959055 | 1543.517212 | 11.52657101 | 11.09159438 | 10.57613848 | 115784 | 114420 | 73669 |
| 79238     | NM_001142350.NM_001347703 THOC6    | THO complex 6                       | 1.015169123  | -1.933510139 | 49.804229   | 52.091029   | 24.772731   | 6.10335385  | 6.12417812  | 5.17153303  | 2660   | 3608   | 1662  |
| 84847     | NR_038407                          | long intergenic non-protein codin   | -1.09189676  | -1.933625242 | 1.866576    | 1.714211    | 0.908224    | 1.66222564  | 1.57657016  | 1.08239698  | 85     | 104    | 54    |
| 105369807 | NR_146529                          | long intergenic non-protein codin   | -1.220266169 | -1.933754405 | 3.165501    | 2.587778    | 1.523955    | 1.5285023   | 1.34717796  | 0.9803768   | 74     | 81     | 47    |
| 6152      | NM_000986                          | ribosome protein L24                | 1.216623194  | -1.934322244 | 1176.887085 | 1433.458496 | 571.127276  | 9.333112409 | 9.615060927 | 8.3833709   | 25283  | 41099  | 16076 |
| 7517      | NM_001100118.NM_001100119 KRCC3    | X-ray repair cross complementin     | 1.340472976  | -1.934480859 | 21.796053   | 28.062889   | 10.441221   | 5.78469375  | 6.20078148  | 4.85689977  | 2125   | 3806   | 1351  |
| 158787    | NM_001031745.NM_001267053 RIBD1    | RIBD3A domain with coiled-coils     | 1.54486106   | -1.935215926 | 0.6541153   | 0.436665    | 1.54486106  | 1.12680759  | 0.61899593  | 0.47889593  | 30     | 62     | 19    |
| 84643     | NM_001256658.NM_001256659 TEAD2    | TEA domain transcription factor 2   | -8.476943333 | -1.935801667 | 1.352504    | 0.159131    | 0.645504    | 1.97422731  | 0.42561581  | 1.32870978  | 119    | 13     | 13    |
| 161835    | NM_001324338.NM_152597             | fibrous sheath interacting protein  | 1.68993034   | -1.936634899 | 0.17661     | 0.292418    | 0.073951    | 0.56944351  | 0.08637236  | 0.32020933  | 49     | 18     | 12    |
| 60677     | NM_001172684.NM_001172685 CELF6    | CUGBP Elav-like family member       | 1.454915361  | -1.936634899 | 0.14313     | 0.211485    | 0.068666    | 0.56944351  | 0.77006602  | 0.32020933  | 19     | 37     | 12    |
| 9         | NM_000662.NM_001160170.NM.NAT1     | N-acetyltransferase 1               | -1.392090075 | -1.937590144 | 5.684281    | 4.187577    | 2.775431    | 3.53555296  | 2.69315397  | 2.10815397  | 416    | 399    | 264   |
| 286027    | NM_001329678.NM_183241.NR.C3orf142 | chromosome 9 open reading fram      | -1.444321502 | -1.939089616 | 72.962243   | 50.933004   | 35.381096   | 5.8606208   | 5.34118895  | 4.92830565  | 2242   | 2074   | 1422  |
| 63439     | NM_031283                          | transcription factor 7 like 1       | 1.24726616   | -1.939604859 | 1.905121    | 2.381040    | 2.68377414  | 2.95745524  | 2.381040    | 1.92436744  | 213    | 355    | 135   |
| 1565      | NM_000106.NM_001025161             | cytochrome P450 family 2 subfar     | 1.056057511  | -1.939729785 | 1.430172    | 1.527819    | 0.70356     | 1.7191305   | 1.77442288  | 1.12461302  | 90     | 127    | 57    |
| 22832     | NM_001286206.NM_014895             | centrosome protein 162              | 1.056721167  | -1.940840767 | 1.78171     | 1.882105    | 0.86014     | 3.31698997  | 3.38881456  | 2.4901017   | 352    | 497    | 223   |
| 8604      | NM_0010755.NR_047549               | solute carrier family 25 member 1   | 1.080603305  | -1.941041005 | 9.821634    | 4.38647     | 1.57694504  | 5.29289816  | 5.29289816  | 4.2570592   | 1381   | 2004   | 875   |
| 9708      | NM_014004.NM_032088                | protocadherin gamma subfamily.      | -1.184729479 | -1.941920353 | 0.058741    | 0.048296    | 0.022922    | 0.26755841  | 0.2284445   | 0.14214747  | 8      | 9      | 5     |
| 5732      | NM_000956                          | prostaglandin E receptor 2          | -1.763306246 | -1.941920353 | 0.084146    | 0.047462    | 0.032265    | 0.26755841  | 0.15624221  | 0.14214747  | 8      | 6      | 5     |
| 359809    | NR_144431                          | paternally expressed 13             | 1.028713273  | -1.941920353 | 0.037049    | 0.038182    | 0.017573    | 0.26755841  | 0.27464693  | 0.14214747  | 8      | 11     | 5     |
| 93655     | NR_002332                          | ST7-OT3                             | -1.330220287 | -1.941920353 | 0.201304    | 0.139862    | 0.01867     | 0.26755841  | 0.20477631  | 0.14214747  | 8      | 8      | 5     |
| 100862692 | NR_046400                          | DIP2A-T11                           | 1.213351997  | -1.941920353 | 0.482692    | 0.573716    | 0.196465    | 0.26755841  | 0.31941552  | 0.14214747  | 8      | 13     | 5     |
| 102465539 | NR_106955                          | MIR6895                             | -1.184729479 | -1.941920353 | 2.669924    | 2.06765     | 1.195033    | 0.26755841  | 0.2284445   | 0.14214747  | 8      | 9      | 5     |
| 102465517 | NR_106917                          | MIR6858                             | -1.067926637 | -1.941920353 | 3.003888    | 2.893752    | 1.379418    | 0.26755841  | 0.25173066  | 0.14214747  | 8      | 10     | 5     |
| 606724    | NR_002454.NR_002454_dup1           | coronin 1A pseudogene               | 1.350671359  | -1.941920353 | 0.352697    | 0.456638    | 0.140023    | 0.26755841  | 0.3412894   | 0.14214747  | 8      | 14     | 5     |
| 102724064 | NR_135761                          | LOC102724064                        | 1.45495132   | -1.941920353 | 0.352138    | 0.45495132  | 0.142301    | 0.26755841  | 0.3412894   | 0.14214747  | 8      | 14     | 5     |
| 646024    | NR_002405                          | retinoic acid early transcript 1K p | -1.491247311 | -1.941955481 | 0.571866    | 0.344605    | 0.256114    | 0.97665845  | 0.72085408  | 0.58206975  | 38     | 34     | 24    |
| 317781    | NM_175066                          | DEAD-box helicase 51                | -1.321390484 | -1.94215461  | 14.94014    | 11.381338   | 7.227425    | 6.1214126   | 5.72598242  | 5.18309257  | 2694   | 2724   | 1706  |
| 51661     | NM_001135212.NM_181342             | FKBP7                               | 1.138517166  | -1.942870508 | 1.042891    | 1.197388    | 0.502326    | 1.9928118   | 2.13530335  | 1.34055586  | 174    | 178    | 74    |
| 7579      | NM_145238                          | zinc finger and SCAN domain co      | 1.14289803   | -1.943060392 | 1.888372    | 2.506166    | 0.910769    | 3.13236099  | 3.49751855  | 2.31203228  | 305    | 540    | 193   |
| 11910     | NM_006851                          | GLR1P1                              | 1.42067963   | -1.943038667 | 3.294863    | 4.635209    | 1.591992    | 4.2183652   | 2.89947726  | 2.32103228  | 493    | 824    | 312   |
| 51564     | NM_001098416.NM_001308090          | histone deacetylase 7               | -1.897200326 | -1.943153746 | 1.897200326 | 1.943153746 | 0.94369454  | 3.06949974  | 2.42910087  | 2.04203552  | 254    | 208    | 14    |
| 84277     | NM_032317                          | DNAJC30                             | -1.143859075 | -1.943274569 | 4.973049    | 4.357354    | 2.400694    | 3.37806534  | 3.55246622  | 2.87112187  | 482    | 563    | 305   |
| 84674     | NM_032587                          | CARD6                               | 1.492538392  | -1.943657341 | 1.785171    | 1.785171    | 0.569317    | 2.51403512  | 3.00619294  | 1.77525664  | 185    | 369    | 117   |
| 26816     | NR_000018                          | SNORD35A                            | -1.258670055 | -1.945137117 | 49.434147   | 39.302532   | 23.886505   | 2.36570395  | 2.10365798  | 1.64757178  | 163    | 173    | 103   |
| 32        | NM_001093                          | ACACB                               | -1.09381387  | -1.945292141 | 1.583138    | 1.448099    | 0.763445    | 3.9320442   | 3.81140968  | 3.05850609  | 560    | 684    | 354   |
| 10539516  | NR_108081                          | long intergenic non-protein codin   | -1.074093843 | -1.94545848  | 10.27814    | 6.94545848  | 5.0261924   | 3.06949974  | 2.42910087  | 2.04203552  | 254    | 208    | 14    |
| 84547     | NM_001184743.NM_032507             | pygmyBac transposable element c     | -1.045646041 | -1.946793136 | 2.862187    | 2.738911    | 1.370221    | 3.27963753  | 3.22198991  | 2.54238731  | 342    | 437    | 216   |
| 7726      | NM_001242783.NM_003449             | tripartite motif containing 26      | -1.273276214 | -1.948769445 | 13.29687    | 10.079142   | 6.282814    | 5.50449776  | 5.16458753  | 4.57169125  | 1743   | 1829   | 1100  |
| 26022     | NM_001033504.NM_001301746          | transmembrane protein 98            | -1.616969507 | -1.949190452 | 5.984295    | 0.930252    | 3.008931    | 3.57308778  | 1.43116693  | 2.72060965  | 428    | 89     | 270   |
| 728411    | NR_027026.NR_027027.NR_021GUSBP1   | glucuronidase, beta pseudogene      | 1.076525466  | -1.949577561 | 3.925944    | 3.83288     | 2.62541894  | 2.62541894  | 1.86820921  | 2.00100021  | 203    | 292    | 128   |
| 79027     | NM_001039958.NM_001009960          | zinc finger protein 655             | -1.736532373 | -1.949811967 | 12.038982   | 19.020354   | 5.162725    | 5.01136367  | 5.78852012  | 4.08992214  | 1227   | 1847   | 774   |
| 10040     | NM_001145860.NM_001145861          | PCP1 homolog                        | 1.432351169  | -1.949823326 | 6.91138     | 3.906233    | 3.23351914  | 5.23823536  | 4.19444823  | 3.51944454  | 1254   | 1914   | 1014  |
| 91298     | NM_001009894                       | chromosome 12 open reading fr       | -1.461034221 | -1.949959552 | 11.386718   | 7.977896    | 4.857177    | 5.03845181  | 4.51150549  | 4.11600233  | 1221   | 1144   | 789   |
| 283487    | NR_027701                          | long intergenic non-protein codin   | 1.045354492  | -1.950369992 | 1.522165    | 1.591573    | 0.732512    | 3.37481244  | 3.43277448  | 2.53718654  | 368    | 514    | 232   |
| 7965      | NM_001326606.NM_001326607          | AIMP2                               | -1.000410951 | -1.951010195 | 48.921174   | 23.583204   | 5.85428279  | 5.85370025  | 4.91351156  | 4.91351156  | 2232   | 2981   | 1407  |
| 256364    | NM_001300793.NM_001300794          | echinoid microtubule associat       | -1.066541515 | -1.951138509 | 23.760751   | 22.002522   | 11.255687   | 6.20284288  | 5.28008828  | 4.60008828  | 2900   | 3633   | 1828  |
| 27247     | NM_001002755.NM_001002756          | NUF1                                | -1.076933825 | -1.951338325 | 29.27214    | 1.951338325 | 14.980501   | 5.10188873  | 4.99815263  | 4.17673594  | 1399   | 1624   | 825   |
| 103908065 | NR_001039724.NM_00117161           | histone H4ac2 synthase related      | -1.115472326 | -1.951502416 | 3.15484846  | 3.27548026  | 1.75896627  | 2.85474387  | 2.18996627  | 1.75896627  | 273    | 327    | 172   |
| 26872     | NM_012449                          | STEAP1                              | -2.334779402 | -1.951510558 | 39.159061   | 16.789446   | 18.851942   | 5.67547924  | 4.48841131  | 4.73654166  | 1966   | 1125   | 1239  |
| 55759     | NM_018256                          | WD repeat domain 12                 | 1.0290963    | -1.951782507 | 33.470039   | 34.487347   | 16.116051   | 6.23602635  | 6.27686456  | 5.28925851  | 2920   | 4015   | 1840  |
| 8263      | NM_012151.NM_012151_dup1.F8A1      | coagulation factor VIII-associat    | 1.08767377   | -1.952512524 | 20.877901   | 22.736748   | 10.045473   | 5.5442263   | 5.27240856  | 4.22700707  | 1359   | 1975   | 856   |
| 79823     | NM_024766                          | CAMKMT1                             | -1.375147528 | -1.952832137 | 5.892054    | 4.294184    | 2.840266    | 3.31329794  | 2.90701332  | 2.47942639  | 351    | 341    | 221   |
| 63938     | NM_001031713                       | mitochondrial calcium importer n    | -1.252393047 | -1.953359783 | 5.794036    | 4.631845    | 2.787544    | 4.99417161  | 4.86063331  | 4.0704925   | 1212   | 1293   | 763   |
| 103908065 | NR_126505.NR_126505_dup1           | uncharacterized LOC103908065        | -1.26686445  | -1.953914191 | 1.139004    | 1.563801    | 0.68452986  | 0.94952986  | 0.68452986  | 0.68452986  | 43     | 42     | 26    |
| 348254    | NR_023380                          | colled-coil domain containing 144   | -1.42118123  | -1.954731755 | 0.007763    | 0.004784    | 0.049317359 | 0.36283659  | 0.27153692  | 0.27153692  | 16     | 15     | 10    |
| 100750225 | NR_045262                          | prostate cancer associated trans    | -1.01786271  | -1.954731755 | 0.20805     | 0.200895    | 0.100144    | 0.49317359  | 0.48576948  | 0.27153692  | 16     | 21     | 10    |
| 56971     | NM_001127893.NM_020219             | carcinoembryonic antigen relat      | -1.323105443 | -1.956945469 | 11.865234   | 8.978884    | 5.697153    | 4.75384679  | 4.36704658  | 3.83538509  | 1020   | 1030   | 641   |
| 137994    | NM_001199659.NM_001199660          | leucine zipper and EF-hand cont     | -1.268406513 | -1.957106633 | 5.588111    | 4.244024    | 2.770281    | 4.02526492  | 3.70787447  | 3.13871764  | 600    | 633    | 377   |
| 13842     | NM_001283034.NM_145269             | family with sequence similarity 9/  | -1.004418    | -1.957128772 | 0.002696    | 0.011616    | 0.090709    | 0.43845666  | 0.43845666  | 0.43845666  | 129    | 783    | 974   |
| 29121     | NR_004418                          | dual specificity phosphatase 2      | -1.423960035 | -1.957156435 | 1.002696    | 1.002696    | 0.5951229   | 2.09955541  | 1.72538257  | 1.72538257  | 129    | 121    | 81    |
| 101928099 | NM_001004419.NM_001197317          | C-type lectin domain family 2 me    | -1.742331506 | -1.957275399 | 7.539347    | 4.335653    | 6.366655    | 5.32179342  | 4.54723362  | 4.38697325  | 1531   | 1174   | 962   |
| 10632     | NR_121566.NR_121567.NR_12          | prostate cancer associated trans    | -1.204734964 | -1.957679154 | 0.815925    | 0.986746    | 0.380054    | 1.49109792  | 1.32354034  | 0.82068496  | 59     | 95     | 37    |
| 51135     | NM_006476.NR_033759                | ATP synthase, H+ transporting, r    | -2.589082189 | -1.957865277 | 149.029848  | 57.620262   | 71.579948   | 7.61044146  | 6.24965293  | 6.64819403  | 7633   | 3939   | 4795  |
| 84439     | NM_001114182.NM_001145256          | interleukin 1 receptor associat     | -1.5946832   |              |             |             |             |             |             |             |        |        |       |

|           |                                   |                                     |               |              |             |             |            |             |             |             |        |        |        |
|-----------|-----------------------------------|-------------------------------------|---------------|--------------|-------------|-------------|------------|-------------|-------------|-------------|--------|--------|--------|
| 339778    | NM_001105519.NM_00322426 C2orf70  | chromosome 2 open reading fram      | 1.37441822    | -1.972759688 | 1.242805    | 1.745907    | 0.567545   | 0.95786335  | 1.19932051  | 0.56199967  | 37     | 68     | 23     |
| 3452      | NM_001318163.NM_00318164 PUS7     | pseudouridylate synthase 7 (puta    | -2.0203573    | -1.973014377 | 10.621492   | 5.029497    | 5.029497   | 5.21898983  | 4.24326622  | 4.27586916  | 1423   | 941    | 887    |
| 5117      | NM_0191111                        | major histocompatibility complex,   | 1.164222104   | -1.973433716 | 13.724552   | 6.1611904   | 6.527888   | 4.18329014  | 4.30215006  | 3.27767373  | 474    | 1049   | 420    |
| 6117      | NM_001078866.NM_001257342 BC5L1   | BC5L1 homolog, ubiquitin-cytoch     | 1.318213807   | -1.973897048 | 22.795446   | 30.084077   | 1.97389704 | 5.17758073  | 5.50839808  | 4.17673584  | 1324   | 2332   | 825    |
| 6583      | NM_003059                         | solute carrier family 22 member c   | 1.227823641   | -1.973701259 | 1.98617     |             | 0.943236   | 2.39332696  | 2.63769986  | 1.65707652  | 167    | 274    | 104    |
| 374654    | NM_198525                         | kinasin family member 7             | 1.747883597   | -1.973754914 | 2.493087    | 1.188308    | 3.59454042 | 4.3482657   | 2.72513523  | 4.3482657   | 435    | 1016   | 271    |
| 28301     | NM_026835                         | tigger transposable element deriv   | 1.13589891    | -1.974332818 | 1.508635    | 1.129861    | 0.715352   | 2.6780437   | 2.33383942  | 1.90057841  | 212    | 212    | 132    |
| 287       | NM_001127493.NM_001148.NMANK2     | ankyrin 2                           | 2.098080798   | -1.976050176 | 0.217644    | 0.552385    | 0.102646   | 2.01115992  | 2.86987209  | 1.34055586  | 119    | 74     | 74     |
| 101928913 | NR_120647                         | long intergenic non-protein codin   | 1.372306593   | -1.97461364  | 0.772225    | 0.547191    | 0.365301   | 0.446849461 | 0.446849461 | 0.343943824 | 21     | 197    | 13     |
| 550631    | NM_001017437.NM_00318334 CDC1515  | colled-coil domain containing 151   | 1.870215636   | -1.97700744  | 6.927666    | 3.743471    | 2.203953   | 4.7324405   | 5.39758202  | 2.98493721  | 1342   | 1342   | 334    |
| 51260     | NM_001300888.NM_016500            | polyasaccharide biosynthesis dom    | 1.070634063   | -1.979264993 | 37.660966   | 35.270709   | 16.782857  | 5.48739785  | 5.39119595  | 4.53349849  | 1722   | 2149   | 1070   |
| 55536     | NM_001127370.NM_001127371 CDCA17  | cell division cycle associated 7 II | -1.121328847  | -1.979426821 | 26.523346   | 23.600392   | 12.631527  | 6.24283552  | 6.07992926  | 5.2762386   | 2934   | 3496   | 1823   |
| 114907    | NM_001242463.NM_058229.NMFBXO32   | F-box protein 32                    | 1.315773708   | -1.979764074 | 8.123074    | 1.97976407  | 3.778575   | 5.71081263  | 6.10011585  | 4.7521471   | 2017   | 3546   | 1253   |
| 10039     | NM_001003931.NM_005485            | poly(ADP-ribose) polymerase far     | -1.145231525  | -1.97999162  | 11.968614   | 10.473944   | 5.67185    | 4.86535215  | 4.66790832  | 3.91874377  | 1098   | 1281   | 682    |
| 100286748 | NR_034034                         | uncharacterized LOC100286748        | -1.551965717  | -1.980153862 | 5.596512    | 3.804336    | 3.6897407  | 3.11405144  | 2.80852803  | 3.91874377  | 467    | 402    | 290    |
| 114777    | NR_024052.NR_024053.NR_104HCG18   | HLA complex group 18 (non-prot      | 1.140918661   | -1.981030814 | 2.182229    | 2.495567    | 1.048559   | 4.06312959  | 4.25339596  | 3.15892009  | 933    | 948    | 383    |
| 89795     | NM_001024383.NM_014903            | neuron navigator 3                  | -2.218118452  | -1.981565397 | 1.88569     | 0.850855    | 0.893611   | 4.2524017   | 3.19220918  | 3.33801005  | 709    | 427    | 440    |
| 692195    | NR_003941                         | small nuclear RNA, C/D box 75       | 1.207302992   | -1.981723722 | 5.461059    | 6.600222    | 2.440811   | 0.41264541  | 0.4876948   | 0.22116494  | 13     | 21     | 8      |
| 101029378 | NR_110249.NR_110250               | long intergenic non-protein codin   | -2.850825054  | -1.981723722 | 0.193419    | 0.065086    | 0.087945   | 0.41264541  | 0.15624221  | 0.22116494  | 13     | 6      | 8      |
| 54968     | NM_001040613.NM_017866.NR TME170  | transmembrane protein 70            | -1.422457268  | -1.982051256 | 19.654271   | 13.850249   | 9.270649   | 4.87328317  | 4.41385336  | 4.41385336  | 1581   | 1485   | 981    |
| 24147     | NM_014344                         | four jointed box 1                  | -1.164810233  | -1.982180773 | 13.895061   | 11.946872   | 6.587605   | 5.22391452  | 5.01015048  | 4.27414582  | 1428   | 1638   | 886    |
| 9737      | NM_001099410.NM_001099411 GRASP1  | G protein-coupled receptor assos    | -1.0741079    | -1.982336939 | 1.254487    | 1.169557    | 0.595921   | 3.05484859  | 2.96451939  | 2.22845939  | 877    | 357    | 178    |
| 400322    | NR_020824                         | hect domain and RLD 2 pseudog       | -1.449600088  | -1.982621615 | 37.621693   | 25.983126   | 17.830521  | 7.80439611  | 7.2716311   | 6.82329648  | 2837   | 8053   | 5420   |
| 84216     | NM_001286211.NM_001286212 TMEM117 | transmembrane protein 117           | 1.154187866   | -1.98264175  | 2.686268    | 3.124838    | 3.14487866 | 3.3298614   | 2.39092414  | 2.39092414  | 738    | 475    | 451    |
| 84934     | NM_001286215.NM_0032848           | RBPJ interacting and tubulin ass    | -1.213413215  | -1.982768988 | 9.321525    | 7.688809    | 4.407876   | 4.29607932  | 4.03255443  | 3.37879258  | 302    | 806    | 494    |
| 23212     | NM_015169                         | ribosome biogenesis regulator h     | 1.031638297   | -1.982659452 | 45.704876   | 47.210842   | 21.662441  | 6.26546264  | 6.3096262   | 5.29614568  | 2981   | 4109   | 1849   |
| 8034      | NM_001324312.NM_001324313 BC2L16  | solute carrier family 25 member c   | 1.880128602   | -1.982908754 | 12.8801286  | 9.290405    | 5.12549634 | 4.23718571  | 4.578165125 | 4.1651257   | 1319   | 151    | 104    |
| 54476     | NM_0017111.NM_207116              | ring finger protein 216             | -1.326757049  | -1.98263847  | 13.456764   | 10.237449   | 6.357585   | 6.26498489  | 5.86318092  | 5.29538508  | 2980   | 3001   | 1648   |
| 286430    | NM_001319967                      | NLR family pyrin domain containi    | 1.104654034   | -1.983341827 | 0.514071    | 0.568992    | 0.243755   | 1.38110603  | 1.47139626  | 0.85412573  | 63     | 93     | 39     |
| 221178    | NM_001166271.NM_001286792 SPATA13 | spermatogenesis associated 13       | 1.07155222    | -1.983380084 | 3.346954    | 3.632181    | 1.59497    | 4.93482226  | 4.93482226  | 3.8985521   | 1084   | 1552   | 672    |
| 79621     | NM_001142279.NM_0024570           | ribonuclease H2 subunit B           | 1.035357176   | -1.983944132 | 14.805352   | 6.987132    | 4.61797956 | 4.66790832  | 3.68786049  | 3.68786049  | 926    | 1281   | 574    |
| 3669      | NM_001303233.NM_001303234 ISG20   | interferon stimulated exonuclease   | -1.814320348  | -1.986473268 | 13.653141   | 8.207401    | 6.817453   | 4.83204569  | 4.17162035  | 3.890818    | 1079   | 893    | 668    |
| 101050146 | NR_110846                         | charged multivesicular body prot    | 1.029424091   | -1.992103772 | 5.6921037   | 3.997722    | 1.66033952 | 3.55339947  | 3.60313922  | 3.60313922  | 362    | 698    | 698    |
| 3875      | NM_000224.NM_199187               | keratin 18                          | -2.088145189  | -1.988013471 | 5026.266865 | 2411.584006 | 2377.33207 | 12.80927287 | 11.74726895 | 11.81914335 | 281752 | 180282 | 174313 |
| 51279     | NM_001297640.NM_001297642 C1RL    | complement C1r subcomponent 1       | -1.003433092  | -1.988356276 | 19.320931   | 19.17286    | 10.364028  | 5.86188507  | 5.85702558  | 4.89455192  | 2244   | 2988   | 1388   |
| 441046    | NR_003675                         | glucuronidase, beta pseudogene      | 1.463964216   | -1.988642609 | 0.615455    | 0.899343    | 0.287151   | 1.13562816  | 1.4614436   | 0.6785857   | 47     | 92     | 29     |
| 55915     | NM_018897                         | LANC2                               | -1.409997123  | -1.988802373 | 6.421235    | 4.560684    | 3.033934   | 4.81909841  | 4.34420922  | 3.87646976  | 1069   | 1013   | 661    |
| 101870035 | NR_134840                         | ncRNA in non-homologous end j       | -1.785726918  | -1.989856595 | 7.354227    | 7.745767    | 3.435454   | 2.861140054 | 2.925251345 | 2.925251345 | 214    | 182    | 150    |
| 7761      | NM_00132429                       | zinc finger protein 214             | -1.765502136  | -1.990104475 | 2.536634    | 1.436982    | 1.193729   | 2.92543304  | 2.24380223  | 2.10885534  | 259    | 196    | 180    |
| 375593    | NM_198924                         | tripartite motif containing 73      | 1.23682069    | -1.990111995 | 0.49018     | 0.613017    | 0.224628   | 0.73313634  | 0.86372326  | 0.41288872  | 26     | 43     | 16     |
| 6331      | NM_000335.NM_001099404.NM5CN5A    | sodium voltage-gated channel al     | 6.511722428   | -1.990111995 | 0.075629    | 0.521746    | 0.036537   | 0.73313634  | 2.14343275  | 1.12124872  | 26     | 227    | 16     |
| 64131     | NM_022166                         | xylosyltransferase 1                | -1.161510838  | -1.990797226 | 0.168048    | 0.143852    | 0.079111   | 1.33814853  | 0.82086496  | 0.82086496  | 60     | 69     | 37     |
| 257396    | NR_034107.NR_104654               | uncharacterized LOC257396           | -1.243875786  | -1.991811373 | 3.767793    | 3.040315    | 1.882006   | 3.2098649   | 2.93245472  | 2.26239074  | 324    | 348    | 200    |
| 92856     | NM_001320304.NM_001320305 LMP4    | TLN4 interactor with leucine rich   | -1.004407161  | -1.991833639 | 2.15518086  | 0.991367    | 0.252152   | 1.17516856  | 1.242594521 | 1.242594521 | 374    | 56     | 66     |
| 2950      | NM_000852                         | glutathione S-transferase pi 1      | -1.122687831  | -1.99270904  | 32.079463   | 31.945874   | 15.021339  | 6.602936173 | 6.602936173 | 5.62939153  | 3294   | 5046   | 2342   |
| 10247     | NM_005836                         | reactive intermediate imine dearr   | -1.196109518  | -1.993149551 | 521.286194  | 464.831299  | 245.825623 | 8.92842356  | 8.76182898  | 7.93662026  | 19089  | 22718  | 11782  |
| 127018    | NM_001300769.NM_001300770 LYPAL1  | lysophospholipase like 1            | -1.0771444952 | -1.993559999 | 47.971649   | 40.136856   | 19.701795  | 5.59166249  | 5.33915216  | 4.62593952  | 1854   | 2071   | 1144   |
| 64782     | NM_0022767                        | apoptosis enhancing nuclease        | 1.31419709    | -1.993258655 | 18.070671   | 9.955851    | 5.3008931  | 5.2017694   | 4.34642459  | 4.34642459  | 1514   | 1878   | 934    |
| 51001     | NM_0011856                        | collagen type XVI alpha 1 chain     | 1.001307107   | -1.996599074 | 13.038985   | 1.085899    | 4.898948   | 5.79991465  | 6.18874664  | 4.82879031  | 2148   | 3774   | 1324   |
| 81890     | NM_0012909                        | mitochondrial transcription termin  | -1.379610756  | -1.996725638 | 1.984477    | 1.984477    | 0.778474   | 3.32543589  | 3.55948145  | 3.55948145  | 212    | 566    | 292    |
| 7516      | NM_0031209                        | queuine tRNA-ribosyltransferase     | -1.379610756  | -1.996725638 | 32.134814   | 23.307948   | 15.125046  | 5.55539568  | 5.10270203  | 4.58732534  | 1807   | 1750   | 1113   |
| 718       | NM_0005431                        | X-ray repair cross complementin     | -1.118590863  | -1.997779021 | 55.953331   | 50.078251   | 26.317324  | 6.20348587  | 6.04411685  | 5.22443598  | 2854   | 3409   | 1757   |
| 10349     | NM_000643                         | X-ray repair cross complementin     | -1.356884844  | -1.997864183 | 13.345189   | 9.844254    | 6.275879   | 5.35359695  | 4.92580232  | 4.38982464  | 1566   | 1542   | 964    |
| 10349     | NM_000643                         | complement C3                       | -1.140175669  | -1.998020188 | 81.311157   | 92.812584   | 38.242416  | 8.66991132  | 8.58873308  | 7.67486094  | 15951  | 24300  | 9619   |
| 10349     | NM_008282                         | ATP binding cassette subfamily i    | -1.297000024  | -1.998775107 | 0.626299    | 0.648484    | 0.385188   | 2.60741496  | 2.30073045  | 1.8266999   | 2008   | 2160   | 123    |
| 10130311  | NM_001145536                      | chromosome 17 open reading fra      | 1.618877      | -1.998775107 | 1.618877    | 1.618877    | 0.379453   | 1.76359878  | 1.52015496  | 1.15176086  | 31     | 56     | 38     |
| 5261      | NM_000294.NM_001172432            | phosphorylase kinase catalytic su   | 1.002468822   | -1.999146848 | 14.422313   | 14.759545   | 6.779007   | 6.29243623  | 6.32739943  | 5.31172406  | 3008   | 4160   | 1869   |
| 113000    | NM_001324086.NM_001324410 RPUSD1  | RNA pseudouridylate synthase d      | 1.25012428    | -1.99925662  | 16.593812   | 20.802367   | 7.730018   | 5.0573361   | 5.37073612  | 4.10041086  | 1268   | 2118   | 780    |
| 57198     | NM_001005855.NM_020452            | ATPase phospholipid transport       | 1.158319708   | -1.999482959 | 0.134552    | 0.159862    | 0.06483    | 0.83964067  | 0.93737891  | 0.87689802  | 31     | 48     | 19     |
| 1825      | NM_001941.NM_024423               | desmoolin 3                         | 1.350799623   | -1.999482959 | 0.105035    | 0.141884    | 0.046732   | 0.83964067  | 0.93737891  | 0.87689802  | 31     | 56     | 19     |
| 101292705 | NR_126864.NR_125865               | uncharacterized LOC101292705        | 1.20649287    | -1.999482959 | 0.438702    | 0.438702    | 0.438702   | 0.83964067  | 0.83964067  | 0.83964067  | 31     | 56     | 19     |
| 29327     | NM_012113                         | carbonic anhydrase 14               | -1.293059063  | -1.999482959 | 0.441377    | 0.338171    | 0.286802   | 0.83964067  | 0.83964067  | 0.83964067  | 31     | 56     | 19     |
| 515295    | NM_001144889.NM_001144890.SLC23A3 | solute carrier family 23 member c   | -1.100239991  | -1.999501735 | 3.604043    | 3.498209    | 1.638807   | 3.20189991  | 3.07960182  | 2.35062252  | 322    | 391    | 198    |
| 23160     | NM_015131                         | WD repeat domain 43                 | 1.218277667   | -2.000024611 | 66.383053   | 44.376289   | 17.094645  | 6.97829416  | 7.26109125  | 5.89641015  | 4917   | 7994   | 3020   |
| 102465801 | NR_106990                         | microRNA 7703                       | 1.003258885   | -2.000084947 | 6.081265    | 6.133032    | 2.682121   | 1.54446555  | 0.56226574  | 0.29        |        |        |        |

|           |                               |              |                                      |              |              |             |            |             |            |            |             |       |       |      |
|-----------|-------------------------------|--------------|--------------------------------------|--------------|--------------|-------------|------------|-------------|------------|------------|-------------|-------|-------|------|
| 11097     | NM_007342                     | NUPJL2       | nucleoporin like 2                   | -1.410219679 | -2.018090451 | 15.50445    | 11.00209   | 7.215772    | 4.81386993 | 4.33878278 | 3.85203285  | 10065 | 1009  | 649  |
| 643749    | NR_034108.NR_034109.NR_034109 | TRAF3IP2-AS1 | TRAF3IP2 antisense RNA 1             | 1.236269042  | -2.018101104 | 1.353584    | 1.600573   | 0.915551    | 1.74129091 | 1.11084509 | 1.96280122  | 419   | 152   | 56   |
| 6881      | NM_006284                     | TAFO10       | TATA-box binding protein associ      | -1.47556568  |              | 133.452961  | 90.566704  | 62.123622   | 6.74401371 | 5.74420525 | 5.74420525  | 9269  | 3775  | 2540 |
| 100507331 | NR_038357                     | ZSVIM8-AS1   | ZSVIM8 antisense RNA 1               | -1.653257241 | -2.019770984 | 4.942445    | 2.98345    | 2.292253    | 3.05040462 | 2.39353351 | 2.1632937   | 278   | 123   | 160  |
| 284408    | NR_040027.NR_040028           | ZNF790-AS1   | ZNF790 antisense RNA 1               | -1.832044145 | -2.020085147 | 4.445154    | 2.417148   | 1.908812    | 2.38631541 | 1.72538257 | 1.62837236  | 166   | 121   | 101  |
| 79020     | NM_001099858.NM_024054        | C7orf25      | chromosome 7 open reading fram       | -1.1567616   | -2.021347984 | 12.29079    | 10.643097  | 5.707215    | 4.51438809 | 4.31410799 | 3.56196863  | 858   | 991   | 522  |
| 7374      | NM_003362.NM_080911           | UNG          | uracil DNA glycosylase               | -1.239702054 | -2.021466691 | 46.03242    | 37.156765  | 21.247599   | 6.54981334 | 6.24349523 | 5.54989866  | 3639  | 3922  | 2214 |
| 286016    | NR_002187                     | TPH2         | triophosphate isomerase 1 pse        | -1.867407418 | -2.021632481 | 0.723445    | 0.380133   | 0.33468     | 1.27890673 | 0.81765451 | 0.76902392  | 56    | 40    | 34   |
| 147837    | NM_145278                     | ZNF563       | zinc finger protein 563              | -1.373613589 | -2.021632481 | 0.241293    | 0.301331   | 0.242493    | 0.36372326 | 0.36372326 | 0.76902392  | 56    | 40    | 34   |
| 64802     | NM_001312691.NM_001312692     | TRIT1        | RNA isopentenyltransferase 1         | -1.738834948 | -2.022193758 | 27.874271   | 17.9383468 | 12.700542   | 5.96970944 | 4.79582387 | 5.96970944  | 213   | 3235  | 1293 |
| 100507218 | NR_040017                     | RNF157-AS1   | RNF157 antisense RNA 1               | -1.223898958 | -2.022344721 | 0.392129    | 0.317554   | 0.177631    | 0.88013425 | 0.75384785 | 0.49997203  | 33    | 36    | 20   |
| 10063     | NM_005694                     | COX17        | COX17, cytochrome c oxidase cx       | -1.228980121 | -2.022747482 | 200.070114  | 162.972885 | 92.918785   | 6.38195877 | 6.08844206 | 5.83319304  | 3235  | 3517  | 1967 |
| 151827    | NM_001172779.NM_001172780     | LRRG34       | leucine rich repeat containing 34    | -1.000508341 | -2.022799409 | 2.234657    | 2.225468   | 1.018542    | 2.2896139  | 1.57922529 | 1.57922529  | 158   | 211   | 96   |
| 1787      | NM_001321006.NM_001321007     | TRDMT1       | RNA aspartic acid methyltransferase  | 1.005706064  | -2.024738604 | 0.579286    | 0.542385   | 0.26418     | 2.74535098 | 2.75234181 | 1.93223726  | 224   | 301   | 136  |
| 8637      | NM_003732                     | EIF4EBP3     | eukaryotic translation initiation fa | -1.335712086 | -2.024804504 | 4.41891     | 3.312335   | 2.049643    | 1.8928118  | 1.89172362 | 1.30472178  | 117   | 117   | 71   |
| 55726     | NM_018164                     | INTS13       | integrator complex subunit 13        | -1.217308224 | -2.025002097 | 35.127098   | 26.882116  | 16.298426   | 6.6834515  | 6.40279567 | 5.98037498  | 396   | 4386  | 2427 |
| 399815    | NR_027282                     | LOC399815    | chromosome 10 open reading fra       | -1.006986648 | -2.025333255 | 3.181226    | 3.156011   | 1.475257    | 2.91572639 | 2.90701332 | 2.08008     | 257   | 341   | 156  |
| 68686     | NM_001126121.NM_001126122     | SLC25A19     | solute carrier family 25 member 1    | -1.453378075 | -2.025478682 | 25.286979   | 17.392284  | 11.773312   | 5.37146049 | 4.84772221 | 4.38840055  | 1586  | 1458  | 963  |
| 84953     | NM_032867                     | MICALCL      | MICAL C-terminal like                | -1.916187371 | -2.025819679 | 1.044323    | 0.454735   | 2.0325186   | 0.481395   | 1.38978355 | 1.34055586  | 122   | 85    | 74   |
| 1687      | NM_001127453.NM_001127454     | DFNA5        | DFNA5, deafness associated tun       | -1.31506808  | -2.025856869 | 0.690518    | 0.524162   | 0.315535    | 1.18729361 | 0.87055986 | 0.87055986  | 66    | 67    | 40   |
| 401127    | NR_028854                     | LOC401127    | WD repeat domain 5 pseudogen         | -1.377033835 | -2.025856869 | 1.045829    | 0.757824   | 0.481137    | 1.42282133 | 1.15059938 | 0.87055986  | 66    | 64    | 40   |
| 440925    | NR_027433                     | LINC01124    | long intergenic non-protein codin    | -1.047302025 | -2.026306079 | 0.122881    | 0.123701   | 0.051405    | 0.3273552  | 0.3412894  | 0.16897038  | 10    | 14    | 6    |
| 219539    | NM_145008                     | YPEL4        | yippee like 4                        | 3.046687718  | -2.026306079 | 0.151322    | 0.463066   | 0.069531    | 0.3273552  | 0.3273552  | 0.83317479  | 10    | 41    | 6    |
| 646471    | NR_024498                     | LOC646471    | uncharacterized LOC646471            | 1.491607957  | -2.026306079 | 0.071616    | 0.107265   | 0.03283     | 0.3273552  | 0.46599441 | 0.16897038  | 10    | 20    | 6    |
| 105370888 | NR_135678                     | TMEM202-AS1  | TMEM202 antisense RNA 1              | 1.047302025  | -2.026306079 | 0.323428    | 0.345079   | 0.146238    | 0.3273552  | 0.3412894  | 0.16897038  | 10    | 14    | 6    |
| 286059    | NM_038873                     | LOC286059    | tumor necrosis factor receptor su    | 2.306188832  | -2.026306079 | 0.089951    | 0.224114   | 0.045422    | 0.3273552  | 0.068994   | 0.16897038  | 10    | 31    | 6    |
| 100126947 | NR_147034                     | LINC01517    | long intergenic non-protein codin    | -1.027484135 | -2.026306079 | 0.096503    | 0.100736   | 0.046178    | 0.3273552  | 0.31941452 | 0.16897038  | 10    | 13    | 6    |
| 80310     | NM_025088.NM_033135           | PDGFR        | platelet derived growth factor D     | -3.25953526  | -2.026306079 | 0.065388    | 0.019587   | 0.029936    | 0.3273552  | 0.10601836 | 0.16897038  | 10    | 4     | 6    |
| 85407     | NM_033119                     | NKD1         | naked cuticle homolog 1              | 1.8618629    | -2.026306079 | 0.029985    | 0.050623   | 0.012942    | 0.3273552  | 0.56226574 | 0.16897038  | 10    | 25    | 6    |
| 147685    | NM_152474                     | C19orf18     | chromosome 19 open reading fra       | 1.084274959  | -2.026755891 | 3.603113    | 3.937717   | 1.672124    | 2.0823043  | 2.17238371 | 1.37552141  | 127   | 184   | 77   |
| 79780     | NM_001318736.NM_001318737     | CDC8C2       | coiled-coil domain containing 82     | -1.198529346 | -2.028255011 | 14.872536   | 12.412199  | 8.856224    | 5.33196457 | 5.07767363 | 4.34789256  | 1542  | 1719  | 935  |
| 102723465 | NR_146472                     | ELF3-AS1     | ELF3 antisense RNA 1                 | -1.221735246 | -2.028668284 | 1.327841    | 1.098419   | 0.618478    | 1.06712786 | 0.92294555 | 0.82147005  | 47    | 26    | 47   |
| 491       | NM_001286075.NM_004320        | NM1ATP41     | ATPase sarcoplasmic/endoplasm        | -1.161221437 | -2.030296042 | 2.465508    | 1.387129   | 2.465508    | 3.45306978 | 3.45306978 | 1.68710431  | 246   | 446   | 246  |
| 4185      | NM_001318933.NM_023390        | ADAM11       | ADAM metalloproteinase domain        | 1.001426568  | -2.02972271  | 1.250811    | 1.26217    | 0.578855    | 2.68577441 | 2.68551066 | 1.87636985  | 213   | 285   | 129  |
| 10476     | NM_001003785.NM_006356        | ATP5H        | ATP synthase, H+ transporting, r     | -1.587488481 | -2.031375511 | 449.9676    | 330.065809 | 8.7583134   | 8.09203787 | 7.7583002  | 16944       | 14261 | 10259 |      |
| 133522    | NM_001127698.NM_001127699     | PPARGC1B     | PPARG coactivator 1 beta             | 1.189900555  | -2.031551643 | 1.334902    | 1.022205   | 0.522203    | 3.65704831 | 3.88957134 | 2.74752527  | 456   | 725   | 276  |
| 8495      | NM_001256568.NM_001256569     | PPFIBP2      | PPFIA binding protein 2              | -1.242045604 | -2.032754467 | 1.221877    | 1.036966   | 0.562582    | 2.17847216 | 1.65707652 | 1.65707652  | 172   | 172   | 104  |
| 17967     | NM_00114068                   | PPFIBP1      | proteinase susceptibility 1 candida  | -1.263928002 | -2.033298426 | 1.746146    | 1.971086   | 1.247322    | 3.45306978 | 3.45306978 | 1.68710431  | 246   | 446   | 246  |
| 9020      | NM_003954                     | MAP3K14      | mitogen-activated protein kinase     | -1.102934131 | -2.03391096  | 17.15509    | 15.57623   | 7.924044    | 6.24671209 | 6.10731444 | 5.24191101  | 2942  | 3564  | 1779 |
| 89874     | NM_001171170.NM_030631        | SLC25A21     | solute carrier family 25 member 2    | 1.047469564  | -2.034049467 | 0.097936    | 0.104192   | 0.097976    | 0.46682716 | 0.46582716 | 0.24657076  | 15    | 21    | 9    |
| 100130370 | NM_001272086.NM_001347841     | LOC100130370 | uncharacterized LOC100130370         | -2.207683847 | -2.034049467 | 0.298401    | 0.131772   | 0.141119    | 0.46682716 | 0.2284445  | 0.24657076  | 15    | 9     | 9    |
| 11330     | NM_007272                     | CTRC         | chymotrypsin C                       | -1.811437449 | -2.034049467 | 0.412304    | 0.230775   | 0.190859    | 0.46682716 | 0.27464693 | 0.24657076  | 15    | 11    | 9    |
| 130681    | NM_152411                     | ZNF786       | zinc finger protein 786              | -1.629842747 | -2.034120201 | 2.522165    | 1.550165   | 1.16229     | 3.31777768 | 2.56983975 | 2.30929414  | 316   | 259   | 191  |
| 90030     | NM_001163321.NM_001163322     | CDC102       | coiled-coil domain containing 122    | -1.149168075 | -2.036168163 | 2.449168075 | 2.81488075 | 2.449168075 | 3.69710431 | 3.69710431 | 1.68710431  | 246   | 446   | 246  |
| 120253    | NM_001192767.NM_001297769     | MRPS18C      | mitochondrial ribosomal subunit 18c  | -1.67100461  | -2.036244061 | 35.907759   | 22.647639  | 5.66809557  | 5.66809557 | 4.67120285 | 1.967120285 | 1967  | 1984  | 1182 |
| 10262     | NM_005850                     | SF3B4        | splicing factor 3b subunit 4         | -1.064841442 | -2.036563364 | 96.498238   | 90.721161  | 44.524143   | 7.55661017 | 7.46646699 | 6.5383248   | 7352  | 9225  | 4440 |
| 4358      | NM_002437                     | MPV17        | MPV17, mitochondrial inner mem       | -1.282381107 | -2.037037445 | 66.332298   | 51.779602  | 30.602537   | 6.04555676 | 5.04149497 | 5.04149497  | 2554  | 2661  | 1542 |
| 3140      | NM_001194999.NM_001195000     | NR1          | major histocompatibility complex     | 1.805706831  | -2.037391447 | 2.247465    | 0.475247   | 1.4772093   | 4.99384339 | 3.32070553 | 3.32070553  | 671   | 1619  | 405  |
| 23462     | NM_001040708.NM_001286251     | HEY1         | hey related family bHLH transcrip    | 4.265915973  | -2.037965145 | 0.120458    | 0.062259   | 0.101313    | 0.59399636 | 0.67499901 | 0.32020933  | 20    | 115   | 12   |
| 677354    | NR_002309                     | SLC511A7     | solute carrier family 17 member 7    | -1.047553178 | -2.037965145 | 0.173513    | 0.173513   | 0.173513    | 0.59399636 | 0.59399636 | 0.32020933  | 20    | 12    | 12   |
| 100505785 | NR_145471                     | KIRREL-IT1   | KIRREL intronic transcript 1         | -2.212442053 | -2.037965145 | 0.336098    | 0.142009   | 0.148151    | 0.59399636 | 0.29720487 | 0.32020933  | 20    | 12    | 12   |
| 102466730 | NR_106822                     | MIR6764      | microRNA 6764                        | -1.160845593 | -2.037965145 | 8.203795    | 7.091708   | 3.788367    | 0.59399636 | 0.52452456 | 0.32020933  | 20    | 23    | 12   |
| 51303     | NM_001143781.NM_001143782     | FKBP11       | FK506 binding protein 11             | -1.229466369 | -2.038968602 | 59.122731   | 47.484138  | 27.272663   | 5.52139737 | 5.23053515 | 4.52573709  | 1764  | 1917  | 1064 |
| 692213    | NR_003078                     | SNORD110     | small nuclear RNA, C/D box 11        | 1.530243826  | -2.039452387 | 30.398886   | 46.924858  | 1.69664266  | 2.14776967 | 1.69673498 | 1.06873498  | 88    | 180   | 53   |
| 10404     | NM_016134                     | CPO          | carboxypeptidase Y                   | 2.985239781  | -2.040328818 | 0.32215     | 1.001545   | 0.15353     | 0.71085839 | 1.5392602  | 0.39027104  | 25    | 100   | 15   |
| 677354    | NR_002983                     | SNORA55      | small nuclear RNA, H/ACA class 1     | -1.077162126 | -2.040328818 | 4.313454    | 4.388655   | 2.139303    | 0.7058309  | 0.68604651 | 0.39077504  | 25    | 100   | 15   |
| 114034    | NM_025077                     | TOE1         | target of EGR1, H/ACA 1 (nucle       | 1.259665657  | -2.040747127 | 10.619058   | 8.417961   | 3.872889    | 4.36546531 | 3.40723229 | 3.40723229  | 1296  | 1296  | 464  |
| 2661      | NM_001288824.NM_001288825     | GDF9         | growth differentiation factor 9      | -1.265467165 | -2.041375649 | 1.076848    | 0.862156   | 0.503232    | 1.90722898 | 1.66595383 | 1.23026757  | 108   | 114   | 65   |
| 100294362 | NR_029376                     | LOC100294362 | uncharacterized LOC100294362         | 2.936932805  | -2.04191059  | 0.209081    | 0.622482   | 0.097293    | 0.81895953 | 1.70021226 | 0.45708734  | 30    | 118   | 18   |
| 692198    | NR_003944                     | SNORD78      | small nuclear RNA, C/D box 78        | 1.017385541  | -2.042700524 | 51.394054   | 52.200321  | 23.611427   | 2.09095564 | 2.11004283 | 1.73525211  | 128   | 174   | 77   |
| 6004      | NM_001184906.NM_0032875       | FBXL20       | F-box and leucine rich repeat pr     | -1.17865212  | -2.042750943 | 1.978909    | 1.765582   | 1.217467    | 4.38962886 | 4.38962886 | 1.23822212  | 701   | 1047  | 62   |
| 1124961   | NM_002938                     | RGSB16       | regulator of G-protein signaling 1   | 1.943046137  | -2.043043375 | 0.389697    | 0.726347   | 0.169667    | 0.91952222 | 1.5412181  | 0.52045463  | 35    | 91    | 21   |
| 415117    | NM_001001850                  | STX19        | syntaxin 19                          | -1.4567429   | -2.043245195 | 5.450677    | 3.747117   | 2.49742     | 2.83562844 | 2.38212036 | 2.0010274   | 241   | 221   | 145  |
| 5228      | NM_001207012.NM_001293643     | PGF          | placental growth factor              | -1.729532953 |              |             |            |             |            |            |             |       |       |      |

|           |                                         |                                   |              |              |            |            |            |             |             |             |        |       |       |
|-----------|-----------------------------------------|-----------------------------------|--------------|--------------|------------|------------|------------|-------------|-------------|-------------|--------|-------|-------|
| 100506098 | NR_134567.NR_134568.NR_134569.NR_134570 | uncharacterized LOC100506098      | -4.77593096  | -2.069656056 | 6.760151   | 1.421325   | 2.911165   | 2.58923814  | 1.03456085  | 1.77525664  | 197    | 55    | 117   |
| 10056     | NM_001104546.NM_006413                  | PPP30                             | -1.53599799  | -2.069892631 | 14.328838  | 14.328838  | 22.35979   | 6.13140667  | 5.52324054  | 5.10364045  | 2713   | 2360  | 1612  |
| 81568     | NM_030809.NR_045072                     | CSRPN2                            | -1.056381269 | 9.377167     | 9.801444   | 9.377167   | 4.531008   | 5.51498275  | 5.43762501  | 4.9891596   | 1756   | 2221  | 1042  |
| 150223    | NM_001017064                            | YJC1C                             | -1.05504952  | 25.185299    | 23.893688  | 25.185299  | 11.403862  | 5.08032757  | 5.00416403  | 4.07226968  | 1289   | 1631  | 764   |
| 10721     | NM_199420                               | POLQ                              | 1.300476842  | -2.075168886 | 11.057846  | 14.39844   | 5.00608    | 6.57816514  | 6.9532725   | 5.54103391  | 3712   | 6450  | 2200  |
| 494143    | NM_001008708.NM_001346127               | CHAC2                             | 1.158816402  | -2.075542717 | 6.673609   | 7.769664   | 3.015213   | 3.27584855  | 3.46799726  | 3.27386535  | 341    | 528   | 202   |
| 407014    | NR_029498                               | MIR25                             | -1.29893035  | -2.075644905 | 21.998415  | 16.87532   | 9.903317   | 1.48977343  | 1.25799553  | 0.90287695  | 71     | 73    | 42    |
| 146780    | NM_178568                               | RTNLR1                            | -4.10524708  | -2.075644905 | 0.510757   | 0.118962   | 0.230988   | 1.48977343  | 0.52452466  | 0.90287695  | 71     | 23    | 42    |
| 54502     | NM_001098634.NM_019027                  | EDM47                             | -1.440429333 | 14.313598    | 8.89784    | 14.313598  | 6.444966   | 6.11771306  | 5.83648696  | 5.08615807  | 2687   | 2557  | 1592  |
| 7355      | NM_001032289.NM_001042498               | SLC35A2                           | 1.073039304  | -2.075814942 | 10.145241  | 9.902516   | 5.029531   | 4.57731129  | 4.88297626  | 3.58704079  | 618    | 1276  | 532   |
| 401251    | NM_001039561                            | SAPCD1                            | -2.05125153  | -2.076052404 | 0.485204   | 0.199216   | 0.5190475  | 0.27464693  | 0.27153692  | 0.27153692  | 17     | 11    | 10    |
| 55924     | NM_010909.NM_198926                     | FAM212B                           | -2.19402878  | -2.076672867 | 0.523806   | 0.237175   | 0.236823   | 2.02024721  | 1.25799553  | 1.30472178  | 120    | 73    | 71    |
| 161582    | NM_001033559.NM_001033560               | DNAAF4                            | 1.317427061  | -2.077407722 | 1.866041   | 2.497703   | 0.844857   | 2.20692365  | 2.52753672  | 1.45395569  | 142    | 250   | 84    |
| 26768     | NR_004044                               | SNORA73B                          | -1.433015237 | -2.077542368 | 65.945869  | 46.065937  | 29.835176  | 3.28462152  | 3.34888182  | 2.87519973  | 517    | 482   | 306   |
| 117145    | NM_053055                               | THEM4                             | 1.011196053  | -2.07864118  | 2.563376   | 2.598567   | 1.157149   | 3.78944995  | 3.81336732  | 2.85056786  | 507    | 685   | 300   |
| 644783    | NR_015360                               | LINC01184                         | -1.119415411 | -2.079032483 | 1.11941541 | 1.485427   | 2.94189    | 3.38891307  | 3.32474558  | 3.24740588  | 372    | 444   | 220   |
| 2020      | NM_001427                               | EN2                               | -2.45762157  | -2.080551763 | 0.802016   | 0.363397   | 0.326184   | 1.87753473  | 1.06116576  | 1.19154816  | 105    | 57    | 62    |
| 23145     | NM_198455                               | SSPO                              | 1.39612393   | -2.080810528 | 0.249558   | 0.348613   | 0.112094   | 2.26158951  | 2.65526948  | 1.4969322   | 149    | 278   | 88    |
| 246181    | NM_001348421.NR_040288.NR_AKRT7         | aldo-keto reductase family 7 like | 1.179143     | -2.082107092 | 1.179143   | 1.316598   | 0.534079   | 1.82664439  | 1.99055518  | 1.15176086  | 100    | 156   | 59    |
| 100529257 | NM_001202547.NM_001202548               | SYN2BZ-COX16                      | 1.496188133  | -2.082298166 | 1.047666   | 1.582527   | 0.459148   | 1.57857476  | 1.99055518  | 0.96541723  | 78     | 156   | 46    |
| 100534012 | NM_001204648.NR_144937                  | TNFAIP8L2-SCNM1                   | 1.437897459  | -2.082639157 | 0.744257   | 0.511605   | 0.330196   | 1.27806073  | 0.99371033  | 0.75138414  | 56     | 52    | 33    |
| 1298      | NM_001852                               | COL9A2                            | 2.34898944   | -2.083420402 | 0.310229   | 0.76475    | 0.14086    | 0.8996265   | 1.63971536  | 0.49997203  | 34     | 111   | 20    |
| 7409      | NM_001258206.NM_001258207               | VAV1                              | -1.039756668 | -2.083991268 | 18.657658  | 17.994816  | 8.405213   | 5.76181945  | 5.70662732  | 4.73092712  | 2091   | 2687  | 1234  |
| 5373      | NM_000303                               | PMM2                              | 1.06575482   | -2.083998139 | 26.286325  | 28.050236  | 11.852281  | 5.91826784  | 6.08867482  | 4.88447218  | 2335   | 3325  | 1378  |
| 162979    | NM_145288                               | ZNF296                            | 1.008204048  | -2.084706877 | 6.173617   | 6.228552   | 2.782565   | 3.52282116  | 3.53359042  | 2.59272293  | 412    | 555   | 243   |
| 79631     | NM_001145348.NM_002473                  | KDM8                              | 1.13865995   | -2.085616463 | 2.53078    | 2.968409   | 1.166894   | 2.86114003  | 3.02965795  | 2.0010274   | 246    | 376   | 145   |
| 100570861 | NR_146561                               | LINC01323                         | 0.15074294   | -2.085698575 | 0.15074294 | 0.816032   | 0.255221   | 0.368222    | 1.56713391  | 0.0618259   | 51     | 133   | 30    |
| 11259     | NM_001024549.NM_001282793               | FILIP1L                           | 1.203162306  | -2.08663639  | 15.328673  | 17.763464  | 6.908103   | 5.64404118  | 5.90900704  | 4.61378826  | 1924   | 3093  | 1134  |
| 100289124 | NR_103714.NR_103714_dup1                | FAM27E2                           | 1.121567544  | -2.087047357 | 0.166762   | 0.19236    | 0.07317    | 0.38477185  | 0.42561204  | 0.19530369  | 12     | 18    | 7     |
| 100423037 | NR_036137                               | MIR3176                           | 1.245204039  | -2.087047357 | 0.324122   | 0.4304162  | 1.365535   | 0.38477185  | 0.45699441  | 0.19530369  | 12     | 20    | 7     |
| 102465447 | NR_108085                               | MIR6747                           | 1.368840535  | -2.087047357 | 0.453847   | 0.700987   | 2.014724   | 0.38477185  | 0.50527715  | 0.19530369  | 12     | 22    | 7     |
| 84319     | NM_001167924.NM_032359                  | CMS51                             | 1.409374865  | -2.087468907 | 35.338305  | 49.625202  | 15.887479  | 5.43559657  | 4.40964229  | 4.40964229  | 1660   | 3126  | 978   |
| 64028     | NM_002261.NR_024539                     | ARHGAP3                           | -2.188642957 | -2.087801529 | 1.213352   | 1.403293   | 1.04094292 | 1.44089422  | 1.44089422  | 1.44089422  | 86     | 86    | 86    |
| 9034      | NM_001130910.NM_003965                  | CCRL2                             | -1.361326287 | -2.087747333 | 3.221928   | 3.27433    | 1.437767   | 2.68948191  | 2.32228731  | 1.85174813  | 214    | 210   | 126   |
| 1870      | NM_004091                               | E2F2                              | 1.220424286  | -2.088015078 | 4.104856   | 5.016287   | 1.846911   | 4.44353723  | 4.7189277   | 3.45160249  | 815    | 1329  | 480   |
| 100505839 | NR_038940                               | SH3PXD2A-AS1                      | -3.12420889  | -2.088669596 | 2.700851   | 0.859381   | 2.60071453 | 1.43116693  | 1.8266989   | 2.309       | 89     | 233   | 437   |
| 79002     | NM_001329738.NM_001329739               | C18orf43                          | -1.145803433 | -2.089174267 | 193.944502 | 169.69366  | 85.706354  | 7.5528968   | 6.49828406  | 6.49828406  | 7039   | 8551  | 1217  |
| 9157      | NR_017418                               | CLSTR3                            | -1.090735567 | -2.089732967 | 35.337967  | 32.16587   | 15.9312657 | 7.11571007  | 6.97866287  | 6.0336595   | 5403   | 6958  | 374   |
| 57404     | NM_177538                               | CYP20A2                           | 1.01772464   | -2.089828123 | 1.984995   | 2.522332   | 0.892456   | 4.47030848  | 4.49452466  | 3.34757349  | 831    | 1130  | 486   |
| 284184    | NM_001085621                            | NDUFAF8                           | -1.105406091 | -2.089913951 | 3.201897   | 14.483893  | 42.1529532 | 0.47885924  | 0.7885924   | 3.23384841  | 690    | 834   | 409   |
| 25896     | NM_001199809.NM_001199811               | INTS7                             | -2.209536097 | -2.091688848 | 13.277574  | 10.996291  | 5.967771   | 5.89869115  | 5.62928167  | 4.85998553  | 2303   | 2544  | 1354  |
| 4487      | NM_002448                               | MSX1                              | -1.181787772 | -2.093583667 | 1.853141   | 1.57141    | 0.83095    | 2.17473011  | 1.99055518  | 1.42061713  | 138    | 156   | 81    |
| 100652781 | NR_045011                               | SNX29P1                           | -1.822115548 | -2.094489133 | 1.089675   | 0.580449   | 0.482178   | 1.03161781  | 0.65251278  | 0.58209275  | 41     | 30    | 24    |
| 728487    | NM_001282490                            | COL4A3B                           | -1.494928478 | -2.09522533  | 1.202153   | 0.7283     | 0.5802783  | 2.43802283  | 2.38745923  | 1.93874768  | 242    | 196   | 146   |
| 10623     | NM_001303456.NM_006468                  | POLR3C                            | 1.24510164   | -2.095419803 | 6.426085   | 7.174662   | 2.890531   | 4.67116511  | 4.82267239  | 3.66448845  | 961    | 1432  | 564   |
| 54538     | NM_001301088.NM_019055                  | ROBO4                             | -1.79643628  | -2.096202829 | 0.475651   | 0.261977   | 0.210481   | 1.47662927  | 0.99371033  | 0.8860889   | 70     | 52    | 41    |
| 10084     | NM_001032381.NM_001032382               | PQB1P1                            | -1.029701027 | -2.096343242 | 41.353182  | 41.868277  | 18.519715  | 5.31995475  | 5.2787986   | 4.29103243  | 1529   | 1984  | 897   |
| 133923    | NM_002037                               | ZNF474                            | 1.308385209  | -2.097469506 | 0.308901   | 0.415424   | 0.132305   | 0.68823103  | 1.00475989  | 0.36729312  | 24     | 42    | 14    |
| 57216     | NM_001733                               | VANGL2                            | 1.64899488   | -2.097469506 | 0.115331   | 0.191138   | 0.052081   | 0.08823103  | 0.08729312  | 0.36729312  | 24     | 53    | 14    |
| 1005653   | NR_002899                               | ARHGAP3                           | -2.431521991 | -2.09790957  | 1.31255142 | 0.4297857  | 0.364891   | 1.23264156  | 1.47139625  | 0.71153405  | 53     | 133   | 53    |
| 10865     | NM_001319055.NM_001319057               | ARID5A                            | 1.295730687  | -2.098886634 | 3.589761   | 4.771466   | 1.639362   | 3.1490272   | 3.48529134  | 2.2473458   | 309    | 535   | 181   |
| 55608     | NM_001286721.NM_017664.NR_AKNRD10       | ankyrin repeat domain 10          | -1.644362173 | -2.098927831 | 64.010056  | 51.033663  | 40.989565  | 7.36750928  | 6.65558437  | 6.30739837  | 6444   | 5236  | 267   |
| 5478      | NM_001300881.NM_0021130                 | PIPA                              | -1.721325451 | -2.099532961 | 145.762207 | 87.713856  | 65.5816698 | 11.67574349 | 10.89254079 | 10.60615847 | 128401 | 99667 | 75219 |
| 81892     | NM_001267863.NM_001267864               | SLRP                              | -1.35621427  | -2.10021903  | 298.365905 | 219.879669 | 133.154912 | 6.90168761  | 6.46638246  | 5.84432468  | 4655   | 4586  | 272   |
| 64779     | NM_001159377.NM_001159378               | MTFHS3D                           | -2.17560212  | -2.100458874 | 7.674607   | 9.772033   | 3.425419   | 4.57289808  | 4.9065075   | 3.56701951  | 595    | 1523  | 524   |
| 100565653 | NR_028989                               | ARHGAP27P1-BPTFP1-KPN2A2          | -2.431521991 | -2.100458874 | 79.879517  | 79.879517  | 40.989565  | 7.36750928  | 6.65558437  | 6.30739837  | 6444   | 5236  | 267   |
| 57560     | NM_001190241.NM_001190242               | FTB80                             | -1.043032827 | -2.102493536 | 32.423311  | 31.151599  | 14.391494  | 5.05408219  | 5.99386622  | 5.1875405   | 918    | 6633  | 3029  |
| 55006     | NM_0017910                              | TRMT61B                           | -1.092242965 | -2.102520149 | 13.536634  | 12.407876  | 6.046369   | 4.66103338  | 4.53897585  | 3.6502813   | 954    | 1167  | 558   |
| 80755     | NM_001261434                            | AARS1D                            | -1.161298528 | -2.103008493 | 43.181404  | 37.222894  | 19.297329  | 5.8669311   | 5.65516321  | 4.82141214  | 2252   | 2591  | 1317  |
| 100528020 | NM_001258400                            | FAM187A                           | 1.651340591  | -2.103028514 | 0.798639   | 1.318743   | 0.347758   | 1.15225689  | 1.59489542  | 0.65979727  | 48     | 106   | 28    |
| 4157      | NM_002336                               | CLSTR3                            | -2.162532891 | -2.103632961 | 3.164015   | 3.840151   | 3.3676087  | 3.39927293  | 3.43512239  | 3.43512239  | 811    | 115   | 66    |
| 57102     | NM_001304811.NM_001346153               | C12orf4                           | -1.08625414  | -2.104810634 | 5.173118   | 5.185175   | 4.44015563 | 4.32648483  | 4.32648483  | 3.43788301  | 413    | 1000  | 475   |
| 105373113 | NR_146920                               | LINC01703                         | -2.906913625 | -2.104833251 | 2.110358   | 0.730313   | 0.929384   | 1.50279892  | 0.70406985  | 0.90287695  | 72     | 33    | 42    |
| 100505994 | NR_103548.NR_103549                     | LUCAT1                            | 4.237576334  | -2.104836364 | 7.516803   | 31.657974  | 3.779006   | 2.82010209  | 4.73863474  | 1.95553368  | 238    | 1348  | 139   |
| 90506     | NM_003413                               | LRR4C6                            | 1.58522267   | -2.105349975 | 1.132314   | 1.80787    | 0.501246   | 1.65056839  | 1.01065917  | 1.01065917  | 84     | 178   | 49    |
| 654483    | NM_001039182.NM_001039182               | BOLA2B                            | -1.418007401 | -2.106928948 | 34.768044  | 24.536871  | 15.490361  | 5.14510661  | 4.65813802  | 4.11427824  | 1360   | 1272  | 788   |
| 80863     | NM_030551                               | PRR12                             | -2.256976    |              |            |            |            |             |             |             |        |       |       |

|           |                                    |                                    |                                    |              |              |             |            |            |             |             |            |            |       |       |      |
|-----------|------------------------------------|------------------------------------|------------------------------------|--------------|--------------|-------------|------------|------------|-------------|-------------|------------|------------|-------|-------|------|
| 4722      | NM_004551                          | NDUFS3                             | NADH:ubiquinone oxidoreductas      | -1.565161109 | -2.121374361 | 126.182861  | 80.70533   | 55.899094  | 6.89274735  | 6.25326287  | 5.82126025 |            |       | 3949  | 2682 |
| 6556      | NM_000578                          | SLC11A1                            | solute carrier family 11 member    | -1.285126389 | -2.121577616 | 0.172534    | 0.075935   | 0.075935   | 0.73313634  | 0.73313634  | 0.59904473 | 0.39027104 | 27    | 15    |      |
| 220402    | NM_145018                          | DDA1S                              | DNA damage induced apoptosis       | -1.376102179 | -2.12158596  | 7.647692    | 5.581289   | 3.384302   | 4.34681481  | 4.34681481  | 3.75578721 | 1062       | 1015  | 604   |      |
| 84315     | NM_001142501.NM_033255             | MON1A                              | MON1 homolog A, secretory traff    | 1.060256547  | -2.121843491 | 2.978813    | 3.128438   | 1.425337   | 2.89117014  | 2.89117014  | 2.96451939 | 252        | 357   | 146   |      |
| 9836      | NM_014793                          | LCMT2                              | leucine carboxyl methyltransferas  | 1.222752342  | -2.122934378 | 5.213749    | 6.385347   | 2.309501   | 3.95117646  | 4.22426305  | 2.96534934 | 568        | 928   | 329   |      |
| 53917     | NM_001031677.NM_130781.NR.RAB24    | RAB24, member RAS oncogene         |                                    | -1.776190272 | -2.1231729   | 23.92886    | 13.848051  | 10.92357   | 4.57288311  | 4.37203039  | 4.37203039 | 1590       | 1196  | 921   |      |
| 782       | NM_000723.NM_199247.NM_19CACNB1    | calcium voltage-gated channel al   |                                    | -1.031312328 | -2.123451092 | 13.547243   | 13.734529  | 6.506745   | 5.58402213  | 5.54047969  | 4.53091599 | 1844       | 2389  | 1068  |      |
| 10873     | NM_001014811.NM_001161586.ME3      | malic enzyme 3                     |                                    | -1.055822786 | -2.123718487 | 14.648983   | 14.354231  | 7.745965   | 5.17299774  | 5.17299774  | 4.20455055 | 1454       | 1840  | 842   |      |
| 219833    | NM_001256088.NM_145013.NR.C11orf45 | chromosome 11 open reading fra     |                                    | -2.238577912 | -2.12514701  | 1.187594    | 0.531267   | 0.531267   | 5.24863154  | 5.24863154  | 4.52971203 | 166        | 99    | 168   |      |
| 92162     | NM_001131941.NM_203411             | TMEM88                             | transmembrane protein 88           | -1.021655903 | -2.12709742  | 2.929982    | 1.176391   | 0.929982   | 1.21691895  | 1.23481189  | 0.89713258 | 52         | 71    | 30    |      |
| 64901     | NM_022897                          | RANBP17                            | RAN binding protein 17             | -1.031226886 | -2.12605954  | 6.977137    | 7.774849   | 3.082815   | 5.00451141  | 4.96154856  | 3.96539376 | 1221       | 1582  | 706   |      |
| 7128      | NM_001270507.NM_001270508.TNFAIP3  | TNF alpha induced protein 3        |                                    | 1.202920859  | -2.127550848 | 7.764789    | 9.370315   | 3.431201   | 5.19912125  | 5.45904106  | 4.15342015 | 1403       | 2255  | 811   |      |
| 167555    | NM_205548                          | FAM151B                            | family with sequence similarity 1f | 1.133558475  | -2.128017019 | 0.500307    | 0.568335   | 0.211766   | 3.088013425 | 0.96581954  | 0.47868902 | 33         | 50    | 19    |      |
| 13        | NM_0011086                         | AADAC                              | arylesterase                       | 1.161288547  | -2.128331379 | 48.422211   | 56.298973  | 21.377903  | 6.26163619  | 6.4747559   | 5.19292756 | 2973       | 4613  | 1737  |      |
| 15507     | NM_001145549.NM_030810             | TNXCDS                             | thioredoxin domain containing 5    | -1.031554182 | -2.128971276 | 29.558119   | 28.10242   | 13.04803   | 6.43303663  | 6.38975095  | 5.36155532 | 4626       | 3353  | 1918  |      |
| 100379224 | NR_033341                          | LOC100379224                       | uncharacterized domain containing  | -1.038897293 | -2.128960616 | 0.104811    | 0.103361   | 0.045222   | 0.43999062  | 0.42561204  | 0.22116494 | 14         | 18    | 8     |      |
| 10129151  | NR_135691                          | LINC02204                          | long intergenic non-protein codin  | 1.280883431  | -2.132860616 | 0.114241    | 0.145153   | 0.049877   | 0.43999062  | 0.54351856  | 0.22116494 | 14         | 24    | 8     |      |
| 103752589 | NR_125805                          | TMEM92-AS1                         | TMEM92 antisense RNA 1             | -1.038897293 | -2.132860616 | 0.489062    | 0.468657   | 0.192033   | 0.43999062  | 0.42561204  | 0.22116494 | 14         | 18    | 8     |      |
| 619189    | NM_001258031.NM_001258032.SERINC4  | serine incorporator 4              |                                    | 1.440045618  | -2.132860616 | 0.141779    | 0.208231   | 0.060698   | 0.59904473  | 0.59904473  | 0.22116494 | 14         | 27    | 8     |      |
| 728734    | NM_001310136                       | NPfPB8                             | nuclear pore complex interacting   | 1.107115855  | -2.134021597 | 1.46039     | 1.624591   | 0.639651   | 1.81299682  | 0.90287895  | 0.90287895 | 73         | 108   | 42    |      |
| 6083      | NR_000006                          | SNORD21                            | small nuclear RNA, C/D box 21      | 1.108198425  | -2.134021597 | 20.026529   | 18.014286  | 8.641097   | 1.51570785  | 1.42093184  | 0.30287895 | 31         | 38    | 42    |      |
| 26813     | NR_000016                          | SNORD38C                           | small nuclear RNA, C/D box 38      | -1.096748037 | -2.134556633 | 64.307182   | 58.636852  | 28.152529  | 2.37926962  | 2.27254712  | 1.56919173 | 195        | 201   | 95    |      |
| 84733     | NM_005189.NM_032647                | CBX2                               | chromobox 2                        | 1.550429212  | -2.136811615 | 1.99115     | 2.924992   | 0.931301   | 3.07682646  | 3.64770479  | 2.16322937 | 262        | 605   | 168   |      |
| 171755    | NM_001282309.NM_001282310.CATSPER2 | cation channel sperm associated    |                                    | -1.954345952 | -2.136889101 | 4.253785    | 2.175242   | 1.732728   | 2.92543304  | 2.12902957  | 2.03057861 | 259        | 177   | 149   |      |
| 80975     | NM_001288749.NM_001288750.TMPRSS55 | transmembrane protease, serine     |                                    | -3.419720845 | -2.137408693 | 0.727556    | 0.174386   | 0.278159   | 1.24819466  | 0.48576948  | 0.71144405 | 31         | 314   | 211   |      |
| 90120     | NM_001256526.NM_152533.NR.TMEM250  | transmembrane protein 250          |                                    | -1.024253464 | -2.137415256 | 9.216088    | 9.828691   | 4.279058   | 4.70114026  | 4.66790352  | 3.66659427 | 982        | 1281  | 565   |      |
| 143238    | NR_024606                          | LCX2-AS1                           | LCX2 antisense RNA 1               | 1.68926225   | -2.13875711  | 1.56924     | 1.914941   | 0.249037   | 1.56924     | 1.47081438  | 1.25450407 | 334        | 207   | 12    |      |
| 401105    | NR_024413                          | FLJ42393                           | uncharacterized LOC041105          | -1.03899746  | -2.139295391 | 0.237532    | 0.22508    | 0.105502   | 0.06181384  | 0.59904473  | 0.32020933 | 21         | 27    | 12    |      |
| 100133204 | NM_001350649                       | Ctorf417                           | chromosome 9 open reading frar     | -1.333849241 | -2.139295391 | 0.183072    | 0.140531   | 0.082797   | 0.61813834  | 0.48576948  | 0.32020933 | 21         | 21    | 12    |      |
| 338817    | NR_033890                          | LINC01252                          | long intergenic non-protein codin  | -2.011821018 | -2.139834244 | 1.667645    | 0.830805   | 0.734224   | 2.80440683  | 1.99055518  | 1.92438744 | 235        | 156   | 135   |      |
| 100596083 | NR_104183.NR_104184                | VASH1-AS1                          | VASH1 antisense RNA 1              | -1.702592578 | -2.140582403 | 9.680801    | 10.611809  | 4.475826   | 4.15055879  | 4.24816177  | 3.14210594 | 658        | 943   | 378   |      |
| 121227    | NM_001158051.NM_153377             | LRIG3                              | leucine rich repeats and immuno    | -1.397391361 | -2.1409487   | 2.889287    | 2.069358   | 1.264067   | 3.64240927  | 3.20419534  | 2.66998823 | 451        | 431   | 259   |      |
| 101925869 | NR_024172.NR_024173                | LINC00023                          | long intergenic non-protein codin  | 1.13085409   | -2.14307569  | 0.15307569  | 0.15307569 | 0.15307569 | 0.15307569  | 0.05116931  | 0.05116931 | 28         | 49    | 37    |      |
| 9297      | NR_002559                          | SNORD29                            | small nuclear RNA, C/D box 29      | 1.13568542   | -2.143925358 | 115.049828  | 130.851639 | 50.392349  | 3.05045588  | 3.21312006  | 2.1362985  | 286        | 434   | 164   |      |
| 8061      | NM_001300844.NM_001300855.FOSL1    | FOS like 1, AP-1 transcription fac |                                    | -1.029405399 | -2.146876977 | 364.581325  | 354.974399 | 158.696553 | 9.26475664  | 9.22301416  | 8.16519676 | 24111      | 31295 | 13813 |      |
| 85416     | NM_033132.NR_146224.NR_14ZIC5      | Zic family member 5                |                                    | 1.535934291  | -2.147442391 | 0.299819    | 0.474499   | 0.130452   | 1.27880673  | 0.67459051  | 0.3732601  | 96         | 115   | 32    |      |
| 105370333 | NR_132422                          | LOC105370333                       | uncharacterized LOC105370333       | -1.004846625 | -2.149339043 | 2.34328     | 2.341613   | 1.022305   | 1.73025772  | 1.72538257  | 1.05442063 | 91         | 121   | 52    |      |
| 64134     | NM_001330371.NM_022761             | LOC105371                          | chromosome 11 open reading fra     | -2.234630321 | -2.151671448 | 2.234630321 | 19.181348  | 9.247944   | 4.379544343 | 4.262591274 | 4.18212951 | 1584       | 2165  | 2837  |      |
| 645644    | NR_024492                          | FLJ42627                           | uncharacterized LOC045644          | 1.045060252  | -2.152915264 | 1.799659    | 1.881891   | 0.783419   | 3.78280227  | 3.81727465  | 2.7696269  | 492        | 687   | 281   |      |
| 9047      | NM_001161441.NM_001161442.SH2D2A   | SH2 domain containing 2A           |                                    | -1.126074431 | -2.153855866 | 2.972419    | 2.685061   | 1.302456   | 2.46162969  | 2.32288731  | 1.62837236 | 210        | 210   | 101   |      |
| 9532      | NM_004282                          | BAG2                               | BCL2 associated atrophagen 2       | -1.263005252 | -2.153876502 | 6.833424    | 5.408387   | 2.975788   | 3.8730763   | 3.5618123   | 2.87519973 | 536        | 567   | 306   |      |
| 5837      | NM_001164716.NM_005609             | PYGM                               | glycogen phosphorylase, muscle     | -1.118344437 | -2.154131956 | 1.159872    | 1.037689   | 0.500952   | 2.26158951  | 2.13530335  | 1.46482043 | 275        | 178   | 85    |      |
| 56342     | NM_0013467139.NM_001346140.PPAN    | peter pan homolog (Drosophila)     |                                    | 1.228974567  | -2.154504114 | 25.489562   | 31.307449  | 5.9405717  | 5.9405717   | 6.23368101  | 4.85998963 | 2372       | 3895  | 1354  |      |
| 64134     | NM_001130710.NM_001139491.SMS15    | SMS15 homolog, UR                  |                                    | 1.6164515    | -2.155145392 | 35.96735    | 22.145356  | 6.23525804 | 5.56545222  | 5.56545222  | 4.18212951 | 316        | 375   | 165   |      |
| 440270    | NM_001032567.NR_027410             | GOLGA8B                            | polglin A8 family member B         | -1.327429659 | -2.155833146 | 30.922999   | 30.922999  | 18.104444  | 8.01039189  | 7.60358232  | 6.90858051 | 10074      | 10150 | 5753  |      |
| 6650      | NM_005632                          | CAPN15                             | calpain 15                         | 1.014701788  | -2.156215472 | 33.759842   | 34.292229  | 14.712509  | 7.29401527  | 7.31483823  | 6.19607391 | 6122       | 8300  | 3492  |      |
| 7678      | NM_001243740.NM_001297567.ZNF124   | zinc finger protein 124            |                                    | 1.14708418   | -2.156556023 | 3.493854    | 3.849968   | 1.565459   | 3.19790087  | 3.37562608  | 2.25996639 | 312        | 492   | 183   |      |
| 104413891 | NR_126423                          | SAPCD1-AS1                         | SAPCD1 antisense RNA 1             | -4.792324341 | -2.156870517 | 2.372401    | 0.537773   | 0.102579   | 1.30878237  | 0.42561204  | 0.75138414 | 56         | 18    | 33    |      |
| 5682      | NM_001143937.NM_002786.MPMSA1      | proteasome subunit alpha 1         |                                    | -1.73030488  | -2.157446172 | 489.613283  | 284.017753 | 212.217967 | 9.18833387  | 8.39894129  | 8.08180659 | 22865      | 17654 | 13035 |      |
| 100117267 | NR_136818.NR_147075                | LOC105371267                       | p53-regulated mcrRNA               | -1.216213094 | -2.157489084 | 0.558798    | 0.392961   | 0.191601   | 0.12612304  | 0.19472684  | 0.19472684 | 51         | 56    | 29    |      |
| 51504     | NM_001286082.NM_001286084.TRMT112  | RNA methyltransferase 11-2 hor     |                                    | -2.148550796 | -2.157967363 | 128.22125   | 102.741191 | 55.690969  | 7.36372137  | 7.04568804  | 6.26412715 | 6427       | 6878  | 3663  |      |
| 60314     | NM_021640                          | C12orf10                           | chromosome 12 open reading fra     | -1.353586983 | -2.15983082  | 47.598106   | 35.198986  | 20.700066  | 5.84088162  | 5.41266157  | 4.75878381 | 2211       | 2182  | 1258  |      |
| 3202      | NM_019102                          | HOXA5                              | homeobox A5                        | -1.932663195 | -2.160029474 | 3.875959    | 2.003065   | 1.681285   | 2.86114003  | 2.08433212  | 1.96321628 | 246        | 170   | 140   |      |
| 100505636 | NR_102739.NR_102740.NR_10LINC01024 | long intergenic non-protein codin  |                                    | -1.190801376 | -2.161630002 | 2.280015    | 1.831347   | 0.94638    | 2.93987166  | 2.72348335  | 2.03057861 | 262        | 294   | 149   |      |
| 23599     | NM_001321978.NM_001321979.PDSB1    | decarboxyl phosphatase synthas     |                                    | 1.259348245  | -2.162487161 | 7.813876    | 9.865091   | 3.36277    | 3.53444966  | 4.24761625  | 2.92718887 | 561        | 944   | 319   |      |
| 101928689 | NR_109828                          | LINC01424                          | uncharacterized LOC101424          | -1.287113606 | -2.163209643 | 1.403393    | 1.116238   | 0.19073    | 1.5285502   | 1.31437719  | 0.90287895 | 74         | 78    | 42    |      |
| 122060    | NM_001040153.NM_001242868.SLAN1    | SLAN1 motif family member 1        |                                    | -4.347666839 | -2.164480131 | 1.00987     | 0.230239   | 0.477137   | 1.93632539  | 1.20457043  | 1.0511     | 111        | 34    | 63    |      |
| 101928069 | NR_120586                          | LOC101928069                       | uncharacterized LOC101928069       | -1.214192653 | -2.165746288 | 1.839182    | 1.511081   | 0.797564   | 1.33814853  | 1.1751656   | 0.76962392 | 60         | 66    | 34    |      |
| 64097     | NM_001347887.NM_001347888.EPB41L4A | erythrocyte membrane protein b     |                                    | -1.734840894 | -2.166648551 | 2.62423     | 1.57025    | 1.132126   | 3.70855202  | 2.99243508  | 2.71606984 | 474        | 365   | 269   |      |
| 348738    | NM_186268                          | C2orf48                            | chromosome 2 open reading fra      | 1.008089131  | -2.167694857 | 2.661023    | 2.827766   | 1.152761   | 2.57090169  | 2.64211237  | 1.71282633 | 194        | 275   | 110   |      |
| 100117267 | NM_001286373.NM_001286374.TCM40L   | translocase of outer mitochondria  |                                    | -1.032630475 | -2.167699913 | 5.684691    | 2.872157   | 2.182283   | 4.182283    | 4.182283    | 3.182283   | 654        | 863   | 371   |      |
|           |                                    |                                    |                                    |              |              |             |            |            |             |             |            |            |       |       |      |

|           |                                        |            |                                    |              |              |            |            |            |            |            |            |       |       |      |
|-----------|----------------------------------------|------------|------------------------------------|--------------|--------------|------------|------------|------------|------------|------------|------------|-------|-------|------|
| 113174    | NM_138421                              | SAA1       | serum amyloid A like 1             | -1.486123602 | -2.197507631 | 63.12825   | 42.522762  | 26.99213   | 6.57161226 | 6.00739279 | 5.45374301 | 3695  | 3322  | 2068 |
| 113246    | NM_001301834.NM_001301836.C12orf57     |            | chromosome 12 open reading fra     | -1.392930419 | -2.198766744 | 93.932564  | 67.158202  | 39.784039  | 6.12246788 | 5.65243182 | 5.01031597 | 2696  | 2886  | 1508 |
| 143279    | NM_001284274.NM_001346365.HECTD2       |            | HECT domain E3 ubiquitin protei    | -1.499018034 | 5.150729     | 3.732555   | 2.849060   | 2.849060   | 4.54619271 | 4.02918937 | 4.54613381 | 491   | 804   | 498  |
| 65990     | NM_001271285.NM_0232033                | FAM1173A   | family with sequence similarity 17 | -1.378964414 | -2.199924415 | 32.884662  | 14.032207  | 14.032207  | 4.84989531 | 4.40518902 | 3.77118606 | 1093  | 1059  | 611  |
| 385851    | NM_001008401.NM_001289951.ZNF761       |            | zinc finger protein 761            | -1.85964868  | -2.199983241 | 13.302306  | 6.912835   | 6.944295   | 5.61808953 | 4.74787652 | 4.51532318 | 1889  | 1357  | 1056 |
| 145694    | NR_132969.NR_132970.NR_131LOC145694    |            | uncharacterized LOC145694          | -1.510966608 | -2.200186302 | 1.204524   | 0.8037     | 0.505473   | 1.67378945 | 1.29208824 | 0.99569924 | 86    | 76    | 48   |
| 9907      | NM_014855                              | AP5Z1      | adaptor related protein complex 1  | -1.19956702  | -2.201235951 | 9.869633   | 11.824323  | 5.045914   | 6.01235454 | 5.75428199 | 4.90056614 | 2495  | 2779  | 1394 |
| 729967    | NM_001145450                           | MORN2      | MORN repeat containing 2           | 1.213080008  | -2.201242725 | 19.242125  | 23.366986  | 8.020451   | 3.89793981 | 4.15996116 | 2.87112187 | 5495  | 885   | 305  |
| 630227    | NR_034380                              | SNORD104   | small nucleolar RNA, CID box 10    | -1.53084072  | -2.202795842 | 151.518472 | 86.20652   | 6.20652    | 3.12444388 | 6.53849923 | 2.66896823 | 464   | 405   | 236  |
| 5099      | NM_001175253.NM_002589.MPDC23          |            | protocadherin 7                    | -1.55012804  | -2.20282614  | 0.208042   | 0.144055   | 0.144055   | 1.0421304  | 1.04742631 | 0.75527104 | 27    | 56    | 16   |
| 414189    | NM_001077665                           | AGAP6      | ArfGAP with GTPase domain, an      | -1.770794744 | -2.203876724 | 27.77096   | 15.66538   | 11.812453  | 6.24429046 | 5.43444861 | 5.12691319 | 2937  | 2216  | 1639 |
| 10050538  | NR_038991                              | RBM26-AS1  | RBM26 antisense RNA 1              | -1.85693231  | -2.204518139 | 0.829696   | 0.555431   | 0.3549     | 1.59082596 | 1.23481109 | 0.93484595 | 79    | 71    | 44   |
| 135398    | NM_001145652.NR_146853.NR_C6orf141     |            | chromosome 6 open reading fra      | -1.340466362 | -2.204688856 | 27.226709  | 20.444764  | 13.307178  | 6.15892439 | 5.04240188 | 5.04240188 | 276   | 2757  | 1543 |
| 150274    | NM_001318314.NM_001318315.HSCB         |            | HscB mitochondrial iron-sulfur cl  | 1.206744093  | -2.204946833 | 20.219352  | 24.059137  | 8.690926   | 4.45698495 | 4.71683753 | 3.39306282 | 823   | 1327  | 459  |
| 641153    | NM_0021032                             | RNA5EH2C   | ribonuclease H2 subunit C          | 1.123257727  | -2.205493327 | 16.13743   | 18.137893  | 6.871198   | 5.48411762 | 5.6507905  | 4.3912499  | 1718  | 2563  | 958  |
| 136853    | NM_008744                              | SSOD       | scavenger receptor cysteine rich   | -1.092889162 | -2.205571764 | 0.335172   | 0.303909   | 0.142366   | 0.93882015 | 0.8787593  | 0.49997203 | 36    | 44    | 20   |
| 692106    | NR_003054                              | SNORD65    | small nucleolar RNA, CID box 65    | -1.299432371 | -2.209713368 | 25.529684  | 19.723911  | 10.865722  | 1.50279892 | 1.26944952 | 0.87055986 | 92    | 74    | 40   |
| 100113386 | NR_027287                              | UCKL1-AS1  | UCKL1 antisense RNA 1              | -1.397606517 | -2.210545106 | 0.466838   | 0.273065   | 1.7191395  | 1.40024122 | 1.02535867 | 70         | 86    | 50    |      |
| 9071      | NM_001160100.NM_008984.NMCLDN10        |            | claudin 10                         | -3.83728986  | -2.211575983 | 3.381908   | 0.878951   | 1.432218   | 3.20189991 | 2.23479744 | 322        | 112   | 179   |      |
| 101927572 | NM_001290056.NM_001347907.LOC101927572 |            | uncharacterized LOC101927572       | -1.048306737 | -2.211917523 | 6.013766   | 5.759936   | 2.54059    | 2.29192162 | 2.23796388 | 1.46482043 | 133   | 196   | 85   |
| 100286413 | NM_001242690.NM_024534                 | ERVHER34-1 | endogenous retrovirus group ME     | -1.767590224 | -2.212212017 | 1.589406   | 0.891967   | 0.689433   | 2.48150547 | 1.84504029 | 1.61867597 | 180   | 136   | 100  |
| 8876      | NM_004666                              | VNN1       | vanin 1                            | -1.974784267 | -2.214014287 | 7.357143   | 3.729187   | 3.123688   | 4.83591088 | 3.90250283 | 3.74913666 | 1082  | 732   | 601  |
| 6818      | NM_177552.NM_177552_dup1               | SULT1A3    | sulfotransferase family 1A memb    | -1.501554595 | -2.214342838 | 5.761425   | 8.665654   | 2.438865   | 3.14487866 | 3.67595308 | 2.18310266 | 308   | 618   | 171  |
| 63875     | NM_022061                              | MRPL17     | mitochondrial ribosomal protein L  | -1.644231444 | -2.214439016 | 73.32525   | 44.653465  | 7.40896365 | 3.121014   | 6.69699562 | 6.27226751 | 6633  | 5390  | 3684 |
| 121642    | NM_001001655.NM_001145374.ALKBH2       |            | alkB homolog 2, alpha-ketoglutar   | -1.402934008 | -2.214817665 | 37.534276  | 27.001781  | 15.85039   | 5.36078893 | 4.88636082 | 4.25549579 | 1574  | 1499  | 789  |
| 63940     | NM_001276501.NM_022107                 | GPSM3      | G protein signaling modulator 3    | -2.09030355  | -2.215072038 | 2.088751   | 0.898948   | 0.871969   | 2.01115992 | 1.29208264 | 1.24249651 | 19    | 76    | 66   |
| 809593    | NM_001328607.NM_014801                 | PCAD2      | pcanone homolog 2 (Drosophila)     | -1.91744445  | -2.216150342 | 8.058134   | 1.91474453 | 5.914633   | 5.914633   | 5.81523337 | 5.81523337 | 152   | 2519  | 861  |
| 280684    | NM_172006.NM_172131                    | WFDIC10B   | WAP four-disulfide core domain     | -1.31504971  | -2.218754406 | 1.19716    | 1.588365   | 0.498746   | 0.97979717 | 0.93782333 | 0.41288872 | 29    | 51    | 16   |
| 101928068 | NR_111907                              |            | uncharacterized LOC101928068       | -1.095109288 | -2.219697588 | 0.955366   | 1.047462   | 0.402235   | 2.46162969 | 2.56983975 | 1.59908545 | 177   | 259   | 98   |
| 3119      | NM_001243961.NM_002123                 | HLA-DOB1   | major histocompatibility complex,  | 2.350343168  | -2.220941032 | 0.310702   | 0.734314   | 0.129993   | 0.59399636 | 1.1381576  | 0.29607837 | 20    | 63    | 11   |
| 100132677 | NR_038866                              | BSN-AS2    | BSN antisense RNA 2 (head to h     | -1.333736392 | -2.220941032 | 0.20081    | 0.149054   | 0.076789   | 0.59399636 | 0.46599441 | 0.29607837 | 20    | 20    | 11   |
| 80868     | NR_001317                              | HCGB       | HLA complex group 4 (non-prot      | -2.448671182 | -2.220941032 | 0.074405   | 0.074405   | 0.053936   | 0.59399636 | 0.29607837 | 0.29607837 | 20    | 10    | 11   |
| 84515     | NM_001289111.NM_032194                 | 5PPT1      | lysosome production factor 1 non   | -1.7713352   | -2.22190694  | 13.77352   | 11.590501  | 5.81677    | 5.81677    | 5.41133761 | 4.48675901 | 54    | 294   | 1071 |
| 57407     | NM_001305141.NM_001305142.NMRAL1       |            | NmrA like redox sensor 1           | -1.076451256 | -2.223026698 | 35.778339  | 33.231737  | 14.993002  | 5.52299658 | 5.41910375 | 4.40823568 | 1766  | 2192  | 977  |
| 2120      | NM_00101987                            | ETV6       | ETS variant 6                      | -1.920129529 | -2.223139529 | 10.156171  | 9.292598   | 4.292634   | 5.90973571 | 4.7861128  | 4.99038671 | 2321  | 1615  | 1284 |
| 79918     | NM_001160305.NM_002460.NR.SETD6        |            | SET domain containing 6            | -1.092500769 | -2.224165273 | 7.778143   | 7.124635   | 3.285529   | 4.47576468 | 4.42580931 | 3.46747648 | 879   | 1075  | 486  |
| 283324    | NM_002251                              | CDC8B8     | coiled-coil domain containing 8B   | -2.000101747 | -2.225912169 | 5.568782   | 2.786577   | 2.348274   | 4.79148701 | 3.84241755 | 3.69940604 | 1048  | 700   | 579  |
| 79791     | NM_001282683.NM_024735                 | FAM3031    | F-box protein 31                   | -3.12205938  | -2.22601021  | 3.290302   | 3.500118   | 2.260357   | 6.42889657 | 4.41553369 | 5.27169332 | 359   | 373   | 1670 |
| 101927237 | NR_110747                              |            | uncharacterized LOC101927237       | -1.55946558  | -2.226690163 | 0.141824   | 0.223789   | 0.06017    | 0.35634914 | 0.52452456 | 0.16897038 | 10    | 23    | 6    |
| 102465435 | NR_106785                              | MIR6727    | microRNA 6727                      | -1.463112773 | -2.226690163 | 4.319699   | 3.011155   | 1.808534   | 0.35634914 | 0.25173066 | 0.16897038 | 11    | 10    | 6    |
| 5806      | NM_002852                              | PTX3       | pentraxin 3                        | -1.940543063 | -2.227407213 | 3.243529   | 6.312159   | 1.366535   | 2.83562844 | 3.69093766 | 1.90855849 | 241   | 625   | 133  |
| 162632    | NR_003190                              | USP32P1    | ubiquitin specific peptidase 32 ps | 2.297963392  | -2.228545844 | 0.265341   | 0.615683   | 0.109521   | 1.01352966 | 1.74192207 | 0.54161868 | 40    | 123   | 22   |
| 106374177 | NR_135546                              | LINC02029  | long intergenic non-protein codi   | -1.124081718 | -2.228844498 | 1.19193    | 1.067415   | 0.499565   | 1.46336426 | 1.3579479  | 0.83730224 | 69    | 38    | 38   |
| 79947     | NR_024516                              | PAGR1      | PAGR1 associated glutamate ric     | -2.02451622  | -2.228844498 | 24.184736  | 22.89108   | 10.057368  | 6.42889657 | 4.41553369 | 5.27169332 | 359   | 373   | 1670 |
| 102465502 | NR_106893                              | MIR6835    | microRNA 6835                      | -1.206439687 | -2.232823593 | 12.37462   | 15.050041  | 5.293921   | 0.83964007 | 0.96581954 | 0.43515728 | 31    | 50    | 17   |
| 221143    | NM_001318939.NM_174928.NR.EEF1AKMT1    |            | EEF1A lysine methyltransferase     | -1.140469787 | -2.234036113 | 4.401278   | 3.910198   | 1.84238    | 2.19091668 | 2.04488597 | 1.37552141 | 140   | 164   | 77   |
| 9839      | NM_001171653.NM_0014795.NR.ZEB2        |            | zinc finger E-box binding homeot   | 1.276161639  | -2.234161516 | 0.142528   | 0.183514   | 0.05963    | 1.2010231  | 1.41062362 | 0.65979727 | 51    | 87    | 28   |
| 148645    | NR_103354                              | LINC00337  | long intergenic non-protein codi   | -1.94088445  | -2.234161516 | 0.808656   | 0.416737   | 0.337225   | 1.2010231  | 0.73744528 | 0.65979727 | 51    | 35    | 28   |
| 141332    | NM_0010011712                          | LCN10      | lipocalin 10                       | -6.732801255 | -2.234161516 | 0.657381   | 0.097008   | 0.077183   | 1.2010231  | 0.25173066 | 0.65979727 | 51    | 10    | 28   |
| 91960     | NM_001031733.NM_001286661              | ATF1       | activator protein 1                | -1.131033328 | -2.23426501  | 5.424624   | 5.424624   | 4.85436283 | 4.85436283 | 4.85436283 | 4.85436283 | 1081  | 1013  | 595  |
| 55556     | NM_001126123.NM_001318759.ENO5F1       |            | enolase superfamily member 1       | -1.155262961 | -2.234898104 | 30.56177   | 34.44125   | 14.275583  | 6.88496951 | 5.7397392  | 5.7397392  | 4601  | 7102  | 2532 |
| 100293516 | NM_001204818                           | ZNF587B    | zinc finger protein 587B           | -1.196024363 | -2.236303447 | 13.171305  | 11.026269  | 5.531158   | 5.42542649 | 5.20242678 | 4.33314528 | 1682  | 1879  | 99   |
| 100506233 | NR_038903                              | RAB30-AS1  | RAB30 antisense RNA 1 (head t      | -1.045343183 | -2.236565959 | 17.11821   | 11.220328  | 4.907304   | 3.11973735 | 3.06324294 | 2.14982678 | 302   | 386   | 166  |
| 1119      | NM_001277.NM_212469                    | CHKA       | choline kinase alpha               | -1.122634752 | -2.237669992 | 39.019436  | 82.968088  | 39.035734  | 7.94553753 | 7.77936448 | 6.79074481 | 9639  | 11472 | 5298 |
| 100506076 | NR_103732.NR_103732_dup1.LOC100506076  |            | uncharacterized LOC100506076       | -1.86058563  | -2.238543504 | 1.718133   | 15.377714  | 0.679621   | 1.04948198 | 3.6629641  | 3.65199967 | 42    | 612   | 23   |
| 79918     | NM_001350526.NM_001350527.BRAT1        |            | BRCA1 associated ATM activato      | -1.28562071  | -2.238543504 | 24.819549  | 24.819549  | 2.451984   | 6.22026953 | 5.34417855 | 5.34417855 | 3769  | 3683  | 2054 |
| 201651    | NR_026915                              | ADACAP1    | arylsulfatase deacetylase pseu     | 1.334495709  | -2.239430507 | 5.802486   | 7.754285   | 2.425355   | 3.05045588 | 2.08792485 | 2.08792485 | 286   | 510   | 157  |
| 5705      | NM_001199163.NM_002805                 | PSMC5      | proteasome 26S subunit, ATPase     | -1.193528946 | -2.239776538 | 254.353367 | 213.198481 | 106.86674  | 8.40753107 | 8.15311728 | 7.24941912 | 13292 | 14880 | 7299 |
| 101928578 | NR_110410                              | RAP2C-AS1  | RAP2C antisense RNA 1              | -1.723018298 | -2.240625637 | 0.167408   | 0.096078   | 0.069631   | 0.64188297 | 0.4048891  | 0.32020933 | 22    | 17    | 12   |
| 387640    | NM_207371                              | SKIDA1     | SKIDA1 domain containing 1         | -1.223447592 | -2.240625637 | 0.085372   | 0.069304   | 0.035554   | 0.64188297 | 0.54351856 | 0.32020933 | 22    | 12    | 24   |
| 396333    | NR_007395                              | LOC100425P | family with sequence similarity 9f | -1.22059944  | -2.240625637 | 2.299438   | 1.220599   | 0.12115    | 0.70406985 | 0.29209837 | 0.29209837 | 22    | 336   | 203  |
| 10471     | NM_001185181.NM_001265595.PFDN6        |            | preludin subunit 6                 | -1.475704795 | -2.241168873 | 69.315447  | 89.315447  | 43.590407  | 5.99601418 | 5.41846082 | 4.83298524 | 2420  | 2191  | 1328 |
| 56954     | NM_020202                              | NIT2       | nitrilase family member 2          | 1.063391827  | -2.24250653  | 54.589897  | 57.584068  | 22.872358  | 6.09960764 | 6.17358599 | 4.96033821 | 2653  | 374   |      |

|           |                                     |              |                                      |              |              |            |            |            |            |             |            |      |       |      |
|-----------|-------------------------------------|--------------|--------------------------------------|--------------|--------------|------------|------------|------------|------------|-------------|------------|------|-------|------|
| 54922     | NM_017805                           | RASIP1       | Ras interacting protein 1            | -2.224333475 | -2.278488209 | 0.908893   | 0.407755   | 0.372553   | 1.97422731 | 1.21124797  | 1.19154816 | 115  | 69    | 62   |
| 285288    | NM_001098414.NM_001287425.ZNF621    |              | zinc finger protein 621              | -1.572629575 | -2.278497312 | 0.978678   | 0.978678   | 4.23532    | 6.42364978 | 5.25683459  | 5.25683459 | 3331 | 2830  | 1798 |
| 100616477 | NR_035954                           | MIR4442      | microRNA 4442                        | -2.463050374 | -2.282963826 | 0.595305   | 0.078209   | 0.174273   | 0.07168335 | 0.02724389  | 0.02957205 | 2    | 1     | 1    |
| 135458    | NM_145859                           | HUS1B        | HUS1 checkpoint clamp compon         | 2.992470179  | -2.282963826 | 0.050997   | 0.050997   | 0.149623   | 0.07168335 | 0.02747831  | 0.02957205 | 2    | 2     | 1    |
| 728945    | NM_001164262.NM_001164262.PPIAL4F   |              | peptidylprolyl isomerase A like 4f   | -2.463050374 | -2.282963826 | 0.041147   | 0.010490   | 0.025463   | 0.07168335 | 0.02724389  | 0.02957205 | 2    | 1     | 1    |
| 677840    | NR_003018                           | SNORA71D     | small nucleolar RNA, H/ACA box       | 2.537265386  | -2.282963826 | 0.317209   | 0.914123   | 0.106122   | 0.07168335 | 0.18071335  | 0.02957205 | 2    | 7     | 1    |
| 100847090 | NR_049819                           | MIS5187      | microRNA 5187                        | -1.313695475 | -2.282963826 | 0.417898   | 0.006944   | 0.015882   | 0.07168335 | 0.05398282  | 0.02957205 | 2    | 2     | 1    |
| 285985    | NR_003987                           | EPHA1-AS1    | EPHA1 antisense RNA 1                | 1.471633007  | -2.282963826 | 0.01038    | 0.015631   | 0.003965   | 0.07168335 | 0.10601836  | 0.02957205 | 2    | 4     | 1    |
| 101603551 | NM_001291464.NM_001291464.TBC1D3C   |              | TBC1 domain family member 3K         | -2.463050374 | -2.282963826 | 0.02103    | 0.008645   | 0.009679   | 0.07168335 | 0.02724389  | 0.02957205 | 2    | 1     | 1    |
| 102465985 | NR_107057.NR_107057_dup1            | MIR7112      | microRNA 7112                        | -1.313695475 | -2.282963826 | 0.65287    | 0.55381    | 0.296402   | 0.07168335 | 0.05398282  | 0.02957205 | 2    | 2     | 1    |
| 106635682 | NR_132979                           | SNORD140     | small nucleolar RNA, CID box 14      | -1.313695475 | -2.282963826 | 0.352918   | 0.230303   | 0.046865   | 0.07168335 | 0.05398282  | 0.02957205 | 2    | 2     | 1    |
| 7152      | NR_001283                           | TOP1P2       | topoisomerase (DNA) I pseudogi       | -1.313695475 | -2.282963826 | 0.021571   | 0.025809   | 0.00165    | 0.07168335 | 0.05398282  | 0.02957205 | 2    | 2     | 1    |
| 100419868 | NR_051997                           | ZNF33BP1     | zinc finger protein 33B pseudoge     | 1.471633007  | -2.282963826 | 0.042264   | 0.0475     | 0.015506   | 0.07168335 | 0.10601836  | 0.02957205 | 2    | 4     | 1    |
| 100500854 | NR_037443                           | MIR3671      | microRNA 3671                        | -1.313695475 | -2.282963826 | 0.314948   | 0.264648   | 0.161921   | 0.07168335 | 0.05398282  | 0.02957205 | 2    | 2     | 1    |
| 100616214 | NR_035958                           | MIR4793      | microRNA 4793                        | -2.463050374 | -2.282963826 | 0.304706   | 0.265992   | 0.179305   | 0.07168335 | 0.02724389  | 0.02957205 | 2    | 1     | 1    |
| 102465434 | NR_035813                           | MIR4667      | microRNA 4667                        | -2.463050374 | -2.282963826 | 0.61616    | 0.113211   | 0.281863   | 0.07168335 | 0.02724389  | 0.02957205 | 2    | 1     | 1    |
| 102465434 | NR_106784                           | MIR6726      | microRNA 6726                        | -1.313695475 | -2.282963826 | 0.664541   | 0.50746    | 0.02271    | 0.07168335 | 0.05398282  | 0.02957205 | 2    | 2     | 1    |
| 102465468 | NR_106839                           | MIR6781      | microRNA 6781                        | -2.463050374 | -2.282963826 | 0.469478   | 0.234937   | 0.250472   | 0.07168335 | 0.02724389  | 0.02957205 | 2    | 1     | 1    |
| 102465536 | NR_106950                           | MIR6890      | microRNA 6890                        | -2.463050374 | -2.282963826 | 0.734065   | 0.184926   | 0.106069   | 0.07168335 | 0.02724389  | 0.02957205 | 2    | 1     | 1    |
| 102465985 | NR_106957                           | MIR7107      | microRNA 7107                        | 1.471633007  | -2.282963826 | 0.375583   | 0.793283   | 0.192956   | 0.07168335 | 0.10601836  | 0.02957205 | 2    | 4     | 1    |
| 102466737 | NR_108851                           | MIR8793      | microRNA 8793                        | -1.313695475 | -2.282963826 | 0.444039   | 0.576065   | 0.276437   | 0.07168335 | 0.05398282  | 0.02957205 | 2    | 2     | 1    |
| 219927    | NM_181514.NM_181515                 | MRPL21       | mitochondrial ribosomal protein L    | -1.137350058 | -2.28296687  | 122.551278 | 107.872044 | 50.36796   | 6.93599007 | 6.21267709  | 5.22683144 | 3267 | 3838  | 1760 |
| 282808    | NM_001031834                        | RAB40A       | RAB40A, member RAS oncogen           | -1.13294958  | -2.283997511 | 0.355936   | 0.27593    | 0.143283   | 0.04682716 | 0.36283659  | 0.22116494 | 15   | 15    | 8    |
| 284904    | NM_001161368.NM_174977              | SEC14L4      | SEC14 like lipid binding 4           | 3.838243788  | -2.284075211 | 0.33537    | 0.117572   | 0.132848   | 0.77668602 | 1.90501868  | 0.39027104 | 28   | 144   | 15   |
| 442454    | NR_002308                           | UQCRCBP1     | ubiquinol-cytochrome c reductas      | -1.288626097 | -2.284075211 | 0.908204   | 0.700936   | 0.363651   | 0.77668602 | 0.63409036  | 0.39027104 | 28   | 29    | 15   |
| 7561      | NM_021030                           | ZNF14        | zinc finger protein 14               | -1.941264928 | -2.284101119 | 5.059463   | 2.609463   | 3.96536087 | 3.96255698 | 2.88736461  | 2.88736461 | 574  | 979   | 309  |
| 6958      | NM_001280788.NM_001280788           | surfeit 4    | surfeit 4                            | 1.291814554  | 1.773177     | 23.0984574 | 23.0984574 | 7.75818377 | 7.75818377 | 6.20784528  | 6.20784528 | 4611 | 11204 | 3521 |
| 147657    | NM_001297624.NM_001297625.ZNF480    |              | zinc finger protein 480              | -2.2856625   | -2.2856625   | 0.579697   | 0.220494   | 2.081648   | 3.98818428 | 3.49195907  | 3.49195907 | 921  | 780   | 495  |
| 1102      | NM_001268.NM_001286830.NMRCBT82     |              | RCC1 and BTB domain containi         | 1.370004277  | -2.288951607 | 1.093926   | 1.495951   | 0.444507   | 2.15835987 | 2.52275889  | 1.32870978 | 136  | 249   | 73   |
| 4682      | NM_001278506.NM_001323594.NUBP1     |              | nucleotide binding protein 1         | -1.211221807 | -2.289336704 | 37.012185  | 30.733932  | 15.227696  | 5.47505833 | 5.20541148  | 4.32123795 | 1707 | 1883  | 917  |
| 387496    | NM_001331126.NM_206827              | RASL11A      | RAS like family 11 member A          | 1.30919948   | -2.289950208 | 1.003665   | 1.233379   | 0.376825   | 1.27890673 | 1.52015496  | 0.69713258 | 56   | 98    | 30   |
| 51427     | NM_001013746.NM_001283359.ZNF107    |              | zinc finger protein 107              | -1.488024426 | -2.290004655 | 16.217552  | 11.44723   | 6.816615   | 6.816615   | 5.86648449  | 5.23874944 | 3305 | 3008  | 1775 |
| 94045     | NM_001330453.NM_032646.NM1TYX2      |              | twelve family member 2               | -1.193049627 | -2.161616    | 0.978328   | 1.449587   | 0.290224   | 0.978328   | 1.51        | 1.51       | 159  | 159   | 159  |
| 9641      | NM_001193321.NM_001193322.IKBKE     |              | inhibitor of nuclear factor kappa B  | 1.23563895   | -2.290818256 | 4.886201   | 6.40409    | 2.009003   | 4.11070049 | 4.39908757  | 3.0185082  | 639  | 1055  | 82   |
| 134637    | NM_001286259.NM_182503              | ADAT2        | adenosine deaminase, tRNA spe        | -2.086704232 | -2.29134783  | 7.556125   | 3.661349   | 3.158142   | 4.7324405  | 4.60276393  | 2.096      | 1342 | 1435  | 1435 |
| 6817      | NM_01055.NM_177529.NM_17SULT1A1     |              | subfollotransferase family 1A memb   | 1.115054527  | -2.292749897 | 15.116552  | 16.323956  | 6.446322   | 4.48351009 | 4.63397275  | 3.36725759 | 839  | 1250  | 450  |
| 400960    | NR_033872                           | PCBP1-AS1    | PCBP1 antisense RNA 1                | 1.49612117   | -2.293234386 | 0.778163   | 1.164945   | 0.315433   | 1.48977343 | 1.89025622  | 0.83750224 | 173  | 142   | 38   |
| 101612    | NM_00100905.NM_001320755            | UHRF1        | UHRF1-likeNucleicAcid beta-1.3-N     | 0.419437     | -2.293234386 | 10.176593  | 4.911857   | 1.234368   | 3.96845518 | 2.3150407   | 2.3150407  | 1171 | 779   | 629  |
| 348526    | NR_130740.NR_130741.NR_13FAM86EP    |              | family with sequence similarity 8f   | -1.087390517 | -2.29444235  | 4.398935   | 5.782448   | 2.309062   | 3.62762016 | 3.73910482  | 2.57277436 | 446  | 648   | 239  |
| 26817     | NR_000019                           | SNORD34      | small nucleolar RNA, CID box 34      | -1.384484666 | -2.29568619  | 56.164719  | 40.594112  | 22.731928  | 2.02592365 | 1.85267538  | 1.36396013 | 142  | 137   | 76   |
| 3787      | NM_001322799.NM_002251              | KCNK51       | potassium voltage-gated channel      | -3.150462734 | -2.295717959 | 0.78824    | 0.247951   | 0.320778   | 2.41415945 | 1.24644988  | 1.52834475 | 170  | 72    | 91   |
| 728489    | NM_001080849.NR_073565              | DNLZ         | DNL-type zinc finger                 | -1.178457258 | -2.298344324 | 16.968439  | 14.460928  | 6.923291   | 3.7418939  | 3.5240591   | 2.67455554 | 486  | 551   | 260  |
| 100527850 | NR_037633.NR_037634.NR_03GJAP-MYCBP |              | GJAP-MYCBP readthrough               | -1.013593309 | -2.305635776 | 0.884696   | 0.787527   | 0.326478   | 1.86964268 | 1.68318474  | 0.98063788 | 88   | 116   | 47   |
| 100529261 | NM_001202558.NM_001202559           | CHURC1-FNTB  | CHURC1-FNTB readthrough              | -2.290515624 | -2.300126252 | 2.874775   | 1.11188    | 1.97527    | 2.78956622 | 2.78956622  | 2.78956622 | 239  | 239   | 239  |
| 8515      | NM_001303040.NM_001303041.ITGA10    |              | integrin subunit alpha 10            | -5.908341745 | -2.300511593 | 0.300504   | 0.558528   | 0.125077   | 0.47625981 | 1.95552917  | 2.98115841 | 623  | 151   | 333  |
| 84125     | NM_001079910                        | LRR1Q1       | leucine rich repeats and IQ motif    | 1.510604388  | -2.302920484 | 0.501616   | 0.760659   | 0.202545   | 1.87753473 | 2.33383942  | 1.11084509 | 415  | 212   | 56   |
| 401541    | NM_001012267.NM_001286969           | CENPP        | centromere protein P                 | -1.424587847 | -2.304632544 | 3.484908   | 2.261199   | 1.307478   | 3.54187697 | 3.08285145  | 2.4901017  | 108  | 392   | 223  |
| 677842    | NR_002995                           | SNORA50C     | small nucleolar RNA, H/ACA box       | -1.224396859 | -2.305487924 | 15.062258  | 12.236968  | 6.018948   | 1.56621863 | 1.37924953  | 0.88680889 | 77   | 84    | 41   |
| 84946     | NM_001329953.NM_0032860             | LTV1         | LTV1 ribosome biogenesis factor      | -1.074445033 | -2.305635776 | 32.327032  | 30.814794  | 13.442333  | 5.98011746 | 5.87822158  | 4.80404514 | 2439 | 3033  | 1301 |
| 111444    | NM_00105354                         | SLC18A1      | sodium channel sperm associated      | -1.141610184 | -2.30717616  | 1.99844    | 1.277418   | 0.92401    | 2.71249458 | 2.61038762  | 1.91825158 | 229  | 268   | 126  |
| 9132      | NM_004700.NM_172163                 | KCNQ4        | potassium voltage-gated channel      | -2.914459594 | -2.308669324 | 0.594281   | 0.242388   | 0.242388   | 1.76310734 | 0.86372326  | 1.02535867 | 94   | 43    | 50   |
| 339977    | NM_01024611                         | LRRC66       | leucine rich repeat containing 66    | -1.110677759 | -2.310315947 | 0.967754   | 0.391788   | 2.07360076 | 2.19057252 | 1.25551497  | 1.25551497 | 126  | 187   | 67   |
| 106736475 | NR_133914                           | PCF11-AS1    | PCF11 antisense RNA 1                | 1.290176776  | -2.310549718 | 3.326277   | 4.29881    | 2.88122939 | 3.20419534 | 1.90855849  | 2.50       | 431  | 133   | 431  |
| 5008      | NM_001319108.NM_0020530             | OSM          | oncostatin M                         | -1.128476299 | -2.311002168 | 0.623737   | 0.548219   | 0.253528   | 1.07428646 | 0.62147005  | 0.62147005 | 49   | 58    | 26   |
| 145957    | NM_138573                           | NRG4         | neuregulin 4                         | -1.534893724 | -2.317205677 | 1.196361   | 0.776124   | 0.480513   | 1.82664439 | 1.41063262  | 1.06873498 | 100  | 87    | 53   |
| 79837     | NM_001146258.NM_001146259           | PHF21C       | phosphatidylinositol-5-phosphate     | -1.39903831  | -2.317434498 | 18.13658   | 12.948955  | 6.53816745 | 5.35816745 | 5.35816745  | 5.35816745 | 129  | 243   | 68   |
| 9154      | NM_001287761.NM_001287762.SLC28A1   |              | solute carrier family 28 member 1    | -1.366413383 | -2.318693703 | 0.222926   | 0.427214   | 0.0719     | 0.56944351 | 0.906581954 | 0.27153692 | 19   | 50    | 10   |
| 7023      | NM_003223                           | TFAP4        | transcription factor AP-4            | -1.079613316 | -2.321912301 | 10.518494  | 11.371551  | 4.252831   | 4.51920371 | 4.62508404  | 3.38452672 | 861  | 1242  | 456  |
| 728833    | NM_001345942.NM_207418.NR FAM72D    |              | family with sequence similarity 7; D | 1.133140051  | -2.321977948 | 0.983299   | 1.165355   | 0.375095   | 1.47662927 | 1.59489542  | 0.82068496 | 70   | 106   | 70   |
| 1416      | NR_033733.NR_033734                 | CRYBBP21     | crystallin beta B2 pseudogene        | -1.133782485 | -2.322359688 | 8.955163   | 8.115885   | 3.76927    | 3.80635139 | 3.63890064  | 2.72060965 | 510  | 601   | 270  |
| 100775104 | NR_026710.chX.NR_026710.ca3X        | KLHL7-AS1    | KLHL7 antisense RNA 1 (head t        | -1.0452220   | -2.32593581  | 0.725827   | 0.459718   | 0.295108   | 1.11294744 | 1.50379224  | 72         | 61   | 36    | 61   |
| 79612     | NM_001110798.NM_018527.NMNA16       |              | N(alpha)-acetyltransferase 16, N     | -1.270653304 | -2.326477174 | 9.118005   | 7.515113   | 3.806307   | 5.19411105 | 4.85913858  | 4.02716981 | 1398 | 1470  | 739  |
| 100506497 | NR_038965                           | LOC100506497 | uncharacterized LOC100506497         | -1.335744355 | -2.328635488 | 0.894462   | 0.670221   | 0.361049   | 2.0823043  | 1.25551499  | 1.25551499 | 127  | 127   | 127  |
| 100129361 | NM_001271592                        | SMIM10L1     | small integral membrane protein      | -1.38012484  | -2.33        |            |            |            |            |             |            |      |       |      |

|           |                                     |                 |                                       |              |              |            |            |            |             |             |             |       |       |       |
|-----------|-------------------------------------|-----------------|---------------------------------------|--------------|--------------|------------|------------|------------|-------------|-------------|-------------|-------|-------|-------|
| 684959    | NR_003028                           | SNORA25         | small nucleolar RNA, H/ACA box        | -1.704927985 | -2.360251279 | 42.976154  | 25.198441  | 16.979231  | 2.70647097  | 2.08433212  | 1.73991364  | 217   | 170   | 113   |
| 26809     | NR_000014                           | SNORA24A        | small nucleolar RNA, CID box 42       | -1.508817593 | -2.361809499 | 21.396082  | 8.403049   | 12.1691895 | 0.90836632  | 0.64076093  | 0.64076093  | 52    | 46    | 27    |
| 91801     | NR_001301010.NM_138775              | ALKBH8          | alkB homolog 8, tRNA methyltr         | -1.341334645 | -2.362233824 | 6.555951   | 4.901597   | 4.75384679 | 4.3482657   | 3.58458975  | 3.58458975  | 1020  | 1016  | 531   |
| 342132    | NM_001004309                        | ZNF744          | zinc finger protein 774               | -1.273321492 | -2.363497892 | 1.450977   | 1.134307   | 0.5683     | 1.84721644  | 1.28973408  | 1.28973408  | 102   | 107   | 63    |
| 112464    | NM_145040                           | CAVIN3          | caveolin associated protein 3         | -1.52628817  | -2.364255927 | 45.629261  | 29.918404  | 18.13175   | 5.55695676  | 4.96243097  | 4.3566691   | 1809  | 1498  | 1583  |
| 2395      | NM_000144.NM_001161706.NMFXN        |                 | frataxin                              | 1.060204028  | -2.365468797 | 4.140437   | 4.280076   | 4.5509035  | 4.6317557   | 3.39023607  | 3.39023607  | 881   | 1248  | 948   |
| 130576    | NM_001317002.NM_001317003.LYPD6B    |                 | LY6/PLAUR domain containing 6         | 7.315384361  | -2.365712158 | 0.066197   | 0.49401    | 0.13997292 | 0.81765451  | 0.0585501   | 0.0585501   | 4     | 4     | 2     |
| 25928     | NM_015464                           | SOSTDC1         | sclerostin domain containing 1        | 4.399653266  | -2.365712158 | 0.05599    | 0.251291   | 0.13997292 | 0.54351866  | 0.0585501   | 0.0585501   | 4     | 24    | 2     |
| 10369740  | NR_067866                           | LINC01792       | long intergenic non-protein codin     | 1.666155364  | -2.365712158 | 0.045108   | 0.081225   | 0.2284445  | 0.0585501   | 0.0585501   | 0.0585501   | 4     | 9     | 2     |
| 100923464 | NR_145807                           | SNORA119        | small nucleolar RNA, H/ACA box        | 1.666155364  | -2.365712158 | 0.723105   | 1.16944    | 0.16492    | 0.13997292  | 0.2284445   | 0.0585501   | 102   | 130   | 63    |
| 100302185 | NR_031609                           | MIR1204         | microRNA 1204                         | 1.848388558  | -2.365712158 | 1.287381   | 2.858992   | 0.404669   | 0.13997292  | 0.25173066  | 0.0585501   | 4     | 10    | 2     |
| 102466223 | NR_106964                           | MIR7114         | microRNA 7114                         | -1.74595434  | -2.365712158 | 1.358807   | 0.6904     | 0.528824   | 0.13997292  | 0.08023518  | 0.0585501   | 4     | 3     | 2     |
| 692208    | NR_030373                           | SNORD91B        | small nucleolar RNA, CID box 91       | 1.483922171  | -2.365712158 | 1.108376   | 1.780529   | 0.15265    | 0.13997292  | 0.20477631  | 0.0585501   | 4     | 8     | 2     |
| 102465521 | NR_106924                           | MIR6864         | microRNA 6864                         | -4.801002825 | -2.365712158 | 1.369119   | 0.250912   | 0.396807   | 0.13997292  | 0.02724389  | 0.0585501   | 4     | 1     | 2     |
| 2032      | NM_000115.NM_001114753.MMENG        |                 | endoglin                              | 1.080965012  | 0.738242     | 0.263765   | 0.738242   | 1.61510261 | 1.69172362  | 0.90287695  | 0.90287695  | 81    | 117   | 42    |
| 9310      | NM_004234                           | ZNF235          | zinc finger protein 235               | -1.45503638  | -2.368059402 | 2.205706   | 2.204444   | 2.270822   | 3.45407101  | 2.97154911  | 2.97154911  | 391   | 359   | 203   |
| 100048912 | NR_003529.NR_047532.NR_04CDKN2B-AS1 |                 | CDKN2B antisense RNA 1                | 1.155291814  | -2.368685781 | 1.289915   | 2.52467    | 0.688658   | 2.34351507  | 2.5131555   | 1.4430085   | 160   | 247   | 83    |
| 100131454 | NR_024120                           | DBILP5          | diazepam binding inhibitor-like 5,    | -1.149954210 | -2.37118268  | 0.267157   | 0.10297    | 0.83964067 | 0.75384785  | 0.41288872  | 0.41288872  | 31    | 36    | 16    |
| 389125    | NM_205853                           | MUSTN1          | musculoskeletal, embryonic nucle      | -1.223270745 | -2.373665708 | 3.102941   | 2.547606   | 1.6852613  | 1.4910792   | 0.95003448  | 0.95003448  | 87    | 95    | 45    |
| 7786      | NM_001193511.NM_006301              | MAFK12          | mitogen-activated protein kinase      | -1.03381344  | -2.374230687 | 3.231756   | 3.146      | 3.63355401 | 3.58946269  | 2.53718654  | 2.53718654  | 448   | 579   | 232   |
| 85371     | NR_048312                           | KIAA1656        | KIAA1656 protein                      | 1.134471603  | -2.375128189 | 1.844629   | 2.095657   | 3.87558202 | 4.04593672  | 2.75842286  | 2.75842286  | 537   | 814   | 278   |
| 100302652 | NM_001164165                        | GPR75-ASB3      | GPR75-ASB3 readthrough                | -2.158793129 | -2.377171576 | 6.933938   | 3.210681   | 2.738881   | 3.8375314   | 2.83945493  | 2.72006095  | 522   | 323   | 207   |
| 100287932 | NM_006327.NR_073029.NR_07TIMM23     |                 | translocase of inner mitochondria     | -1.552061852 | -2.377863724 | 95.988027  | 61.908887  | 6.85292913 | 3.9757091   | 6.85293052  | 5.62030952  | 4499  | 3873  | 2320  |
| 10528     | NM_006392.NR_027700.NR_14NOP56      |                 | NOP56 ribonucleoprotein               | 1.430268331  | -2.378668921 | 209.33807  | 298.95096  | 83.924498  | 8.77103249  | 9.25887863  | 7.5254108   | 17112 | 13204 | 8848  |
| 100132247 | NM_001135865                        | NP1PB5          | nuclear pore complex interacting      | -1.170860044 | -2.381181864 | 229.268387 | 196.05198  | 90.481094  | 9.73611483  | 9.50904853  | 8.48676495  | 33443 | 38169 | 17274 |
| 58486     | NM_001143667.NM_021211              | ZBED5           | zinc finger BED-type containing 5     | -1.309530347 | -2.381758544 | 56.868188  | 50.498736  | 26.059689  | 7.46473982  | 7.07820918  | 6.22392145  | 6896  | 7036  | 3561  |
| 100325239 | NR_121647                           | LINC01414       | long intergenic non-protein codin     | 1.1281347    | -2.38704392  | 1.870439   | 1.967533   | 1.125867   | 1.28433466  | 2.122493266 | 2.122493266 | 116   | 163   | 44    |
| 100131998 | NR_027460                           | RNRP33          | RRN3 homolog, RNA polymeras           | 1.229302844  | -2.384801473 | 3.054824   | 3.495798   | 1.202156   | 3.0726447   | 3.33804373  | 2.20378728  | 291   | 478   | 150   |
| 389170    | NM_001004316.NM_001193283.LEKR1     |                 | leucine, glutamate and lysine ric     | -1.375668878 | -2.386643999 | 1.307525   | 0.989639   | 0.49602    | 1.8573935   | 1.5392062   | 1.06873498  | 103   | 100   | 53    |
| 388389    | NM_001258395.NM_001258396.CDC103    |                 | coiled-coil domain containing 103     | 1.204181148  | -2.389461475 | 3.656374   | 4.387487   | 2.84588727 | 3.07960182  | 1.84344662  | 1.84344662  | 243   | 391   | 125   |
| 374887    | NM_001190328.NM_198537              | YJFN3           | YjF N-terminal domain containir       | 1.01176958   | -2.392522669 | 11.062549  | 11.342524  | 4.533354   | 3.58538547  | 3.60087125  | 2.84477392  | 432   | 584   | 222   |
| 7307      | NM_001025203.NM_001025204.UZF1      |                 | Uzf small nuclear RNA auxiliary f     | 1.133564687  | -2.394653067 | 133.081721 | 151.061804 | 52.223276  | 6.96570757  | 7.14521738  | 5.72173543  | 4868  | 7373  | 2500  |
| 100374704 | NM_001256860                        | USP17-19        | ubiquitin specific peptidase 17-1     | 0.064111909  | -2.39571909  | 0.093609   | 0.39571909 | 0.15625959 | 0.15625959  | 0.0848153   | 0.0848153   | 6     | 6     | 3     |
| 102465510 | NR_106906                           | MIR6847         | microRNA 6847                         | -1.586572606 | -2.39571909  | 2.177291   | 1.38103    | 0.768669   | 0.20517559  | 0.13134883  | 0.08695753  | 6     | 5     | 3     |
| 2516      | NM_004959                           | NR5A1           | nuclear receptor subfamily 5 gr       | -2.596168628 | -2.39571909  | 0.050633   | 0.015452   | 0.012917   | 0.20517559  | 0.08023518  | 0.08695753  | 6     | 3     | 3     |
| 102466759 | NR_106954                           | MIR6894         | microRNA 6894                         | 1.61071536   | -2.39571909  | 2.631124   | 4.351376   | 1.024338   | 0.20517559  | 0.31941552  | 0.08695753  | 6     | 13    | 3     |
| 109623467 | NR_145809                           | SNORD150        | small nucleolar RNA, CID box 15       | -3.807641671 | -2.39571909  | 1.782075   | 0.406265   | 0.624682   | 0.20517559  | 0.05396282  | 0.08695753  | 6     | 2     | 3     |
| 290336    | NM_147196                           | TMIE            | transmembrane inner ear               | -1.014509098 | -2.398013793 | 0.642191   | 0.632176   | 0.1678443  | 1.11294744  | 0.9516944   | 0.5016944   | 49    | 49    | 24    |
| 100874362 | NR_102279                           | HOXB-AS1        | HOXB cluster antisense RNA 1          | -1.038635638 | -2.400664474 | 13.520243  | 13.025579  | 5.288279   | 3.52282116  | 3.47265962  | 2.42438178  | 412   | 530   | 211   |
| 11151     | NM_001193333.NM_007074              | CORO1A          | coronin 1A                            | -1.082263328 | -2.403799783 | 4.413466   | 0.085322   | 1.72847    | 3.14071816  | 3.04002433  | 2.08792485  | 307   | 379   | 125   |
| 139065    | NM_001184749.NM_001184750.SLITRK4   |                 | SLIT and NTRK like family memt        | -66.47102214 | -2.405458917 | 1.219711   | 0.017938   | 0.471412   | 3.50026652  | 2.02477631  | 2.40240201  | 405   | 8     | 207   |
| 26797     | NR_002742                           | SNORD52         | small nucleolar RNA, CID box 52       | -2.208533519 | -2.405713376 | 39.173111  | 17.494081  | 15.291146  | 1.78459878  | 1.07428646  | 1.01065171  | 96    | 58    | 49    |
| 653125    | NM_001282493                        | GOLGA8K         | golgin A8 family member K             | -1.030988643 | -2.408793542 | 0.48399    | 0.47904    | 1.909092   | 1.80577475  | 1.77444288  | 1.02535867  | 98    | 127   | 50    |
| 100127391 | NR_110894                           | LCO161-01927391 | characterized LOC101927391            | -1.271596131 | -2.407831462 | 0.48399    | 0.47904    | 1.909092   | 1.80577475  | 1.77444288  | 1.02535867  | 98    | 127   | 50    |
| 101927559 | NR_125739                           | CEBPB-AS1       | CEBPB antisense RNA 1                 | -2.017676306 | -2.410751186 | 0.498354   | 0.549157   | 1.194642   | 1.29382453  | 1.137024953 | 0.6785857   | 84    | 29    | 84    |
| 285407    | NR_073386.NR_073387.NR_07ALG1L9P    |                 | asparagine-linked glycosylation 1     | 2.136545619  | -2.411222525 | 0.107853   | 0.297065   | 0.050348   | 0.26755841  | 0.52452456  | 0.1148164   | 57    | 8     | 4     |
| 23630     | NM_012282                           | KCNK5           | potassium voltage-gated channel       | 1.121023635  | -2.411222525 | 0.142295   | 0.160122   | 0.05308    | 0.26755841  | 0.29720487  | 0.1148164   | 8     | 23    | 4     |
| 645967    | NR_134652                           | LOC645967       | uncharacterized LOC645967             | -1.763306246 | -2.411222525 | 0.16354    | 0.092091   | 0.062555   | 0.26755841  | 0.15624221  | 0.1148164   | 8     | 6     | 4     |
| 109623456 | NR_145806                           | SNORD167        | small nucleolar RNA, CID box 16       | -1.763306246 | -2.411222525 | 2.229444   | 1.363149   | 0.883498   | 0.26755841  | 0.15624221  | 0.1148164   | 8     | 6     | 4     |
| 83451     | NM_003342                           | HIST1H4C        | histone cluster 1 H4 like family memt | -1.161447192 | -2.411222525 | 5.508747   | 0.3428671  | 0.197247   | 0.26755841  | 0.18071335  | 0.1148164   | 8     | 7     | 4     |
| 343521    | NM_001013632                        | TCTEX1D4        | Tcte1 domain containing 4             | 2.690461792  | -2.411222525 | 0.162079   | 0.433762   | 0.048531   | 0.26755841  | 0.63409036  | 0.1148164   | 8     | 29    | 4     |
| 647190    | NR_046241                           | RPS16P5         | ribosomal protein S16 pseudogen       | -3.446393706 | -2.411222525 | 0.066273   | 0.012414   | 0.025255   | 0.26755841  | 0.08023518  | 0.1148164   | 8     | 3     | 4     |
| 677848    | NR_004395                           | SNORD1A         | small nucleolar RNA, CID box 1A       | -1.184729479 | -2.411222525 | 2.499217   | 2.328905   | 0.903938   | 0.26755841  | 0.2284445   | 0.1148164   | 8     | 9     | 4     |
| 693220    | NR_030365                           | MIR635          | microRNA 635                          | -1.516447292 | -2.411222525 | 1.963814   | 1.265451   | 0.718915   | 0.26755841  | 0.18071335  | 0.1148164   | 8     | 7     | 4     |
| 10260414  | NR_104791                           | C2-AS1          | C2 antisense RNA 1                    | 1.95106894   | -2.411222525 | 0.264235   | 0.522399   | 0.086536   | 0.26755841  | 0.48576948  | 0.1148164   | 8     | 21    | 4     |
| 102465450 | NR_108910                           | microRNA 6752   | microRNA 6752                         | 1.213351972  | -2.411222525 | 1.820362   | 3.344817   | 0.905897   | 0.26755841  | 0.31941552  | 0.1148164   | 8     | 13    | 4     |
| 109616999 | NR_145771                           | SNORA80D        | small nucleolar RNA, H/ACA box        | -2.614531255 | -2.411222525 | 1.388022   | 0.575038   | 0.077901   | 0.26755841  | 0.10601836  | 0.1148164   | 8     | 4     | 4     |
| 100616371 | NR_039901                           | MIR4746         | microRNA 4746                         | -1.067926637 | -2.411222525 | 2.827358   | 2.495646   | 0.95607    | 0.26755841  | 0.25173066  | 0.1148164   | 8     | 10    | 4     |
| 1608      | NM_001080744.NM_001080745.DGKG      |                 | diacylglycerol kinase gamma           | -1.159659189 | -2.411228926 | 1.600131   | 1.380466   | 0.62248    | 3.32800968  | 3.1370039   | 2.2474368   | 355   | 409   | 181   |
| 4026      | NM_001167671.NM_001167672.LPP       |                 | LIM domain containing preferred       | 1.123716013  | -2.411265826 | 5.994566   | 6.568182   | 2.316137   | 6.71177345  | 6.87858624  | 5.4612224   | 4076  | 6120  | 2079  |
| 100670321 | NR_040023                           | ERVAK13-1       | endogenous retrovirus group K1;       | -1.67847767  | -2.411695863 | 0.927799   | 0.927799   | 0.39842467 | 1.612247074 | 1.172247074 | 0.9516944   | 1759  | 1671  | 59    |
| 5582      | NM_001316329.NM_002739              | PRKCG           | protein kinase C gamma                | -7.472487098 | -2.413108662 | 6.94955    | 9.823878   | 2.730952   | 4.47527325  | 1.94127715  | 3.2599602   | 634   | 149   | 425   |
| 83694     | NM_031464                           | RPS6KL1         | ribosomal protein S6 kinase like      | -1.088389246 | -2.414167006 | 0.837797   | 0.772609   | 0.325959   | 2.39332696  | 2.29513766  | 1.46482043  | 267   | 205   | 85    |
| 3790      | NM_001282428.NM_002252              | KCN53           | potassium voltage-gated channel       | 1.44698239   | -2.415393119 | 2.458826   | 3.640339   | 0.953333   | 2.75626978  | 3.22198991  | 1.75769337  |       |       |       |

|           |                           |                     |                                    |              |              |             |             |            |             |             |             |       |       |      |
|-----------|---------------------------|---------------------|------------------------------------|--------------|--------------|-------------|-------------|------------|-------------|-------------|-------------|-------|-------|------|
| 400512    | NR_037184                 | FLJ21408            | uncharacterized LOC0400512         | -2.642881282 | -2.435134406 | 0.691712    | 0.25222     | 0.237026   | 0.49317359  | 0.20477631  | 0.22116494  | 16    | 8     | 8    |
| 3428      | NM_001206567.NM_005531    | IFIH6               | interferon gamma inducible protein | -1.534088797 | -2.435213107 | 16.214673   | 24.909969   | 6.249405   | 5.46511016  | 6.07177486  | 4.22706077  | 1695  | 3476  | 856  |
| 27086     | NM_00112505.NM_001244808  | FOXP1               | forkhead box P1                    | -1.818472921 | -2.43584369  | 1.68639     | 0.912723    | 0.777518   | 2.78861701  | 2.78861701  | 2.435544243 | 422   | 310   | 213  |
| 57507     | NM_020747                 | ZNF608              | zinc finger protein 608            | 2.182289419  | -2.43763198  | 1.606743    | 3.513643    | 0.61619    | 3.28843463  | 3.28843463  | 2.20918158  | 347   | 1012  | 175  |
| 10900     | NM_001144825.NM_001144826 | RUNC3A              | RUN domain containing 3A           | 1.57606203   | -2.437841396 | 0.369134    | 0.073547    | 0.436995   | 0.54446555  | 0.7861039   | 0.24657076  | 18    | 38    | 9    |
| 101929901 | NR_135817                 | LOC101929901        | uncharacterized LOC101929901       | -1.092589253 | -2.437841396 | 1.19387     | 1.075725    | 0.436995   | 0.54446555  | 0.50527715  | 0.24657076  | 18    | 22    | 9    |
| 102465667 | NR_106660                 | MIR7110             | microRNA 7110                      | -1.086500607 | -2.440014352 | 5.803912    | 5.483759    | 2.098699   | 0.50399366  | 0.56226574  | 0.27153692  | 20    | 25    | 10   |
| 146183    | NM_001161683.NM_144672    | NMOTAP              | otomycin                           | -1.270654647 | -2.440014352 | 0.144866    | 0.111111    | 0.049832   | 0.59399636  | 0.48576948  | 0.27153692  | 20    | 21    | 10   |
| 636       | NM_1997173                | BGLAP               | bone gamma-carboxylglutamate g     | -1.270654647 | -2.440014352 | 0.075491    | 0.548345    | 0.25232    | 0.59399636  | 0.48576948  | 0.27153692  | 20    | 21    | 10   |
| 4830      | NM_002069.NM_198175       | NME1                | NME1/NME2 nucleoside diphosph      | 1.566217594  | -2.441777921 | 565.516811  | 412.995044  | 0.61619    | 8.81990771  | 8.3708861   | 7.53056724  | 17703 | 17313 | 8917 |
| 51315     | NM_001304526.NM_010618    | KRC1C               | lysine rich coiled-coil 1          | 1.054756002  | -2.441861694 | 19.855204   | 20.961661   | 7.619464   | 5.17389443  | 5.24873326  | 3.94225731  | 13703 | 1942  | 6174 |
| 89837     | NR_026859.NR_026859_dup1  | ULK4P3              | ULK4 pseudogene 3                  | -1.87898076  | -2.443286129 | 0.528097    | 0.287399    | 0.208655   | 0.68823103  | 0.4048891   | 0.30209033  | 24    | 17    | 12   |
| 353322    | NM_181726                 | ANKRD37             | ankyrin repeat domain 37           | -1.004895807 | -2.443922294 | 4.964553    | 4.940176    | 1.899497   | 2.47491059  | 2.46913115  | 1.51794971  | 17    | 238   | 90   |
| 54857     | NM_001171191.NM_001171192 | GDPD2               | glycerophosphodiester phospho      | -1.507245721 | -2.444548467 | 0.269463    | 0.183758    | 0.099661   | 0.73313634  | 0.52452466  | 0.34394329  | 26    | 23    | 13   |
| 100532732 | NR_037846                 | MSH5-SAPCD1         | MSH5-SAPCD1 readthrough (NM        | -1.319532078 | -2.446550232 | 17.945385   | 17.944444   | 6.892337   | 6.16862681  | 5.77502267  | 4.90655538  | 2765  | 2620  | 1400 |
| 100289019 | NR_033374                 | SLC25A25-AS1        | SLC25A25 antisense RNA 1           | -1.2334244   | -2.44724542  | 11.234244   | 10.86006    | 5.149107   | 5.6774542   | 5.38133225  | 4.42841333  | 1970  | 2134  | 900  |
| 2752      | NM_001033044.NM_001033056 | GLUL                | glutamate-ammonia ligase           | 1.636702447  | -2.447605326 | 11.441929   | 18.413693   | 4.298676   | 6.46333709  | 7.16777213  | 5.19537587  | 3425  | 7490  | 1721 |
| 677810    | NR_003016                 | SNORA26             | small nucleolar RNA, H/ACA box     | -1.969112676 | -2.448124664 | 7.176198    | 3.574487    | 0.89996265 | 0.52452456  | 0.43515728  | 0.34769902  | 34    | 23    | 17   |
| 8418      | NR_002174.NR_027626       | CMAHP               | cytidine monophospho-N-acetyl      | -1.948758035 | -2.449352168 | 0.40167     | 0.152029    | 0.97665845 | 0.50877243  | 0.47868902  | 0.47868902  | 38    | 26    | 19   |
| 100130111 | NR_135221                 | LOC100130111        | uncharacterized LOC100130111       | -1.161344012 | -2.449874488 | 0.396164    | 0.341964    | 0.154794   | 1.01352966  | 0.90836632  | 0.49997027  | 40    | 46    | 20   |
| 23639     | NM_001321961.NM_001321962 | LRC6C               | leucine rich repeat containing 6   | 6.863528855  | -2.450347387 | 0.24516     | 2.04823     | 0.116464   | 1.0948188   | 3.06324294  | 0.52049563  | 42    | 386   | 21   |
| 10369     | NM_006078                 | CACNG2              | calcium voltage-gated channel a    | 1.317157603  | -2.451170556 | 0.252063    | 0.333203    | 0.094982   | 1.11880553  | 1.34717796  | 0.56199697  | 46    | 81    | 23   |
| 11227     | NM_001329868.NM_014568    | GALNT5              | polypeptide N-acetylgalactosami    | -1.1621916   | -2.452018744 | 5.60048     | 1.345072    | 2.144246   | 5.85745527  | 3.87652288  | 4.59907035  | 2237  | 718   | 1122 |
| 103344928 | NR_145481                 | KIAA1614-AS1        | KIAA1614 antisense RNA 1           | -1.021855903 | -2.45216911  | 0.935558    | 0.94994     | 0.345828   | 1.21691895  | 1.23481109  | 0.62147005  | 52    | 71    | 26   |
| 101927989 | NR_136504                 | LOC101927989        | uncharacterized LOC101927989       | -2.181263766 | -2.4524529   | 1.170037    | 0.533608    | 0.444968   | 1.24819466  | 0.70406985  | 0.64076093  | 54    | 33    | 27   |
| 64386     | NM_002448                 | MPM25               | matrix metalloproteinase 25        | -1.749368991 | -2.452716519 | 0.4110891   | 0.717779    | 0.156662   | 1.27880673  | 1.80624674  | 0.65979727  | 56    | 131   | 28   |
| 100129534 | NM_000576                 | IL1B                | Interleukin 1 beta                 | 6.030791442  | -2.453191175 | 1.03073     | 1.03073     | 0.396242   | 1.35814852  | 3.36429152  | 0.70406985  | 131   | 488   | 65   |
| 101927021 | NR_024489                 | LOC100129534        | small nuclear ribonucleoprotein p  | -2.193237777 | -2.455688841 | 1.1058      | 1.383748    | 0.421514   | 1.78459878  | 2.00116974  | 0.95969924  | 96    | 159   | 48   |
| 400745    | NR_110065.NR_110066       | NR_111.LOC101927021 | uncharacterized LOC101927021       | -1.036407036 | -2.457449302 | 1.918063    | 1.775473    | 0.706376   | 2.38631541  | 2.34470901  | 1.4430085   | 166   | 214   | 83   |
| 400745    | NM_001103160.NM_001103161 | SHZD5               | SHZ domain containing 5            | -2.108200702 | -2.458621342 | 2.192908    | 1.041801    | 0.836478   | 3.20189991  | 2.2895231   | 2.11576522  | 322   | 204   | 161  |
| 7552      | NM_001330574.NM_021998    | ZNF711              | SUZ12 polycomb repressive cor      | -1.105585171 | -2.459093776 | 3.107055    | 2.888948    | 1.186157   | 3.82721276  | 3.69306567  | 2.66986823  | 51    | 628   | 259  |
| 444023    | NR_024187.NR_144393       | NR_14-SUZ12P1       | long intergenic non-protein codin  | -1.13906473  | -2.461197619 | 20.806952   | 20.995669   | 12.503335  | 5.51030823  | 5.34005262  | 4.09167567  | 1581  | 2343  | 775  |
| 151009    | NR_022724                 | LINC001106          | long intergenic non-protein codin  | -1.09439712  | -2.46140669  | 15.99717005 | 15.99717005 | 5.99717005 | 1.04022422  | 1.04022422  | 0.96986823  | 151   | 120   | 54   |
| 51373     | NM_0015969                | MRPS17              | mitochondrial ribosomal protein S  | -1.533595871 | -2.462857566 | 67.667534   | 44.178371   | 25.808996  | 5.30608931  | 4.70844643  | 4.05799054  | 1514  | 1319  | 756  |
| 29015     | NM_001278201.NM_001278206 | SLC43A3             | solute carrier family 43 member 3  | 1.102732064  | -2.466186008 | 44.167779   | 49.163215   | 17.304926  | 6.89150985  | 7.03146276  | 5.60688496  | 4622  | 6810  | 2305 |
| 55272     | NM_018285                 | IMP3                | IMP3, U3 small nucleolar ribonuc   | -1.19070151  | -2.466504038 | 33.83353    | 38.515282   | 14.477945  | 5.81435314  | 5.56740891  | 4.54889714  | 217   | 895   | 1082 |
| 440335    | NM_001253790.NM_001253791 | SMIM22              | small integral membrane protein    | -1.189790371 | -2.468654701 | 81.334063   | 28.581707   | 12.921236  | 4.17486912  | 3.20501631  | 7.970       | 790   | 845   | 397  |
| 84856     | NR_026827                 | LINC00839           | Wnt family member 3                | -2.3434268   | -2.473702691 | 5.269428    | 2.3944116   | 0.44972    | 4.25736671  | 4.35911681  | 3.91111112  | 686   | 410   | 160  |
| 221806    | NM_001135924.NM_001346972 | WVDE                | long intergenic non-protein codin  | -2.780286794 | -2.476424655 | 1.415189    | 0.374991    | 0.53355    | 2.0646444   | 0.89363826  | 1.91591456  | 125   | 45    | 62   |
| 613037    | NM_001321892              | NP1P13              | von Willebrand factor D and EGF    | -2.104087018 | -2.477467653 | 2.367238    | 2.602836    | 0.901658   | 3.88307318  | 3.9370293   | 3.71151569  | 540   | 751   | 288  |
| 79877     | NM_001128631.NM_001288654 | DCAKD               | nuclear pore complex interacting   | -1.34016915  | -2.478534971 | 26.544374   | 19.831169   | 10.062375  | 6.67124425  | 6.25362362  | 5.38247699  | 3962  | 3950  | 1966 |
| 6637      | NM_001317165.NM_001317166 | SNRPG               | dephospho-CoA kinase domain c      | -1.07765802  | -2.480457691 | 18.104041   | 16.859912   | 6.86426    | 5.22194666  | 5.11073786  | 3.96730515  | 1426  | 1768  | 707  |
| 50125288  | NM_001317165.NM_001317166 | SNRPG               | small nuclear ribonucleoprotein p  | -1.135769536 | -2.483581511 | 178.445488  | 156.810451  | 68.063298  | 6.81524744  | 6.63331653  | 5.52165373  | 4382  | 5155  | 2170 |
| 3336      | NM_002157                 | HSPE1               | PCU class 6 homeobox A pseudoge    | -1.52846219  | -2.4884808   | 1.528462    | 0.44972     | 0.44972    | 1.94842012  | 1.80120704  | 1.80120704  | 243   | 150   | 120  |
| 29960     | NM_013393                 | MRM2                | zinc finger, GATA-like family 1    | -1.164317497 | -2.492431479 | 2.865731    | 1.071428    | 0.255789   | 2.70647067  | 2.52275889  | 1.6852207   | 217   | 249   | 107  |
| 503639    | NR_110526.NR_110526_dup1  | DUXAP01             | heat shock protein family E (Hsp   | -1.19402015  | -2.493268699 | 399.272919  | 37.3476593  | 150.478668 | 8.53713011  | 8.28205419  | 7.22486298  | 14545 | 16276 | 7175 |
| 50125288  | NM_0013393                | MRM2                | mitochondrial RNA methyltransf     | -1.347353146 | -2.495893418 | 37.167747   | 27.619143   | 13.9938    | 5.88134087  | 5.45966616  | 4.599783705 | 2275  | 2256  | 1121 |
| 503639    | NR_110526.NR_110526_dup1  | DUXAP01             | long intergenic non-protein codin  | -1.533304556 | -2.496127826 | 3.415563    | 2.233318    | 1.283322   | 2.99441778  | 2.42883124  | 1.88448459  | 264   | 230   | 130  |
| 50125288  | NM_0013393                | MRM2                | double homeobox A pseudogene       | -1.522144943 | -2.49642752  | 6.819042    | 0.950171    | 0.228859   | 1.29387258  | 1.68318474  | 0.65979727  | 58    | 27    | 28   |
| 89870     | NM_00133229               | TRIM15              | Oral, heat shock protein family (l | -1.333336031 | -2.49816137  | 1.953731    | 1.33333603  | 0.287741   | 1.125603457 | 1.178503457 | 1.178503457 | 124   | 108   | 116  |
| 131076    | NM_001017928.NM_001308326 | CDC58               | tripartite motif containing 15     | -1.272188604 | -2.498062179 | 1.401671    | 1.108996    | 0.529684   | 2.02024271  | 1.76538114  | 1.51176086  | 120   | 126   | 59   |
| 64983     | NM_00131903               | MRPL32              | colleed-coil domain containing 58  | -1.174788951 | -2.498218568 | 44.376527   | 52.098235   | 16.629778  | 5.01136367  | 5.23711295  | 3.75578721  | 1227  | 1926  | 604  |
| 978       | NM_001785                 | CDA                 | mitochondrial ribosomal protein L  | -1.480721468 | -2.499061787 | 123.102776  | 83.235962   | 46.289368  | 6.75392153  | 6.19401545  | 5.45237894  | 4198  | 3788  | 2066 |
| 146523    | NM_001300838.NM_001300839 | CIART               | cytidine deaminase                 | -2.636475322 | -2.499720159 | 110.936958  | 42.124126   | 110.936958 | 6.70861485  | 5.33242022  | 5.40732977  | 4067  | 2061  | 2061 |
| 825       | NM_00100701.NM_001254786  | AP12                | circadian associated repressor of  | -2.943131498 | -2.501053139 | 7.120616    | 2.382555    | 3.213593   | 3.71416279  | 2.35649733  | 2.54744438  | 476   | 214   | 234  |
| 257044    | NM_001130957.NM_001242340 | CATSPERE            | catpser channel auxiliary subunit  | -1.176911159 | -2.501589431 | 1.267439    | 1.920483    | 0.542601   | 1.96909694  | 1.80296899  | 1.80296899  | 41    | 172   | 54   |
| 5145      | NM_000440                 | PDE6A               | catpser channel auxiliary subunit  | -1.541058771 | -2.502485537 | 0.612295    | 0.612295    | 0.149126   | 1.16869631  | 1.16869631  | 0.58209675  | 49    | 101   | 24   |
| 255027    | NM_001128423.NM_173803    | MPV17L              | phosphodiesterase 6A               | -3.203876195 | -2.510950169 | 0.190102    | 0.058463    | 0.070101   | 1.03161781  | 0.4048891   | 0.49997203  | 41    | 17    | 20   |
| 9610      | NM_004292                 | RINI                | MPV17 mitochondrial inner mem      | -1.298449887 | -2.511083319 | 1.57146     | 1.224585    | 0.594694   | 2.18284609  | 1.89765633  | 1.26797492  | 139   | 143   | 68   |
| 71154     | NM_001128126.NM_001254786 | AP12                | Ras and Rab interactor 1           | -1.69284416  | -2.511109999 | 8.518406    | 14.437543   | 3.186403   | 4.53989763  | 5.27383102  | 3.30211189  | 874   | 1977  | 428  |
| 645166    | NR_027354.NR_027355       | NR_021              | adaptor related protein complex -  | -1.205329521 | -2.514261298 | 0.019474    | 0.267439    | 0.149126   | 1.16869631  | 1.16869631  | 0.58209675  | 49    | 101   | 24   |
| 100303453 | NR_028393.NR_028394       | NR_021              | lymphocyte-specific protein 1 pax  | -1.325330792 | -2.518023944 | 0.651808    | 0.96043     | 0.34039    | 2.38631541  | 2.72348335  | 1.42066173  | 166   | 294   | 81   |
| 3754      | NM_002236                 | KCNF1               | potassium voltage-gated channel    | -1.577801922 | -2.519       |             |             |            |             |             |             |       |       |      |

|           |                                      |              |                                     |              |              |            |            |             |            |            |            |      |      |
|-----------|--------------------------------------|--------------|-------------------------------------|--------------|--------------|------------|------------|-------------|------------|------------|------------|------|------|
| 375189    | NM_199346                            | PFN4         | profilin family member 4            | -1.175536684 | -2.571846789 | 1.69664266 | 1.5392062  | 0.90287695  | 88         | 100        | 42         |      |      |
| 286380    | NM_199135                            | FOXDL3       | forkhead box D4-like 3              | -1.336111753 | -2.572438706 | 0.222645   | 0.080571   | 0.44594451  | 0.24657076 | 9          | 9          |      |      |
| 6915      | NM_001060.NM_201636                  | TBXA2R       | thromboxane A2 receptor             | -6.162566948 | 0.026769     | 0.086631   | 0.05694361 | 0.10601836  | 0.24657076 | 19         | 4          |      |      |
| 645332    | NR_024249                            | FAM86C2P     | family with sequence similarity 81  | 1.593044093  | 0.055117     | 5.882959   | 3.49701545 | 4.32205519  | 2.32103228 | 404        | 860        |      |      |
| 3557      | NM_000577.NM_001318914.NM.1.RN       | IL1RN        | interleukin 1 receptor antagonist   | -1.994058483 | -2.576043984 | 3.240711   | 1.18336    | 2.71208982  | 1.9196316  | 218        | 146        |      |      |
| 65981     | NM_001022559.NM_001206856            | CAPRIN2      | caprin family member 2              | -1.228016503 | -2.576839927 | 51.445159  | 41.913164  | 18.989759   | 7.48485447 | 8588       | 9344       |      |      |
| 43847     | NM_001311182.NM_002046               | KLK14        | kallikrein related peptidase 14     | -2.040799564 | -2.577866228 | 0.496155   | 1.01352966 | 0.58077243  | 0.47868902 | 40         | 26         |      |      |
| 602204    | NR_003069                            | SNORD88C     | small nucleolar RNA, C/D box 88     | -1.442747653 | -2.577886228 | 10.726738  | 7.444894   | 1.01352966  | 0.47868902 | 40         | 37         |      |      |
| 54913     | NM_017793                            | RPRP2        | ribonuclease P and MRP subunit      | -1.274689949 | -2.57849386  | 10.5841267 | 13.18847   | 5.56944697  | 4.18654121 | 1743       | 1827       |      |      |
| 80723     | NM_001097599.NM_001097600            | SLC35G2      | solute carrier family 35 member 1   | 1.882922329  | -2.57978674  | 3.35611    | 4.44184742 | 5.32345051  | 3.17255882 | 2048       | 388        |      |      |
| 594839    | NR_002436                            | SNORA33      | small nucleolar RNA, H/ACA box      | -1.296806272 | -2.581660313 | 32.566727  | 25.178736  | 2.38631541  | 2.09080288 | 166        | 171        |      |      |
| 85016     | NM_001195005.NM_003290               | C11orf70     | chromosome 11 open reading fr       | -1.380580569 | -2.583714981 | 5.220102   | 1.950143   | 2.97950117  | 2.22204636 | 372        | 360        |      |      |
| 283131    | NR_028272.NR_131012                  | NEAT1        | nuclear paraspeckle assembly t      | 1.063375169  | -2.586154715 | 498.906794 | 817.00481  | 11.61734912 | 9.51339803 | 74130      | 164752     |      |      |
| 10128782  | NR_023389.NR_023390                  | LINC00476    | long intergenic non-protein codin   | 1.38120231   | -2.588922525 | 0.254449   | 0.428887   | 1.013276    | 1.90501868 | 0.82068496 | 78         | 144  |      |
| 440345    | NM_001301148                         | NP1P4        | nuclear pore complex interacting    | -1.291074108 | -2.588277348 | 60.828139  | 47.241115  | 22.120417   | 7.91404152 | 9430       | 9759       |      |      |
| 400566    | NM_001013672                         | C17orf97     | chromosome 17 open reading fr       | 1.184472839  | -2.59168711  | 0.509711   | 0.603122   | 0.175627    | 0.93882051 | 1.06116572 | 57         | 17   |      |
| 163688    | NM_001330313.NM_138705               | CALML6       | calmodulin like 6                   | -3.325193715 | -2.593330502 | 1.325544   | 0.374547   | 1.26358189  | 0.50527715 | 0.62147005 | 52         | 26   |      |
| 221883    | NR_002795                            | HOXA11-AS    | HOXA11 antisense RNA                | -1.097711498 | -2.593478348 | 2.561464   | 2.33091    | 2.28439817  | 2.17847216 | 1.31675654 | 155        | 125  |      |
| 254173    | NM_001130045.NM_153254               | TTL10        | tubulin tyrosine ligase like 10     | -1.525803014 | -2.598087709 | 0.83972    | 0.294194   | 1.50279892  | 0.76902392 | 72         | 63         |      |      |
| 105274304 | NR_130916                            | LINC05274304 | uncharacterized LOC105274304        | -1.009484534 | -2.599825091 | 0.513706   | 0.508901   | 0.89996265  | 0.89363826 | 0.41288872 | 34         | 45   |      |
| 400236    | NR_036500                            | FOXN3-AS1    | FOXN3 antisense RNA 1               | 1.210041678  | -2.599825091 | 0.188915   | 0.994884   | 0.296764    | 1.03456085 | 0.41288872 | 34         | 55   |      |
| 57586     | NM_001247987.NM_0020826              | SYT13        | synaptotagmin 13                    | -1.19474519  | -2.599825091 | 0.184232   | 0.137243   | 0.058985    | 0.89996265 | 0.41288872 | 34         | 38   |      |
| 105371795 | NR_135646                            | LOC105371795 | uncharacterized LOC105371795        | -2.012024204 | -2.600617418 | 19.30464   | 9.606355   | 5.30423048  | 4.33197089 | 3.9825058  | 1512       | 1004 |      |
| 54149     | NM_001100420.NM_001100421            | C21orf91     | chromosome 21 open reading fr       | 1.412134509  | -2.600872191 | 1.986193   | 0.506841   | 3.07682646  | 3.5240591  | 1.94780992 | 292        | 551  |      |
| 26821     | NR_002915                            | SNORA74A     | small nucleolar RNA, H/ACA box      | -1.443807002 | -2.603979718 | 1.929718   | 0.46682716 | 0.63409036  | 0.19530369 | 0.19530369 | 15         | 24   |      |
| 101927278 | NR_134451.NR_134452.NR_134502        | LOC101927278 | uncharacterized LOC101927278        | 1.19690193   | -2.603979718 | 0.367468   | 0.483327   | 0.46682716  | 0.54351856 | 0.19530369 | 15         | 24   |      |
| 29765     | NR_0151353                           | TMO2D4       | topomodulin 4                       | -1.851725232 | -2.606868215 | 0.745094   | 0.606925   | 1.44897615  | 0.95186619 | 0.95186619 | 68         | 32   |      |
| 28802     | NR_002746                            | SNORD47      | small nucleolar RNA, C/D box 47     | -1.421051043 | -2.608358709 | 494.287262 | 348.0787   | 177.830367  | 4.76909222 | 3.92602428 | 1455       | 1368 |      |
| 102724826 | NR_126465.NR_126466.NR_1212NF337-AS1 | ZNF337       | ZNF337 antisense RNA 1              | 1.02050874   | -2.609273273 | 0.656202   | 2.549146   | 2.92543304  | 2.95035633 | 1.81825156 | 259        | 353  |      |
| 414328    | NM_001001551.NM_001256915            | IDNK         | IDNK, glucokinase                   | 1.104896053  | -2.609795741 | 9.124093   | 9.724477   | 3.41670749  | 3.54777037 | 2.23479744 | 380        | 561  |      |
| 101929125 | NR_108989                            | LINC01730    | long intergenic non-protein codin   | -1.409435707 | -2.610525273 | 0.639427   | 0.408235   | 2.29192162  | 1.91234364 | 1.31675654 | 153        | 145  |      |
| 100507387 | NR_038402                            | LINC00507387 | uncharacterized LOC100507387        | 3.52262361   | -2.611404327 | 1.772748   | 6.284171   | 1.42282133  | 2.79259185 | 0.71544405 | 66         | 311  |      |
| 283131    | NR_028947                            | C1RL-AS1     | C1RL antisense RNA1                 | -1.099215223 | -2.611404327 | 1.980971   | 1.980971   | 1.23414049  | 1.64283691 | 1.23414049 | 68         | 34   |      |
| 100130283 | NR_147908                            | LOC100130283 | uncharacterized LOC100130283        | 1.07045004   | -2.620040597 | 2.223605   | 2.388064   | 0.782499    | 1.59082596 | 0.82068496 | 79         | 113  |      |
| 387103    | NM_001012507.NM_001286524            | CENPW        | centromere protein W                | 1.034646586  | -2.620924107 | 19.845703  | 20.373587  | 6.993736    | 4.54304361 | 3.24967672 | 876        | 1211 |      |
| 6007      | NM_017411.NM_017411_dup1             | ISMN2        | survival of motor neuron 2, centr   | -1.26232932  | -2.621599173 | 10.038774  | 5.918064   | 4.01847853  | 3.29385857 | 2.76523898 | 597        | 462  |      |
| 120376    | NM_001138105.NM_001271457            | COLCA2       | colorectal cancer associated 2      | -2.14406387  | -2.621748139 | 2.457814   | 1.139284   | 2.21486103  | 1.43116693 | 2.54598112 | 143        | 89   |      |
| 101047400 | NR_003716.NR_047517.NR_047518        | HOX          | HOX transcript antisense RNA        | -1.56220631  | -2.622542643 | 5.538855   | 3.965127   | 3.18617848  | 2.54247659 | 2.54247659 | 47         | 235  |      |
| 102654648 | NR_106806                            | MIR6748      | microRNA 6748                       | 1.15020119   | -2.627458332 | 4.73537    | 5.300173   | 1.644551    | 0.44264541 | 0.46599441 | 13         | 20   |      |
| 105458    | NR_026830                            | SATB2-AS1    | SATB2 antisense RNA 1               | -1.726570197 | -2.627458332 | 0.094673   | 0.058117   | 0.036167    | 0.41264541 | 0.25173066 | 0.16897038 | 13   | 10   |
| 2620      | NM_001143830.NM_001351224            | GAS2         | growth arrest specific 2            | -1.021559294 | -2.627458332 | 0.154342   | 0.142385   | 0.050582    | 0.41264541 | 0.4048891  | 13         | 17   |      |
| 101928402 | NR_130770                            | LOC101928402 | uncharacterized LOC101928402        | -1.332465618 | -2.627458332 | 0.759037   | 0.759037   | 0.132446    | 0.41264541 | 0.31941552 | 13         | 13   |      |
| 26249     | NM_001257194.NM_001257195            | KLHL3        | kelch like family member 3          | -1.085109876 | -2.632729136 | 2.607948   | 0.932021   | 4.23103553  | 4.23485452 | 2.95442604 | 698        | 1012 |      |
| 106833806 | NR_137258                            | SVNORD12     | snRNA                               | -1.05203865  | -2.632729136 | 50.411517  | 61.231463  | 17.972426   | 5.84756424 | 5.84756424 | 417        | 2968 |      |
| 100506472 | NR_040535                            | LOC100506472 | uncharacterized LOC100506472        | 1.43107988   | -2.635329145 | 3.175699   | 4.546899   | 1.127113    | 3.58843358 | 4.06096113 | 433        | 828  |      |
| 730102    | NR_037167                            | LOC730102    | quinone oxidoreductase-like prot    | -1.325217568 | -2.637193749 | 9.651415   | 7.29199    | 3.437261    | 4.85635215 | 4.46618624 | 1098       | 1107 |      |
| 27178     | NM_014439.NM_173202.NM_171L37        | IL1L37       | interleukin 37                      | 1.790834157  | -2.639374359 | 2.634137   | 0.865301   | 1.48977343  | 2.08433212 | 0.75138414 | 71         | 170  |      |
| 84842     | NR_003276                            | HPDL         | 4-hydroxyphenylpyruvate dioxy       | 2.708031802  | -2.640590551 | 1.86433    | 0.507409   | 2.09955541  | 3.30781222 | 1.16514558 | 537        | 467  |      |
| 677777    | NM_003010                            | SCARNA12     | small Cajal box-specific RNA 12     | -1.500891394 | -2.640959051 | 51.979103  | 34.631683  | 3.87598202  | 3.33804373 | 2.62698266 | 129        | 250  |      |
| 51171     | NM_001111307.NM_001111308            | SH2PDL       | shosphodiesterase 4A                | -1.49039564  | -2.642021916 | 1.807954   | 1.322861   | 1.76400038  | 2.77662653 | 2.64600038 | 331        | 307  |      |
| 728780    | NM_001276713                         | ANKKDB1      | ankyrin repeat and death domain     | 1.604817243  | -2.642153258 | 0.411541   | 0.60954    | 0.144797    | 1.03161781 | 1.42093184 | 0.47868902 | 41   | 88   |
| 84074     | NM_032134.NR_130649                  | GRICH2       | glutamine rich 2                    | -1.111770961 | -2.64409539  | 1.66946    | 1.502193   | 0.591243    | 3.27963753 | 3.14324318 | 342        | 411  |      |
| 85495     | NR_002312                            | RPPH1        | ribonuclease P RNA component        | 1.695507797  | -2.645946621 | 1.993182   | 3.351074   | 0.702819    | 0.73313634 | 1.08728891 | 0.32020933 | 26   | 59   |
| 100191040 | NM_001136003                         | C2CD4D       | C2 calcium dependent domain c       | -2.30351983  | -2.645946621 | 0.387371   | 0.170899   | 0.132273    | 0.73313634 | 0.36283659 | 0.32020933 | 26   | 12   |
| 151306    | NM_001077191.NM_001077194            | GPBAR1       | G protein-coupled bile acid recept  | 1.294156878  | -2.645946621 | 0.338862   | 0.546556   | 0.11489     | 0.73313634 | 0.89363826 | 0.32020933 | 26   | 45   |
| 100863306 | NR_132758                            | SH2PDL2      | small nucleolar RNA, C/D box 14     | -1.05203865  | -2.647527035 | 7.220751   | 7.811644   | 2.489526    | 1.59324892 | 1.59324892 | 54         | 29   |      |
| 117166    | NM_003284                            | WFKK1N1      | WAP, follistatin-like acid, immunog | -2.480651596 | -2.647527035 | 0.716515   | 0.284157   | 0.256523    | 1.24819466 | 0.63409036 | 0.60191771 | 54   | 25   |
| 1871      | NM_001243076.NM_0019149              | E2F3         | E2F transcription factor 3          | -1.224235483 | -2.649793666 | 14.673801  | 11.864427  | 4.641587    | 6.01235445 | 5.7254627  | 4.64278151 | 2495 | 2723 |
| 373863    | NM_194249                            | DND1         | DND microRNA-mediated repres        | -1.087846726 | -2.65429426  | 4.847152   | 4.46543    | 3.10272366  | 2.99588866 | 1.94780992 | 298        | 366  |      |
| 4621      | NM_002470                            | MYH3         | myosin heavy chain 3                | 1.653399344  | -2.655711984 | 1.279599   | 1.222663   | 0.452542    | 3.00414281 | 3.75141009 | 1.9400446  | 192  | 654  |
| 278781    | NR_002912                            | SNORA67      | small nucleolar RNA, H/ACA box      | -1.08201637  | -2.656478502 | 65.787323  | 38.385113  | 2.36270572  | 3.26270572 | 2.36270572 | 376        | 460  |      |
| 2874      | NM_004489                            | GPS2         | G protein pathway suppressor 2      | -1.06426265  | -2.658027793 | 31.294339  | 5.26654186 | 5.1792259   | 5.26654186 | 3.9167669  | 246        | 1848 |      |
| 29078     | NM_014165                            | NDUFAF4      | NADH:ubiquinone oxidoreductase      | -1.215355319 | -2.659456998 | 6.338866   | 5.217337   | 2.234726    | 3.98896023 | 3.72669368 | 584        | 642  |      |
| 654321    | NR_002921                            | SNORA75      | small nucleolar RNA, H/ACA box      | 1.070777816  | -2.661042471 | 24.678988  | 26.511837  | 2.10810423  | 2.18453503 | 1.16514558 | 130        | 186  |      |
| 285989    | NM_001013258.NM_001350999            | ZNF789       | zinc finger protein 789             | -1.255404883 | -2.662412854 | 11.01271   | 8.765565   | 4.32386849  | 4.01394871 | 3.02586351 | 747        | 795  |      |
| 100506540 | NR_038360                            | SPT2YD1-AS1  | SPT2YD1 antisense RNA 1             | -1.334131098 | -2.662653201 | 0.442284   | 0.317014   | 0.152894    | 0.68823103 | 0.54351856 | 0.29607837 | 24   | 24   |
| 728758    | NR_003571                            | PIMAP1       | peptidylprolyl isomerase            | 1.051704275  | -2.663425735 | 0.412051   | 0.428935   | 0.05786335  | 0.99371033 | 0.43515728 | 417        | 52   |      |
| 379013    | NR_001575                            | RNF138P1     | ring finger protein 138 pseudogen   | -1.410793995 | -2.663425735 | 0.189289   | 0.119489   | 0.056733    | 0.95786335 | 0.73744528 | 0.43515728 | 37   | 35   |
| 101928053 | NR_120540                            | LOC101928053 | uncharacterized LOC101928053        | -1.826605003 | -2.663425735 | 0.404452   | 0.225909   | 0.142897    | 0.95786335 | 0.59904473 | 37         | 27   |      |
| 6274      | NM_002960                            | S100A3       | S100 calcium binding protein A3     | 1.290785777  | -2.669282693 | 6.698926   | 8.649242   | 2.335156    | 2.53954085 | 1.4863075  | 189        | 326  |      |
| 51621     | NM_001302461.NM_015995               | KLFI3        | Kruppel like factor 13              | -1.53583851  | -2.66933839  | 2.238258   | 1.456575   | 3.98869623  | 3.4174117  | 2.716069   |            |      |      |

|           |                               |                |                                     |              |              |            |            |             |             |            |             |      |      |      |
|-----------|-------------------------------|----------------|-------------------------------------|--------------|--------------|------------|------------|-------------|-------------|------------|-------------|------|------|------|
| 1193      | NM_001289                     | CLIC2          | chloride intracellular channel 2    | 1.940895074  | -2.707036016 | 0.1941223  | 0.376342   | 0.059356    | 0.59399636  | 0.99371033 | 0.24657076  | 20   | 52   | 9    |
| 254042    | NM_001322278.NM_001322279     | METAP1D        | methionyl aminopeptidase type 1     | -1.050411502 | -2.707336941 | 9.250432   | 3.248268   | 4.87650783  | 4.80802022  | 3.52091369 |             | 1114 | 1417 | 506  |
| 100874343 | NR_046836                     | HS1BP3-IT1     | HS1BP3 intronic transcript 1        | 2.06630562   |              | 0.803796   | 0.803796   | 0.133255    | 0.56226574  | 0.148164   |             | 8    | 25   | 4    |
| 51733     | NM_016327                     | UPB1           | beta-ureidopropionase 1             | -5.678101318 | -2.708459898 | 0.101253   | 0.018223   | 0.030861    | 0.05308882  | 0.1148164  |             | 9    | 2    | 4    |
| 115948    | NM_001302453.NM_001302454     | CCDC151        | coiled-coil domain containing 151   | 2.805945345  | -2.708459898 | 0.108665   | 0.034059   | 0.036706    | 0.29776659  | 0.72085408 | 0.1148164   | 9    | 34   | 4    |
| 100500888 | NR_037505                     | MIR3940        | microRNA 3940                       | -1.002067138 | -2.708459898 | 2.163276   | 2.20399    | 0.679091    | 0.29776659  | 0.29720487 | 0.1148164   | 9    | 12   | 4    |
| 100329109 | NR_108060.NR_108061           | VIM-AS1        | VIM antisense RNA 1                 | -2.304087181 | -2.708695781 | 7.46427    | 3.212922   | 2.296081    | 3.45071403  | 2.40826008 | 2.22204636  | 390  | 226  | 177  |
| 3595      | NR_032348                     | GCSHP3         | glycine cleavage system protein 3   | 1.079232004  | -2.7118096   | 2.462786   | 2.673777   | 1.77389308  | 1.85267538  | 0.91876801 |             | 93   | 43   | 33   |
| 3225      | NM_001258214.NM_001258215     | 12SRB2         | HS1BP3 intronic transcript 1        | -1.258015176 | -2.713050719 | 0.455939   | 0.367368   | 1.314377176 | 1.314377176 | 0.75116748 |             | 73   | 78   | 33   |
| 375791    | NM_006987                     | HOCX3          | homeobox C9                         | -1.91004986  | -2.71380602  | 4.749259   | 2.4880564  | 1.840575    | 3.00540462  | 2.22627631 | 1.84344682  | 276  | 193  | 126  |
| 9404      | NM_199001                     | CYSRT1         | cysteine rich tail 1                | -1.452381658 | -2.716769351 | 15.094005  | 10.406156  | 5.221176    | 4.32753359  | 3.82117143 | 3.00368412  | 749  | 689  | 339  |
| 440603    | NM_001143995.NM_001307951     | LPXN           | leupaxin                            | -1.236711072 | -2.720722634 | 9.378796   | 7.764995   | 3.234175    | 4.22907737  | 3.94061606 | 2.9113909   | 697  | 753  | 315  |
| 56981     | NM_001010922                  | BCL2L15        | BCL2 like 15                        | -3.151899923 | -2.721500921 | 0.371684   | 0.116141   | 0.127464    | 1.48977343  | 0.65251278 | 0.7332601   | 71   | 30   | 32   |
| 50281     | NM_001256695.NM_001256696     | PRDM11         | PRSET domain 11                     | -1.07185932  | -2.725201951 | 0.3437     | 0.321507   | 0.249604    | 2.26692365  | 2.12902957 | 1.21478621  | 142  | 177  | 64   |
| 51022     | NR_002437                     | SNORD54        | small nucleolar RNA, C/D box 54     | -1.750532356 | -2.726576313 | 33.113773  | 16.834558  | 11.271082   | 1.602974    | 1.1294744  | 0.80366534  | 80   | 61   | 31   |
| 84524     | NM_001243399.NM_001319291     | GLRX2          | glutaredoxin 2                      | -1.583193448 | -2.731300068 | 21.714538  | 13.651516  | 7.381132    | 4.02077152  | 3.4174117  | 2.72513523  | 602  | 508  | 271  |
| 401233    | NM_032494                     | ZC3H8          | zinc finger CCHC-type containing    | 1.11460381   | -2.732410409 | 17.461899  | 19.488792  | 5.998059    | 4.8218676   | 4.97297796 | 3.64570395  | 1071 | 1595 | 482  |
| 7093      | NR_033884                     | HTATSF1P2      | HIV-1 Tat specific factor 1 pseud   | -1.710613948 | -2.737408195 | 0.089895   | 0.056255   | 0.034642    | 0.54446555  | 0.3412894  | 0.22116494  | 18   | 14   | 8    |
| 6036      | NM_012465                     | TLI2           | TLI2 like 2                         | 1.121926784  | -2.737408195 | 0.066323   | 0.077332   | 0.020664    | 0.59904473  | 0.22116494 |             | 8    | 27   | 8    |
| 494513    | NM_003095                     | SNRPF          | small nuclear ribonucleoprotein p   | -1.844707972 | -2.740270932 | 272.665649 | 147.983246 | 93.500587   | 7.72481517  | 6.84715638 | 6.28228282  | 8266 | 5987 | 3710 |
| 80162     | NM_001042702                  | DFNB59         | deafness, autosomal recessive 5     | -1.004131485 | -2.749123036 | 6.328378   | 6.309185   | 2.158103    | 3.37835054  | 3.37207385 | 2.1430785   | 369  | 491  | 165  |
| 84365     | NM_025092                     | PGGHG          | protein-glucosylglactosylhydrol     | -1.606171159 | -2.749309612 | 21.041142  | 13.115176  | 7.192688    | 6.08689616  | 5.41588625 | 4.66414547  | 2629 | 2187 | 1176 |
| 284992    | NM_032390                     | NIFK           | nuclear protein interacting with    | 1.147688249  | -2.749404401 | 65.004745  | 74.688667  | 22.209442   | 6.79454213  | 6.99160416 | 5.35791727  | 4319 | 6623 | 1932 |
| 81831     | NM_001080539                  | CCDC150        | coiled-coil domain containing 150   | -1.204972658 | -2.749560311 | 6.522272   | 5.415697   | 2.227152    | 4.60927912  | 4.35231081 | 3.24967672  | 919  | 1019 | 411  |
| 9540      | NM_001201477.NM_018092        | NETO2          | neuropilin and tolloid like 2       | -1.001288433 | -2.750676894 | 23.335256  | 23.335256  | 23.335256   | 6.40599143  | 6.42537125 | 4.97560227  | 3290 | 4456 | 1471 |
| 9540      | NM_001206802.NM_004881        | NMTPS33        | tumor protein p53 inducible prote   | 1.09897658   | -2.751076182 | 28.397495  | 30.06745   | 9.375499    | 5.63593514  | 5.7694873  | 4.22546494  | 1913 | 2809 | 855  |
| 8638      | NM_001200047.NM_001320510     | NMAT3          | nicotinamide nucleotide adenyllyl   | -2.055208427 | -2.752152334 | 0.461867   | 0.001101   | 0.119587    | 1.52971203  | 1.52971203 | 0.461867    | 36   | 90   | 16   |
| 728673    | NM_001261825.NM_003733        | NM0AS3         | Z'-5-oligoadenylate synthetase II   | -2.31710035  | -2.753786014 | 26.779751  | 20.77672   | 22.194114   | 5.703627524 | 5.10407662 | 5.59395302  | 5114 | 2178 | 2284 |
| 100379345 | NR_126047                     | LOC728673      | uncharacterized LOC728673           | 1.2034162    | -2.754371431 | 1.707668   | 2.062348   | 0.582621    | 2.25390578  | 2.46913115 | 1.2424651   | 148  | 238  | 66   |
| 23329     | NR_038975                     | MIR181A2HG     | MIR181A2 host gene                  | -1.036556336 | -2.755252893 | 1.893341   | 1.822485   | 0.619692    | 1.10178443  | 1.07428646 | 0.49997203  | 45   | 58   | 20   |
| 84467     | NM_001330186.NM_001330187     | TBC1D30        | TBC1 domain family member 30        | -4.319062674 | -2.756782011 | 3.06201    | 0.702369   | 1.033727    | 4.57894471  | 2.65526948 | 3.21791812  | 899  | 278  | 401  |
| 1078462   | NM_001024683.NM_145271        | FBN3           | fibrillin 3                         | -10.80446547 | -2.761282863 | 0.250654   | 0.020937   | 0.084781    | 1.7191395   | 0.27464663 | 0.87055586  | 90   | 11   | 40   |
| 127495    | NM_001256385.NM_001256386     | LRRCC39        | zinc finger protein 688             | -1.403116233 | -2.76258158  | 5.771361   | 3.905858   | 3.897558    | 3.897558    | 3.897558   | 3.897558    | 510  | 510  | 243  |
| 2171      | NM_001256385.NM_001256386     | LRRCC39        | leucine rich repeat containing 39   | -2.434748254 | -2.763302071 | 1.811601   | 0.75064    | 0.608965    | 2.15014056  | 1.16514558 | 1.16514558  | 135  | 74   | 60   |
| 84622     | NM_0010444                    | FABP5          | fatty acid binding protein 5        | 1.01917672   | -2.766917679 | 158.289383 | 161.480972 | 53.737955   | 6.82856444  | 6.85573047 | 5.38247699  | 4423 | 6023 | 1966 |
| 100533107 | NM_032350                     | ZNF594         | zinc finger protein 594             | 1.29386555   | -2.767528142 | 4.29212    | 5.738417   | 4.46199571  | 1.500051    | 4.81877967 | 3.10438964  | 426  | 1348 | 655  |
| 40616     | NR_037882                     | RTEL1-TNFRSF6B | RTEL1-TNFRSF6B readthrough          | -1.467298946 | -2.771206505 | 6.687186   | 4.562271   | 2.266279    | 5.27035534  | 3.86439381 |             | 1476 | 1424 | 87   |
| 259204    | NM_00105576                   | LOC107895544   | LOC107895544                        | -1.23542631  | -2.771256561 | 4.605011   | 4.605011   | 4.605011    | 4.605011    | 4.605011   | 4.605011    | 1102 | 1102 | 674  |
| 100500802 | NM_176888                     | TAS2R19        | taste 2 receptor member 19          | -1.043560549 | -2.773081244 | 0.649883   | 0.613991   | 0.219234    | 0.71085839  | 0.68708806 | 0.29607837  | 25   | 16   | 11   |
| 80763     | NR_037456                     | MIR3685        | microRNA 3685                       | -2.078057058 | -2.773081244 | 10.373434  | 5.03031    | 3.316481    | 0.71085839  | 0.38406669 | 0.29607837  | 25   | 16   | 11   |
| 349196    | NM_030572.NR_135187.NR_131SFX | SPX            | spexin hormone                      | 2.144069623  | -2.776290504 | 0.180277   | 0.390002   | 0.051716    | 0.49317359  | 0.90836632 | 0.19530369  | 16   | 46   | 7    |
| 6447      | NR_027000.NR_027000_dup1      | NLINC00965     | long intergenic non-protein codin   | 1.214769807  | -2.776290504 | 0.137884   | 0.17651    | 0.047816    | 0.49317359  | 0.58077243 | 0.19530369  | 16   | 26   | 7    |
| 29113     | NM_001144757.NM_003020        | SC05           | secretogranin V                     | 1.235494073  | -2.777089311 | 1.721019   | 2.133558   | 0.571711    | 1.67378945  | 1.89025626 | 0.83750224  | 88   | 142  | 38   |
| 25907     | NR_004126                     | C16orf71       | C protein subunit gamma 11          | 2.60528076   | -2.778478408 | 1.852031   | 1.852031   | 1.852031    | 1.852031    | 1.852031   | 1.852031    | 237  | 237  | 110  |
| 100616269 | NM_0010470                    | C6orf15        | chromosome 6 open reading fram      | -5.078847997 | -2.782199493 | 12.087647  | 2.370078   | 0.407421    | 3.84522223  | 1.86027027 | 2.53718654  | 525  | 138  | 232  |
| 94145     | NM_015444                     | TMEM158        | transmembrane protein 158 (gen      | 1.8696027    | -2.785492209 | 4.421357   | 8.293984   | 1.485288    | 3.17367098  | 4.00026496 | 1.95553636  | 315  | 787  | 139  |
| 100847033 | NR_039782                     | MIR4639        | microRNA 4639                       | 1.068150199  | -2.787681726 | 2.624011   | 2.711431   | 0.639602    | 0.23670415  | 0.23670415 | 0.08695753  | 7    | 10   | 3    |
| 29113     | NR_146801                     | CDRT3          | CMT1A duplicated region transcr     | -1.489387219 | -2.787681726 | 0.328456   | 0.48482    | 0.090674    | 0.23670415  | 0.23670415 | 0.08695753  | 7    | 14   | 3    |
| 4602      | NR_049830.NR_049830_dup1      | MSA43BEB2      | MSA43BEB2                           | 1.329394012  | -2.787681726 | 1.797413   | 1.333386   | 0.623447    | 0.23670415  | 0.18071335 | 0.08695753  | 7    | 7    | 3    |
| 26018     | NM_001135195.NM_00135945      | MYB            | myeloid cell leukemia 1             | -2.095228919 | -2.787681726 | 0.285291   | 0.028529   | 0.028529    | 0.028529    | 0.028529   | 0.028529    | 106  | 106  | 42   |
| 728537    | NM_001130172.NM_001130173     | MYB            | MYB proto-oncogene, transcripti     | -2.480424459 | -2.787823641 | 0.285643   | 0.115189   | 0.097822    | 1.03161781  | 0.50527715 | 0.450708734 | 61   | 22   | 18   |
| 1270      | NM_015541                     | LRIG1          | leucine rich repeats and immuno     | 2.107428727  | -2.790648906 | 0.358504   | 0.761793   | 0.121227    | 1.42282133  | 2.18453503 | 0.6758587   | 46   | 186  | 29   |
| 9127      | NM_001351368.NR_038386        | LINC01125      | long intergenic non-protein codin   | 1.541350733  | -2.790648906 | 1.284006   | 2.0289     | 0.471787    | 1.42282133  | 1.84504029 | 0.6758587   | 225  | 136  | 29   |
| 10785544  | NM_000614                     | CNTF           | ciliary neurotrophic factor         | -9.657729182 | -2.792810421 | 3.10827    | 0.313656   | 1.040542    | 2.75082071  | 0.669904   | 1.60891398  | 225  | 31   | 99   |
| 710       | NM_001159554.NM_001349874     | PZR8X          | putnergic receptor PZR 8            | 1.728319005  | -2.793614954 | 0.299489   | 0.517072   | 0.102057    | 0.88002952  | 1.26944952 | 0.36729312  | 32   | 74   | 14   |
| 619562    | NR_046836                     | LOC107895544   | uncharacterized LOC107895544        | -1.001130124 | -2.794148667 | 1.559419   | 1.559419   | 1.559419    | 2.95890107  | 2.95745524 | 1.77525964  | 268  | 268  | 117  |
| 399959    | NM_000002.NM_001032295        | SERPINC1       | serpin family G member 1            | 3.47115935   | -2.794965112 | 0.637553   | 0.203339   | 0.203339    | 1.15225689  | 2.39263351 | 0.52049563  | 48   | 223  | 261  |
| 12495     | NR_002580                     | SNORA3A        | small nucleolar RNA, H/ACA box      | -1.366808301 | -2.799665415 | 44.410044  | 32.51062   | 14.784923   | 2.72881625  | 2.35549733 | 1.58918956  | 321  | 216  | 97   |
| 100506119 | NR_024430.NR_137175.NR_131    | MIR100HG       | miR-100-let-7a-miR-125b-1 clust     | -1.63120692  | -2.80302888  | 16.096386  | 26.976249  | 8.992383    | 6.28821063  | 5.59384468 | 4.83403711  | 2029 | 2481 | 1329 |
| 112485    | NM_138408                     | FTF3C          | general transcription factor IIIC s | -1.390821876 | -2.803163332 | 42.678463  | 30.721935  | 14.306141   | 5.33914513  | 4.87770135 | 3.91478732  | 1550 | 1489 | 680  |
| 22981     | NM_001101648.NM_001309887     | NPC1L1         | NPC1 like intracellular cholesterol | 1.380228219  | -2.80328031  | 0.153288   | 0.153288   | 0.153288    | 0.153288    | 0.153288   | 0.153288    | 23   | 40   | 10   |
| 12495     | NM_001286574.NM_001286576     | ATM12          | emadillo repeat containing 12       | 1.85058992   | -2.803976301 | 0.908918   | 0.908918   | 0.152423    | 0.60524311  | 0.60116578 | 0.57153692  | 23   | 57   | 10   |
| 100506119 | NR_120685.NR_120686           | LINC01503      | long intergenic non-protein codin   | -1.085345185 | -2.806959782 | 1.349169   | 1.274234   | 0.451599    | 0.99521185  | 0.93737891 | 0.43515728  | 39   | 48   | 17   |
| 286467    | NR_026975                     | FIRRE          | fire intergenic repeating RNA ele   | 1.71548776   | -2.813570283 | 2.466215   | 4.247827   | 0.819453    | 3.00997359  |            |             |      |      |      |

|            |                               |              |                                     |              |              |            |             |            |             |             |             |       |       |      |
|------------|-------------------------------|--------------|-------------------------------------|--------------|--------------|------------|-------------|------------|-------------|-------------|-------------|-------|-------|------|
| 105377623  | NR_136203                     | LOC105377623 | uncharacterized LOC105377623        | -1.020273241 | -2.89946168  | 0.383131   | 0.382024    | 0.101078   | 0.38477185  | 0.38406669  | 0.14214747  | 12    | 16    | 5    |
| 283416     | NR_121682                     | LINC01465    | long intergenic non-protein codin   | 1.123207233  | -2.904681638 | 0.589722   | 0.657482    | 0.184154   | 0.9766584   | 1.06116576  | 0.41288872  | 37    | 57    | 16   |
| 28167      | NM_015689                     | PCDH8B5      | protocadherin beta 5                | -2.081841415 | -2.905269909 | 0.569894   | 0.271807    | 0.161693   | 1.39514558  | 0.83317479  | 0.84076093  | 68    | 41    | 27   |
| 295568     | NR_030397                     | SNHG15       | small nuclear RNA host gene 1       | -1.235108908 | -2.906789659 | 66.100712  | 53.983675   | 21.338223  | 5.71990486  | 5.42162358  | 4.23024804  | 2030  | 24    | 296  |
| 146206     | NM_001013838,NM_001317026     | CARMIL2      | capping protein regulator and myr   | 1.576367322  | -2.911074707 | 1.36807    | 2.174902    | 0.439072   | 2.85098947  | 3.43277448  | 1.64757178  | 244   | 514   | 103  |
| 55509      | NM_018664                     | BATF3        | basic leucine zipper ATF-like trar  | 1.110199729  | -2.91263557  | 0.825027   | 0.907466    | 0.260038   | 0.83964067  | 0.90836632  | 0.34394329  | 31    | 46    | 13   |
| 5059       | NM_001199771,NM_002905        | RDH5         | retinol dehydrogenase 5             | -7.684175161 | -2.916377611 | 2.578272   | 0.330973    | 0.820904   | 2.13345087  | 0.52452456  | 1.11084509  | 133   | 23    | 56   |
| 3204       | NM_006896                     | HOXA7        | homeobox A7                         | -2.121968074 | -2.923444196 | 0.547482   | 0.253802    | 0.169225   | 1.06712786  | 0.59904473  | 0.45708734  | 43    | 27    | 18   |
| 4036       | NM_004525                     | LRP2         | LDL receptor related protein 2      | -7.774568627 | -2.925229995 | 0.017356   | 0.044983    | 0.017356   | 0.08923103  | 0.10601636  | 0.27153692  | 24    | 4     | 10   |
| 55110      | NM_001300730,NM_00139985      | MAOGBF       | magi homolog B, exon junction c     | -2.109167717 | -2.936143333 | 8.423941   | 6.924394    | 1.331433   | 5.57748034  | 6.53426891  | 4.08112291  | 1636  | 793   | 1163 |
| 6405       | NM_001318798,NM_001318800     | SEMA3F       | semaphorin 3F                       | -1.209492977 | -2.936844927 | 2.63868    | 2.031543    | 0.840019   | 3.3316643   | 2.99586866  | 2.03057861  | 356   | 366   | 149  |
| 652        | NM_001202,NM_001347912,NM8MP4 |              | bone morphogenetic protein 4        | -2.721095171 | -2.940809645 | 5.287087   | 13.925631   | 1.618254   | 3.40980893  | 4.7611221   | 2.09493548  | 378   | 1370  | 158  |
| 222901     | NR_026673                     | RPL23P8      | ribosomal protein L23 pseudogog     | -2.171056089 | -2.94101575  | 0.221878   | 0.093141    | 0.071886   | 0.17294258  | 0.08023518  | 0.0855501   | 5     | 3     | 2    |
| 407835     | NR_002144                     | LOC407835    | mitogen-activated protein kinase    | -1.326777498 | -2.94101575  | 0.066932   | 0.051892    | 0.023104   | 0.17294258  | 0.13134883  | 0.0855501   | 5     | 5     | 2    |
| NR_028350  | LOC401454                     |              | prothymosin, alpha pseudogene       | -2.171056089 | -2.94101575  | 0.09425    | 0.038162    | 0.18415    | 0.17294258  | 0.08023518  | 0.0855501   | 5     | 3     | 2    |
| 100124534  | NR_003704                     | SNORA84      | small nuclear RNA, HACA box         | -2.171056089 | -2.94101575  | 0.841102   | 0.375848    | 0.174145   | 0.17294258  | 0.08023518  | 0.0855501   | 5     | 3     | 2    |
| 100287478  | NM_001256862,NM_001256862     | USP17L21     | ubiquitin specific peptidase 17-lik | -1.326777498 | -2.94101575  | 0.080625   | 0.050053    | 0.024524   | 0.17294258  | 0.13134883  | 0.0855501   | 5     | 5     | 2    |
| 100847074  | NR_049811                     | MIR5088      | microRNA 5088                       | 1.193356706  | -2.94101575  | 1.334458   | 1.783529    | 0.45593    | 0.17294258  | 0.20477631  | 0.0855501   | 5     | 8     | 2    |
| 102060282  | NR_109831                     | RASSF1-AS1   | RASSF1 antisense RNA 1              | 1.486457258  | -2.94101575  | 0.133136   | 0.248891    | 0.045825   | 0.17294258  | 0.25173066  | 0.0855501   | 5     | 10    | 2    |
| 105377686  | NR_131965,NR_131966,NR_13     | LINC02365    | long intergenic non-protein codin   | 1.486457258  | -2.94101575  | 0.141242   | 0.237123    | 0.044432   | 0.17294258  | 0.25173066  | 0.0855501   | 5     | 10    | 2    |
| 196410     | NM_152537                     | METTL7B      | methyltransferase like 7B           | -1.34834568  | -2.944239358 | 19.102781  | 14.172924   | 6.08908    | 4.85762021  | 4.44381342  | 3.3938282   | 1099  | 1089  | 499  |
| 125113     | NM_152349                     | KRT222       | keratin 222                         | -1.259829354 | -2.948601291 | 0.242993   | 0.195367    | 0.080302   | 0.5190475   | 0.42561204  | 0.19530369  | 17    | 18    | 7    |
| 285596     | NM_173663,NR_146226,NR_14     | FAM153A      | family with sequence similarity 1   | 4.79524598   | -2.949401054 | 1.538959   | 7.470815    | 0.45137    | 2.94941774  | 5.05551521  | 1.71282633  | 264   | 1692  | 110  |
| 441432     | NR_026558                     | AQP7P3       | aquaporin 7 pseudogene 3            | -3.203876195 | -2.950493829 | 2.006238   | 0.61471     | 0.631808   | 1.03161781  | 0.40408891  | 0.43515728  | 41    | 17    | 17   |
| 1002723566 | NR_136302                     | LOC102723566 | uncharacterized LOC102723566        | -1.42096426  | -2.953124353 | 5.313722   | 3.742225    | 1.691353   | 3.54187697  | 3.08609378  | 2.20270591  | 418   | 393   | 174  |
| 3207       | NM_005523                     | HOXA11       | homeobox A11                        | -1.19815803  | -2.954211624 | 2.22409    | 1.855458    | 0.705904   | 2.75626978  | 2.53704518  | 1.5590879   | 226   | 252   | 94   |
| 8187       | NM_001095282,NM_001099282     | SLC12A1      | solute carrier family 12 member 1   | -2.272291673 | -2.954344603 | 2.424028   | 7.929121    | 2.6684181  | 4.01032692  | 4.23549523  | 3.01141812  | 214   | 214   | 11   |
| 201798     | NM_145720                     | TIGD4        | tigger transposable element dier    | -3.354713388 | -2.961076932 | 0.604455   | 0.181985    | 0.188857   | 0.38078272  | 0.52452456  | 0.58206975  | 28    | 23    | 24   |
| 284751     | NR_034124                     | LINC01270    | long intergenic non-protein codin   | -8.624491445 | -2.963488407 | 0.517857   | 0.058354    | 0.164978   | 1.11880553  | 0.18071335  | 0.47868902  | 46    | 7     | 19   |
| 345193     | NM_198506                     | LRIT3        | leucine rich repeat, Ig-like and tr | -1.041621647 | -2.963488407 | 0.335525   | 0.317342    | 0.104253   | 1.11880553  | 1.08728891  | 0.47868902  | 46    | 59    | 19   |
| 54984      | NM_001284356,NM_017884        | PINX1        | PIN2/TERF1 interacting, telomer     | -1.127380081 | -2.963782824 | 12.487066  | 11.109013   | 3.951477   | 4.14719676  | 3.7292661   | 740         | 877   | 307   |      |
| 4807       | NM_005598                     | NHLH1        | nascent helix-loop-helix 1          | 1.169757683  | -2.964817872 | 1.038634   | 1.885219    | 1.685219   | 1.84504029  | 0.80366934  | 87          | 136   | 36    |      |
| 85242      | NR_020227                     | SNORA78A     | small nuclear RNA, HACA box         | -1.04509444  | -2.967705763 | 54.085478  | 25.391945   | 6.509976   | 3.16899478  | 3.16899478  | 2.16899478  | 372   | 372   | 16   |
| 169270     | NM_001042415,NM_001042416     | ZNF596       | zinc finger protein 596             | -1.22749478  | -2.968142723 | 1.956153   | 1.629741    | 0.612492   | 2.69516719  | 2.4491251   | 1.50747923  | 215   | 234   | 89   |
| 389741     | NR_015363,NR_126044,NR_12     | GLI3         | glioblastoma down-regulated RN      | 1.126812305  | -2.971998633 | 7.523126   | 0.965407    | 0.247276   | 3.69442889  | 3.85387581  | 2.32699908  | 416   | 706   | 194  |
| 114038     | NR_026863                     | LINC00313    | long intergenic non-protein codin   | -1.013543289 | -2.976230635 | 0.952376   | 0.281831    | 0.4818297  | 2.64188297  | 0.63490936  | 0.24657076  | 22    | 29    | 9    |
| 692312     | NM_001040664,NM_001198690     | PPAN-PRY11   | PPAN-PRY11 readthrough              | -1.09844368  | -2.978211005 | 15.544608  | 14.178353   | 8.899071   | 5.63962535  | 5.50702099  | 4.12116227  | 1918  | 212   | 792  |
| 1757       | NM_001134707,NM_007101        | SST2D1       | serotonine dehydrogenase            | -2.374157273 | -2.97895639  | 0.235935   | 0.237581    | 0.237581   | 1.15170785  | 0.13597328  | 0.56277312  | 12    | 48    | 11   |
| 51602      | NM_015934                     | NOP58        | NOP58 ribonucleoprotein 5           | 1.0504021    | -2.988144446 | 153.178391 | 161.94977   | 48.170227  | 8.25458087  | 8.33300788  | 6.68466564  | 11951 | 16863 | 4919 |
| 54575      | NM_019075                     | UGT1A10      | UDP glucuronosyltransferase fan     | 2.17681504   | -2.991661016 | 9.725415   | 21.196379   | 3.057957   | 4.56027919  | 5.64914731  | 3.09742492  | 887   | 2680  | 585  |
| 284723     | NM_207348                     | SLC25A34     | solute carrier family 25 member :   | -2.988281787 | -2.98827319  | 1.236287   | 0.654711    | 0.385303   | 2.23841445  | 1.5673195   | 1.16514558  | 146   | 103   | 60   |
| 1124       | NM_001039936,NM_001293069     | CHN2         | chimerin 2                          | -3.998396703 | -2.988442793 | 1.045659   | 0.251841    | 0.314697   | 2.09955541  | 0.86372326  | 1.06873498  | 129   | 43    | 53   |
| 100874365  | NR_047506                     | HOXC-AS3     | HOXC cluster antisense RNA 3        | -1.726046176 | -2.991254473 | 3.062167   | 1.758281    | 0.939897   | 1.08456011  | 0.72085408  | 0.405708734 | 44    | 34    | 18   |
| 101935030  | NR_033267                     | LOC102335030 | CCRF1 oncogene partner 2 pseu       | -1.26039532  | -2.992244174 | 1.96435    | 1.992244174 | 1.96435    | 1.992244174 | 1.992244174 | 0.29599524  | 516   | 768   | 18   |
| 10863      | NM_001304351,NM_014265        | MMADAM28     | ADAM metalloproteinase domain       | -1.113925319 | -2.992320242 | 1.911881   | 2.526174    | 0.602652   | 3.82202563  | 3.96723624  | 2.24038515  | 44    | 34    | 212  |
| 6835       | NM_001278928,NM_017503        | SURF2        | surfeit 2                           | -1.161515266 | -3.000239734 | 44.477957  | 38.337196   | 13.909929  | 5.23273681  | 5.02289554  | 3.72222359  | 1437  | 1653  | 589  |
| 7805       | NM_006762                     | LAPTM5       | lysosomal protein transmembran      | 2.147410835  | -3.002837176 | 1.079396   | 0.338733    | 0.338733   | 1.75224037  | 0.6042858   | 0.83750224  | 93    | 267   | 38   |
| 642776     | NR_130730,NR_132337           | DANT2        | DX24 associated non-coding tra      | -1.056888946 | -3.00569727  | 0.149322   | 0.038055    | 0.038055   | 0.3273552   | 0.48579948  | 0.1148164   | 10    | 21    | 4    |
| 100124533  | NR_003703                     | SCARNA27     | small Cajal body-specific RNA 27    | -1.211902248 | -3.00569727  | 2.055734   | 1.618835    | 0.612559   | 0.3273552   | 0.27446693  | 0.1148164   | 10    | 11    | 4    |
| 100272345  | NR_152065                     | ZNF781       | zinc finger protein 781             | -1.05640033  | -3.00569727  | 0.05697527 | 0.078901    | 0.078901   | 0.3273552   | 0.38453869  | 0.1148164   | 10    | 16    | 4    |
| 102723345  | NR_135320                     | LOC102723345 | uncharacterized LOC102723345        | -1.477002155 | -3.00569727  | 0.578365   | 0.357544    | 0.182541   | 0.3273552   | 0.2284445   | 0.1148164   | 10    | 10    | 4    |
| 102465975  | NR_106821                     | MIR6763      | microRNA 6763                       | -1.027484135 | -3.00569727  | 3.833534   | 3.735206    | 1.086948   | 0.3273552   | 0.31941552  | 0.1148164   | 10    | 13    | 4    |
| 554225     | NR_146078                     | STRCP1       | stereocilin pseudogene 1            | -2.000210892 | -3.006356863 | 0.259477   | 0.128395    | 0.079035   | 1.24819466  | 0.75384785  | 0.54161868  | 54    | 36    | 22   |
| 100127983  | NM_001190972                  | C8orf88      | chromosome 8 open reading fra       | -1.561001298 | -3.006400689 | 1.880066   | 1.207765    | 0.57097    | 1.55375576  | 1.16293478  | 0.71544605  | 76    | 65    | 45   |
| 288        | NM_000478                     | AMH          | anti-Mullerian hormone              | -1.365225584 | -3.011386929 | 14.542503  | 10.821191   | 4.539749   | 4.76875136  | 4.3576867   | 3.28075123  | 1031  | 1023  | 421  |
| 101935030  | NR_030372,NM_018534,NM_20     | NRPR1A       | neuronal protein 1                  | 1.107320798  | -3.01470577  | 17.328565  | 19.491392   | 6.326587   | 6.76962433  | 6.06119659  | 5.94081969  | 3833  | 5871  | 1564 |
| 399975     | NR_145484                     | LOC399975    | uncharacterized LOC399975           | -2.492091159 | -3.014456106 | 2.431125   | 0.907163    | 0.257187   | 3.25675288  | 2.14776987  | 1.94004466  | 137   | 180   | 46   |
| 647033     | NR_003284                     | PA2G4P4      | proliferation-associated 2G4 pse    | 1.135214376  | -3.017794428 | 1.118665   | 1.271339    | 0.346573   | 2.00201503  | 2.14154997  | 0.99569924  | 118   | 179   | 48   |
| 7762       | NM_013250                     | ZNF215       | zinc finger protein 215             | -1.363281247 | -3.021235715 | 8.954397   | 6.579306    | 2.782616   | 5.04068637  | 4.6093958   | 3.53128747  | 1228  | 510   | 58   |
| 105416157  | NR_131157                     | NKILA        | NF-kappaB interacting IncRNA        | 1.079461081  | -3.02403311  | 7.328853   | 7.920414    | 2.27513    | 4.28857758  | 4.39345927  | 2.83393297  | 728   | 1050  | 296  |
| 5179       | NM_001099653,NM_018172        | NFAM8CC1     | family with sequence similarity 8   | 1.255196578  | -3.025196578 | 1.735710   | 1.693360    | 1.335875   | 4.06572605  | 2.56277312  | 2.56277312  | 593   | 826   | 241  |
| 115382     | NM_001134486,NM_052942        | GBF5         | guanylate binding protein 5         | -1.427196617 | -3.028226501 | 0.090412   | 0.066615    | 0.024865   | 0.64682716  | 0.3412894   | 0.16897038  | 17    | 14    | 6    |
| 4862       | NM_002518                     | NPAS2        | neuronal PAS domain protein 2       | -1.55700873  | -3.030865755 | 21.041443  | 13.527442   | 6.521898   | 6.35776791  | 5.74661881  | 4.81806082  | 3221  | 2764  | 1307 |
| 100288181  | NR_038925                     | LOC100288181 | uncharacterized LOC100288181        | -2.096649785 | -3.032318411 | 2.701486   | 0.834515    | 0.39562384 | 3.0232078   | 2.56774382  | 2.36774382  | 374   | 374   |      |

|           |                                          |              |                                     |              |              |            |            |             |             |             |            |      |      |      |
|-----------|------------------------------------------|--------------|-------------------------------------|--------------|--------------|------------|------------|-------------|-------------|-------------|------------|------|------|------|
| 650794    | NR_038939.NR_046461                      | MIPEPP3      | mitochondrial intermediate peptic   | 1.163260734  | -3.120912078 | 0.25337    | 0.304117   | 0.073848    | 0.54446555  | 0.61708849  | 0.19530369 | 18   | 28   | 7    |
| 401027    | NM_213608                                | C2orf66      | chromosome 2 open reading fram      | 1.276161639  | -3.121706979 | 0.580389   | 0.750408   | 0.168711    | 1.2010231   | 1.41062362  | 0.49997203 | 151  | 20   | 20   |
| 1947      | NM_004429                                | EFNB1        | ephrin B1                           | -2.007716379 | -3.12173017  | 9.549298   | 4.757512   | 2.869186    | 4.98677622  | 4.24260277  | 3.44886901 | 1216 | 812  | 479  |
| 113763    | NM_138434                                | ZBED3CL      | ZBED3 C-terminal like               | 1.102358752  | -3.122060963 | 4.367963   | 4.821769   | 1.313286    | 3.72631928  | 3.85577671  | 2.29691521 | 460  | 3    | 189  |
| 374393    | NM_001142703.NM_001142704.FAM111B        |              | family with sequence similarity 1   | 1.013372191  | -3.123234217 | 35.561692  | 36.061124  | 10.746324   | 6.95301021  | 6.97202111  | 5.33441396 | 4825 | 6533 | 1900 |
| 105374261 | NR_146716                                | LINC02041    | long intergenic non-protein codin   | 1.641231196  | -3.133324049 | 1.104466   | 0.317752   | 1.822906    | 1.03161781  | 1.44132992  | 0.41288872 | 41   | 90   | 16   |
| 9586      | NM_001011666.NM_004904.NMCREB5           |              | ADP responsive element bindin       | -1.685475536 | -3.13350002  | 2.46351    | 1.496405   | 0.75482     | 4.35113248  | 3.64550876  | 2.84640965 | 7362 | 460  | 299  |
| 7378      | NM_001287426.NM_001287428.UPP1           |              | uridine phosphorylase 1             | 1.105134045  | -3.133613707 | 80.970899  | 67.775512  | 22.470317   | 0.679023237 | 0.64737704  | 5.16987408 | 4706 | 5206 | 1690 |
| 26782     | NR_002738                                | SNCRD57      | small nuclear RNA, CID box 57       | 1.262653242  | -3.133720163 | 82.225296  | 104.128662 | 24.452091   | 3.35533783  | 3.35533783  | 1.50747923 | 227  | 383  | 3    |
| 11184     | NM_001042600.NM_007181                   | MAP4K4       | mitogen-activated protein kinase    | -1.234984731 | -3.136948421 | 1.591736   | 0.464741   | 0.395158    | 1.17516567  | 0.97354558  | 0.17516567 | 64   | 30   | 26   |
| 132946    | NM_206919                                | ARL9         | ADP ribosylation factor like GTPi   | 1.17212194   | -3.138847011 | 0.396274   | 0.701862   | 0.100107    | 0.41264541  | 0.65251278  | 0.14214747 | 13   | 60   | 5    |
| 107984773 | NR_147199.NR_147200.NR_147201.LINC01852  |              | long intergenic non-protein codin   | 1.378068462  | -3.138847011 | 0.187955   | 0.246088   | 0.082172    | 0.41264541  | 0.54351856  | 0.14214747 | 13   | 24   | 5    |
| 54825     | NM_001171976.NM_00117675                 | CDHR2        | cadherin related family member 2    | -1.15648108  | -3.138847011 | 0.078104   | 0.066458   | 0.023134    | 0.41264541  | 0.36283659  | 0.14214747 | 13   | 5    | 5    |
| 55638     | NM_001099743.NM_001099744.SYBU           |              | syntabulin                          | -1.750149897 | -3.141345325 | 3.658705   | 2.090591   | 1.207829    | 3.5292011   | 2.81230346  | 2.12262417 | 414  | 318  | 162  |
| 374919    | NM_001303251.NM_002280                   | ZEBD8        | zinc finger BED-type containing 8   | 1.089585854  | -3.143625257 | 1.979294   | 2.2721194  | 1.199642    | 3.62454406  | 3.71417485  | 2.20270591 | 445  | 636  | 174  |
| 84766     | NM_001144958.NM_003280                   | CRACR2A      | calcium release activated channel   | 0.71395678   | -3.146069508 | 0.71395678 | 0.6522891  | 0.2121592   | 1.59621863  | 1.44132992  | 0.89713258 | 77   | 90   | 30   |
| 10096702  | NR_103746                                | LINC01356    | long intergenic non-protein codin   | -1.182676374 | -3.152597852 | 0.434828   | 0.373856   | 0.125281    | 0.83964067  | 0.73744528  | 0.32020933 | 31   | 35   | 12   |
| 8630      | NM_003725                                | HSD17B6      | hydroxysteroid 17-beta dehydrog     | -1.421949198 | -3.156289497 | 0.785689   | 0.552389   | 0.23472     | 1.16869613  | 0.90836632  | 0.68689802 | 49   | 46   | 19   |
| 64091     | NM_001308333.NM_0022135                  | POPCDC2      | popeye domain containing 2          | 1.3287838    | -3.15800382  | 0.126281   | 1.313138   | 0.288567    | 1.43646263  | 1.70885125  | 0.62147005 | 67   | 119  | 26   |
| 116936    | NR_000026                                | SNCORD139    | small nuclear RNA, CID box 13       | 1.221321202  | -3.160031422 | 136.730942 | 167.236588 | 40.411919   | 3.05929974  | 3.3161202   | 1.73049093 | 288  | 470  | 112  |
| 374919    | NM_001303255.NM_199340                   | LIRC37A3     | leucine rich repeat containing 37   | -1.489752874 | -3.16592559  | 3.565992   | 2.503516   | 1.132811    | 4.3919615   | 3.8503065   | 2.87112187 | 785  | 704  | 305  |
| 6097      | NM_001001523.NM_005060                   | RORC         | RAR related orphan receptor C       | -5.47993483  | -3.164894695 | 0.521293   | 0.095744   | 0.153172    | 1.36692851  | 0.36283659  | 0.58209675 | 62   | 15   | 24   |
| 1960      | NM_001199880.NM_001199881.EGR3           |              | early growth response 3             | 2.010855184  | -3.167938249 | 0.156824   | 0.312473   | 0.04612     | 0.73313634  | 1.22307764  | 0.27153692 | 26   | 70   | 10   |
| 100616292 | NR_039839                                | MIR4690      | microRNA 4690                       | 1.256485834  | -3.167938249 | 11.181139  | 14.361583  | 3.255515    | 0.73313634  | 0.8787583   | 0.27153692 | 26   | 44   | 10   |
| 27022     | NM_012183                                | FOXO3        | forkhead box D3                     | -1.067926367 | -3.179644362 | 0.09682    | 0.091595   | 0.019331    | 0.26755841  | 0.25173066  | 0.08696753 | 8    | 10   | 3    |
| 2201      | NM_0011999                               | FBN2         | fibronlin 2                         | 3.8906135    | -3.179644362 | 0.019516   | 0.075665   | 0.005592    | 0.26755841  | 0.84852988  | 0.08696753 | 8    | 12   | 3    |
| 101922720 | NR_0110871                               | DEFDC1       | DEFDC1 antisense RNA 1              | 3.05973024   | -3.179644362 | 0.160357   | 0.047737   | 0.0155145   | 0.70409823  | 0.70409823  | 0.20385373 | 459  | 462  | 409  |
| 101928378 | NR_110730                                | PTOV1-AS1    | PTOV1 antisense RNA 2               | 1.104955933  | -3.180657752 | 25.1373    | 27.790575  | 7.420397    | 4.80469545  | 4.94376615  | 3.24338068 | 1058 | 158  | 3    |
| 3203      | NM_024014                                | H0XA6        | homeobox A6                         | -4.15068174  | -3.187776075 | 2.536935   | 0.597472   | 0.745963    | 1.57857476  | 0.56226574  | 0.69713258 | 78   | 25   | 30   |
| 348174    | NM_001136214.NM_001271197.CLEC18A        |              | C-type lectin domain family 18 m    | -1.22782383  | -3.189206964 | 1.018004   | 0.833084   | 0.299515    | 1.73025772  | 1.52971203  | 0.78645063 | 91   | 99   | 35   |
| 349277    | NM_00106822.NR_146095.NR_NANOS3          |              | nanos C2HC-type zinc finger 3       | -2.236462683 | -3.194685305 | 1.85503    | 0.923067   | 0.686245    | 1.13562816  | 0.61708849  | 0.45708734 | 47   | 28   | 18   |
| 100505696 | NR_046084                                | SH3BP5-AS1   | SH3BP5 antisense RNA 1              | 1.179802501  | -3.199543051 | 3.101721   | 3.660193   | 0.910534    | 4.15675275  | 4.36265215  | 2.64620047 | 661  | 1042 | 294  |
| 165241    | NM_001168215.NM_153229                   | TM62B2       | transmembrane protein 62B           | -1.05881195  | -3.205871109 | 0.348636   | 0.091471   | 0.287928    | 1.86732556  | 1.387928    | 0.45708734 | 67   | 139  | 7    |
| 1437      | NM_000758                                | CSF2         | colony stimulating factor 2         | 1.28048533   | -3.209125194 | 41.213123  | 52.857494  | 12.068625   | 5.02271227  | 5.37007127  | 3.43512339 | 1237 | 2117 | 474  |
| 84290     | NM_003230                                | CAPNS2       | calpain small subunit 2             | -1.437297743 | -3.209538186 | 1.063961   | 0.745265   | 0.296172    | 1.04948198  | 0.80196545  | 0.41288872 | 42   | 39   | 16   |
| 345643    | NM_001190787                             | MCIDAS       | multiciliate differentiation and DN | -1.753142483 | -3.225629275 | 3.943599   | 0.98297    | 2.99161027  | 2.31185141  | 1.65707652  | 0.273      | 280  | 104  | 104  |
| 28951     | NM_021643.NR_027303                      | TRIB2        | tribbles pseudokinase 2             | -1.109918965 | -3.227620252 | 4.983685   | 4.668365   | 1.448467    | 4.48515183  | 4.34285452  | 2.9311116  | 873  | 1012 | 320  |
| 39591     | NM_001292041.NM_005335                   | NCLS1        | hemipolietic cell-specific Lysyl as | 1.733670112  | -3.228610585 | 0.58932639 | 1.464572   | 0.58932639  | 1.13817896  | 0.96799987  | 0.36799987 | 37   | 37   | 48   |
| 102465444 | NR_106800                                | MIR6472      | microRNA 6742                       | -1.52166096  | -3.228610585 | 6.630141   | 4.391739   | 1.634301    | 0.46317359  | 0.3412894   | 0.16897038 | 16   | 14   | 6    |
| 284618    | NR_145424.NR_145425.NR_147RUSC1-AS1      |              | RUSC1 antisense RNA 1               | -1.846660918 | -3.244412523 | 2.632334   | 1.40469    | 0.754777    | 2.46162969  | 1.78245981  | 1.25551499 | 177  | 128  | 67   |
| 10893     | NM_006690                                | MMP24        | matrix metalloproteinase 24         | 1.556755884  | -3.245425254 | 0.144307   | 0.036904   | 0.68823103  | 0.96581954  | 0.24657076  | 0.24657076 | 24   | 50   | 9    |
| 6450      | NM_001001713.NM_001317740.SH3BGR         |              | SH3 domain binding glutamate ri     | -1.45412587  | -3.249628727 | 0.3441521  | 2.235799   | 0.967126    | 2.15010456  | 1.75012126  | 1.03969283 | 135  | 124  | 51   |
| 8336      | NM_003514                                | HIST1H2AM    | histone cluster 1 H2A family men    | 1.821561448  | -3.253382098 | 1.667424   | 3.122343   | 0.475456    | 0.88002952  | 1.31437719  | 0.32020933 | 302  | 78   | 12   |
| 330474    | NM_018127.NM_080704.NM_080705            |              | transient receptor potential cano   | 1.203255091  | -3.26033488  | 3.7802269  | 3.343388   | 3.928016614 | 3.928016614 | 3.928016614 | 2.20916158 | 464  | 746  | 17   |
| 27040     | NM_001014987.NM_001014988.LAT            |              | linker for activation of T-cells    | 1.01530323   | -3.26515966  | 7.844422   | 8.108903   | 2.243675    | 3.80578134  | 3.80552077  | 2.29691521 | 502  | 681  | 189  |
| 206412    | NM_001010868                             | Cborf163     | chromosome 6 open reading fran      | -1.110338366 | -3.266803796 | 1.277036   | 1.154607   | 0.361181    | 1.39514558  | 1.30327576  | 0.58209675 | 67   | 77   | 24   |
| 91012     | NM_001281731.NM_001331069.CERS5          |              | ceramide synthase 5                 | -1.202545346 | -3.268920588 | 19.783079  | 17.134782  | 6.1108172   | 5.84893645  | 4.44847569  | 2.674      | 2971 | 1006 | 68   |
| 101927027 | NR_110204.NR_110205.NR_1110C10C101927027 |              | uncharacterized LOC101927027        | 1.756926178  | -3.269196916 | 2.141389   | 4.385494   | 0.629227    | 2.48807034  | 3.18617855  | 1.26797492 | 181  | 425  | 68   |
| 5575      | NM_001164758.NM_001164759.PRKAR1B        |              | protein kinase A-cAMP-dependent     | 1.004654802  | -3.281042412 | 11.533568  | 11.606251  | 3.289835    | 4.87149524  | 4.87796738  | 3.26529764 | 1110 | 1490 | 416  |
| 330474    | NR_038976                                | LINC030874   | uncharacterized LOC308974           | 1.090717302  | -3.283508172 | 0.778778   | 0.848504   | 0.220071    | 1.32454032  | 1.40024122  | 0.54143668 | 11   | 56   | 22   |
| 120881    | NM_001085447                             | CCDC173      | coiled-coil domain containing 173   | 1.644584023  | -3.287105252 | 0.414252   | 0.69273    | 0.110585    | 0.91952222  | 1.30327576  | 0.34394392 | 35   | 77   | 13   |
| 101929715 | NR_110597                                | LOC101929715 | uncharacterized LOC101929715        | 1.467296963  | -3.289258898 | 0.777248   | 1.162288   | 0.220457    | 1.5057075   | 1.00745609  | 0.27153692 | 27   | 53   | 10   |
| 92291     | NM_144575                                | CAPN13       | calpain 13                          | 4.752929836  | -3.289258898 | 0.255751   | 1.253491   | 0.072809    | 0.7505705   | 2.09724475  | 0.27153692 | 27   | 172  | 10   |
| 100128285 | NR_024595                                | DNM1P35      | dynamlin 1 pseudogene 35            | -1.242778962 | -3.289258898 | 0.192412   | 0.154705   | 0.055315    | 0.7505705   | 0.63490936  | 0.27153692 | 27   | 10   | 29   |
| 10666     | NM_001303618.NM_001303619.CDZ26          |              | CDZ26 molecule                      | 1.063208728  | -3.293222865 | 0.173233   | 0.187806   | 0.049699    | 0.56944351  | 0.59904473  | 0.19530369 | 19   | 27   | 10   |
| 7151      | NR_040054                                | LINC00062    | long intergenic non-protein codin   | -1.057421433 | -3.293222865 | 0.348636   | 0.330735   | 0.090074    | 0.56944351  | 0.54351856  | 0.19530369 | 19   | 24   | 7    |
| 164592    | NM_001331066.112                         | CCDC116      | coiled-coil domain containing 116   | -1.10311223  | -3.293222865 | 0.21903    | 0.01273    | 0.062349    | 0.56944351  | 0.52452456  | 0.19530369 | 19   | 23   | 7    |
| 64581     | NM_0022570.NM_197947.NM_19CLEC7A         |              | C-type lectin domain containing 7   | -1.584149411 | -3.293222865 | 0.180874   | 0.116201   | 0.044435    | 0.56944351  | 0.38406669  | 0.19530369 | 19   | 16   | 7    |
| 100113378 | NR_003684                                | SNCORD119    | small nuclear RNA, CID box 11       | -1.029436825 | -3.294216285 | 25.424681  | 24.72036   | 7.202867    | 1.76310734  | 1.73367802  | 0.78645063 | 94   | 122  | 35   |
| 199221    | NM_001170538.NM_173543                   | DZIP1L       | DAZ interacting zinc finger protei  | -1.07017074  | -3.29725106  | 2.478096   | 2.371846   | 0.698179    | 3.23349937  | 3.14635273  | 1.82669899 | 330  | 412  | 123  |
| 101928324 | NR_120456                                | LINC00312    | uncharacterized LOC00312            | -1.0562023   | -3.301678767 | 0.159402   | 0.322137   | 0.159402    | 0.33737893  | 0.33737893  | 0.2737893  | 23   | 63   | 4    |
| 3232      | NR_125952.NR_125953                      | LOC101928324 | uncharacterized LOC101928324        | -1.331809288 | -3.30234463  | 0.348338   | 0.25485    | 0.089339    | 0.35634914  | 0.27460693  | 0.1148164  | 11   | 11   | 11   |
| 6329      | NM_006898                                | H0XD3        | homeobox D3                         | 1.065233464  | -3.315520112 | 1.135125   | 1.19871    | 0.316784    | 1.82664339  | 1.88281796  | 0.82068496 | 100  | 141  | 37   |
| 1051      | NM_000334                                | SCN4A        | sodium voltage-gated channel al     | -6.252699016 |              |            |            |             |             |             |            |      |      |      |

|           |                                          |                                   |              |               |              |            |             |             |            |            |       |       |       |
|-----------|------------------------------------------|-----------------------------------|--------------|---------------|--------------|------------|-------------|-------------|------------|------------|-------|-------|-------|
| 3426      | NM_000204,NM_001318057,NMCF1             | complement factor I               | 2.062512609  | -3.42899467   | 0.071451     | 0.403719   | 0.053756    | 0.5190475   | 0.92294555 | 0.16897038 | 17    | 47    | 6     |
| 339804    | NM_001143959,NM_001143960,C2oH74         | chromosome 2 open reading frar    | -1.329753752 | -3.436753272  | 12.472955    | 9.321499   | 3.350864    | 3.56379523  | 3.19220918 | 2.05235145 | 425   | 427   | 152   |
| 84981     | NR_028502,NR_028503,NR_021MIR22HG        | MIR22 host gene                   | -1.454723987 | -3.43689506   | 22.763971    | 15.846585  | 6.24263     | 5.30129222  | 4.10939558 | 4.10939558 | 2195  | 2016  | 785   |
| 5644      | NM_002769                                | protease, serine 1                | -2.123807246 | -3.440337703  | 2.335007     | 1.033565   | 0.816481    | 1.51570785  | 0.8178563  | 0.82147005 | 73    | 44    | 26    |
| 4515      | NM_001018025                             | MTCP1                             | 1.03899484   | -3.444905295  | 4.478399     | 4.664246   | 1.217943    | 3.47735365  | 3.52883263 | 1.97485985 | 398   | 553   | 985   |
| 348654    | NM_001130009,NM_182625                   | GEN1                              | -1.110340864 | -3.445105754  | 25.913164    | 23.185133  | 7.005475    | 7.43659189  | 7.28650537 | 5.6722066  | 8137  | 2412  | 144   |
| 124961    | NM_153018                                | ZFP3                              | 2.568527124  | -3.450820302  | 0.32182      | 0.833339   | 0.084035    | 1.36928545  | 2.33928445 | 0.54161868 | 62    | 213   | 22    |
| 101928062 | NR_120459,NR_120460,NR_12LUNC01481       | long intergenic non-protein codin | -2.9519115   | -3.455919321  | 2.815262     | 1.080201   | 0.936168    | 1.75224037  | 0.84852988 | 0.51738414 | 93    | 43    | 33    |
| 728715    | NR_144634                                | ovastatin homolog 2               | -2.015119859 | -3.4627012    | 37.227859    | 18.49156   | 10.105546   | 5.05954162  | 4.99182073 | 4.51370499 | 1270  | 842   | 451   |
| 11219     | NM_080701                                | three prime repair exonuclease 2  | 1.042273047  | -3.465594414  | 1.743681     | 1.046527   | 1.250123    | 1.64851485  | 0.82147005 | 0.45708734 | 51    | 112   | 18    |
| 84699     | NM_0012171995,NM_001271996,CREB3L3       | cAMP responsive element bindin    | -1.889037948 | -3.465926414  | 0.506964     | 0.267243   | 0.134027    | 1.2012031   | 0.75347875 | 0.45708734 | 51    | 36    | 18    |
| 284443    | NM_001076678,NM_145326,NMZNFA93          | zinc finger protein 493           | 1.342319041  | -3.467535744  | 1.343145     | 2.044124   | 0.361655    | 2.73986043  | 3.10858833 | 1.39836968 | 223   | 400   | 79    |
| 10031688  | NR_037843                                | HOTTIP                            | -1.238921134 | -3.469105269  | 1.787507     | 1.442257   | 0.482131    | 3.18986937  | 2.91797176 | 1.73991364 | 319   | 344   | 113   |
| 100529097 | NM_001199973,NM_001199974,RPL36A-HNRNP42 | RPL36A-HNRNP42 readthrough        | -2.291163715 | -3.474893837  | 5.068474     | 2.273338   | 1.407299    | 3.79580649  | 2.7276415  | 2.23479744 | 506   | 295   | 179   |
| 79091     | NM_024099                                | LBDY1                             | -1.050056375 | -3.4749861599 | 17.677525    | 16.841911  | 4.747116    | 4.50061221  | 4.50061221 | 2.9074142  | 892   | 1135  | 314   |
| 375719    | NR_002817                                | AQP7P1                            | 1.825739308  | -3.490291575  | 1.100144     | 0.603172   | 0.292482    | 2.14180175  | 1.52015496 | 0.98063788 | 134   | 98    | 47    |
| 219347    | NR_027428,NR_027429,NR_021TMEM254-AS1    | TMEM254 antisense RNA 1           | -1.418152714 | -3.509370007  | 0.66185      | 0.467818   | 0.187223    | 1.8573935   | 1.51053416 | 0.80366934 | 103   | 97    | 36    |
| 26788     | NR_002736                                | SNORD60                           | -1.444544966 | -3.514228545  | 33.139278    | 23.076271  | 8.862743    | 1.88750088  | 1.52015496 | 0.82068496 | 106   | 98    | 37    |
| 101928865 | NR_120564                                | LOC101928865                      | 1.268459951  | -3.514394734  | 0.723349     | 0.921538   | 0.193321    | 1.11880553  | 1.31437719 | 0.41288872 | 46    | 78    | 16    |
| 79683     | NM_0013207278,NM_024610                  | HSPBAP1                           | 1.376471414  | -3.514828043  | 9.539375     | 13.122602  | 5.232842    | 4.2524017   | 4.69258035 | 2.61727269 | 709   | 1304  | 248   |
| 8120      | NM_001278511,NM_001278512                | AP3B2                             | 7.003057779  | -3.516319342  | 0.035698     | 0.561633   | 0.010072    | 0.20517559  | 1.06116576 | 0.9585501  | 6     | 57    | 2     |
| 51294     | NM_016580                                | PCDH12                            | 1.488162123  | -3.516319342  | 0.022302     | 0.035787   | 0.004162    | 0.20517559  | 0.29720487 | 0.0585501  | 6     | 12    | 2     |
| 129446    | NM_001079810,NM_001199143                | XIRP2                             | 2.223481544  | -3.516319342  | 0.012365     | 0.027826   | 0.003154    | 0.20517559  | 0.42561204 | 0.0585501  | 6     | 18    | 2     |
| 102465491 | NR_106877                                | MIR6819                           | -3.807641671 | -3.516319342  | 2.161352     | 0.381788   | 0.483404    | 0.20517559  | 0.05398282 | 0.0585501  | 6     | 2     | 2     |
| 1145      | NM_000080                                | CHRNE                             | 1.365088886  | -3.516319342  | 0.082714     | 0.008366   | 0.20517559  | 0.27464693  | 0.0585501  | 0.0585501  | 6     | 11    | 2     |
| 100847013 | NR_049889                                | MIR5692B                          | -7.138956275 | -3.516319342  | 1.64643      | 0.083037   | 0.307052    | 0.20517559  | 0.02734989 | 0.0585501  | 6     | 1     | 2     |
| 102465736 | NR_100847                                | MIR5789                           | 1.024662623  | -3.516319342  | 1.535244     | 1.535244   | 0.343191    | 0.20517559  | 0.40408891 | 0.0585501  | 6     | 2     | 2     |
| 440299    | NR_033787                                | DNM1P41                           | -3.807641671 | -3.516319342  | 0.032069     | 0.007719   | 0.007681    | 0.20517559  | 0.03298282 | 0.0585501  | 6     | 2     | 2     |
| 1506      | NM_001907                                | CTRL                              | 1.116801408  | -3.52195062   | 5.88979      | 6.37654    | 1.510948    | 2.92058788  | 3.05994879 | 1.51794971 | 258   | 385   | 90    |
| 728228    | NR_033917                                | LINC01433                         | 2.196868697  | -3.524630017  | 1.866545     | 4.125668   | 0.47631     | 1.16869613  | 0.43515728 | 0.43515728 | 49    | 144   | 147   |
| 100507607 | NM_001287250,NM_001287251                | PNPBP9                            | 1.090000365  | -3.525182863  | 1.618209     | 1.777384   | 0.416083    | 1.74129091  | 1.82964782 | 0.73352601 | 92    | 134   | 32    |
| 60681     | NM_021939                                | FKBP10                            | 2.003664111  | -3.5350501148 | 3.073051     | 3.698069   | 0.817891    | 3.26524058  | 3.50722624 | 1.78395874 | 339   | 544   | 118   |
| 22916     | NM_001297650,NM_174941                   | CD163 molecule like 1             | 1.427950773  | -3.531216984  | 1.611196     | 1.6829584  | 0.3025793   | 3.0925793   | 3.0925793  | 1.78395874 | 339   | 544   | 118   |
| 374383    | NM_001202439                             | NCR3L3G1                          | -2.867741384 | -3.53144043   | 1.671443     | 0.581578   | 0.443159    | 3.509976    | 2.20853486 | 1.97485985 | 408   | 190   | 142   |
| 100310846 | NM_0012171700                            | ANKRD61                           | -2.031581455 | -3.531900197  | 0.529046     | 0.26145    | 0.140327    | 0.79797761  | 0.44594451 | 0.27153692 | 29    | 19    | 10    |
| 959509    | NR_002442                                | SNORD18B                          | -1.381890846 | -3.531900197  | 10.619925    | 7.83233    | 0.733897    | 0.79797761  | 0.61708849 | 0.27153692 | 29    | 28    | 10    |
| 440028    | NR_033972                                | LOC440028                         | -2.012234718 | -3.534827455  | 1.106954     | 0.543767   | 0.293617    | 1.16293477  | 0.76902392 | 0.76902392 | 98    | 65    | 34    |
| 304373    | NM_001018116                             | CAVIN4                            | 1.183350119  | -3.541805176  | 0.548051     | 1.1460293  | 0.541805176 | 1.1460293   | 1.1460293  | 0.47868849 | 53    | 22    | 12    |
| 9045      | NM_001034996,NM_003973                   | RPL14                             | -1.268046449 | -3.542798771  | 12.16.752319 | 959.901886 | 323.454132  | 10.03750579 | 9.6952651  | 8.21601918 | 41222 | 43435 | 14310 |
| 106699570 | NR_133569                                | LOC106699570                      | -1.042678368 | -3.54607754   | 0.822277     | 0.275493   | 0.08602952  | 0.753037    | 0.83317479 | 0.29607837 | 32    | 41    | 11    |
| 3684      | NM_000632,NM_001145808                   | ITGAM                             | 1.950065155  | -3.550444345  | 0.459203     | 0.899027   | 0.119993    | 1.65058639  | 2.37153003 | 0.6785857  | 84    | 219   | 79    |
| 100507495 | NR_040047,NR_040048,NR_041SDCBP2-AS1     | SDCBP2 antisense RNA 1            | 1.258919127  | -3.55208443   | 2.88984      | 2.68948191 | 0.594895    | 2.97950517  | 1.34055586 | 1.34055586 | 214   | 360   | 294   |
| 9196      | NM_004732                                | KCNAB3                            | -1.438499085 | -3.555493387  | 1.782911     | 1.24319    | 0.483926    | 2.4003046   | 1.99055518 | 1.13820579 | 168   | 155   | 88    |
| 229860    | NM_006909                                | Ras protein specific guanine nucl | -1.211838492 | -3.557191836  | 0.071391     | 0.118964   | 0.057137    | 0.02885142  | 0.05625774 | 0.30202933 | 35    | 25    | 12    |
| 729867    | NR_123725                                | LOC729867                         | -1.865620469 | -3.57919836   | 0.300652     | 0.145538   | 0.91952222  | 0.91952222  | 0.56226574 | 0.30202933 | 35    | 25    | 12    |
| 4193      | NM_001145337,NM_001145339                | MDM2                              | -1.28777917  | -3.565380688  | 12.930611    | 10.051527  | 3.406966    | 6.5754705   | 6.21490035 | 4.7796009  | 3705  | 3844  | 1278  |
| 85366     | NM_033118                                | MYLK2                             | 1.227237953  | -3.567161114  | 1.16588      | 1.433238   | 0.305227    | 2.0648444   | 2.29513766 | 0.91876801 | 125   | 205   | 43    |
| 57509     | NM_001001924,NM_001001925                | MTUS1                             | 2.020644582  | -3.567841427  | 1.583149     | 4.179034   | 0.430834    | 3.44734922  | 4.5127108  | 1.9164689  | 389   | 1145  | 134   |
| 105753704 | NR_136270,NR_136271,NR_13LLOC105375304   | glycerol-3-phosphate dehydrogen   | 1.083265868  | -3.567967514  | 1.261112     | 1.458228   | 0.349076    | 0.97665845  | 1.03436685 | 0.34394329 | 38    | 55    | 12    |
| 2810      | NM_0012571199,NM_005276                  | keratin 6B                        | -2.539391325 | -3.5708599125 | 0.32933125   | 0.32933125 | 0.183451    | 1.81624731  | 0.93170533 | 0.93170533 | 9     | 34    | 3     |
| 3854      | NM_005555                                | KRT6B                             | -1.703301573 | -3.57160698   | 0.094069     | 0.051538   | 0.026017    | 0.29776659  | 0.18071335 | 0.0865753  | 9     | 7     | 3     |
| 255877    | NM_181844                                | BCL6B                             | -2.937033591 | -3.57160698   | 0.066795     | 0.022133   | 0.011341    | 0.29776659  | 0.10601836 | 0.0865753  | 9     | 4     | 3     |
| 1573      | NM_000775,NR_134981,NR_13-CYP2J2         | cytochrome P450 family 2 subfar   | 1.199771015  | -3.576422942  | 6.260504     | 7.444396   | 1.598397    | 3.64240927  | 3.88585523 | 2.07380058 | 451   | 723   | 155   |
| 100873954 | NR_046757                                | SNRK-AS1                          | 1.495575385  | -3.576576082  | 0.308069     | 0.461304   | 0.074946    | 1.03161781  | 1.3579479  | 0.36729312 | 41    | 82    | 14    |
| 3170      | NM_001271784,NM_153675                   | FOXA2                             | 2.076374743  | -3.581504645  | 0.804036     | 1.703667   | 0.208195    | 1.55375576  | 2.25837375 | 0.62147407 | 76    | 211   | 26    |
| 229860    | NR_0020735                               | forkhead box D4                   | 1.852004039  | -3.584055976  | 5.519104     | 1.972132   | 1.279584    | 1.08456012  | 1.62195412 | 0.39075094 | 44    | 108   | 19    |
| 102465874 | NR_107042                                | MIR8075                           | -1.451716328 | -3.5860172016 | 3.755366     | 2.619412   | 0.928333    | 0.27464693  | 0.1418164  | 0.1418164  | 12    | 11    | 4     |
| 348761    | NR_033879                                | SPATA3-AS1                        | 1.430658782  | -3.600172016  | 0.089171     | 0.122894   | 0.019288    | 0.38477185  | 0.52452456 | 0.1418164  | 12    | 23    | 4     |
| 101929639 | NR_108108,NR_108109,NR_108B4GALT1-AS1    | B4GALT1 antisense RNA 1           | 1.183385792  | -3.600172016  | 0.33684      | 0.314288   | 0.067471    | 0.38477185  | 0.44594451 | 0.1418164  | 12    | 19    | 4     |
| 4117      | NM_001242385,NM_001242957                | MAK                               | -1.143779296 | -3.600172016  | 0.075757     | 0.066222   | 0.018291    | 0.38477185  | 0.3412894  | 0.1418164  | 12    | 14    | 4     |
| 1685829   | NM_001168271,NM_153002                   | GPR156                            | 1.007628221  | -3.600172016  | 0.071282     | 0.107487   | 0.019371    | 0.46682716  | 0.92294555 | 0.14214747 | 15    | 10    | 12    |
| 102465436 | NR_106786                                | MIR8784                           | -1.002073241 | -3.600172016  | 3.796934     | 3.403952   | 0.849429    | 0.38477185  | 0.38406669 | 0.1418164  | 12    | 16    | 4     |
| 84251     | NM_001308203,NM_001350217                | SGIP1                             | -1.451716328 | -3.600172016  | 0.027568     | 0.019392   | 0.007304    | 0.38477185  | 0.27464693 | 0.1418164  | 12    | 11    | 4     |
| 101928243 | NR_110199,NR_110200                      | DARS-AS1                          | 2.34671552   | -3.617494092  | 1.977859     | 4.704204   | 0.490692    | 1.40904982  | 2.2895231  | 0.54161868 | 65    | 204   | 22    |
| 112817    | NM_001134670,NM_138413                   | HOGA1                             | -2.114356511 | -3.617494092  | 0.732958     | 0.358208   | 0.171289    | 1.40904982  | 0.83317479 | 0.54161868 | 65    | 41    | 22    |
| 399671    | NM_001220484,NM_203309                   | HEATR4                            | 1.097011744  | -3.617617675  | 0.119208     | 0.119208   | 0.022516    | 0.46682716  | 0.50527715 | 0.14214747 | 15    | 22    | 5     |
| 101929057 | NR_111915                                | LOC101929057                      | -1.990278261 | -3.617617675  | 0.036243     | 0.036243   | 0.019371    | 0.46682716  | 0.25173086 | 0.14214747 | 15    | 10    | 12    |
| 1556      | NR_001278                                | CYP2B7P                           | -1.00207692  | -3.617617675  | 0.127464     |            |             |             |            |            |       |       |       |

|           |                                   |                |                                    |              |              |             |            |            |             |             |            |      |      |      |
|-----------|-----------------------------------|----------------|------------------------------------|--------------|--------------|-------------|------------|------------|-------------|-------------|------------|------|------|------|
| 80741     | NM_025262                         | LY6G5C         | lymphocyte antigen 6 family men    | -1.6530563   | -3.774541496 | 1.112441    | 0.671924   | 0.273958   | 0.83964067  | 0.56226574  | 0.27153692 | 31   | 25   | 10   |
| 4923      | NM_002531                         | NTSR1          | neurotensin receptor 1             | 1.761257417  | -3.783814493 | 0.176958    | 0.308954   | 0.038699   | 0.07768602  | 1.1751656   | 0.24657076 | 28   | 66   | 9    |
| 400619    | NR_033876                         | LINC00511      | long intergenic non-protein codin  | 0.313457     | -3.783814493 | 0.173471    | 0.173471   | 0.073651   | 0.07768602  | 0.48576948  | 0.24657076 | 28   | 21   | 9    |
| 677815    | NR_002968                         | SNORA2C        | small nucleolar RNA, HACA box      | -1.18854808  | -3.783814493 | 4.525867    | 1.18854808 | 1.25519    | 0.7768602   | 0.68708806  | 0.24657076 | 28   | 32   | 2    |
| 101928120 | NM_001321726                      | LOC101928120   | uncharacterized LOC101928120       | -1.59244828  | -3.784167881 | 1.520047    | 0.955591   | 0.377131   | 1.44997615  | 1.06116576  | 0.54161868 | 57   | 57   | 22   |
| 653720    | NM_001282468                      | GOLGA8M        | golgin A8 family member M          | -2.38283471  | -3.798959796 | 0.293666    | 0.119589   | 0.072167   | 1.32354034  | 0.70406985  | 0.47868902 | 69   | 33   | 19   |
| 91120     | NM_001077349.NM_033196            | ZNF682         | zinc finger protein 682            | -1.110474876 | -3.802598841 | 1.563511    | 1.408786   | 0.382888   | 2.55837852  | 2.43303638  | 1.19154816 | 192  | 231  | 62   |
| 83999     | NM_001039570.NM_032045            | KREMEN1        | kingle containing transmembran     | 2.244229546  | -3.803136355 | 0.532367    | 1.201013   | 0.28860    | 2.05603457  | 3.01642692  | 0.87055986 | 124  | 372  | 40   |
| 9304      | NR_000008                         | SNORD22        | small nucleolar RNA, CID box 22    | -3.80333689  | -3.80333689  | 227.0304986 | 192.304986 | 56.034982  | 4.852591411 | 4.81965069  | 3.02550609 | 1095 | 46   | 1237 |
| 375208    | NM_001030311.NM_001030312         | CERKL          | ceramide kinase like               | -1.460608054 | -3.810155226 | 0.253927    | 0.063475   | 0.03726942 | 0.64188297  | 0.86372305  | 0.19530369 | 22   | 43   | 7    |
| 4143      | NM_000429                         | MAT1A          | methionine adenosyltransferase     | -2.912128606 | -3.810155226 | 0.164514    | 0.05747    | 0.035232   | 0.64188297  | 0.25173066  | 0.19530369 | 22   | 10   | 7    |
| 6404      | NM_001206609.NM_003006            | SEPLG          | selectin P ligand                  | -1.223447592 | -3.810155226 | 0.210287    | 0.183403   | 0.045618   | 0.64188297  | 0.54351856  | 0.19530369 | 22   | 24   | 7    |
| 4493      | NM_175617                         | MT1E           | metallothionein 1E                 | -5.870414817 | -3.812103925 | 4.293153    | 0.701126   | 1.061483   | 1.65056839  | 0.44594451  | 0.64076093 | 84   | 19   | 27   |
| 57538     | NM_002078                         | ALPK3          | alpha kinase 3                     | 1.391545905  | -3.813432109 | 6.998676    | 9.750935   | 1.724338   | 6.23651379  | 6.70782324  | 4.35812668 | 2921 | 5431 | 942  |
| 732799    | NR_026852                         | SEC14L1P1      | SEC14 like 1 pseudogene 1          | -1.647391746 | -3.825695054 | 1.773588    | 2.900044   | 1.170417   | 3.6972646   | 3.04669644  | 2.94513029 | 470  | 381  | 151  |
| 3120      | NM_001198585.NM_001300790         | HLA-DQB2       | major histocompatibility complex   | 1.296232707  | -3.829762838 | 0.391055    | 0.524618   | 0.097266   | 0.56944351  | 0.70406985  | 0.16897038 | 19   | 33   | 6    |
| 101927631 | NR_110007.NR_110008.NR_11ADNP-AS1 | ADNP           | ADNP antisense RNA 1               | 1.156291295  | -3.837563125 | 1.09327     | 1.284841   | 0.258353   | 1.08456011  | 1.19932051  | 0.36729312 | 44   | 68   | 14   |
| 127841    | NR_027022                         | LINC00628      | long intergenic non-protein codin  | -2.666828091 | -3.851468543 | 1.76798     | 0.659556   | 0.427871   | 1.69664266  | 0.8787583   | 0.65979727 | 88   | 44   | 28   |
| 129293    | NM_001080824.NM_001277053         | TRABD2A        | TraB domain containing 2A          | -1.100242379 | -3.864421854 | 1.429377    | 1.242037   | 0.245459   | 1.96964178  | 1.96964178  | 0.87055986 | 152  | 153  | 40   |
| 23603     | NM_001105237.NM_001276471         | CORO1C         | coronin 1C                         | -1.432043057 | -3.866723921 | 7.531099    | 40.234244  | 13.999271  | 7.77147488  | 7.25624213  | 5.83911505 | 8539 | 7967 | 2716 |
| 100287482 | NM_001195243                      | SMR1           | small lysine rich protein 1        | -3.325372243 | -3.867594877 | 1.262709    | 1.262709   | 1.022215   | 1.18729381  | 1.06873498  | 0.19530369 | 167  | 67   | 53   |
| 116154    | NM_001199505.NM_001199506         | PHACTR3        | phosphatase and actin regulator    | -1.608932922 | -3.874223832 | 11.414706   | 7.100898   | 2.763002   | 4.96975325  | 4.31134011  | 3.14210594 | 1191 | 989  | 378  |
| 101927811 | NR_110119.NR_110120               | LOC101927811   | uncharacterized LOC101927811       | -3.234011034 | -3.8837496   | 3.2954      | 1.039845   | 0.834095   | 1.96484452  | 0.92294555  | 0.80366934 | 114  | 47   | 36   |
| 27143     | NM_014431                         | PALD1          | phosphatase domain containing      | 1.578041725  | -3.886403162 | 0.414016    | 0.658582   | 0.09854    | 1.51570785  | 1.97664665  | 0.56199667 | 73   | 154  | 23   |
| 26226     | NR_033408                         | FBXW4P1        | F-box and VWD repeat domain co     | -1.050564633 | -3.888131206 | 1.074949    | 0.256043   | 1.02322    | 1.74129091  | 1.69172362  | 0.6758587  | 92   | 117  | 29   |
| 100506757 | NR_038998                         | LINC00629      | long intergenic non-protein codin  | -1.91541117  | -3.897409389 | 0.250929    | 0.125603   | 0.05675    | 4.01264541  | 0.2284445   | 0.11481614 | 73   | 91   | 6    |
| 51761     | NM_016584                         | IL23A          | interleukin 23 subunit alpha       | -1.09071182  | -3.90882469  | 1.009761    | 1.862716   | 1.272431   | 2.88111552  | 1.494580734 | 0.47670874 | 22   | 34   | 88   |
| 124995    | NM_145255.NM_148887.NR_03MRLP1    | LOC10050912    | mitochondrial ribosomal protein L  | -4.60639894  | -3.911453029 | 8.259401    | 9.189282   | 0.60839818 | 3.95487459  | 4.17673594  | 2.624      | 761  | 825  | 716  |
| 54921     | NM_001039690.NM_001040146         | CHTF8          | chromosome transmission fidelity   | 1.35787589   | -3.912557242 | 20.442025   | 27.866111  | 4.936195   | 5.88320984  | 6.31812263  | 3.98439467 | 2278 | 4133 | 716  |
| 57002     | NM_001282446.NM_020192            | YAE1D1         | Yae1 domain containing 1           | -1.332688249 | -3.916317549 | 22.766995   | 16.362585  | 5.179076   | 4.40088652  | 4.0088325   | 2.61727269 | 790  | 792  | 248  |
| 338657    | NM_198489.NR_1004049.NR_10_CDCD8A | LOC10050912    | colled-coil domain containing 84   | -2.872791254 | -3.921161108 | 45.063297   | 15.80272   | 5.85428279 | 4.37766975  | 3.95387191  | 2.632      | 2032 | 1038 | 700  |
| 6935      | NM_001128128.NM_001174033         | ZEB1           | zinc finger E-box binding homeo    | -1.538801323 | -3.922047396 | 1.048016    | 0.634699   | 0.254043   | 2.954472    | 2.35549733  | 1.4430085  | 226  | 216  | 83   |
| 100509512 | NR_037877                         | LOC100509512   | uncharacterized LOC100509512       | -1.28557478  | -3.92599178  | 2.258917    | 7.75852    | 1.92921862 | 1.33627915  | 1.33627915  | 0.19530369 | 23   | 20   | 7    |
| 374286    | NM_001282540.NM_006382            | CDRT1          | CMT1A duplicated region transcr    | -2.095083757 | -3.939386964 | 4.8173      | 2.198448   | 1.079956   | 3.82202563  | 2.86232771  | 2.11576522 | 516  | 329  | 161  |
| 7439      | NM_001139443.NM_001300786         | BEST1          | bestrophin 1                       | 2.334399418  | -3.939559925 | 0.646464    | 1.595425   | 0.152982   | 1.5285023   | 2.43303638  | 0.56199667 | 74   | 231  | 23   |
| 6023      | NR_030351                         | RMPR           | RNA component of mitochondrial     | -1.112095998 | -3.963566334 | 0.960703    | 0.871891   | 0.222272   | 0.29720407  | 0.08695753  | 0.08695753 | 10   | 12   | 3    |
| 105371849 | NR_135648                         | LOC105371849   | uncharacterized LOC105371849       | -2.625753038 | -3.963566334 | 0.371125    | 0.124643   | 0.063024   | 0.3273552   | 0.13134883  | 0.08695753 | 10   | 5    | 3    |
| 79365     | NR_002185                         | CRTFEP1        | effector receptor family 7 subfam  | -1.17853420  | -3.976458347 | 6.385221    | 7.54448847 | 1.1155     | 3.13271496  | 3.13271496  | 0.54161868 | 34   | 47   | 14   |
| 221756    | NR_033851                         | SERPINBP9P1    | serpin family B member 9 pseud     | -1.532732075 | -3.982466013 | 0.473308    | 0.305329   | 0.106855   | 0.66524311  | 0.46599441  | 0.19530369 | 23   | 20   | 7    |
| 91683     | NM_001177880.NM_001318773         | SYT12          | synaptotagmin 12                   | 5.185441178  | -3.983362069 | 3.681428    | 18.87052   | 3.84522223 | 0.86719     | 3.84522223  | 2.12264217 | 525  | 3638 | 162  |
| 10050660  | NR_038927                         | DDX11-AS1      | DDX11 antisense RNA 1              | -1.62908594  | -3.986224289 | 2.705395    | 1.661013   | 0.630419   | 2.67229041  | 2.10365798  | 1.23027657 | 211  | 173  | 65   |
| 10841     | NM_001320412.NM_006657            | NMFTCD         | formimidoyltransferase cyclodear   | -1.455613906 | -3.98778971  | 0.315199    | 0.115453   | 0.93882015 | 0.70406985  | 0.29607837  | 0.36       | 33   | 11   | 11   |
| 10122881  | NR_036480                         | VP89D1-AS1     | VP89D1 antisense RNA 1             | 1.677701811  | -4.008585854 | 13.512614   | 22.7055    | 3.161377   | 4.89957318  | 5.31171658  | 2.75942288 | 906  | 2031 | 278  |
| 100508278 | NR_135804                         | LOC101928728   | uncharacterized LOC101928728       | -1.483306192 | -4.008408428 | 1.686872    | 1.686872   | 0.109616   | 1.95951627  | 1.45708734  | 0.19530369 | 19   | 187  | 58   |
| 100528022 | NR_037958                         | BLOC1C1S1-RDH5 | BLOC1C1S1-RDH5 readthrough         | -1.500282337 | -4.008569753 | 3.156278    | 3.015728   | 0.734851   | 2.24618091  | 2.19057252  | 0.95030448 | 147  | 117  | 45   |
| 9687      | NM_014668.NM_033090.NM_14GREB1    | LOC10050912    | growth regulation by estrogen in   | -1.160845593 | -4.030148923 | 0.05962     | 0.073038   | 0.011783   | 0.59399636  | 0.52452456  | 0.16897038 | 20   | 23   | 6    |
| 124093    | NM_001031737                      | CDCD78         | colled-coil domain containing 78   | -1.550052369 | -4.054649377 | 6.600372    | 2.367736   | 4.09142887 | 3.50480544  | 2.30902414  | 630        | 543  | 191  | 270  |
| 100527964 | NR_033408                         | LHX4-AS1       | LHX4 antisense RNA 1               | 1.242321368  | -4.057225125 | 6.837006    | 10.903848  | 2.025977   | 4.56499597  | 4.86764179  | 2.72060695 | 891  | 1479 | 270  |
| 677826    | NR_002977                         | SNORA3B        | small nucleolar RNA, HACA box      | -1.797913048 | -4.0666495   | 57.319115   | 32.012077  | 13.162856  | 3.05929974  | 2.34470901  | 0.14830375 | 288  | 214  | 87   |
| 65879     | NM_001042762.NM_001287450         | LOC10050912    | insulin like                       | -1.484237650 | -4.070378650 | 3.345117    | 1.293311   | 1.333144   | 5.06516587  | 5.10961111  | 3.74448535 | 1953 | 1758 | 1752 |
| 1043      | NM_001803                         | CD52           | CD52 molecule                      | -2.292028919 | -4.091622934 | 0.352373    | 0.15526    | 0.079161   | 0.23670415  | 0.10601836  | 0.0585501  | 7    | 2    | 4    |
| 692107    | NR_003055                         | SNORD66        | small nucleolar RNA, CID box 66    | -1.846367714 | -4.091622934 | 2.106262    | 1.264044   | 0.489551   | 0.23670415  | 0.13134883  | 0.0585501  | 7    | 5    | 2    |
| 374407    | NM_153614                         | DNAJB13        | DnaJ heat shock protein family (I  | -2.292028919 | -4.091622934 | 0.097254    | 0.034449   | 0.015003   | 0.23670415  | 0.10601836  | 0.0585501  | 7    | 4    | 2    |
| 65975     | NM_001289058.NM_001289059         | STK33          | serine/threonine kinase 33         | -2.037304279 | -4.093863035 | 6.787595    | 14.036016  | 2.522951   | 4.93533846  | 3.95664704  | 3.04046258 | 1162 | 762  | 349  |
| 100750246 | NR_047116                         | HIF1A-AS1      | HIF1A antisense RNA 1              | -1.333318651 | -4.096385338 | 0.642719    | 0.503941   | 0.136472   | 0.5190475   | 0.40498891  | 0.14214747 | 17   | 19   | 7    |
| 6791      | NR_145774                         | SNORD70B       | small nucleolar RNA, CID box 70    | -1.78905963  | -4.097840248 | 1.175953    | 0.9289     | 0.09764028 | 1.175953    | 1.46595441  | 0.19530369 | 19   | 17   | 5    |
| 55815     | NM_001288990.NM_001288991         | TSNAXIP1       | translin associated factor X inter | -1.60307889  | -4.129355831 | 1.027389    | 0.550168   | 0.204642   | 1.73025772  | 2.23798388  | 0.64076093 | 67   | 195  | 27   |
| 100128361 | NR_036505                         | LOC100128361   | uncharacterized LOC100128361       | -1.369279867 | -4.133031156 | 0.842605    | 0.615873   | 0.192729   | 1.61502061  | 1.32539385  | 0.58209675 | 81   | 79   | 24   |
| 5919      | NM_002889                         | RARRES2        | retinoic acid receptor responder 2 | 1.276932979  | -4.173073391 | 2.619665    | 3.36767    | 0.588214   | 1.54118428  | 1.78245981  | 0.54161868 | 75   | 128  | 22   |
| 81606     | NM_030915                         | LBH            | limb bud and heart development     | 4.927307841  | -4.177205825 | 1.270603    | 6.281095   | 0.281093   | 2.21496103  | 4.24471769  | 0.30287695 | 143  | 942  | 42   |
| 100506123 | NR_030915                         | LOC100506123   | leish-like family 1A               | 1.355714414  | -4.18554849  | 0.657314    | 1.055498   | 0.406992   | 1.15225689  | 1.41092632  | 0.19530369 | 315  | 377  | 92   |
| 339416    | NR_198493                         | ANKRD45        | ankyrin repeat domain 45           | -1.038897293 | -4.194646762 | 0.13433     | 0.124858   | 0.029934   | 0.43999062  | 0.42561204  | 0.11481614 | 14   | 18   | 4    |
| 23475     | NM_001318249.NM_001318250         | QPRT           | quinolinate phosphoribosyltransf   | -1.24471483  | -4.194646762 | 0.149512    | 0.119897   | 0.033526   | 0.43999062  | 0.36283659  | 0.11481614 | 14   | 15   | 4    |
| 100126338 | NR_030633                         | MIR307         | microRNA 937                       | -2.314716033 | -4.19464676  |             |            |            |             |             |            |      |      |      |

|            |                                |               |                                      |              |              |            |             |            |             |             |            |       |       |      |
|------------|--------------------------------|---------------|--------------------------------------|--------------|--------------|------------|-------------|------------|-------------|-------------|------------|-------|-------|------|
| 100616256  | NR_039872                      | MIR4721       | microRNA 4721                        | -1.74594355  | -4.444747899 | 0.006021   | 0.604321    | 0.156866   | 0.13997292  | 0.08023518  | 0.02957205 | 4     | 3     | 1    |
| 141761     | NR_135289.NR_145490            | HCO15         | HLA complex group 15 (non-p          | 1.585898007  | -4.456801041 | 0.956454   | 1.527828    | 0.201259   | 0.88013425  | 1.22307764  | 0.24657076 | 33    | 70    | 9    |
| 1745       | NM_001038493.NM_178120         | DLX1          | distal-less homeobox 1               | -1.068719235 | -4.469891051 | 0.503114   | 0.471949    | 0.102697   | 1.08456011  | 1.03456085  | 0.32020533 | 44    | 55    | 12   |
| 6273       | NM_005978                      | S100A2        | S100 calcium binding protein A2      | 1.109418191  | -4.48656022  | 159.171265 | 165.685669  | 31.24741   | 7.13683221  | 7.28562428  | 5.0060315  | 8132  | 1568  | 1604 |
| 3626       | NM_005538                      | INHBC         | inhibin beta C subunit               | -2.478798657 | -4.491884134 | 0.111032   | 0.047505    | 0.024221   | 0.46682716  | 0.20477631  | 0.1148164  | 15    | 8     | 4    |
| 10324      | NM_006063                      | KLHL41        | kelch like family member 41          | -1.00207692  | -4.491884134 | 0.149695   | 0.158316    | 0.032448   | 0.46682716  | 0.46599441  | 0.1148164  | 15    | 20    | 4    |
| 677807     | NR_002961                      | SNORA22       | small nucleolar RNA, H/ACA box       | -1.535786607 | -4.491884134 | 2.800923   | 1.845889    | 0.477036   | 0.46682716  | 0.31941552  | 0.1148164  | 15    | 13    | 4    |
| 1053732419 | NR_134887                      | LOC1053732419 | uncharacterized LOC1053732419        | -1.990027621 | -4.491884134 | 0.576784   | 0.300129    | 0.090709   | 0.46682716  | 0.25173066  | 0.1148164  | 15    | 10    | 4    |
| 101092420  | NR_024417                      | LINC01634     | long intergenic non-protein codin    | -1.990027621 | -4.491884134 | 0.576784   | 0.300129    | 0.090709   | 0.46682716  | 0.25173066  | 0.1148164  | 15    | 10    | 4    |
| 100306975  | NR_036507                      | NDUF42-4P1    | NADH ubiquinone oxidoreductas        | -1.33294858  | -4.491884134 | 0.186565   | 0.117963    | 0.027625   | 0.46682716  | 0.36263659  | 0.1148164  | 15    | 15    | 4    |
| 767846     | NR_003242                      | PFN1P2        | profilin 1 pseudogene 2              | -1.427196617 | -4.491884134 | 0.198525   | 0.134865    | 0.04197    | 0.46682716  | 0.3412894   | 0.1148164  | 15    | 14    | 4    |
| 100652740  | NR_102400                      | PYCARD-AS1    | PYCARD antisense RNA 1               | -1.444815804 | -4.499398374 | 0.598794   | 0.422517    | 0.109525   | 0.73313634  | 0.54351856  | 0.19530369 | 26    | 24    | 7    |
| 58         | NM_001100                      | ACTA1         | actin, alpha 1, skeletal muscle      | 1.05177969   | -4.526447642 | 1.290946   | 1.353493    | 0.256703   | 1.5285023   | 1.57657016  | 0.49997203 | 74    | 104   | 20   |
| 72920      | NM_01242791                    | FLJ45513      | uncharacterized LOC72920             | 1.247051796  | -4.545037375 | 0.971593   | 1.205763    | 0.19903    | 1.57857476  | 1.79836126  | 0.52094563 | 78    | 130   | 21   |
| 26769      | NR_003838                      | SNORD81       | small nucleolar RNA, CID box 81      | 1.40612866   | -4.54596767  | 224.857635 | 159.908332  | 46.432616  | 4.1588115   | 3.89943092  | 2.23479744 | 62    | 629   | 179  |
| 100506066  | NR_103880                      | LOC100506066  | uncharacterized LOC100506066         | 1.250713852  | -4.550890852 | 0.731212   | 0.917709    | 0.142653   | 1.43846263  | 1.64851465  | 0.45708734 | 67    | 112   | 18   |
| 731220     | NM_001145664                   | RFX8          | RFX family member 8, lacking R       | -3.356751419 | -4.568695988 | 5.394568   | 1.598862    | 1.107891   | 3.33530968  | 1.89025622  | 1.57922529 | 357   | 142   | 96   |
| 643382     | NM_001146683                   | TMEM253       | transmembrane protein 253            | 1.92496332   | -4.575159001 | 0.325064   | 0.626313    | 0.064232   | 0.56944351  | 0.95166931  | 0.14214747 | 19    | 49    | 5    |
| 100129354  | NR_024046                      | NRADDP        | neurotrophin receptor associated     | -2.042040971 | -4.587523323 | 1.93274    | 0.934787    | 0.378553   | 1.54118428  | 0.95166931  | 0.49997203 | 75    | 49    | 20   |
| 112399     | NM_001308103.NM_022073         | EGLN3         | egl-9 family hypoxia inducible fac   | 2.192073177  | -4.615231926 | 1.373524   | 3.126689    | 0.278243   | 2.21486103  | 3.16793391  | 0.83730224 | 143   | 419   | 38   |
| 202020     | NR_027271                      | CRBP-AS1      | CRBP antisense RNA 1                 | 2.531045315  | -4.631299176 | 0.429985   | 1.122517    | 0.086497   | 0.66524311  | 1.31437719  | 0.16897038 | 23    | 78    | 6    |
| 10824      | NR_125391                      | DIAPH2-AS1    | DIAPH2 antisense RNA 1               | -1.912521085 | -4.631299176 | 0.610307   | 0.319817    | 0.122753   | 0.66524311  | 0.38406669  | 0.16897038 | 23    | 16    | 6    |
| 83706      | NM_031471.NM_178443            | FERMT3        | ferritin family member 3             | -1.294551681 | -4.635423166 | 2.237481   | 1.728021    | 0.447476   | 2.71768687  | 2.40826098  | 1.13825079 | 219   | 226   | 58   |
| 653316     | NR_038353                      | FAM153C       | family with sequence similarity 1f   | 8.137304158  | -4.666926526 | 0.192603   | 1.589071    | 0.030399   | 0.26755841  | 1.42093184  | 0.0585501  | 8     | 88    | 2    |
| 388795     | NM_001143967                   | EFCAB8        | EF-hand calcium binding domain       | 1.76726817   | -4.666926526 | 0.052511   | 0.092799    | 0.010092   | 0.26755841  | 0.44594451  | 0.0585501  | 8     | 19    | 2    |
| 6614       | NM_023068                      | SIGLEC1       | sialic acid binding II like lectin 1 | -1.763306246 | -4.666926526 | 0.031106   | 0.017127    | 0.005919   | 0.26755841  | 0.15642221  | 0.0585501  | 8     | 6     | 2    |
| 202020     | NM_001236050.NM_001286051      | FAM168A       | family with sequence similarity 1f   | 1.241130273  | -4.669083459 | 8.556961   | 1.72219371  | 0.59455195 | 6.38253618  | 3.80571836  | 0.1148164  | 23    | 3949  | 150  |
| 50839      | NM_003291                      | TAS2R10       | taste 2 receptor member 10           | 1.632597125  | -4.671709161 | 0.252921   | 1.232025    | 0.136648   | 1.00728891  | 0.19530369  | 0.19530369 | 27    | 59    | 7    |
| 388633     | NM_001010978.NM_001276392      | LDLRAD1       | low density lipoprotein receptor c   | -3.961319907 | -4.671709161 | 0.290201   | 0.073029    | 0.058805   | 0.7550755   | 0.2284445   | 0.19530369 | 27    | 9     | 7    |
| 51127      | NM_001024940.NM_001134855      | TRIM17        | tripartite motif containing 17       | -2.497121309 | -4.683754609 | 1.095751   | 0.442281    | 0.22047    | 1.69664266  | 0.92294555  | 0.56199667 | 88    | 47    | 23   |
| 257415     | NM_001040057.NM_001288584      | FAM133B       | family with sequence similarity 1f   | -5.784073848 | -4.687234125 | 13.075869  | 2.206048    | 2.553821   | 4.95442736  | 2.62883414  | 2.88736461 | 1178  | 272   | 309  |
| 387751     | NR_003945                      | GVNPF1        | GTPase, very large interferon inc    | 1.108576603  | -4.707519635 | 0.160633   | 0.167845    | 0.029748   | 1.24819496  | 1.33632702  | 0.36729312 | 54    | 80    | 14   |
| 202020     | NR_027096.NR_027697            | FAPV1B1       | FAPV1B1 antisense RNA 1 (head t      | 1.00838669   | -4.744384681 | 2.220201   | 1.744384681 | 0.243122   | 0.38477185  | 0.243122    | 0.19530369 | 120   | 159   | 120  |
| 100996664  | NR_135618                      | LOC100996664  | uncharacterized LOC100996664         | -1.230805124 | -4.747494905 | 0.138566   | 0.112581    | 0.017689   | 0.38477185  | 0.31941552  | 0.08695753 | 12    | 13    | 3    |
| 677849     | NR_004396                      | SNORD1B       | small nucleolar RNA, CID box 1B      | -1.002073241 | -4.747494905 | 3.355245   | 3.515925    | 0.658144   | 0.38477185  | 0.38406669  | 0.08695753 | 12    | 16    | 3    |
| 79838      | NM_001105248.NM_001105249      | TMC5          | transmembrane channel like 5         | -2.264393281 | -4.751019223 | 8.76161    | 3.720564    | 1.640972   | 5.34909629  | 4.21392593  | 3.22751932 | 1561  | 921   | 404  |
| 692088     | NR_003031                      | SNORD11       | small nucleolar RNA, CID box 11      | -1.333145184 | -4.789121507 | 0.683991   | 3.705917    | 0.085287   | 0.049317359 | 0.38406669  | 0.1148164  | 16    | 16    | 4    |
| 101051551  | NR_103482                      | LOC101051551  | uncharacterized LOC101051551         | -1.124220842 | -4.789121507 | 0.186274   | 0.758911    | 0.096362   | 0.44594451  | 0.44594451  | 0.1148164  | 16    | 16    | 4    |
| 344787     | NM_001137674                   | ZNF860        | zinc finger protein 860              | -1.031200945 | -4.801121942 | 2.451584   | 2.381995    | 0.477537   | 3.1155      | 3.07634485  | 1.37525411 | 301   | 390   | 77   |
| 3081       | NM_000187                      | HGD           | homogentisate 1,2-dioxygenase        | 1.308385209  | -4.83168326  | 0.405211   | 0.059347    | 0.68823103 | 0.84852988  | 0.16897038  | 0.16897038 | 24    | 42    | 6    |
| 728689     | NM_001099661.NM_001099661      | E1F3CL        | eukaryotic translation initiation fa | 1.20966758   | -4.838453829 | 98.316883  | 119.074164  | 19.011795  | 8.21580185  | 4.84957133  | 5.95971039 | 11633 | 18802 | 2957 |
| 80258      | NM_025184                      | EHF2C         | EF-hand domain containing 2          | 1.226718995  | -4.844019948 | 0.217843   | 0.507628    | 0.036879   | 0.77668602  | 1.38978355  | 0.19530369 | 28    | 85    | 7    |
| 399948     | NM_001302644.NM_001302645      | COLCA1        | colorectal cancer associated 1       | 1.042300596  | -4.844019948 | 0.13088    | 1.13804     | 0.021489   | 0.77668602  | 0.80196545  | 0.19530369 | 28    | 39    | 7    |
| 347694     | NR_026801                      | ECS1-1P2      | endothelin converting enzyme lik     | -2.069913478 | -4.844019948 | 0.559245   | 0.26544     | 0.10453    | 0.77668602  | 0.42561204  | 0.19530369 | 28    | 39    | 7    |
| 8029       | NM_001081                      | CUBN          | cubilin                              | 2.427637627  | -4.85334722  | 0.068709   | 0.160914    | 0.013302   | 0.86002952  | 1.57657016  | 0.22116404 | 32    | 104   | 8    |
| 83592      | NM_001040177.NM_001271021      | AKR1E2        | aldo-keto reductase family 1 mem     | -1.91148008  | -4.854530344 | 1.690348   | 1.390629    | 0.311446   | 1.89739865  | 1.71704117  | 0.64076093 | 107   | 120   | 27   |
| 58504      | NM_001256024.NM_001256025      | ARHGAP22      | Rho GTPase activating protein 22     | -3.685746076 | -4.864664034 | 3.790034   | 6.722288    | 3.45742019 | 1.89025622  | 1.60891398  | 1.60891398 | 392   | 142   | 99   |
| 105371919  | NR_146504                      | LINC01977     | long intergenic non-protein codin    | -1.227359535 | -4.872069504 | 2.14389    | 1.744725    | 0.404773   | 2.24618903  | 2.01797632  | 0.82068496 | 147   | 160   | 37   |
| 164781     | NM_001330004.NM_178821.NR_DAW1 | dyx11         | dyx11 assembly factor with WD        | 1.082399028  | -4.881511297 | 0.736369   | 0.736369    | 0.129791   | 1.224780673 | 1.34717796  | 0.36729312 | 56    | 81    | 14   |
| 604372     | NR_023149                      | LOC102353712  | lysine transporter 122 homol         | 1.554112499  | -4.886214602 | 1.510498   | 1.510498    | 0.357298   | 1.510498    | 1.272145837 | 0.1148164  | 14    | 133   | 13   |
| 10036      | NM_006794                      | GPR75         | G protein-coupled receptor 75        | 1.191343829  | -4.941882862 | 1.51405    | 1.805524    | 0.285718   | 2.0644484   | 2.2611178   | 0.71544405 | 125   | 191   | 31   |
| 50486      | NM_015714                      | GOS2          | G0/G1 switch 2                       | -1.079126789 | -4.963129419 | 281.050446 | 53.262169   | 8.04960606 | 7.93962546  | 5.75917693  | 10359      | 12826 | 2567  |      |
| 283130     | NM_001077241.NM_001278250      | SLC25A45      | solute carrier family 25 member 4    | 1.230920321  | -4.968843442 | 2.18824    | 3.947451    | 0.409506   | 2.92543304  | 3.18919702  | 1.21476721 | 259   | 426   | 64   |
| 102465452  | NR_106813                      | MIR6755       | microRNA 6755                        | -1.910386845 | -4.972218823 | 20.847389  | 10.985847   | 0.904908   | 1.23264156  | 0.77006602  | 0.34394329 | 51    | 37    | 13   |
| 7196       | NR_073383                      | HSP90B2P      | heat shock protein 90 beta family    | -1.556913438 | -4.976542282 | 0.461666   | 0.296191    | 0.06887    | 1.1689613   | 0.84852988  | 0.32020533 | 45    | 42    | 12   |
| 101027750  | NR_110273.NR_110274            | ATP1B1-AS1    | ATP1B1 antisense RNA 1 (head t       | -4.586501437 | -4.981842091 | 1.220205   | 0.257898    | 0.016515   | 2.91915522  | 0.29618407  | 0.19530369 | 51    | 61    | 12   |
| 79054      | NM_004080                      | TRPM8         | transient receptor potential can     | 1.031102386  | -4.981842091 | 0.205595   | 0.214214    | 0.036655   | 1.10178443  | 1.12560759  | 0.29607837 | 49    | 62    | 11   |
| 113157     | NR_002775                      | RPLP0P2       | ribosomal protein lateral stalk su   | 1.535775193  | -4.99519028  | 0.27097    | 0.419591    | 0.050281   | 0.95786335  | 1.29208824  | 0.24657076 | 37    | 76    | 9    |
| 574407     | NR_073154.NR_073155            | OBSN-AS1      | OBSN antisense RNA 1                 | 1.623562107  | -5.002695188 | 1.222156   | 2.124508    | 0.215319   | 1.76310734  | 2.2895231   | 0.56199667 | 94    | 204   | 23   |
| 204010     | NR_026825                      | RPSAP52       | ribosomal protein S4 pseudogen       | 1.427443256  | -5.004461617 | 7.751256   | 1.065888    | 0.124891   | 0.88013425  | 1.1381576   | 0.22116404 | 63    | 8     | 3    |
| 100861555  | NR_047495                      | LINC04305     | long intergenic non-protein codin    | 1.032204537  | -5.016530735 | 0.303855   | 0.303855    | 0.058253   | 0.95307781  | 0.19530369  | 0.19530369 | 29    | 41    | 6    |
| 10028731R  | NR_040245                      | LINC00941     | long intergenic non-protein codin    | -1.169513615 | -5.065036642 | 9.206781   | 7.872038    | 1.705835   | 1.6906145   | 3.95647074  | 2.12684217 | 667   | 762   | 162  |
| 222487     | NM_001308360.NM_170776         | ADGRG3        | adhesion G protein-coupled rece      | -3.720840141 | -5.08635888  | 0.162142   | 0.040409    | 0.029649   | 0.5190475   | 0.15624221  | 0.1148164  | 17    | 6     | 4    |
| 100134713  | NR_024454                      | NDUFB2-AS1    | NDUFB2 antisense RNA 1               | -1.806510326 | -5.109068639 | 0.651164   | 0.357789    | 0.117445   | 1.04948198  | 0.669904    | 0.27153692 | 42    | 31    | 10   |

|           |                                     |              |                                      |               |              |            |            |            |            |              |            |       |      |      |
|-----------|-------------------------------------|--------------|--------------------------------------|---------------|--------------|------------|------------|------------|------------|--------------|------------|-------|------|------|
| 203068    | NM_001293212,NM_001293213           | TUBB2E       | tubulin beta class I                 | -7.308004609  | -5.822039637 | 264.010817 | 38.54422   | 46.898002  | 9.41743903 | 6.56117323   | 6.8860234  | 26807 | 4901 | 5663 |
| 254228    | NM_153711                           | FAM26E       | family with sequence similarity 2f   | 2.460340928   | -5.83692536  | 0.127698   | 0.31538    | 0.020427   | 1.15225689 | 2.0043309    | 0.27153692 | 48    | 158  | 10   |
| 4703      | NM_001164507,NM_001164508           | NEB          | nebulin                              | 5.753976332   | -5.923382813 | 0.085909   | 0.014887   | 0.085909   | 0.46682716 | 1.58518474   | 0.08695753 | 15    | 116  | 3    |
| 101328605 | NR_126022                           | LOC101928605 | uncharacterized LOC101928605         | -1.112541313  | -5.923382813 | 0.371245   | 0.338787   | 0.055843   | 0.46682716 | 0.42612304   | 0.08695753 | 15    | 18   | 3    |
| 29999     | NM_020369                           | FSCN3        | fascin actin-bundling protein 3      | -1.662261819  | -5.923382813 | 0.202466   | 0.123075   | 0.022348   | 0.46682716 | 0.29720487   | 0.08695753 | 15    | 12   | 3    |
| 3620      | NM_002164                           | IDO1         | indoleamine 2,3-dioxygenase 1        | -2.207683847  | -5.923382813 | 0.190343   | 0.087775   | 0.021738   | 0.46682716 | 0.2284445    | 0.08695753 | 15    | 9    | 3    |
| 128854    | NR_002781                           | TSPY26P      | testis specific protein, Y-linked 2f | -1.12763486   | -5.978070998 | 0.383359   | 0.042423   | 0.064991   | 0.53939636 | 0.54351856   | 0.1148164  | 20    | 24   | 4    |
| 169044    | NM_152888                           | COL22A1      | collagen type XXII alpha 1 chain     | -45.8298444   | -5.998674092 | 0.580588   | 0.010596   | 0.091156   | 2.20692365 | 0.10601836   | 0.6785857  | 142   | 4    | 29   |
| 2873      | NR_073405                           | PRKXP1       | protein kinase, X-linked, pseudo     | 1.908366987   | -6.004383126 | 1.328251   | 2.404581   | 0.207152   | 3.96331833 | 4.8070381    | 1.80120704 | 586   | 1416 | 586  |
| 3456      | NM_001329790,NM_002084              | GPX3         | glutathione peroxidase 3             | -5.719690102  | -6.004383126 | 0.733931   | 0.757027   | 0.697027   | 1.25705307 | 1.28596533   | 0.08695753 | 11    | 73   | 64   |
| 65987     | NM_001282406,NM_023930              | KCTD14       | potassium channel tetramerizatic     | -1.165484049  | -6.007379698 | 0.5642198  | 0.861288   | 0.064285   | 3.35339967 | 0.86610484   | 1.34055586 | 362   | 3330 | 74   |
| 170891    | NM_130057                           | ADAMTS17     | ADAM metalloproteinase with thrc     | 1.643799938   | -6.011470992 | 0.101931   | 0.168252   | 0.012575   | 0.71085398 | 1.03456085   | 0.14214747 | 25    | 55   | 5    |
| 10096295  | NR_102401                           | DNAH17-AS1   | DNAH17 antisense RNA 1               | -2.038288739  | -6.012673688 | 0.56765    | 0.278743   | 0.087462   | 1.9554003  | 1.26944952   | 0.56199967 | 113   | 74   | 23   |
| 56603     | NM_001277742,NM_0019885             | CYP26B1      | cytochrome P450 family 26 subf       | -1.251409078  | -6.033987767 | 0.172094   | 0.137351   | 0.02615    | 0.81895953 | 0.68708906   | 0.16897038 | 30    | 32   | 6    |
| 246754    | NR_027025                           | MYR2         | mouse mammary tumor virus rec        | -3.316654989  | -6.050195456 | 1.096294   | 0.32075    | 0.162076   | 0.09192222 | 0.3412884    | 0.19530369 | 35    | 14   | 7    |
| 23109     | NM_015086                           | DDN          | dendrin                              | -1.295129608  | -6.080310963 | 0.854304   | 0.169148   | 0.054843   | 2.33822656 | 2.04485997   | 0.73325001 | 159   | 164  | 32   |
| 130752    | NM_001039845,NM_001282940           | MDH1B        | malate dehydrogenase 1B              | 1.689946851   | -6.099450831 | 0.620272   | 1.070707   | 0.094815   | 1.47662297 | 2.01116974   | 0.36729312 | 120   | 59   | 14   |
| 100533195 | NR_037915                           | FAM24B-CUZD1 | FAM24B-CUZD1 readthrough             | -1.820651614  | -6.120258628 | 1.196488   | 0.654285   | 0.18157    | 2.02024721 | 1.42093184   | 0.58206975 | 70    | 188  | 24   |
| 55335     | NM_018376,NR_130759,NR_131NIPSNAP3B |              | ripsnap homolog 3                    | -12.42477542  | -6.211576173 | 1.067208   | 0.085325   | 0.463506   | 2.84588727 | 0.58077243   | 0.99569924 | 243   | 26   | 48   |
| 3172      | NM_000457,NM_001030003,MHNF4A       |              | hepatocyte nuclear factor 4 alpha    | -6.753953642  | -6.222506243 | 0.19401    | 0.024436   | 0.024918   | 0.93882015 | 0.18071335   | 0.19530369 | 36    | 7    | 7    |
| 400866    | NM_001024457,NM_001024457,PGPDI     |              | RANBP2-like and GRIP domain c        | -1.620302958  | -6.233055318 | 9.40792    | 5.890515   | 1.417299   | 5.96195729 | 5.27950886   | 0.34788301 | 2408  | 1985 | 475  |
| 5199      | NM_001145252,NM_002621              | CFP          | complement factor properdin          | 1.687639474   | -6.234371851 | 0.458867   | 0.794111   | 0.065929   | 0.83964067 | 1.22307764   | 0.16897038 | 31    | 70   | 8    |
| 100128770 | NR_047572                           | LOC100128770 | uncharacterized LOC100128770         | -1.100055541  | -6.36469367  | 0.35289    | 0.321393   | 0.052257   | 1.04948198 | 0.97983233   | 0.22116494 | 42    | 51   | 6    |
| 84189     | NM_0032229                          | SLITRK6      | SLIT and NTRK like family memt       | 1.193438268   | -6.36469367  | 0.261439   | 0.309936   | 0.038246   | 1.04948198 | 1.18729361   | 0.22116494 | 42    | 67   | 8    |
| 100009676 | NR_024407                           | ZBTB11-AS1   | ZBTB11 antisense RNA 1               | 1.264582735   | -6.368268715 | 1.750821   | 2.223722   | 0.257971   | 2.52684435 | 2.81230346   | 0.80366934 | 187   | 316  | 36   |
| 1768      | NM_0013730                          | DNAH6        | dynein axonemal heavy chain 6        | 2.502804743   | -6.392837302 | 0.020665   | 0.050801   | 0.003124   | 0.35634914 | 0.77006602   | 0.0585501  | 11    | 37   | 2    |
| 34568     | NM_00102176                         | ITF1         | interferon beta 1                    | -1.1291441463 | -6.392837302 | 0.304555   | 0.296243   | 0.046584   | 0.35634914 | 0.31941552   | 0.1148164  | 11    | 13   | 1    |
| 102465501 | NR_108692                           | MIR6834      | microRNA 6834                        | -2.415817531  | -6.392837302 | 0.345639   | 1.30941    | 0.438564   | 0.35634914 | 0.15622201   | 0.0585501  | 11    | 6    | 2    |
| 200350    | NM_0012184                          | FOXDL1       | forkhead box D4-like 1               | 1.607244501   | -6.447433555 | 0.926879   | 1.504138   | 0.135383   | 1.5285023  | 2.01116974   | 0.36729312 | 74    | 159  | 14   |
| 834       | NM_001223,NM_001257118,NMCASP1      |              | caspase 1                            | -3.478022289  | -6.454620188 | 4.803505   | 1.470838   | 0.528877   | 3.04155747 | 1.62195412   | 1.08290869 | 284   | 109  | 54   |
| 5745      | NM_000316,NM_001184744              | PTH1R        | parathyroid hormone 1 receptor       | -1.440492791  | -6.490241655 | 0.33169    | 0.22139    | 0.035752   | 0.7550755  | 0.56226574   | 0.14214747 | 27    | 25   | 5    |
| 100528021 | NM_001199760                        | ST20-MTHFS   | ST20-MTHFS readthrough               | -1.063786403  | -6.515830564 | 0.462885   | 0.60816    | 0.06816    | 1.06712766 | 1.02107213   | 0.22116494 | 43    | 54   | 8    |
| 57003     | NM_001303034,NM_001303035           | CE2RNA10     | cholinergic receptor nicotinic alp   | -1.030327442  | -6.530247132 | 0.043436   | 0.204733   | 0.070228   | 1.98025622 | 2.86025622   | 0.22116494 | 317   | 329  | 73   |
| 144983    | NM_001011724,NM_001011725           | HNRNPAL12    | heterogeneous nuclear ribonucle      | -1.1874308    | -6.536775913 | 19.87739   | 17.295841  | 3.021685   | 5.54756029 | 5.350547101  | 2.99956471 | 1797  | 2022 | 338  |
| 79930     | NM_001144875,NM_001144876           | DOK3         | docking protein 3                    | -1.078649241  | -6.545169756 | 10.784526  | 10.14972   | 1.500984   | 4.55559896 | 4.451177     | 2.1482678  | 884   | 1095 | 166  |
| 389058    | NM_001003845                        | SP5          | Sp5 transcription factor             | -1.088205274  | -6.572545744 | 0.268935   | 0.295474   | 0.049063   | 0.64188297 | 0.59904473   | 0.1148164  | 22    | 22   | 4    |
| 100506797 | NR_144530                           | LOC100506797 | uncharacterized LOC100506797         | 1.065437812   | -6.572545744 | 0.930783   | 0.953284   | 0.131071   | 0.64188297 | 0.6899904    | 0.1148164  | 22    | 22   | 4    |
| 120493228 | NR_030638                           | MIR5140      | microRNA 5140                        | -1.606531546  | -6.606531546 | 1.500892   | 2.80575987 | 0.287344   | 1.61071476 | 0.3019415582 | 0.02910762 | 6     | 13   | 3    |
| 170933    | NM_173541                           | C10orf1      | chromosome 10 open reading fra       | -1.05396345   | -6.657332394 | 2.499291   | 2.385899   | 0.347541   | 1.48977343 | 1.44132992   | 0.34394329 | 71    | 98   | 13   |
| 57571     | NM_001166222,NM_020811              | CARNS1       | carnosine synthase 1                 | -3.3758918    | -6.657332394 | 0.463434   | 0.136767   | 0.061206   | 0.87177343 | 0.61708849   | 0.34394329 | 71    | 20   | 13   |
| 93589     | NM_172364                           | CACNA2D4     | calcium voltage-gated channel a      | -1.902820957  | -6.708420598 | 0.374343   | 0.196685   | 0.049997   | 1.56621863 | 1.02107213   | 0.36729312 | 74    | 16   | 14   |
| 100874048 | NR_104029,NR_104030                 | DGUOK-AS1    | DGUOK antisense RNA 1                | -1.632265749  | -6.734233015 | 0.560859   | 0.382808   | 0.768676   | 2.21486103 | 1.69172362   | 0.62147005 | 143   | 117  | 24   |
| 386993    | NR_027828                           | CHKB-CPT1B   | CHKB-CPT1B readthrough (NMC          | -3.526354041  | -6.769978173 | 6.632281   | 1.878617   | 0.916844   | 4.83976575 | 3.14324318   | 2.34475282 | 1085  | 411  | 197  |
| 55003     | NM_001025127                        | CELSR2       | C-type lectin domain family 2 me     | -1.0426264    | -6.786247839 | 1.892293   | 1.898249   | 0.188873   | 1.89824935 | 2.249872436  | 0.34394329 | 71    | 197  | 20   |
| 6364      | NM_001034852,NM_0022137             | SMOC1        | SPARC related modular calcium        | -12.54549809  | -6.796340175 | 0.057953   | 0.400381   | 0.693104   | 4.27155466 | 1.30327576   | 1.88448459 | 709   | 177  | 130  |
| 1809      | NM_001197294,NM_001387              | DPLYSL3      | dihydropyrimidinase like 3           | -2.822968928  | -6.835524104 | 0.161889   | 0.05716    | 0.021777   | 0.89996265 | 0.38406669   | 0.16897038 | 34    | 16   | 6    |
| 389118    | NM_001007540                        | CDHR4        | cadherin related family member 4     | -1.194745119  | -6.835524104 | 0.34794    | 0.293871   | 0.042358   | 0.89996265 | 0.7861039    | 0.16897038 | 34    | 38   | 6    |
| 5420      | NM_001018111,NM_005397              | PODXL        | podocalyxin like                     | 1.984552646   | -6.866790004 | 28.710484  | 57.221207  | 7.38434285 | 8.86797544 | 0.46350501   | 6516       | 17278 | 1167 | 4    |
| 283748    | NM_178034                           | PLAG2AD      | phospholipase A2 group IVD           | 1.39739799    | -6.869783171 | 0.165065   | 0.232738   | 0.022308   | 0.80652411 | 0.86077236   | 0.1148164  | 23    | 43   | 4    |
| 1141732   | NM_001005176,NM_00127840            | SP140        | SP140 nuclear body protein           | -2.273360175  | -6.8892549   | 1.9892549  | 1.9892549  | 1.5285023  | 2.40307361 | 2.40307361   | 0.34394329 | 71    | 13   | 74   |
| 6364      | NM_001130046,NM_004591              | CCCL20       | C-C motif chemokine ligand 20        | -1.447915472  | -6.948044259 | 3.34629    | 4.857195   | 0.427441   | 1.50272898 | 2.31737991   | 0.47868902 | 108   | 209  | 19   |
| 100129203 | NR_110295                           | LOC100129203 | uncharacterized LOC100129203         | -2.633321293  | -6.968140894 | 0.159775   | 0.059708   | 0.020194   | 0.38477185 | 0.15624221   | 0.0585501  | 12    | 6    | 2    |
| 165545    | NM_133637                           | DOX1         | DEAQ-box RNA dependent ATPf          | -1.432802374  | -6.969012318 | 0.2857     | 0.199977   | 0.031743   | 0.79797761 | 0.59904473   | 0.14214747 | 29    | 27   | 1    |
| 10517     | NM_001267585,NM_001267586           | FBXW10       | F-box and WD repeat domain co        | 1.173978646   | -7.012311289 | 0.808118   | 1.000579   | 0.104684   | 1.91699278 | 2.09080288   | 0.47868902 | 109   | 171  | 19   |
| 7275      | NM_003320,NM_177972                 | TUB          | tubry bipartite transcription facto  | -3.014536448  | -7.059871114 | 1.42329    | 1.038606   | 0.050605   | 1.86749926 | 0.90836632   | 0.45076734 | 104   | 46   | 18   |
| 1601      | NM_00120252                         | NKX3         | nuclear RNA export factor 3          | 5.975331023   | -7.099107071 | 0.25512    | 1.46501    | 0.024685   | 0.64446555 | 1.89025622   | 0.16897038 | 111   | 142  | 12   |
| 114614    | NR_001458                           | MIR155HG     | MIR155 host gene                     | -1.19342291   | -7.05728902  | 4.006356   | 3.35746    | 0.527519   | 2.75626978 | 2.541776     | 0.85412573 | 226   | 253  | 39   |
| 8436      | NM_004657                           | CAVIN2       | caveolae associated protein 2        | -1.127102202  | -7.16702049  | 0.193032   | 0.215872   | 0.02454    | 0.68823103 | 0.75384785   | 0.1148164  | 24    | 36   | 4    |
| 100507034 | NR_038284                           | PITRM1-AS1   | PITRM1 antisense RNA 1               | -1.154324256  | -7.172673309 | 0.602945   | 0.695201   | 0.076428   | 1.76310734 | 1.91234364   | 0.41288872 | 94    | 146  | 16   |
| 346653    | NM_001012454,NM_001128926           | FAM71F2      | family with sequence similarity 7    | -1.227462144  | -7.210947969 | 2.07609    | 1.631726   | 0.286088   | 3.66296259 | 3.3407809    | 1.38699077 | 458   | 479  | 78   |
| 7304827   | NM_001178087,NM_001178087           | SERP1F3      | serpin EDNRK-like family 1B          | -2.154043678  | -7.264868724 | 3.347941   | 3.347941   | 2.87341    | 1.98726196 | 2.85526952   | 0.22116494 | 616   | 278  | 61   |
| 402862    | NM_001015072                        | UFSP1        | UFM1 specific peptidase 1 (inact     | -1.42358042   | -7.271515038 | 1.256884   | 0.883472   | 0.149024   | 1.15225689 | 0.89363826   | 0.22116494 | 48    | 45   | 48   |
| 57821     | NM_001300968,NM_001300969           | CCDC181      | coiled-coil domain containing 181    | -18.73304973  | -7.307137942 | 0.971074   | 0.03791    | 0.108346   | 1.50279892 | 0.13134883   | 0.32020933 | 72    | 5    | 12   |
| 26212     | NM_012367                           | OR2B6        | olfactory receptor family 2 subfar   | -1.49543595   | -7.436676357 | 0.104642   | 1.528911   | 0.127314   | 0.95786335 | 1.2694       |            |       |      |      |

|           |                                                 |                              |                                      |              |              |           |            |             |            |             |            |      |      |     |
|-----------|-------------------------------------------------|------------------------------|--------------------------------------|--------------|--------------|-----------|------------|-------------|------------|-------------|------------|------|------|-----|
| 50840     | NM_023922                                       | TAS2R14                      | taste 2 receptor member 14           | -1.210192875 | -8.967211578 | 4.206043  | 3.486632   | 0.430101    | 2.29940604 | 2.08433212  | 0.52094563 | 154  | 170  | 21  |
| 646626    | NR_045484                                       | LOC646626                    | uncharacterized LOC646626            | 2.093017141  | -0.039749032 | 1.317573  | 2.781092   | 0.131936    | 1.10178443 | 1.76638114  | 0.16897038 | 46   | 126  | 6   |
| 727751    | NR_102747.NR_102747_dup1                        | LOC727751                    | uncharacterized LOC727751            | -1.201408701 | -9.15194227  | 5.776235  | 4.738342   | 0.630341    | 4.19135823 | 3.9424051   | 1.52834475 | 678  | 754  | 91  |
| 387763    | NM_001145033                                    | C11orf86                     | chromosome 11 open reading fra       | 2.051164092  | -9.269355261 | 0.31227   | 0.640305   | 0.030103    | 0.40317359 | 0.8787583   | 0.0585501  | 16   | 44   | 2   |
| 221091    | NM_203422                                       | LRRN4CL                      | LRRN4 C-terminal like                | 1.153276587  | -9.398763786 | 0.858436  | 0.989447   | 0.078844    | 1.66222564 | 1.806524674 | 0.29607837 | 85   | 131  | 11  |
| 100134368 | NR_024453                                       | LOC100134368                 | uncharacterized LOC100134368         | 1.277338874  | -9.451046536 | 0.397685  | 0.509958   | 0.025447    | 0.68823103 | 0.83317479  | 0.08695753 | 24   | 41   | 3   |
| 57653     | NR_036527.NR_036528.NR_031LOC100499484-C9ORF174 | LOC100499484-C9orf174 readth | LOC100499484-C9orf174 readth         | 1.234414619  | -9.485498304 | 1.373445  | 1.774005   | 0.140855    | 3.30216484 | 3.57802367  | 0.95003448 | 348  | 574  | 45  |
| 5342      | NM_002665.NM_002665_dup1                        | PLGLB2                       | plasminogen-like B2                  | 1.551525943  | -9.602250967 | 0.341347  | 0.53766    | 0.030938    | 0.1932966  | 1.36863803  | 0.14214747 | 40   | 83   | 5   |
| 103637086 | NR_038289                                       | DLG1-AS1                     | DLG1 antisense RNA 1                 | 1.26826413   | -9.746707275 | 1.597389  | 1.226446   | 0.142317    | 1.86749926 | 1.80307149  | 0.34394329 | 104  | 107  | 13  |
| 84848     | NR_024607                                       | MIR503HG                     | MIR503 host gene                     | 1.65350642   | -9.842156845 | 1.801738  | 1.091459   | 0.078304    | 0.88013425 | 1.25799563  | 0.11481164 | 33   | 73   | 4   |
| 388182    | NR_028139.NR_028140                             | SPATA1A                      | spermatogenesis associated 41 (      | 1.58418039   | -9.843009172 | 0.285928  | 0.326049   | 0.034316    | 0.71085839 | 1.00745609  | 0.08065753 | 25   | 53   | 3   |
| 102465252 | NR_106761                                       | MIR6506                      | microRNA 6506                        | -10.6458598  | -9.849208082 | 3.228991  | 0.095229   | 0.14363     | 0.29776659 | 0.02724389  | 0.02957205 | 9    | 1    | 1   |
| 102465460 | NR_106826                                       | MIR6768                      | microRNA 6768                        | -1.494302911 | -9.849208082 | 3.270159  | 2.048574   | 0.035733    | 0.29776659 | 0.20477631  | 0.02957205 | 9    | 8    | 1   |
| 53833     | NM_144717                                       | IL20RB                       | interleukin 20 receptor subunit b    | -5.368437989 | -10.10939726 | 38.784317 | 7.229547   | 3.604535    | 6.29055972 | 3.94419393  | 3.11132089 | 3034 | 755  | 369 |
| 101930452 | NR_120479                                       | LINC02367                    | long intergenic non-protein codin    | -1.334717434 | -10.13939422 | 0.199895  | 0.147945   | 0.017896    | 0.89996295 | 0.72035408  | 0.11481164 | 34   | 34   | 4   |
| 414235    | NR_027151.NR_027152                             | PRP26                        | proline rich 26                      | -2.801105781 | -10.32040696 | 0.458644  | 0.186397   | 0.028172    | 1.06712766 | 0.50527715  | 0.14214747 | 43   | 22   | 4   |
| 79827     | NM_024769                                       | CLMP                         | CXADR like membrane protein          | -2.850467565 | -10.37908267 | 0.678391  | 0.238608   | 0.054114    | 1.56621863 | 0.75384785  | 0.24657076 | 77   | 36   | 9   |
| 1282      | NM_001303110.NM_001845                          | COL4A1                       | collagen type IV alpha 1 chain       | -2.97104653  | -10.41996245 | 0.070563  | 0.023959   | 0.006108    | 0.54446555 | 0.20477631  | 0.0585501  | 18   | 8    | 2   |
| 4208      | NM_001131005.NM_001193347                       | MEF2C                        | myocyte enhancer factor 2C           | -1.778641756 | -10.44243762 | 0.209644  | 0.117729   | 0.017919    | 1.21691895 | 0.80196545  | 0.16897038 | 52   | 39   | 6   |
| 2122      | NM_001105077.NM_001105078                       | MECOM                        | MDS1 and EVI1 complex locus          | -1.222195455 | -10.44339845 | 6.970974  | 5.913587   | 0.601257    | 5.26463133 | 4.98344494  | 2.19620105 | 1470 | 1607 | 173 |
| 105374104 | NR_146853.NR_146654                             | LINC02021                    | long intergenic non-protein codin    | 1.875848578  | -10.53027592 | 0.8028482 | 1.974302   | 0.063608    | 1.35261029 | 1.96964178  | 0.19530369 | 61   | 153  | 7   |
| 23416     | NM_001314030.NM_012284                          | KCNH3                        | potassium voltage-gated channel      | -2.243593028 | -10.62693444 | 0.182005  | 0.080689   | 0.01544     | 0.7550755  | 0.38406669  | 0.08065753 | 27   | 16   | 3   |
| 8740      | NM_003807.NM_172014                             | TNFSF14                      | TNF superfamily member 14            | -1.127007431 | -10.84522866 | 1.353614  | 1.203583   | 0.117011    | 2.87121968 | 2.72348335  | 0.65979727 | 248  | 294  | 28  |
| 414224    | NR_029396                                       | AGAP12P                      | ArtfGAP with GTPase domain, an       | -1.56320476  | -10.86682829 | 3.353729  | 2.152562   | 0.280448    | 3.00082115 | 2.45415268  | 0.71544405 | 275  | 235  | 31  |
| 254268    | NM_152763.NR_049760                             | AKNAD1                       | AKNA domain containing 1             | -2.976090887 | -11.27794829 | 0.393557  | 0.131204   | 0.030815    | 1.13562816 | 0.48576948  | 0.14214747 | 47   | 21   | 5   |
| 2898      | NM_001166247.NM_021956                          | MMGRK2                       | glutamate ionotropic receptor kai    | 1.270889103  | -11.57059693 | 0.108182  | 0.140882   | 0.008462    | 0.59399636 | 0.72085408  | 0.0585501  | 20   | 34   | 2   |
| 10544     | NM_001131692.NM_005824                          | RRX17                        | neutrophin rich repeat containing 17 | -2.044039079 | -11.57059693 | 0.111914  | 0.225817   | 0.05939686  | 0.91919752 | 0.31919752  | 0.0585501  | 105  | 107  | 13  |
| 101730217 | NR_103346                                       | SPECC1L-ADORA2A              | SPECC1L-ADORA2A readthrough          | -2.261340084 | -12.04847371 | 2.44713   | 1.105836   | 0.18765     | 0.40022383 | 2.95745524  | 1.16514558 | 589  | 355  | 5   |
| 114769    | NM_001017534.NM_052889                          | CARD16                       | caspace recruitment domain fam       | -2.306913375 | -12.272732   | 4.319328  | 1.900656   | 0.323907    | 2.02927762 | 1.22307764  | 0.32020933 | 121  | 70   | 12  |
| 163154    | NM_001134316                                    | PRR22                        | proline rich 22                      | 1.000538532  | -12.58858032 | 7.135587  | 7.149422   | 0.527325    | 3.41670749 | 3.4174117   | 0.82068496 | 380  | 508  | 37  |
| 6616      | NM_001322902.NM_001322903                       | SNAP25                       | synaptosome associated protein       | -4.382280448 | -12.81453057 | 0.473981  | 0.103916   | 0.032364    | 1.06712766 | 0.31941552  | 0.11481164 | 43   | 13   | 4   |
| 84812     | NM_0032726                                      | PLCD4                        | phospholipase C delta 4              | -1.399904416 | -12.81453057 | 0.344261  | 0.247401   | 0.020536    | 0.83317479 | 0.83317479  | 0.11481164 | 43   | 41   | 4   |
| 101928020 | NR_110291                                       | LOC101928020                 | uncharacterized LOC101928020         | 1.137320279  | -13.92641156 | 1.624829  | 2.13621    | 0.113228    | 1.78459872 | 0.40926109  | 0.24657076 | 107  | 169  | 9   |
| 27239     | NM_014449.NM_019858                             | GPR162                       | G protein-coupled receptor 162       | -2.770693771 | -13.29648041 | 0.228858  | 0.129967   | 0.015889    | 0.66524311 | 0.27464693  | 0.0585501  | 23   | 11   | 2   |
| 101927402 | NR_136167                                       | LOC101927402                 | uncharacterized LOC101927402         | -2.277448609 | -13.8717784  | 0.3167    | 1.39415    | 0.020324    | 0.68823103 | 0.3412894   | 0.0585501  | 24   | 14   | 2   |
| 100505692 | NR_103838                                       | FTO-IT1                      | FTO intronic transcript 1            | 1.10159926   | -14.15459817 | 1.082535  | 1.180737   | 0.04595     | 0.93882015 | 1.00745609  | 0.08695753 | 36   | 53   | 3   |
| 100142659 | NM_001278507                                    | CTAGE8                       | CTAGE family member 8                | -1.009977041 | -14.52572833 | 8.647431  | 0.854896   | 0.557702    | 4.76605286 | 1.84504029  | 1.4863075  | 1029 | 136  | 87  |
| 79160     | NR_125359                                       | LINC01711                    | long intergenic non-protein codin    | -1.54045608  | -14.54054608 | 3.594389  | 3.604389   | 0.049732    | 2.13520373 | 2.13520373  | 0.08695753 | 99   | 126  | 12  |
| 440352    | NR_002939                                       | SNX2P2                       | sorting nexin 29 pseudogene 2        | -2.77949722  | -14.65050339 | 1.195368  | 0.424993   | 0.069296    | 1.51570785 | 0.73744528  | 0.16897038 | 73   | 35   | 6   |
| 730112    | NM_001099951.NM_001164310                       | FAM166B                      | family with sequence similarity 11   | -3.815183569 | -15.02239118 | 0.654563  | 0.030313   | 0.073313634 | 0.2284445  | 0.0585501   | 26         | 9    | 2    |     |
| 109729180 | NR_146320                                       | SNHG26                       | small nucleolar RNA host gene 2      | -1.74677331  | -16.10685969 | 20.236681 | 11.589586  | 1.173883    | 4.00480921 | 3.26553914  | 0.95003448 | 591  | 452  | 45  |
| 149773    | NR_034147                                       | APCDD1LAS1                   | APCDD1L antisense RNA 1 (hea         | 2.593819869  | -16.21653189 | 1.165601  | 3.045789   | 0.058005    | 1.76310734 | 2.85093665  | 0.19530369 | 94   | 326  | 7   |
| 115207    | NM_138444                                       | KCTD12                       | potassium channel tetramericzatic    | -1.204221787 | -16.38137905 | 0.229785  | 0.18919    | 0.012756    | 1.26358189 | 1.11294744  | 0.11481164 | 55   | 61   | 4   |
| 6819      | NM_001056.NM_176825                             | SLIT2C                       | semaphorin 2C                        | 1.3072399494 | -16.73085083 | 1.526746  | 6.656515   | 0.094816    | 2.37926962 | 4.03926109  | 0.32020933 | 165  | 810  | 12  |
| 54097     | NM_058186.NM_209694                             | FAM3B                        | family with sequence similarity 3    | -1.68518687  | -16.8518687  | 4.161579  | 6.215068   | 0.218209    | 2.72881625 | 3.22403445  | 0.41288872 | 221  | 438  | 16  |
| 164284    | NM_001304787.NM_153360                          | NRAPCDD1L                    | APC down-regulated 1 like            | 3.700640201  | -16.89833662 | 0.310986  | 1.354714   | 0.011123    | 1.06712766 | 2.33928445  | 0.08695753 | 43   | 213  | 3   |
| 100527960 | NR_037639.NR_037640.NR_031MROH7-TTC4            | MROH7-TTC4 readthrough (NM   | MROH7-TTC4 readthrough (NM           | 1.04774811   | -17.05511241 | 0.339354  | 0.358198   | 0.166564    | 1.66222564 | 1.70865125  | 0.16897038 | 85   | 119  | 6   |
| 100996928 | NM_001244584                                    | C7orf55-LUC7L2               | C7orf55-LUC7L2 readthrough           | -1.27336568  | -17.49584403 | 7.326924  | 5.761171   | 0.392237    | 4.36546531 | 4.03591166  | 1.08290869 | 770  | 808  | 54  |
| 6854      | NM_003178.NM_133625                             | SYN2                         | synapsin II                          | -2.535858526 | -17.57032854 | 0.417621  | 0.167773   | 0.02027     | 1.32354034 | 0.669904    | 0.11481164 | 59   | 31   | 4   |
| 2850      | NM_018971                                       | GPR227                       | G protein-coupled receptor 27        | 4.9505396711 | -18.45057212 | 1.050713  | 4.95053967 | 0.045137    | 1.89739865 | 2.389571    | 0.19530369 | 107  | 709  | 7   |
| 4013      | NM_001130142.NM_014622                          | NMVAASA                      | von Willebrand factor A domain c     | -2.62822869  | -19.66474041 | 1.642977  | 0.38466    | 0.043761    | 2.10810423 | 1.1751656   | 0.22116494 | 130  | 66   | 8   |
| 700379251 | NR_037806                                       | NPPA-AS1                     | NPPA antisense RNA 1                 | 1.199539383  | -20.57156178 | 2.126097  | 2.565709   | 0.087803    | 2.15835987 | 2.36620557  | 0.22116494 | 136  | 218  | 8   |
| 84557     | NM_032514.NM_181509                             | MAP1LC3A                     | microtubule associated protein 1     | -3.579961838 | -20.6084782  | 4.160349  | 1.179905   | 0.190339    | 2.29192162 | 1.06116576  | 0.24657076 | 153  | 57   | 9   |
| 8309      | NM_003500                                       | ACOX2                        | acyl-CoA oxidase 2                   | 1.38654696   | -22.3261265  | 0.840999  | 1.179218   | 0.034541    | 1.54118428 | 1.86782539  | 0.11481164 | 75   | 139  | 4   |
| 644634    | NM_001348147.NR_145442                          | FAM231D                      | family with sequence similarity 23   | -4.78376937  | -22.35430264 | 5.996438  | 2.3946     | 0.463728    | 3.98869623 | 2.03820547  | 0.73352601 | 584  | 163  | 32  |
| 6048      | NM_006913                                       | RNF5                         | ring finger protein 5                | 1.199707449  | -22.77777616 | 1.33059   | 1.600317   | 0.036265    | 1.30878272 | 1.47139626  | 0.08695753 | 58   | 93   | 3   |
| 9886      | NM_0011242359.NM_001350902                      | RHOBTB1                      | Rho related BTB domain contain       | -1.77902118  | -23.56170143 | 0.338723  | 0.192375   | 0.008746    | 1.33814853 | 0.89363826  | 0.08695753 | 63   | 45   | 3   |
| 387923    | NM_001010897.NM_001346980                       | SERP2                        | stress associated endoplasmic re     | -1.403163342 | -23.65194506 | 1.06467   | 0.913667   | 0.039738    | 1.03161781 | 0.80196545  | 0.0585501  | 41   | 39   | 2   |
| 1462      | NM_001126336.NM_001164097                       | VCAN                         | versican                             | -4.308209953 | -24.14000181 | 0.624462  | 0.145244   | 0.02308     | 3.09843961 | 1.4614436   | 0.39027104 | 297  | 92   | 15  |
| 11213     | NM_001142523.NM_007199                          | IRAK3                        | interleukin 1 receptor associated    | 1.854858441  | -24.83207123 | 0.453229  | 0.839187   | 0.014387    | 2.22275497 | 2.96451939  | 0.19530369 | 144  | 357  | 7   |
| 414889    | NM_001001786                                    | BLID                         | BH3-like motif containing, cell de   | -2.277448609 | -26.06258963 | 0.725083  | 0.299932   | 0.006888    | 0.68823103 | 0.3412894   | 0.02957205 | 24   | 14   | 1   |
| 401428    | NR_002158.NR_002158_dup1                        | OR2A20P                      | olfactory receptor family 2 sulfat   | -6.262884548 | -26.06258963 | 0.650076  | 0.095512   | 0.016623    | 0.68823103 | 0.13134883  | 0.02957205 | 14   | 5    | 1   |
| 133396    | NM_001242636.NM_001242637                       | IL31RA                       | interleukin 31 receptor A            | -9.245673945 | -30.22506624 | 0.689325  | 0.064032   | 0.014081    | 1.56621863 | 0.27464693  | 0.08695753 | 77   | 11   | 3   |
| 100529207 | NR_037714                                       | RAD51L3-RFFL                 | RAD51L3-RFFL readthrough             | -1.874820551 | -30.494199   |           |            |             |            |             |            |      |      |     |

**Supplementary Table 2. Proteomic analysis of the lysates of derivative cells (Panc0203, SP0926, SP1030)**

| Group ID | Protein name                             | GI accession | MW (Da) | Protein score | Unique peptides | Peptide sequence                  | Expect   |
|----------|------------------------------------------|--------------|---------|---------------|-----------------|-----------------------------------|----------|
| 110      | Heat shock protein 90 kD                 | 386786       | 83554   | 542           | 11              | R.ADHGEPIGR.G                     | 0.021    |
|          |                                          |              |         |               |                 | R.YESLTDPSK.L                     | 0.0019   |
|          |                                          |              |         |               |                 | K.LGIHEDSTNR.R                    | 0.0071   |
|          |                                          |              |         |               |                 | K.YIDQEELNK.T                     | 0.00044  |
|          |                                          |              |         |               |                 | K.SIYYITGESK.E                    | 0.0016   |
|          |                                          |              |         |               |                 | K.ADLINNLTGIAK.S                  | 9.6e-005 |
|          |                                          |              |         |               |                 | R.DNSTMGYMAK.K                    | 1.7e-005 |
|          |                                          |              |         |               |                 | K.EQVANSFVER.V                    | 0.011    |
|          |                                          |              |         |               |                 | R.DNSTMGYMAK.K + Oxidation (M)    | 0.00074  |
|          |                                          |              |         |               |                 | R.TLTLVDTGIGMTK.A + Oxidation (M) | 3.8e-008 |
|          |                                          |              |         |               |                 | K.EGLELPEDEEEK.K                  | 0.018    |
| 550      | Set                                      | 338039       | 32115   | 291           | 5               | K.SGKDLTKR.S                      | 0.0012   |
|          |                                          |              |         |               |                 | R.VEVTEFEDIK.S                    | 1.40E-05 |
|          |                                          |              |         |               |                 | R.LNEQASEEILK.V                   | 0.0006   |
|          |                                          |              |         |               |                 | K.EFHLNESGDPSSK.S                 | 0.00068  |
|          |                                          |              |         |               |                 | K.ELNSNHDGADETSEK.E               | 0.00016  |
| 727      | Calphobindin                             | 226434       | 35971   | 245           | 6               | R.ADAETLR.K                       | 0.041    |
|          |                                          |              |         |               |                 | R.QEISAAFK.T                      | 0.039    |
|          |                                          |              |         |               |                 | R.ADAETLRK.A                      | 0.0033   |
|          |                                          |              |         |               |                 | K.GDTS GDYK.K.A                   | 0.015    |
|          |                                          |              |         |               |                 | K.VLTEIIASR.T                     | 0.00067  |
|          |                                          |              |         |               |                 | K.HALKGAGTNEK.V                   | 0.047    |
| 676      | Lasp-1 protein                           | 1584035      | 30185   | 165           | 4               | R.DSQDGSSYR.R                     | 0.00069  |
|          |                                          |              |         |               |                 | K.TQDQISNIK.Y                     | 0.016    |
|          |                                          |              |         |               |                 | K.QQSELQSQVR.Y                    | 0.018    |
|          |                                          |              |         |               |                 | R.MGPSGGEGMEPER.R                 | 0.0022   |
| 676      | Glyceraldehyde-3-phosphate dehydrogenase | 31645        | 36202   | 130           | 3               | K.VGVNGFGR.I                      | 0.036    |
|          |                                          |              |         |               |                 | K.AGAHLQGGAK.R                    | 0.0016   |
|          |                                          |              |         |               |                 | K.VVKQASEGPLK.G                   | 0.0058   |
| 113      | TNF receptor-associated protein 1        | 17511976     | 80345   | 98            | 1               | R.GVVDSEDIPLNLSR.E                | 4.20E-08 |
| 538      | Phosphoglycerate kinase 1                | 387020       | 44985   | 91            | 2               | K.YAEAVTR.A                       | 0.0063   |
| 519      | AHNAK nucleoprotein, partial             | 178281       | 180065  | 44            | 1               | K.NNQITNNQR.I                     | 0.0022   |
| 676      | Annexin A2                               | 113950       | 38808   | 43            | 1               | K.VGGSGVNVNAK.G                   | 0.0089   |
| 1210     | Spleen mitotic checkpoint BUB3           | 2921873      | 37587   | 40            | 1               | R.TNQELQEINR.V                    | 0.011    |
| 110      | alanyl (membrane) aminopeptidase (CD13)  | 37590640     | 109870  | 38            | 1               | R.QVTD AETKPK.S                   | 0.028    |
| 676      | LMNA protein                             | 21619981     | 53222   | 38            | 1               | K.DNEETGFGSGTR.A                  | 0.006    |
| 550      | Pre-mRNA splicing factor                 | 307438       | 56873   | 38            | 1               | R.SGAQASSTPLSPTR.I                | 0.031    |
| 110      | X-prolyl aminopeptidase                  | 12804541     | 57658   | 37            | 1               | R.LIVENLSSR.C                     | 0.033    |
| 550      | SH3-containing protein SH3GLB2           | 8896094      | 44175   | 37            | 1               | K.AILFVPR.R                       | 0.027    |
| 550      | Transformer-2 alpha                      | 1256837      | 32726   | 36            | 1               | K.KAKAAEAK.A                      | 0.042    |
|          |                                          |              |         |               |                 | R.ANGMELDGR.R                     | 0.021    |

**Supplementary Table 2.** Commonly upregulated 10 spots ( $fc \geq 2$ ) from both SP0926 and SP1030 compared to Panc0203 were analyzed by using  $\mu$ LC-MS/MS. Among the paired groups, 2 spots have no significant hits to report. Sixteen proteins were identified in the remaining 8 spots in which about 40% were identified as containing multiple proteins. Protein score is  $-10 \cdot \log(P)$ , where P is the probability that the observed match is a random event. Individual protein scores  $> 34$  indicate identity or extensive homology ( $p < 0.05$ ). Database: nr\_Human\_20180410\_curated (1249071 sequences; 414470512 residues).

Supplementary Table 3. Proteomic analysis of TME-derived exosomes compared to normal TME exosomes (commonly found spots)

| Group ID | Protein name                           | GI accession | MW (Da) | Protein score | Unique peptides | Peptide sequence                | Expect   |
|----------|----------------------------------------|--------------|---------|---------------|-----------------|---------------------------------|----------|
| 256      | Fibulin-1D*                            | 1621019      | 81329   | 99            | 3               | R.GYHLNEEGTR.C                  | 0.019    |
|          |                                        |              |         |               |                 | R.YMDGMTVGIVR.Q                 | 4.80E-05 |
|          |                                        |              |         |               |                 | R.YMDGMTVGIVR.Q + Oxidation (M) | 0.0004   |
| 612      | Proteasome subunit Y                   | 558528       | 25527   | 90            | 2               | R.DGSSGGVIR.L                   | 0.014    |
| 259      | Antithrombin                           | 28907        | 53025   | 86            | 2               | R.TTTGSYIANR.V                  | 0.0026   |
|          |                                        |              |         |               |                 | K.LPGIVAEGR.D                   | 0.0051   |
| 607      | Triosephosphate isomerase*             | 37247        | 26938   | 50            | 1               | K.TSDQIHFFFAK.L                 | 0.0077   |
| 171      | Stratifin (14-3-3 protein sigma)*      | 23270783     | 27871   | 49            | 1               | K.SNEEGSEEKGPEVR.E              | 0.00094  |
| 784      | protein TALPID3 isoform X2             | 1370465841   | 177822  | 40            | 1               | K.TNSVETLPSQR.F                 | 0.023    |
| 171      | Band-6-protein                         | 535015       | 81637   | 39            | 1               | R.TGNAEIQK.Q                    | 0.026    |
| 432      | Interstitial retinol-binding protein 3 | 186541       | 135734  | 38            | 1               | K.LAQGAYR.T                     | 0.011    |
| 270      | Family 3 adenylate cyclase             | 1369241066   | 61290   | 38            | 1               | R.IGAGEDVRL.L                   | 0.016    |
| 170      | Lactoferrin (Lactotransferrin)*        | 187122       | 80242   | 38            | 1               | R.YYGYTGAFR.C                   | 0.023    |
| 653      | Complement component C4A*              | 179674       | 194337  | 38            | 1               | R.QGSFQGGFR.S                   | 0.026    |
| 270      | p21-activated kinase 4                 | 73536296     | 33060   | 37            | 1               | R.KMLVGTPYWMAPELI               | 0.046    |
|          |                                        |              |         |               |                 | SR.L + Oxidation (M)            |          |
| 432      | Abhydrolase domain containing 14B*     | 13938225     | 22446   | 36            | 1               | R.LAQAGYR.A                     | 0.018    |
| 653      | p23                                    | 438652       | 18971   | 36            | 1               | R.KGESGQSWPR.L                  | 0.039    |
| 198      | Plasminogen*                           | 819324110    | 93306   | 36            | 1               | R.GTSSTITGR.K                   | 0.04     |

**Supplementary Table 3.** Commonly upregulated 17 paired spots ( $fc \geq 2$ ) from s-TME exosomes compared to n-TME were analyzed by using  $\mu$ LC-MS/MS. Among the paired groups, 3 spots have no significant hits to report and 3 spots were keratin family. Fifteen proteins were identified in the remaining 11 spots. Ions score is  $-10 \times \log(P)$ , where P is the probability that the observed match is a random event. Individual ions scores  $> 34$  indicate identity or extensive homology ( $p < 0.05$ ). Database: nr\_Human\_20180410\_curated (1249071 sequences; 414470512 residues). Asterisk; reported exosomal protein (Contents of the Exosome Gene Product Set presented by EMBL-EBI: EMBL's European Bioinformatics Institute, <https://www.ebi.ac.uk/QuickGO/GProteinSet?id=Exosome>)

Supplementary Table 4. Proteomic analysis of TME-derived exosomes compared to normal TME exosomes (Unpaired spots)

| Group ID | Protein name                         | GI accession | MW (Da) | Protein score | Unique peptides | Peptide sequence              | Expect   |
|----------|--------------------------------------|--------------|---------|---------------|-----------------|-------------------------------|----------|
| 609      | Proteasome subunit alpha type-3*     | 130859       | 28643   | 417           | 10              | K.LYEEGSNK.R                  | 0.01     |
|          |                                      |              |         |               |                 | K.DGVVFGVEK.L                 | 0.017    |
|          |                                      |              |         |               |                 | R.QAAKTEIEK.L                 | 0.0035   |
|          |                                      |              |         |               |                 | K.LYEEGSNKR.L                 | 0.0073   |
|          |                                      |              |         |               |                 | R.VFQVEYAMK.A                 | 0.00015  |
|          |                                      |              |         |               |                 | K.TEIEKLQMK.E                 | 0.0054   |
|          |                                      |              |         |               |                 | R.VFQVEYAMK.A + Oxidation (M) | 0.00031  |
|          |                                      |              |         |               |                 | K.TEIEKLQMK.E + Oxidation (M) | 0.0033   |
|          |                                      |              |         |               |                 | R.SNFGYNIPLK.H                | 0.036    |
|          |                                      |              |         |               |                 | K.AVENSSTAIGIR.C              | 0.014    |
| 609      | T-complex protein 1 subunit epsilon* | 1351211      | 60089   | 123           | 2               | K.AVANTMR.T                   | 0.0069   |
| 227      | Complement C8-beta propeptide        | 29575        | 63605   | 59            | 1               | R.IADGYEQAAAR.V               | 1.90E-06 |
| 232      | Mac-2 binding protein (LGALS3BP)*    | 307153       | 66202   | 54            | 1               | R.SDLEVAHYK.L                 | 0.00027  |
| 666      | Lipoprotein Gln I                    | 229479       | 28329   | 42            | 1               | R.LADGGATNQGR.V               | 0.00055  |
| 451      | Gelsolin*                            | 225304       | 86043   | 40            | 1               | K.DSGRDYVSQFQGSA              | 0.012    |
|          |                                      |              |         |               |                 | LGK.Q                         |          |
| 451      | Gelsolin*                            | 225304       | 86043   | 40            | 1               | R.EGGQTAPASTR.L               | 0.015    |

**Supplementary Table 4.** Detected 5 unpaired spots ( $fc \geq 2$ ) only for s-TME exosomes except for n-TME exosomes were analyzed by using  $\mu$ LC-MS/MS. Six proteins were identified in the unpaired spots. Ions score is  $-10 \times \log(P)$ , where P is the probability that the observed match is a random event. Individual ions scores  $> 34$  indicate identity or extensive homology ( $p < 0.05$ ). Database: nr\_Human\_20180410\_curated (1249071 sequences; 414470512 residues). Asterisk; reported exosomal protein (Contents of the Exosome Gene Product Set presented by EMBL-EBI: EMBL's European Bioinformatics Institute, <https://www.ebi.ac.uk/QuickGO/GProteinSet?id=Exosome>)

**Supplementary Video 1. Spontaneous TNTs formation from a derivative cell line. Bright-field light microscopy images of SP0926.** The time-lapse frames were captured every minute for about 5 h under normoxia within normal culture medium. The video runs at 30 frames/s. x400 magnification.

**Supplementary Video 2. Densely embedded spots of green fluorescent dye acquired from MØ-U937<sup>CMFDA</sup> in CMTMR-positive pancreatic cancer cells.** In the in vitro TME model system, Panc0203 (labeled in red with the fluorescent dye CMTMR) were co-incubated with macrophages differentiated from U937 cells (MØ-U937; labeled in green with the fluorescent dye CMFDA) followed by FACS, seeding on culture dish(s) and confocal microscopy experiments in order.
